# Supplementary material for: Tissue-Specific Transcriptomes in the Secondary Cell Wall Provide an Understanding of Stem Growth Enhancement in Solidago canadensis during Invasion
Source: MDPI journal article supplement (doi:10.3390/biology12101347), 2023-10-20

Figure S1

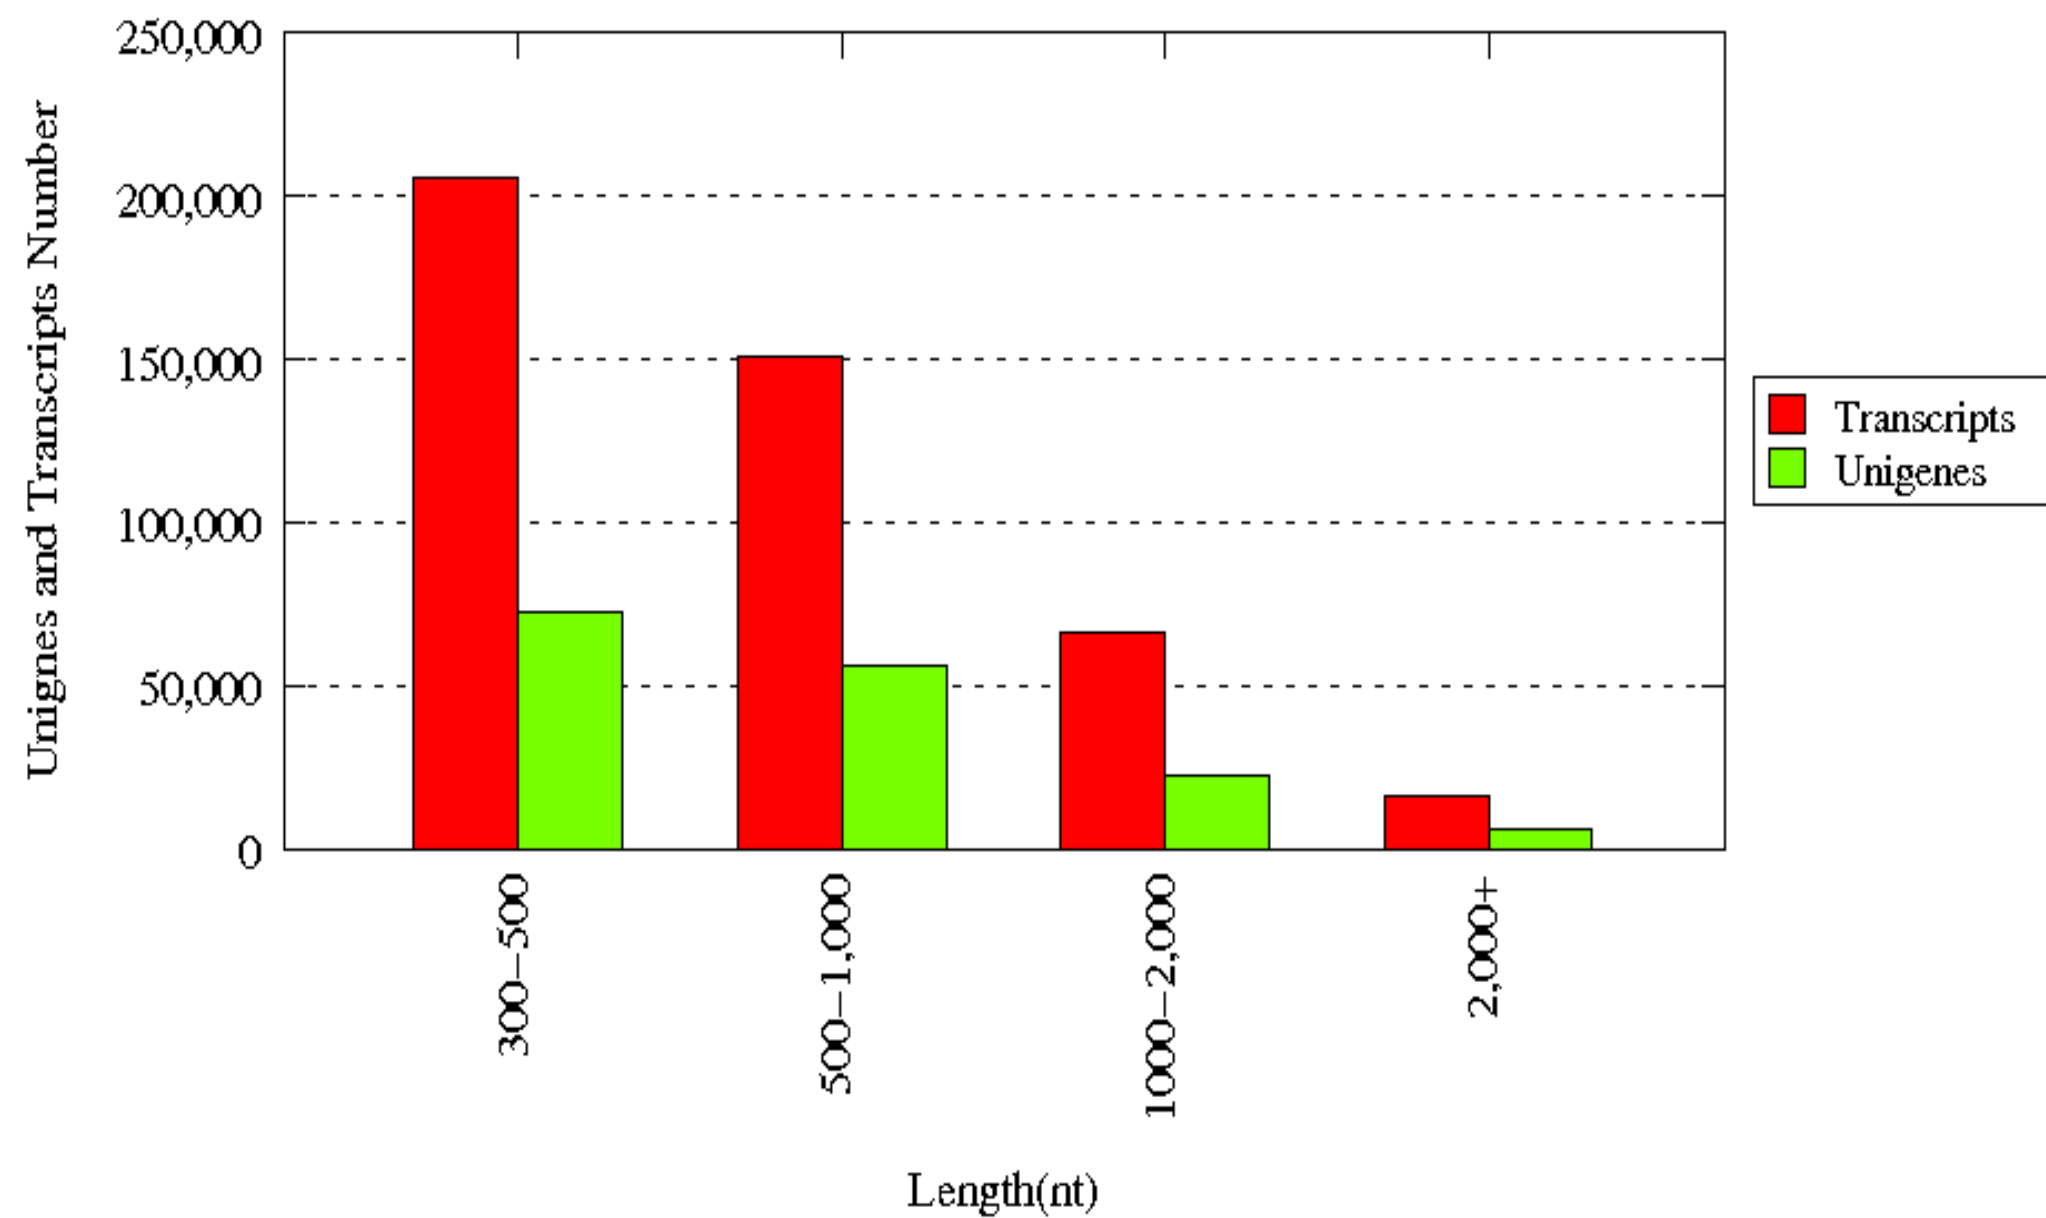

Figure S2

## Nr Homologous Species Distribution

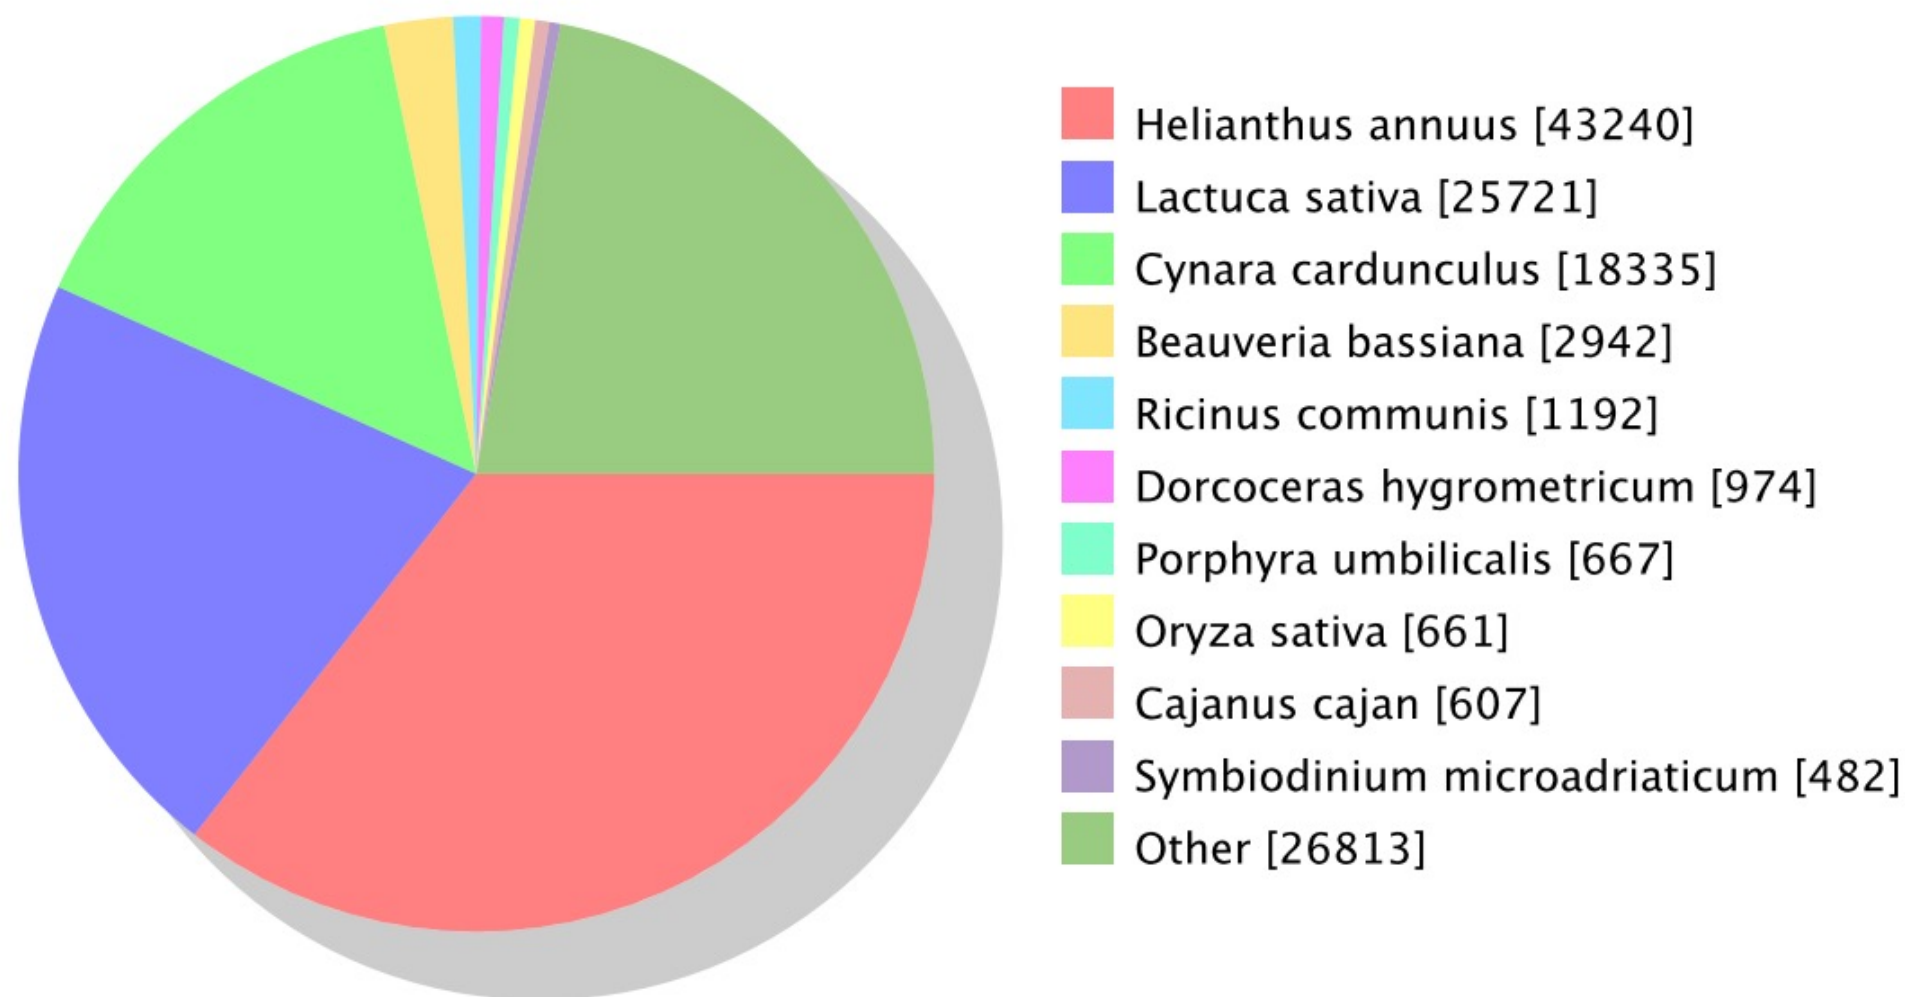

Figure S3

# COG Function Classification

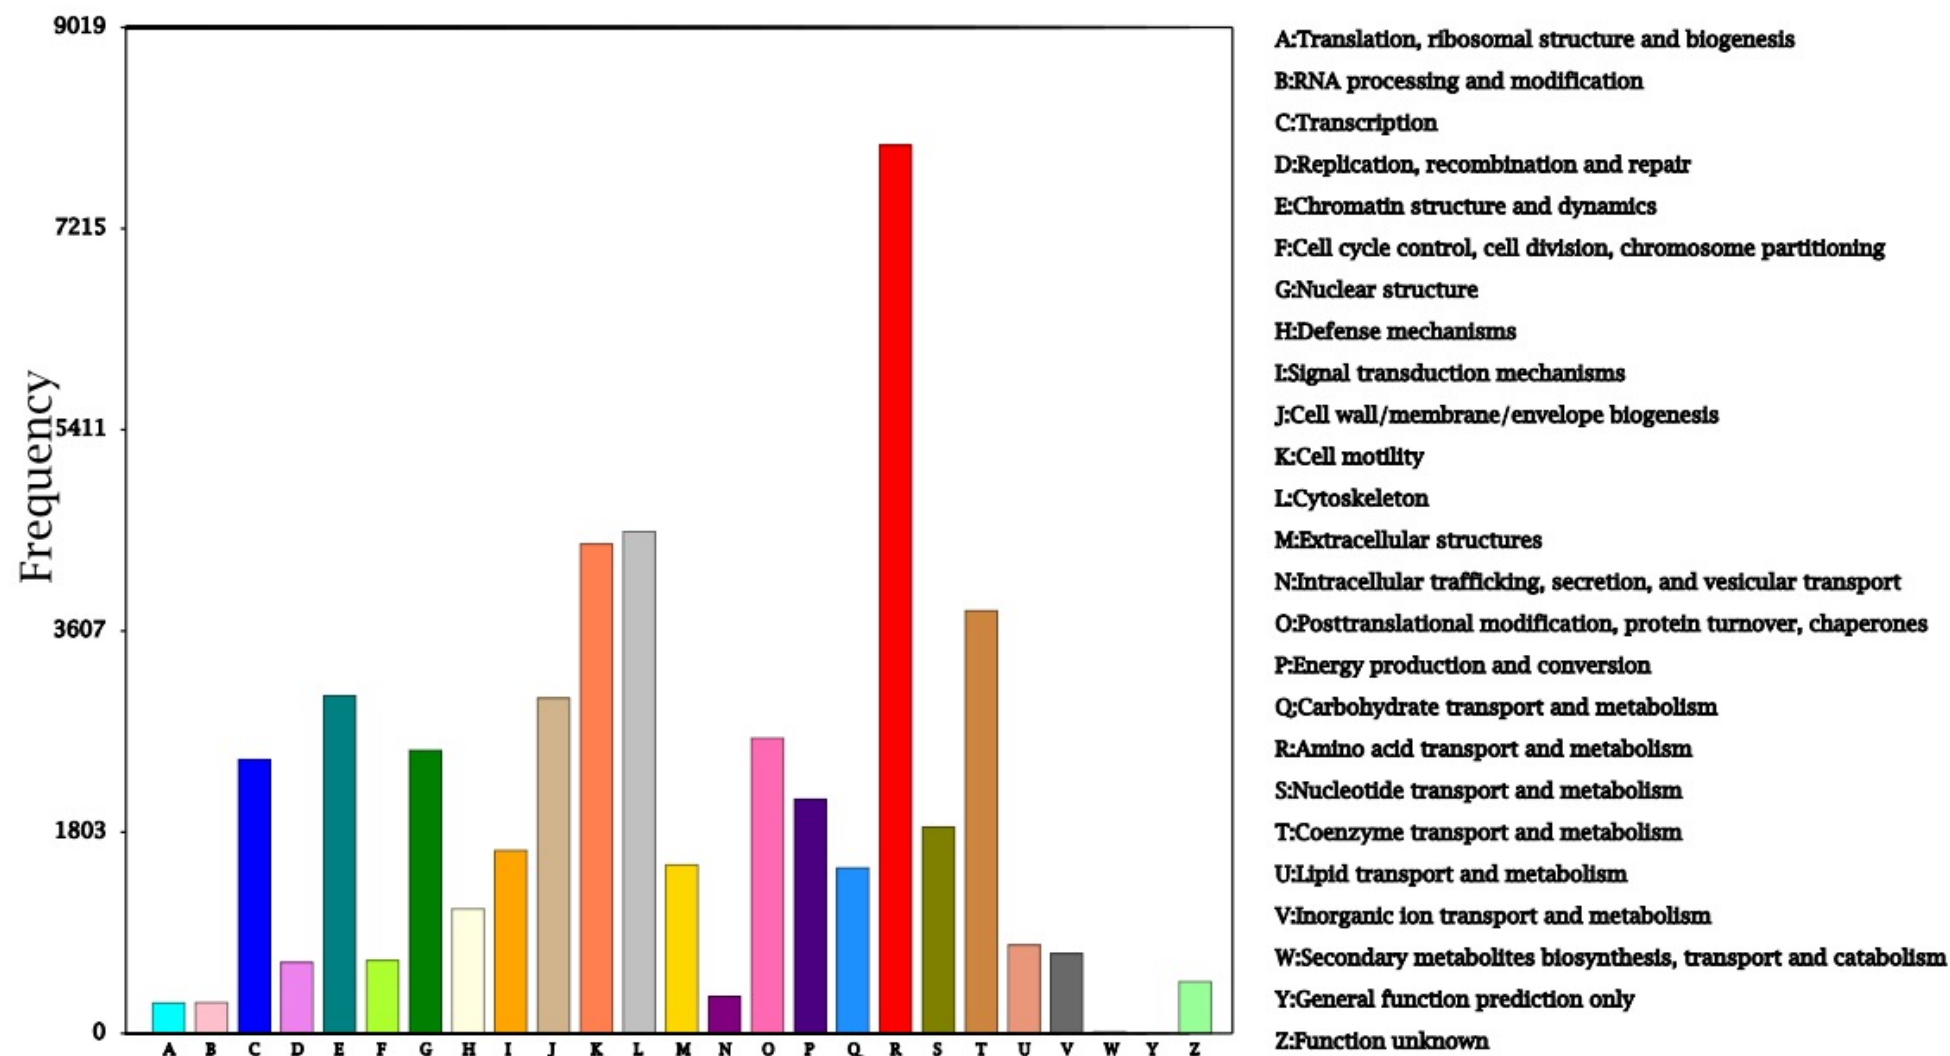

Figure S4

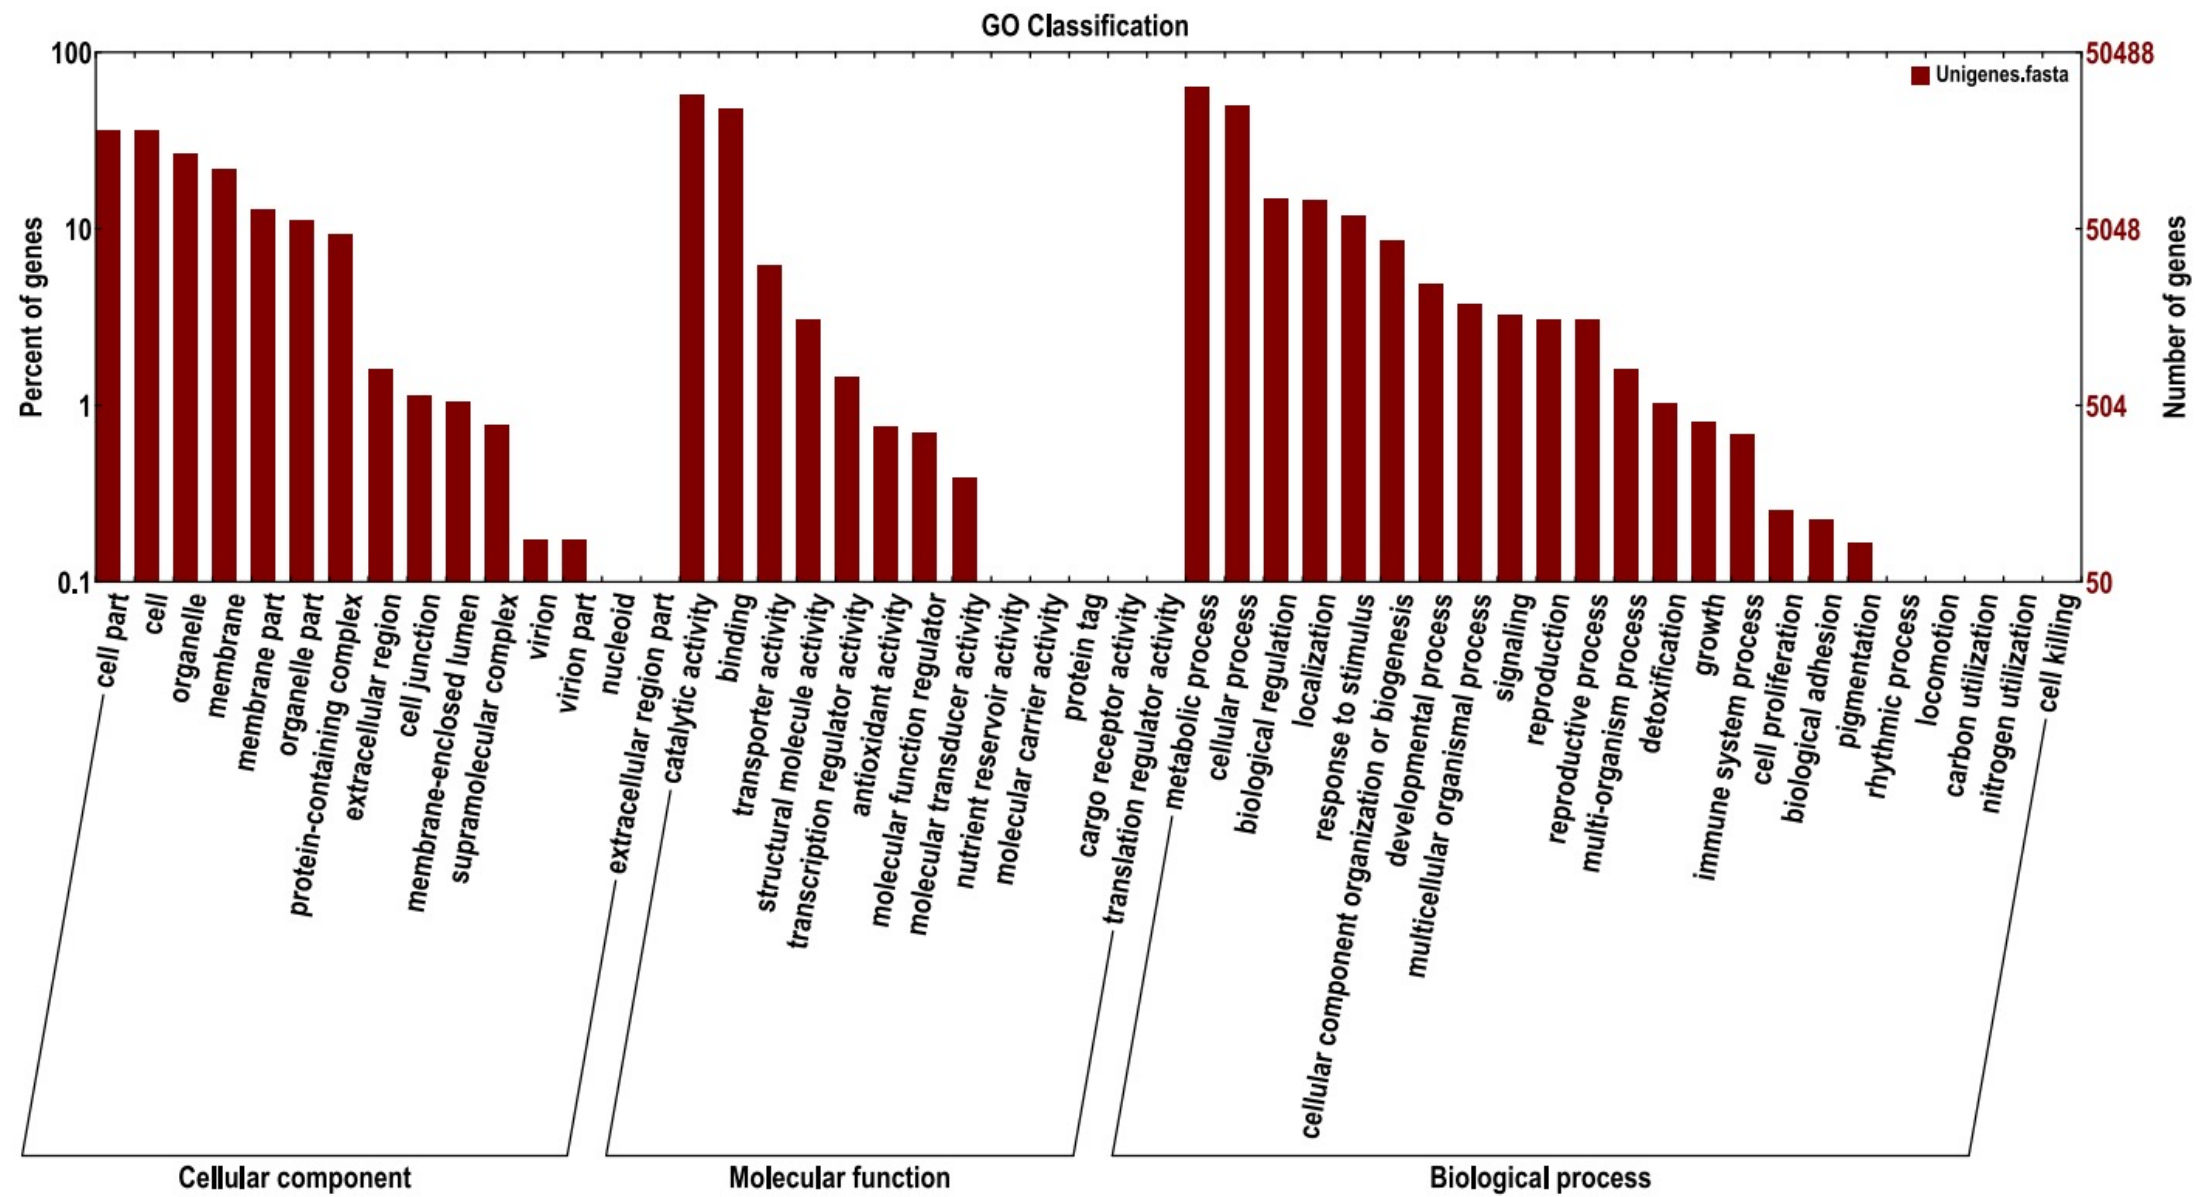

Figure S5

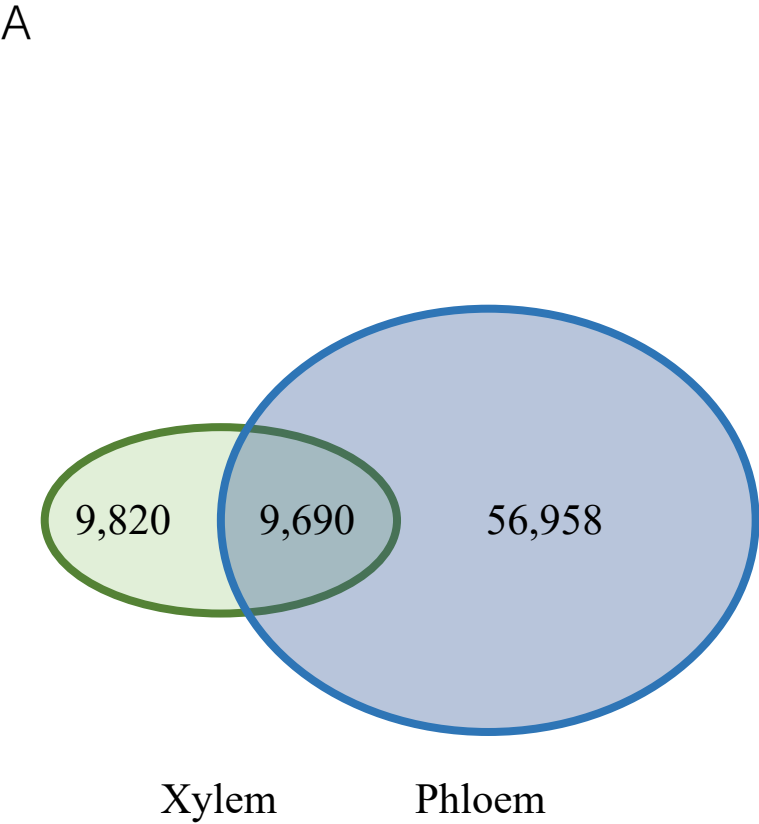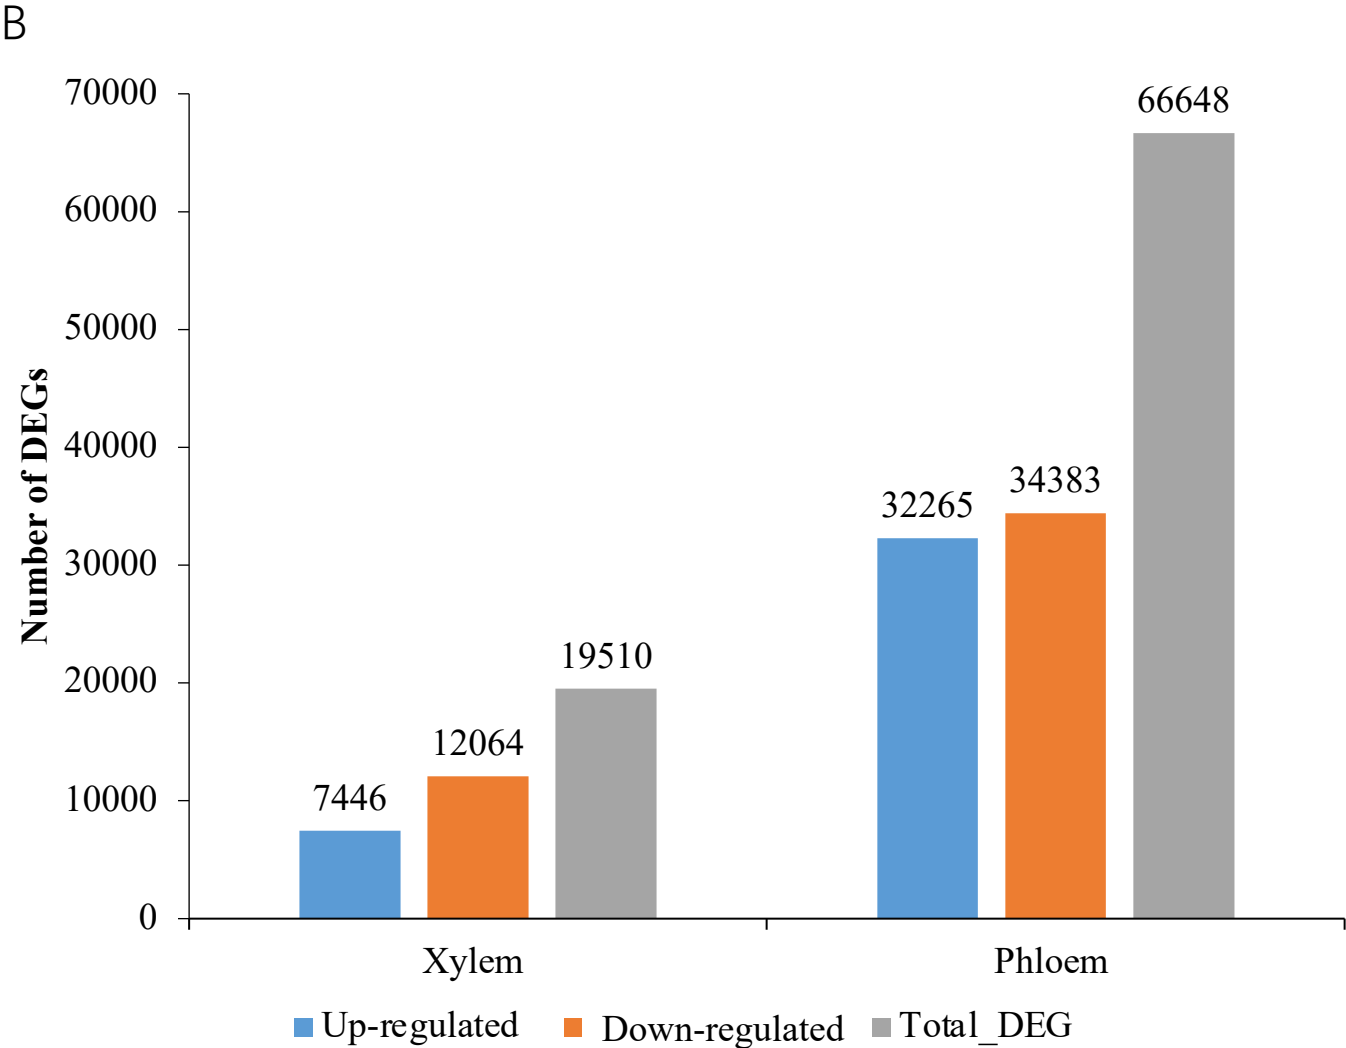

Figure S6

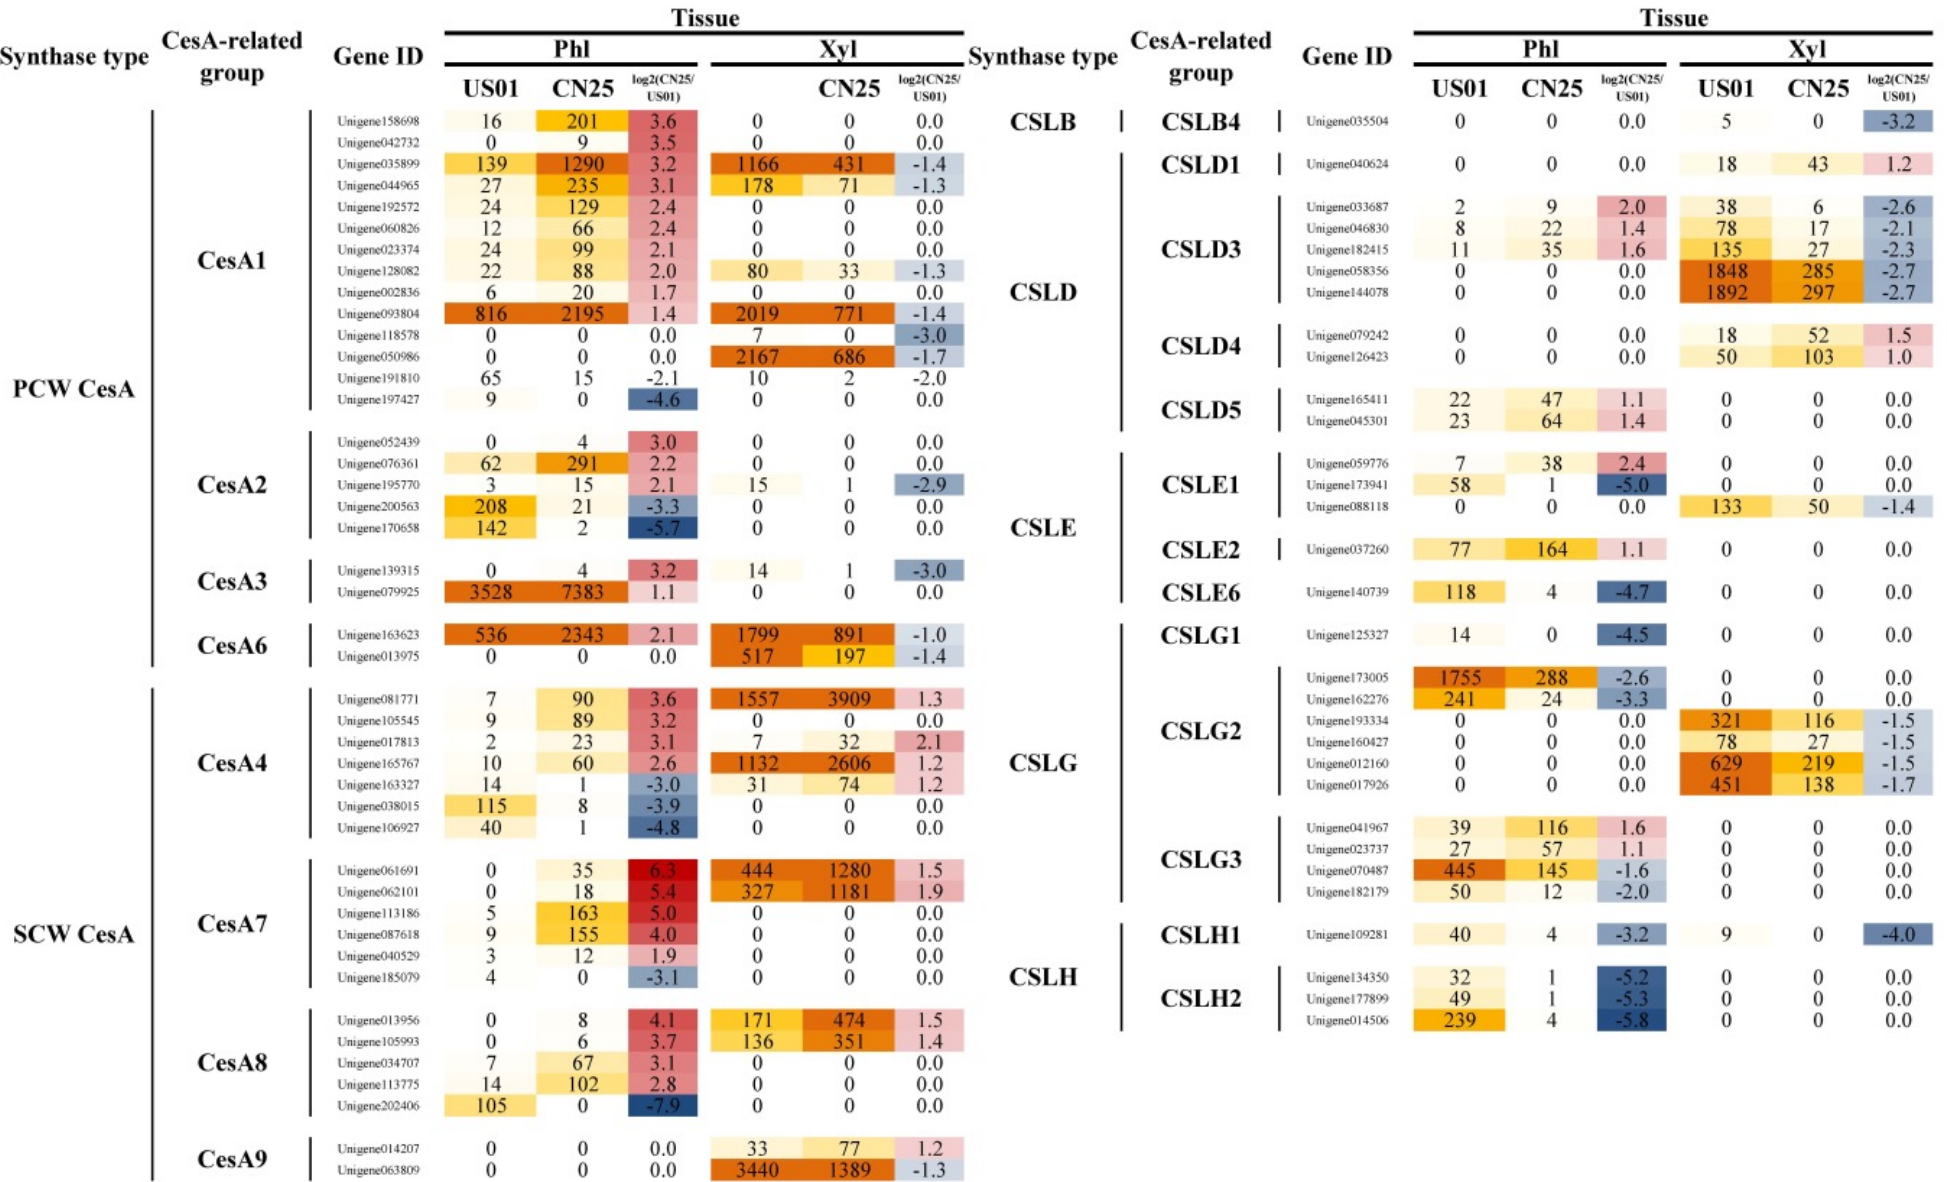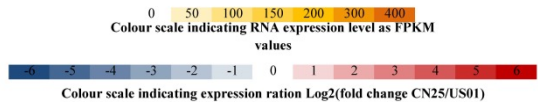

Supplement: s1 [file s1]
