# Supplementary material for: Tissue-Specific Transcriptomes in the Secondary Cell Wall Provide an Understanding of Stem Growth Enhancement in Solidago canadensis during Invasion
Source: Biology (Basel). 2023 Oct 20;12(10):1347. doi: 10.3390/biology12101347 (PMC10604605; doi:10.3390/biology12101347)
Supplement: Supplementary file 1 [file biology-12-01347-s001.zip › Supplementary Tables.xlsx]

## Sheet: Table S1
Table S1 Summary of RNA-sequencing data
#Sample	ReadSum	BaseSum	GC(%)	N(%)	Q20(%)	CycleQ20(%)	Q30(%)
T1-14-CK-P-1	26567814	7970344200	42.16	0	97.11	100	92.26
T1-14-CK-P-2	24794174	7438252200	42.43	0	97.24	100	92.36
T1-14-CK-P-3	26342083	7902624900	42.19	0	97.05	100	92.07
T1-14-CK-X-1	26460859	7938257700	44.95	0	96.88	100	91.54
T1-14-CK-X-2	22932464	6879739200	45	0	97.09	100	92.09
T1-14-CK-X-3	26613513	7984053900	44.93	0	97.59	100	93.09
YZT2-CK-P-1	27026500	8107950000	42.16	0	97.12	100	92.18
YZT2-CK-P-2	25632615	7689784500	42.27	0	97.53	100	93.08
YZT2-CK-P-3	24172248	7251674400	42.06	0	97.08	100	92.14
YZT2-CK-X-1	22941285	6882385500	42.44	0	96.8	100	91.36
YZT2-CK-X-2	21875046	6562513800	42.5	0	95.4	100	88.55
YZT2-CK-X-3	20777439	6233231700	42.41	0	97.54	100	92.97

## Sheet: Table S2
Table S2 Transcript assembly of RNA-seq reads by Trinity.
Length Range	Transcript	Unigene
300-500	205156(46.77%)	72606(46.26%)
500-1000	150593(34.33%)	55997(35.67%)
1000-2000	66603(15.19%)	22604(14.40%)
2000+	16253(3.71%)	5761(3.67%)
Total Number	438605	156968
Total Length	316521625	112835297
N50 Length	842	826
Mean Length	721.66	718.84

## Sheet: Table S3
Table S3 Fucntional annotation of unigenes in seven databases.
Annotated databases	Unigene	300bp≤Length<1000	Length≥1000bp
COG	34059	24673	9386
GO	38003	26633	11370
KEGG	20726	14958	5768
KOG	46563	32287	14276
Pfam	50707	33355	17352
Swiss-Prot	57418	39296	18122
nr	91541	67475	24066
All	95346	71045	24301

## Sheet: Table S4
Table S4 GO enrichment of DEGs bewteen US01 and CN25 in phloem.
GO.ID	Term	Annotated	Significant	Expected	KS
GO:0006468	protein phosphorylation	2499	940	873.97	7.9e-08
GO:0007018	microtubule-based movement	179	93	62.6	3.4e-06
GO:0000911	cytokinesis by cell plate formation	149	74	52.11	3.7e-05
GO:0045490	pectin catabolic process	92	49	32.18	3.9e-05
GO:0010075	regulation of meristem growth	198	90	69.25	8.4e-05
GO:0006270	DNA replication initiation	104	58	36.37	0.0001
GO:0009664	plant-type cell wall organization	250	107	87.43	0.00028
GO:0009809	lignin biosynthetic process	36	23	12.59	0.00032
GO:0048856	anatomical structure development	2557	930	894.26	0.0004
GO:0071555	cell wall organization	632	267	221.03	0.00051
GO:0009628	response to abiotic stimulus	1925	676	673.23	0.00058
GO:0007017	microtubule-based process	557	250	194.8	0.00064
GO:0071229	cellular response to acid chemical	429	157	150.03	0.00071
GO:0046482	para-aminobenzoic acid metabolic process	34	21	11.89	0.00074
GO:0008283	cell proliferation	193	85	67.5	0.00076
GO:0006306	DNA methylation	178	85	62.25	0.00077
GO:0007275	multicellular organismal development	2548	919	891.11	0.00093
GO:0009718	anthocyanin-containing compound biosynth...	36	22	12.59	0.00097
GO:0009555	pollen development	171	62	59.8	0.00097
GO:0006612	protein targeting to membrane	230	79	80.44	0.00128
GO:0006268	DNA unwinding involved in DNA replicatio...	28	18	9.79	0.00132
GO:0009832	plant-type cell wall biogenesis	143	67	50.01	0.00137
GO:0010033	response to organic substance	1733	613	606.08	0.0014
GO:0051258	protein polymerization	349	147	122.06	0.0014
GO:0042743	hydrogen peroxide metabolic process	263	100	91.98	0.00191
GO:0006885	regulation of pH	22	12	7.69	0.002
GO:0055114	oxidation-reduction process	5338	1879	1866.85	0.00205
GO:0042742	defense response to bacterium	219	92	76.59	0.00222
GO:0010264	myo-inositol hexakisphosphate biosynthet...	50	24	17.49	0.00226
GO:0051567	histone H3-K9 methylation	137	66	47.91	0.00228
GO:0042402	cellular biogenic amine catabolic proces...	89	47	31.13	0.00229
GO:0031408	oxylipin biosynthetic process	112	52	39.17	0.00274
GO:0010143	cutin biosynthetic process	14	10	4.9	0.00277
GO:0009813	flavonoid biosynthetic process	104	53	36.37	0.0035
GO:0007020	microtubule nucleation	79	39	27.63	0.00351
GO:0006913	nucleocytoplasmic transport	363	119	126.95	0.00386
GO:0019684	photosynthesis, light reaction	360	130	125.9	0.00421
GO:0009755	hormone-mediated signaling pathway	628	220	219.63	0.00422
GO:0045491	xylan metabolic process	124	59	43.37	0.00429
GO:0042430	indole-containing compound metabolic pro...	121	55	42.32	0.00455
GO:0019419	sulfate reduction	9	8	3.15	0.00457
GO:0008356	asymmetric cell division	30	18	10.49	0.00464
GO:0019217	regulation of fatty acid metabolic proce...	12	8	4.2	0.0047
GO:0006662	glycerol ether metabolic process	62	27	21.68	0.00476
GO:0005975	carbohydrate metabolic process	3724	1408	1302.39	0.00477
GO:0010256	endomembrane system organization	192	83	67.15	0.00481
GO:0000226	microtubule cytoskeleton organization	269	112	94.08	0.00506
GO:0051704	multi-organism process	1168	411	408.48	0.00534
GO:0009653	anatomical structure morphogenesis	1123	383	392.75	0.00571
GO:0005985	sucrose metabolic process	72	33	25.18	0.0058
GO:0015977	carbon fixation	80	38	27.98	0.00592
GO:0048439	flower morphogenesis	54	23	18.89	0.00594
GO:0003006	developmental process involved in reprod...	1424	499	498.01	0.00624
GO:0016567	protein ubiquitination	498	168	174.17	0.00626
GO:0018298	protein-chromophore linkage	121	55	42.32	0.00648
GO:0030243	cellulose metabolic process	262	108	91.63	0.00654
GO:0010363	regulation of plant-type hypersensitive ...	158	52	55.26	0.00657
GO:0051274	beta-glucan biosynthetic process	268	108	93.73	0.00697
GO:0006006	glucose metabolic process	697	264	243.76	0.00708
GO:0030154	cell differentiation	703	234	245.86	0.0072
GO:0015979	photosynthesis	569	217	199	0.0073
GO:0001101	response to acid chemical	827	302	289.23	0.00778
GO:0044724	single-organism carbohydrate catabolic p...	829	306	289.93	0.00799
GO:0009791	post-embryonic development	1528	537	534.39	0.00802
GO:0010337	regulation of salicylic acid metabolic p...	12	8	4.2	0.00857
GO:0008544	epidermis development	467	165	163.32	0.00892
GO:1901701	cellular response to oxygen-containing c...	764	261	267.19	0.00909
GO:0050790	regulation of catalytic activity	696	255	243.41	0.00939
GO:0048586	regulation of long-day photoperiodism, f...	9	6	3.15	0.00945
GO:0031365	N-terminal protein amino acid modificati...	132	51	46.16	0.00956
GO:0009909	regulation of flower development	284	114	99.32	0.00962
GO:0010065	primary meristem tissue development	8	6	2.8	0.01018
GO:0010067	procambium histogenesis	8	6	2.8	0.01018
GO:0016192	vesicle-mediated transport	1037	337	362.67	0.01025
GO:0043132	NAD transport	7	6	2.45	0.01028
GO:0009725	response to hormone	973	349	340.29	0.01035
GO:0018377	protein myristoylation	122	48	42.67	0.01048
GO:0006498	N-terminal protein lipidation	122	48	42.67	0.01048
GO:0006499	N-terminal protein myristoylation	122	48	42.67	0.01048
GO:0009314	response to radiation	877	310	306.71	0.01053
GO:0015743	malate transport	17	9	5.95	0.01061
GO:0006950	response to stress	3542	1251	1238.74	0.01082
GO:0010413	glucuronoxylan metabolic process	86	42	30.08	0.01113
GO:0009638	phototropism	14	9	4.9	0.01125
GO:0055075	potassium ion homeostasis	20	11	6.99	0.0116
GO:0019320	hexose catabolic process	390	156	136.39	0.01165
GO:0006007	glucose catabolic process	390	156	136.39	0.01165
GO:0009850	auxin metabolic process	64	31	22.38	0.01171
GO:0048193	Golgi vesicle transport	442	131	154.58	0.01191
GO:0040007	growth	660	248	230.82	0.01197
GO:1902593	single-organism nuclear import	213	79	74.49	0.01223
GO:0044744	protein targeting to nucleus	213	79	74.49	0.01223
GO:0051170	nuclear import	213	79	74.49	0.01223
GO:0006606	protein import into nucleus	213	79	74.49	0.01223
GO:0045492	xylan biosynthetic process	89	43	31.13	0.01224
GO:0046365	monosaccharide catabolic process	391	156	136.74	0.01237
GO:0016052	carbohydrate catabolic process	1041	408	364.07	0.0126
GO:0016049	cell growth	403	143	140.94	0.01262
GO:0044702	single organism reproductive process	1259	447	440.31	0.01317
GO:0071695	anatomical structure maturation	10	7	3.5	0.0132
GO:0009835	fruit ripening	10	7	3.5	0.0132
GO:0016572	histone phosphorylation	56	24	19.58	0.01321
GO:0019253	reductive pentose-phosphate cycle	45	21	15.74	0.01328
GO:0019685	photosynthesis, dark reaction	45	21	15.74	0.01328
GO:0006816	calcium ion transport	195	72	68.2	0.01361
GO:0009963	positive regulation of flavonoid biosynt...	24	13	8.39	0.01376
GO:0046351	disaccharide biosynthetic process	100	45	34.97	0.01422
GO:0044093	positive regulation of molecular functio...	353	131	123.45	0.01521
GO:0006568	tryptophan metabolic process	102	46	35.67	0.01522
GO:0006586	indolalkylamine metabolic process	102	46	35.67	0.01522
GO:0042546	cell wall biogenesis	244	114	85.33	0.01544
GO:0000280	nuclear division	391	140	136.74	0.016
GO:0006996	organelle organization	2884	967	1008.62	0.0161
GO:0042435	indole-containing compound biosynthetic ...	90	42	31.48	0.0164
GO:0034622	cellular macromolecular complex assembly	1070	386	374.21	0.0165
GO:0009962	regulation of flavonoid biosynthetic pro...	29	16	10.14	0.01652
GO:0009834	secondary cell wall biogenesis	32	18	11.19	0.01679
GO:0009607	response to biotic stimulus	807	293	282.23	0.01682
GO:0046777	protein autophosphorylation	121	49	42.32	0.01684
GO:0043543	protein acylation	180	66	62.95	0.01688
GO:0009851	auxin biosynthetic process	56	28	19.58	0.01691
GO:0006970	response to osmotic stress	486	180	169.97	0.01707
GO:0048285	organelle fission	428	151	149.68	0.01721
GO:0008361	regulation of cell size	58	27	20.28	0.01725
GO:0009416	response to light stimulus	834	295	291.67	0.01754
GO:0010605	negative regulation of macromolecule met...	576	224	201.44	0.01777
GO:0010092	specification of organ identity	9	6	3.15	0.01783
GO:0010093	specification of floral organ identity	9	6	3.15	0.01783
GO:0080093	regulation of photorespiration	9	6	3.15	0.01797
GO:0031998	regulation of fatty acid beta-oxidation	9	6	3.15	0.01797
GO:0046320	regulation of fatty acid oxidation	9	6	3.15	0.01797
GO:0050994	regulation of lipid catabolic process	9	6	3.15	0.01797
GO:0016458	gene silencing	450	177	157.38	0.01849
GO:0010817	regulation of hormone levels	290	109	101.42	0.0187
GO:0044092	negative regulation of molecular functio...	157	61	54.91	0.01871
GO:0046189	phenol-containing compound biosynthetic ...	94	33	32.87	0.01904
GO:0015791	polyol transport	12	6	4.2	0.0191
GO:0000272	polysaccharide catabolic process	232	108	81.14	0.01929
GO:0006342	chromatin silencing	200	81	69.95	0.01933
GO:0045814	negative regulation of gene expression, ...	200	81	69.95	0.01933
GO:0009411	response to UV	156	64	54.56	0.01952
GO:0070592	cell wall polysaccharide biosynthetic pr...	95	45	33.22	0.01993
GO:1902582	single-organism intracellular transport	1377	433	481.58	0.01997
GO:0043086	negative regulation of catalytic activit...	153	60	53.51	0.02007
GO:0030244	cellulose biosynthetic process	180	70	62.95	0.02073
GO:0048519	negative regulation of biological proces...	1066	389	372.81	0.02078
GO:0009697	salicylic acid biosynthetic process	90	32	31.48	0.02119
GO:0006598	polyamine catabolic process	37	21	12.94	0.02184
GO:0030004	cellular monovalent inorganic cation hom...	14	8	4.9	0.02187
GO:0009683	indoleacetic acid metabolic process	54	28	18.89	0.02189
GO:0009624	response to nematode	32	15	11.19	0.02231
GO:0043085	positive regulation of catalytic activit...	347	128	121.36	0.02321
GO:0010166	wax metabolic process	17	10	5.95	0.02331
GO:0048578	positive regulation of long-day photoper...	6	4	2.1	0.02355
GO:0006302	double-strand break repair	102	39	35.67	0.02419
GO:0010183	pollen tube guidance	13	9	4.55	0.02424
GO:0050918	positive chemotaxis	13	9	4.55	0.02424
GO:0001731	formation of translation preinitiation c...	77	31	26.93	0.02435
GO:0006073	cellular glucan metabolic process	726	282	253.9	0.02446
GO:0044042	glucan metabolic process	726	282	253.9	0.02446
GO:0032989	cellular component morphogenesis	448	161	156.68	0.02482
GO:0044264	cellular polysaccharide metabolic proces...	832	328	290.97	0.02485
GO:0090332	stomatal closure	14	8	4.9	0.02498
GO:0070589	cellular component macromolecule biosynt...	96	45	33.57	0.02558
GO:0044038	cell wall macromolecule biosynthetic pro...	96	45	33.57	0.02558
GO:0050665	hydrogen peroxide biosynthetic process	45	21	15.74	0.02567
GO:1903409	reactive oxygen species biosynthetic pro...	45	21	15.74	0.02567
GO:0090333	regulation of stomatal closure	6	5	2.1	0.0258
GO:0010629	negative regulation of gene expression	532	207	186.06	0.02584
GO:0009684	indoleacetic acid biosynthetic process	52	27	18.19	0.02598
GO:0043207	response to external biotic stimulus	756	270	264.4	0.0262
GO:0051707	response to other organism	756	270	264.4	0.0262
GO:0009251	glucan catabolic process	77	38	26.93	0.02636
GO:0044247	cellular polysaccharide catabolic proces...	77	38	26.93	0.02636
GO:0005976	polysaccharide metabolic process	1058	424	370.01	0.02648
GO:0009395	phospholipid catabolic process	6	5	2.1	0.02749
GO:0006405	RNA export from nucleus	123	40	43.02	0.0278
GO:0009892	negative regulation of metabolic process	615	237	215.08	0.02795
GO:0009957	epidermal cell fate specification	8	6	2.8	0.02796
GO:0052386	cell wall thickening	16	9	5.6	0.02796
GO:0052543	callose deposition in cell wall	16	9	5.6	0.02796
GO:0009751	response to salicylic acid	190	66	66.45	0.02958
GO:0009625	response to insect	33	18	11.54	0.02984
GO:0006733	oxidoreduction coenzyme metabolic proces...	416	155	145.49	0.02994
GO:0009737	response to abscisic acid	354	125	123.8	0.02997
GO:0032535	regulation of cellular component size	215	83	75.19	0.03059
GO:0090066	regulation of anatomical structure size	215	83	75.19	0.03059
GO:0060919	auxin influx	9	6	3.15	0.03127
GO:0010449	root meristem growth	10	6	3.5	0.0313
GO:0010082	regulation of root meristem growth	10	6	3.5	0.0313
GO:0022412	cellular process involved in reproductio...	119	34	41.62	0.03145
GO:0065003	macromolecular complex assembly	1166	416	407.78	0.03176
GO:0010024	phytochromobilin biosynthetic process	6	2	2.1	0.03219
GO:0051202	phytochromobilin metabolic process	6	2	2.1	0.03219
GO:0000003	reproduction	544	176	190.25	0.03234
GO:0007389	pattern specification process	247	90	86.38	0.03244
GO:0006101	citrate metabolic process	7	5	2.45	0.03268
GO:0009767	photosynthetic electron transport chain	81	35	28.33	0.03308
GO:0009074	aromatic amino acid family catabolic pro...	86	40	30.08	0.03379
GO:0044000	movement in host	7	5	2.45	0.03387
GO:0051814	movement in other organism involved in s...	7	5	2.45	0.03387
GO:0044766	multi-organism transport	7	5	2.45	0.03387
GO:1902586	multi-organism intercellular transport	7	5	2.45	0.03387
GO:0046794	transport of virus	7	5	2.45	0.03387
GO:0046740	transport of virus in host, cell to cell	7	5	2.45	0.03387
GO:0046739	transport of virus in multicellular host	7	5	2.45	0.03387
GO:0010346	shoot axis formation	20	9	6.99	0.03403
GO:0010223	secondary shoot formation	20	9	6.99	0.03403
GO:0001763	morphogenesis of a branching structure	20	9	6.99	0.03403
GO:0007030	Golgi organization	150	62	52.46	0.03434
GO:0009606	tropism	156	65	54.56	0.0354
GO:0007000	nucleolus organization	32	17	11.19	0.03545
GO:0006814	sodium ion transport	66	27	23.08	0.0357
GO:0030245	cellulose catabolic process	47	25	16.44	0.03578
GO:0051275	beta-glucan catabolic process	47	25	16.44	0.03578
GO:0009753	response to jasmonic acid	184	58	64.35	0.03627
GO:0043623	cellular protein complex assembly	802	296	280.48	0.03657
GO:0010155	regulation of proton transport	62	20	21.68	0.03657
GO:0006446	regulation of translational initiation	77	28	26.93	0.03663
GO:0042436	indole-containing compound catabolic pro...	52	26	18.19	0.03683
GO:0006569	tryptophan catabolic process	52	26	18.19	0.03683
GO:0046218	indolalkylamine catabolic process	52	26	18.19	0.03683
GO:0009698	phenylpropanoid metabolic process	210	94	73.44	0.03683
GO:0002238	response to molecule of fungal origin	19	9	6.64	0.03736
GO:0009735	response to cytokinin	95	35	33.22	0.03748
GO:0016042	lipid catabolic process	420	149	146.89	0.0381
GO:0032504	multicellular organism reproduction	281	82	98.27	0.03932
GO:0009956	radial pattern formation	19	9	6.64	0.03944
GO:0002213	defense response to insect	20	12	6.99	0.04072
GO:0034754	cellular hormone metabolic process	93	41	32.52	0.0411
GO:0009072	aromatic amino acid family metabolic pro...	341	141	119.26	0.04126
GO:0016043	cellular component organization	4484	1563	1568.19	0.04158
GO:0009567	double fertilization forming a zygote an...	12	6	4.2	0.04178
GO:0042445	hormone metabolic process	178	66	62.25	0.04185
GO:0051788	response to misfolded protein	167	60	58.4	0.0424
GO:0051276	chromosome organization	918	326	321.05	0.04249
GO:0030641	regulation of cellular pH	7	4	2.45	0.04294
GO:0051453	regulation of intracellular pH	7	4	2.45	0.04294
GO:0031146	SCF-dependent proteasomal ubiquitin-depe...	15	9	5.25	0.04306
GO:0071554	cell wall organization or biogenesis	868	373	303.56	0.04314
GO:0048863	stem cell differentiation	61	21	21.33	0.04353
GO:0071407	cellular response to organic cyclic comp...	355	125	124.15	0.04367
GO:0000724	double-strand break repair via homologou...	77	33	26.93	0.04372
GO:0000725	recombinational repair	77	33	26.93	0.04372
GO:0005991	trehalose metabolic process	81	36	28.33	0.04374
GO:0015798	myo-inositol transport	7	3	2.45	0.0441
GO:0030198	extracellular matrix organization	31	12	10.84	0.04422
GO:0071668	plant-type cell wall assembly	31	12	10.84	0.04422
GO:0043062	extracellular structure organization	31	12	10.84	0.04422
GO:0010215	cellulose microfibril organization	31	12	10.84	0.04422
GO:0006508	proteolysis	1795	616	627.76	0.04478
GO:0051051	negative regulation of transport	23	8	8.04	0.04479
GO:0000902	cell morphogenesis	425	154	148.63	0.04517
GO:1902589	single-organism organelle organization	1556	537	544.18	0.04526
GO:1902930	regulation of alcohol biosynthetic proce...	15	9	5.25	0.04555
GO:0043547	positive regulation of GTPase activity	96	41	33.57	0.0459
GO:0006425	glutaminyl-tRNA aminoacylation	16	9	5.6	0.04593
GO:1902221	erythrose 4-phosphate/phosphoenolpyruvat...	47	23	16.44	0.04599
GO:0006558	L-phenylalanine metabolic process	47	23	16.44	0.04599
GO:0072661	protein targeting to plasma membrane	7	5	2.45	0.04625
GO:0007292	female gamete generation	115	32	40.22	0.0463
GO:0016568	chromatin modification	564	214	197.25	0.0468
GO:0043090	amino acid import	56	21	19.58	0.04708
GO:0051784	negative regulation of nuclear division	20	8	6.99	0.04723
GO:0009566	fertilization	20	9	6.99	0.04753
GO:0033993	response to lipid	443	157	154.93	0.04756
GO:0009620	response to fungus	271	88	94.78	0.04773
GO:0042592	homeostatic process	559	202	195.5	0.04805
GO:0005992	trehalose biosynthetic process	73	32	25.53	0.04902
GO:0009855	determination of bilateral symmetry	86	35	30.08	0.04907
GO:0009719	response to endogenous stimulus	1051	370	367.57	0.0496
GO:0071446	cellular response to salicylic acid stim...	175	58	61.2	0.04967
GO:0009863	salicylic acid mediated signaling pathwa...	175	58	61.2	0.04967
GO:0007135	meiosis II	11	7	3.85	0.04973
GO:0045144	meiotic sister chromatid segregation	11	7	3.85	0.04973
GO:0051177	meiotic sister chromatid cohesion	11	7	3.85	0.04973

## Sheet: Table S5
Table S5 KEGG enrichment of DEGs bewteen US01 and CN25 in phloem.
pathway_id	ko	enrichment_factor	qvalue	gene_num
Starch and sucrose metabolism	ko00500	1.29	8.8252e-06	294
Sesquiterpenoid and triterpenoid biosynthesis	ko00909	1.7	0.00107094	45
Cutin, suberine and wax biosynthesis	ko00073	1.93	0.00594951	23
Phenylpropanoid biosynthesis	ko00940	1.24	0.00596026	184
Flavone and flavonol biosynthesis	ko00944	2.35	0.00996925	12
Flavonoid biosynthesis	ko00941	1.43	0.0184175	56
Circadian rhythm	ko04710	1.54	0.0321664	35

## Sheet: Table S6
Table S6 GO enrichment of DEGs bewteen US01 and CN25 in xylem.
GO.ID	Term	Annotated	Significant	Expected	KS
GO:0006412	translation	2327	504	336.68	2.2e-14
GO:0006468	protein phosphorylation	2499	405	361.56	4.3e-12
GO:0009800	cinnamic acid biosynthetic process	23	17	3.33	4.1e-09
GO:0055114	oxidation-reduction process	5338	964	772.31	9.6e-09
GO:0006559	L-phenylalanine catabolic process	28	18	4.05	4e-08
GO:0010363	regulation of plant-type hypersensitive ...	158	51	22.86	8.6e-08
GO:0010200	response to chitin	139	48	20.11	2.3e-07
GO:0009697	salicylic acid biosynthetic process	90	31	13.02	1.9e-06
GO:0031348	negative regulation of defense response	151	44	21.85	2.7e-06
GO:0006612	protein targeting to membrane	230	60	33.28	5.1e-06
GO:0031408	oxylipin biosynthetic process	112	38	16.2	5.6e-06
GO:0016567	protein ubiquitination	498	79	72.05	1.2e-05
GO:0050832	defense response to fungus	177	54	25.61	1.4e-05
GO:0018298	protein-chromophore linkage	121	42	17.51	2.4e-05
GO:0001101	response to acid chemical	827	180	119.65	2.6e-05
GO:0010310	regulation of hydrogen peroxide metaboli...	68	24	9.84	3e-05
GO:0009867	jasmonic acid mediated signaling pathway	125	36	18.09	8.8e-05
GO:0006888	ER to Golgi vesicle-mediated transport	166	26	24.02	0.0001
GO:0015671	oxygen transport	9	7	1.3	0.00011
GO:0009863	salicylic acid mediated signaling pathwa...	175	58	25.32	0.00013
GO:0009873	ethylene-activated signaling pathway	105	34	15.19	0.00013
GO:0009595	detection of biotic stimulus	40	15	5.79	0.00013
GO:0009862	systemic acquired resistance, salicylic ...	88	28	12.73	0.00014
GO:0009409	response to cold	299	49	43.26	0.00016
GO:0019722	calcium-mediated signaling	49	21	7.09	0.00016
GO:0009733	response to auxin	267	63	38.63	0.00023
GO:0010224	response to UV-B	51	20	7.38	0.00024
GO:0009809	lignin biosynthetic process	36	11	5.21	0.00045
GO:0048827	phyllome development	581	76	84.06	0.00051
GO:0008295	spermidine biosynthetic process	22	11	3.18	0.00052
GO:0006406	mRNA export from nucleus	106	16	15.34	0.00055
GO:0042752	regulation of circadian rhythm	36	14	5.21	0.0006
GO:0005992	trehalose biosynthetic process	73	22	10.56	0.00061
GO:0031537	regulation of anthocyanin metabolic proc...	24	12	3.47	0.00067
GO:0009664	plant-type cell wall organization	250	37	36.17	0.0007
GO:0006952	defense response	917	225	132.67	0.00073
GO:0030154	cell differentiation	703	77	101.71	0.00074
GO:0043069	negative regulation of programmed cell d...	94	29	13.6	0.00082
GO:0009693	ethylene biosynthetic process	49	19	7.09	0.00097
GO:0009755	hormone-mediated signaling pathway	628	151	90.86	0.00097
GO:0008219	cell death	279	79	40.37	0.00109
GO:0009653	anatomical structure morphogenesis	1123	140	162.48	0.0011
GO:0002238	response to molecule of fungal origin	19	9	2.75	0.00117
GO:0010103	stomatal complex morphogenesis	116	23	16.78	0.00121
GO:0000165	MAPK cascade	245	51	35.45	0.00129
GO:0043090	amino acid import	56	15	8.1	0.00147
GO:0009620	response to fungus	271	79	39.21	0.00156
GO:0006855	drug transmembrane transport	114	29	16.49	0.00162
GO:0042742	defense response to bacterium	219	44	31.69	0.00191
GO:0019684	photosynthesis, light reaction	360	70	52.09	0.00191
GO:0009853	photorespiration	191	44	27.63	0.00192
GO:0007275	multicellular organismal development	2548	359	368.65	0.00207
GO:0042128	nitrate assimilation	28	13	4.05	0.00208
GO:0045332	phospholipid translocation	52	11	7.52	0.00209
GO:0042218	1-aminocyclopropane-1-carboxylate biosyn...	9	6	1.3	0.00222
GO:0080129	proteasome core complex assembly	125	26	18.09	0.00229
GO:0009651	response to salt stress	392	62	56.72	0.0023
GO:0009617	response to bacterium	282	55	40.8	0.00238
GO:0048229	gametophyte development	351	43	50.78	0.00247
GO:2000038	regulation of stomatal complex developme...	8	6	1.16	0.00259
GO:0016114	terpenoid biosynthetic process	288	63	41.67	0.00264
GO:0009765	photosynthesis, light harvesting	94	27	13.6	0.00292
GO:0018106	peptidyl-histidine phosphorylation	56	19	8.1	0.00299
GO:0006970	response to osmotic stress	486	85	70.32	0.00304
GO:0050992	dimethylallyl diphosphate biosynthetic p...	9	6	1.3	0.00314
GO:0072488	ammonium transmembrane transport	26	10	3.76	0.00342
GO:0019432	triglyceride biosynthetic process	25	9	3.62	0.00356
GO:0009909	regulation of flower development	284	42	41.09	0.00367
GO:0005976	polysaccharide metabolic process	1058	171	153.07	0.00384
GO:0071215	cellular response to abscisic acid stimu...	195	46	28.21	0.00385
GO:0030244	cellulose biosynthetic process	180	40	26.04	0.00385
GO:0006979	response to oxidative stress	706	124	102.15	0.00418
GO:0009640	photomorphogenesis	209	32	30.24	0.00438
GO:0006464	cellular protein modification process	4693	686	678.99	0.00441
GO:0001510	RNA methylation	239	54	34.58	0.00447
GO:0010375	stomatal complex patterning	9	5	1.3	0.00452
GO:0009832	plant-type cell wall biogenesis	143	31	20.69	0.00454
GO:0052542	defense response by callose deposition	44	16	6.37	0.00457
GO:0006626	protein targeting to mitochondrion	142	34	20.54	0.00465
GO:0030071	regulation of mitotic metaphase/anaphase...	23	6	3.33	0.00474
GO:0006597	spermine biosynthetic process	13	7	1.88	0.00482
GO:0051788	response to misfolded protein	167	31	24.16	0.00486
GO:0010228	vegetative to reproductive phase transit...	321	34	46.44	0.0049
GO:0006629	lipid metabolic process	2661	452	385	0.00501
GO:0009793	embryo development ending in seed dorman...	347	40	50.2	0.00511
GO:0010152	pollen maturation	13	5	1.88	0.00554
GO:0044255	cellular lipid metabolic process	2008	326	290.52	0.00562
GO:0071554	cell wall organization or biogenesis	868	147	125.58	0.00608
GO:0009718	anthocyanin-containing compound biosynth...	36	12	5.21	0.00613
GO:0009808	lignin metabolic process	91	24	13.17	0.00679
GO:0009744	response to sucrose	127	32	18.37	0.00711
GO:0051093	negative regulation of developmental pro...	99	17	14.32	0.00715
GO:0003006	developmental process involved in reprod...	1424	192	206.03	0.00716
GO:0045229	external encapsulating structure organiz...	654	109	94.62	0.0072
GO:0016036	cellular response to phosphate starvatio...	63	11	9.11	0.00724
GO:0007276	gamete generation	136	10	19.68	0.00743
GO:0048193	Golgi vesicle transport	442	61	63.95	0.00751
GO:0044702	single organism reproductive process	1259	177	182.16	0.00804
GO:0010271	regulation of chlorophyll catabolic proc...	10	6	1.45	0.00819
GO:0034757	negative regulation of iron ion transpor...	10	6	1.45	0.00819
GO:0080117	secondary growth	10	6	1.45	0.00819
GO:0016558	protein import into peroxisome matrix	118	21	17.07	0.00843
GO:0048507	meristem development	442	68	63.95	0.0087
GO:0010229	inflorescence development	20	9	2.89	0.00874
GO:0008283	cell proliferation	193	17	27.92	0.00875
GO:0009628	response to abiotic stimulus	1925	301	278.51	0.00889
GO:0006635	fatty acid beta-oxidation	211	21	30.53	0.00912
GO:0048856	anatomical structure development	2557	334	369.95	0.00919
GO:0008544	epidermis development	467	68	67.57	0.00932
GO:0009646	response to absence of light	14	7	2.03	0.00943
GO:0048522	positive regulation of cellular process	710	71	102.72	0.00974
GO:0046271	phenylpropanoid catabolic process	54	12	7.81	0.01006
GO:0046274	lignin catabolic process	54	12	7.81	0.01006
GO:0036293	response to decreased oxygen levels	46	14	6.66	0.01023
GO:0001666	response to hypoxia	43	13	6.22	0.01046
GO:0071555	cell wall organization	632	105	91.44	0.01076
GO:0048767	root hair elongation	117	16	16.93	0.01112
GO:0009554	megasporogenesis	7	4	1.01	0.01115
GO:0016311	dephosphorylation	790	119	114.3	0.01134
GO:0009845	seed germination	157	25	22.72	0.0114
GO:0044723	single-organism carbohydrate metabolic p...	2436	372	352.45	0.01189
GO:0022412	cellular process involved in reproductio...	119	9	17.22	0.01194
GO:0009963	positive regulation of flavonoid biosynt...	24	9	3.47	0.01201
GO:0009893	positive regulation of metabolic process	505	63	73.06	0.01215
GO:1902589	single-organism organelle organization	1556	150	225.13	0.0122
GO:0009627	systemic acquired resistance	193	55	27.92	0.01239
GO:0006302	double-strand break repair	102	6	14.76	0.01248
GO:0044264	cellular polysaccharide metabolic proces...	832	145	120.38	0.01259
GO:1902593	single-organism nuclear import	213	29	30.82	0.01276
GO:0044744	protein targeting to nucleus	213	29	30.82	0.01276
GO:0051170	nuclear import	213	29	30.82	0.01276
GO:0006606	protein import into nucleus	213	29	30.82	0.01276
GO:0009737	response to abscisic acid	354	64	51.22	0.01292
GO:0009962	regulation of flavonoid biosynthetic pro...	29	11	4.2	0.01323
GO:0009913	epidermal cell differentiation	312	32	45.14	0.01327
GO:0030855	epithelial cell differentiation	312	32	45.14	0.01327
GO:0044707	single-multicellular organism process	2631	376	380.66	0.01335
GO:0080147	root hair cell development	123	17	17.8	0.01358
GO:0010817	regulation of hormone levels	290	42	41.96	0.01365
GO:0043288	apocarotenoid metabolic process	28	6	4.05	0.01386
GO:0016049	cell growth	403	47	58.31	0.01394
GO:0009749	response to glucose	61	14	8.83	0.01403
GO:0045338	farnesyl diphosphate metabolic process	29	11	4.2	0.01409
GO:0010876	lipid localization	259	49	37.47	0.01418
GO:0071365	cellular response to auxin stimulus	180	40	26.04	0.01429
GO:0071902	positive regulation of protein serine/th...	6	4	0.87	0.01432
GO:0000187	activation of MAPK activity	6	4	0.87	0.01432
GO:0043406	positive regulation of MAP kinase activi...	6	4	0.87	0.01432
GO:0006891	intra-Golgi vesicle-mediated transport	79	15	11.43	0.01442
GO:0006972	hyperosmotic response	134	31	19.39	0.0147
GO:0019287	isopentenyl diphosphate biosynthetic pro...	12	6	1.74	0.01471
GO:0009738	abscisic acid-activated signaling pathwa...	185	40	26.77	0.01477
GO:0007292	female gamete generation	115	9	16.64	0.01477
GO:0009555	pollen development	171	23	24.74	0.0148
GO:0015716	organic phosphonate transport	12	5	1.74	0.0152
GO:0006984	ER-nucleus signaling pathway	96	26	13.89	0.01536
GO:0070417	cellular response to cold	11	6	1.59	0.01539
GO:0071229	cellular response to acid chemical	429	117	62.07	0.01541
GO:0021700	developmental maturation	233	32	33.71	0.01556
GO:0009639	response to red or far red light	353	59	51.07	0.01561
GO:0015979	photosynthesis	569	115	82.32	0.01587
GO:0070646	protein modification by small protein re...	182	26	26.33	0.01596
GO:0018131	oxazole or thiazole biosynthetic process	13	4	1.88	0.01613
GO:0046484	oxazole or thiazole metabolic process	13	4	1.88	0.01613
GO:0052837	thiazole biosynthetic process	13	4	1.88	0.01613
GO:0052838	thiazole metabolic process	13	4	1.88	0.01613
GO:0046499	S-adenosylmethioninamine metabolic proce...	12	6	1.74	0.01619
GO:0006557	S-adenosylmethioninamine biosynthetic pr...	12	6	1.74	0.01619
GO:0048764	trichoblast maturation	211	24	30.53	0.01645
GO:0048765	root hair cell differentiation	211	24	30.53	0.01645
GO:0048469	cell maturation	211	24	30.53	0.01645
GO:0009908	flower development	744	104	107.64	0.01649
GO:0043289	apocarotenoid biosynthetic process	27	6	3.91	0.01652
GO:0009695	jasmonic acid biosynthetic process	95	22	13.74	0.01671
GO:0032261	purine nucleotide salvage	9	4	1.3	0.01686
GO:0032264	IMP salvage	9	4	1.3	0.01686
GO:0048513	organ development	1364	194	197.35	0.01686
GO:0015689	molybdate ion transport	19	6	2.75	0.0171
GO:0090351	seedling development	166	25	24.02	0.01713
GO:0009734	auxin-activated signaling pathway	179	40	25.9	0.01735
GO:0009561	megagametogenesis	142	11	20.54	0.01756
GO:0048583	regulation of response to stimulus	689	147	99.69	0.01778
GO:0009560	embryo sac egg cell differentiation	114	9	16.49	0.0178
GO:0048364	root development	374	44	54.11	0.01824
GO:0022622	root system development	374	44	54.11	0.01824
GO:0009553	embryo sac development	194	22	28.07	0.0183
GO:0010073	meristem maintenance	280	41	40.51	0.01891
GO:0043900	regulation of multi-organism process	86	20	12.44	0.01896
GO:0032501	multicellular organismal process	2705	379	391.37	0.01898
GO:0010496	intercellular transport	15	2	2.17	0.01905
GO:0006997	nucleus organization	93	9	13.46	0.01911
GO:0050790	regulation of catalytic activity	696	92	100.7	0.01911
GO:0034484	raffinose catabolic process	12	5	1.74	0.01918
GO:0042435	indole-containing compound biosynthetic ...	90	23	13.02	0.01959
GO:0012501	programmed cell death	234	67	33.86	0.01997
GO:0042545	cell wall modification	156	28	22.57	0.02011
GO:0048367	shoot system development	1037	148	150.04	0.02016
GO:0016571	histone methylation	291	26	42.1	0.02075
GO:0010029	regulation of seed germination	32	11	4.63	0.02077
GO:0009814	defense response, incompatible interacti...	248	66	35.88	0.02081
GO:0016052	carbohydrate catabolic process	1041	178	150.61	0.02092
GO:0010054	trichoblast differentiation	214	25	30.96	0.02098
GO:0006096	glycolytic process	429	85	62.07	0.0214
GO:0045087	innate immune response	447	109	64.67	0.02194
GO:0009687	abscisic acid metabolic process	27	6	3.91	0.02202
GO:1902644	tertiary alcohol metabolic process	27	6	3.91	0.02202
GO:0048569	post-embryonic organ development	516	69	74.66	0.02239
GO:0010218	response to far red light	88	14	12.73	0.02247
GO:0055129	L-proline biosynthetic process	8	2	1.16	0.02261
GO:0070482	response to oxygen levels	49	14	7.09	0.02268
GO:0043480	pigment accumulation in tissues	84	12	12.15	0.02279
GO:0043481	anthocyanin accumulation in tissues in r...	84	12	12.15	0.02279
GO:0043473	pigmentation	84	12	12.15	0.02279
GO:0043476	pigment accumulation	84	12	12.15	0.02279
GO:0043478	pigment accumulation in response to UV l...	84	12	12.15	0.02279
GO:0043479	pigment accumulation in tissues in respo...	84	12	12.15	0.02279
GO:0009637	response to blue light	110	18	15.92	0.02298
GO:0002679	respiratory burst involved in defense re...	28	10	4.05	0.02321
GO:0045730	respiratory burst	28	10	4.05	0.02321
GO:0048831	regulation of shoot system development	300	45	43.4	0.02332
GO:0009933	meristem structural organization	191	23	27.63	0.02359
GO:0048532	anatomical structure arrangement	191	23	27.63	0.02359
GO:0040007	growth	660	90	95.49	0.02406
GO:0007017	microtubule-based process	557	52	80.59	0.0242
GO:0006073	cellular glucan metabolic process	726	125	105.04	0.02432
GO:0044042	glucan metabolic process	726	125	105.04	0.02432
GO:0009753	response to jasmonic acid	184	53	26.62	0.02444
GO:0002376	immune system process	501	119	72.49	0.02463
GO:0006996	organelle organization	2884	290	417.26	0.02478
GO:0008610	lipid biosynthetic process	1590	267	230.05	0.02486
GO:0006342	chromatin silencing	200	22	28.94	0.02491
GO:0045814	negative regulation of gene expression, ...	200	22	28.94	0.02491
GO:0002237	response to molecule of bacterial origin	49	8	7.09	0.02532
GO:0016093	polyprenol metabolic process	13	1	1.88	0.02539
GO:0016094	polyprenol biosynthetic process	13	1	1.88	0.02539
GO:0019348	dolichol metabolic process	13	1	1.88	0.02539
GO:0019408	dolichol biosynthetic process	13	1	1.88	0.02539
GO:1902410	mitotic cytokinetic process	151	8	21.85	0.02585
GO:0000338	protein deneddylation	113	20	16.35	0.02599
GO:0065009	regulation of molecular function	741	96	107.21	0.02602
GO:0048588	developmental cell growth	187	20	27.06	0.02605
GO:0034969	histone arginine methylation	8	2	1.16	0.02605
GO:1901700	response to oxygen-containing compound	1510	283	218.47	0.0261
GO:0070647	protein modification by small protein co...	648	102	93.75	0.02623
GO:0009688	abscisic acid biosynthetic process	26	6	3.76	0.02649
GO:1902645	tertiary alcohol biosynthetic process	26	6	3.76	0.02649
GO:0009415	response to water	210	35	30.38	0.027
GO:0009414	response to water deprivation	197	34	28.5	0.02754
GO:0010941	regulation of cell death	204	66	29.52	0.02761
GO:0090567	reproductive shoot system development	758	109	109.67	0.02763
GO:0051273	beta-glucan metabolic process	350	59	50.64	0.02764
GO:0010207	photosystem II assembly	163	19	23.58	0.02787
GO:0010053	root epidermal cell differentiation	221	25	31.97	0.02801
GO:0006869	lipid transport	186	43	26.91	0.02801
GO:0006479	protein methylation	326	29	47.17	0.02804
GO:0008213	protein alkylation	326	29	47.17	0.02804
GO:0042538	hyperosmotic salinity response	54	17	7.81	0.02808
GO:0009838	abscission	22	5	3.18	0.02809
GO:0044036	cell wall macromolecule metabolic proces...	229	45	33.13	0.02816
GO:0019748	secondary metabolic process	570	105	82.47	0.02833
GO:0048589	developmental growth	484	60	70.03	0.02848
GO:0009404	toxin metabolic process	128	17	18.52	0.02936
GO:0009812	flavonoid metabolic process	125	40	18.09	0.02965
GO:0009416	response to light stimulus	834	132	120.67	0.03024
GO:0002683	negative regulation of immune system pro...	6	3	0.87	0.03026
GO:0048437	floral organ development	454	61	65.69	0.03031
GO:0043410	positive regulation of MAPK cascade	7	4	1.01	0.03037
GO:0006470	protein dephosphorylation	311	42	45	0.03072
GO:0051049	regulation of transport	191	33	27.63	0.031
GO:0007389	pattern specification process	247	38	35.74	0.03101
GO:0000281	mitotic cytokinesis	155	8	22.43	0.03106
GO:0006714	sesquiterpenoid metabolic process	44	7	6.37	0.03119
GO:0010015	root morphogenesis	289	39	41.81	0.03194
GO:0035383	thioester metabolic process	131	30	18.95	0.03215
GO:0006637	acyl-CoA metabolic process	131	30	18.95	0.03215
GO:0048438	floral whorl development	355	46	51.36	0.03256
GO:0030198	extracellular matrix organization	31	11	4.49	0.03274
GO:0071668	plant-type cell wall assembly	31	11	4.49	0.03274
GO:0043062	extracellular structure organization	31	11	4.49	0.03274
GO:0010215	cellulose microfibril organization	31	11	4.49	0.03274
GO:0000724	double-strand break repair via homologou...	77	5	11.14	0.03314
GO:0000725	recombinational repair	77	5	11.14	0.03314
GO:0048468	cell development	438	43	63.37	0.03314
GO:0046855	inositol phosphate dephosphorylation	15	5	2.17	0.03348
GO:0071545	inositol phosphate catabolic process	15	5	2.17	0.03348
GO:0033530	raffinose metabolic process	13	5	1.88	0.03375
GO:0046283	anthocyanin-containing compound metaboli...	57	24	8.25	0.03379
GO:0072330	monocarboxylic acid biosynthetic process	746	188	107.93	0.03403
GO:0071489	cellular response to red or far red ligh...	65	19	9.4	0.03444
GO:0010017	red or far-red light signaling pathway	65	19	9.4	0.03444
GO:0010337	regulation of salicylic acid metabolic p...	12	3	1.74	0.03445
GO:0015992	proton transport	619	101	89.56	0.03456
GO:0006818	hydrogen transport	619	101	89.56	0.03456
GO:0009411	response to UV	156	35	22.57	0.03491
GO:0043101	purine-containing compound salvage	27	7	3.91	0.03522
GO:0000226	microtubule cytoskeleton organization	269	23	38.92	0.03524
GO:0009145	purine nucleoside triphosphate biosynthe...	234	48	33.86	0.03536
GO:0009206	purine ribonucleoside triphosphate biosy...	234	48	33.86	0.03536
GO:0016106	sesquiterpenoid biosynthetic process	32	6	4.63	0.03569
GO:0043550	regulation of lipid kinase activity	7	4	1.01	0.03582
GO:0010118	stomatal movement	78	13	11.29	0.03615
GO:0000911	cytokinesis by cell plate formation	149	8	21.56	0.03633
GO:0006955	immune response	450	109	65.11	0.03651
GO:0048731	system development	1957	277	283.14	0.03689
GO:0010016	shoot system morphogenesis	310	46	44.85	0.03695
GO:0015696	ammonium transport	64	19	9.26	0.03721
GO:0009314	response to radiation	877	134	126.89	0.03737
GO:0010388	cullin deneddylation	111	18	16.06	0.03742
GO:0030968	endoplasmic reticulum unfolded protein r...	85	23	12.3	0.03814
GO:0046836	glycolipid transport	10	4	1.45	0.03857
GO:2000242	negative regulation of reproductive proc...	20	6	2.89	0.0387
GO:0010162	seed dormancy process	106	12	15.34	0.03888
GO:0022611	dormancy process	106	12	15.34	0.03888
GO:0009735	response to cytokinin	95	19	13.74	0.03952
GO:0009059	macromolecule biosynthetic process	6769	1080	979.36	0.04008
GO:0006631	fatty acid metabolic process	796	150	115.17	0.04023
GO:0009799	specification of symmetry	87	13	12.59	0.04039
GO:0031325	positive regulation of cellular metaboli...	470	50	68	0.04059
GO:0060560	developmental growth involved in morphog...	279	29	40.37	0.04062
GO:0040008	regulation of growth	285	45	41.23	0.04113
GO:0010048	vernalization response	80	13	11.57	0.04145
GO:0034620	cellular response to unfolded protein	86	23	12.44	0.04146
GO:0044724	single-organism carbohydrate catabolic p...	829	152	119.94	0.04263
GO:0015996	chlorophyll catabolic process	82	19	11.86	0.04321
GO:0046149	pigment catabolic process	82	19	11.86	0.04321
GO:0006754	ATP biosynthetic process	217	43	31.4	0.04325
GO:0010024	phytochromobilin biosynthetic process	6	1	0.87	0.04336
GO:0051202	phytochromobilin metabolic process	6	1	0.87	0.04336
GO:0010167	response to nitrate	76	14	11	0.04348
GO:0010227	floral organ abscission	17	5	2.46	0.04351
GO:0097305	response to alcohol	410	78	59.32	0.04469
GO:0048281	inflorescence morphogenesis	10	5	1.45	0.0447
GO:1901070	guanosine-containing compound biosynthet...	31	10	4.49	0.04472
GO:0071695	anatomical structure maturation	10	4	1.45	0.04556
GO:0009835	fruit ripening	10	4	1.45	0.04556
GO:0051347	positive regulation of transferase activ...	76	15	11	0.04576
GO:0071322	cellular response to carbohydrate stimul...	116	16	16.78	0.0458
GO:0006264	mitochondrial DNA replication	9	5	1.3	0.04586
GO:0090296	regulation of mitochondrial DNA replicat...	9	5	1.3	0.04586
GO:0010821	regulation of mitochondrion organization	9	5	1.3	0.04586
GO:0070407	oxidation-dependent protein catabolic pr...	9	5	1.3	0.04586
GO:1901858	regulation of mitochondrial DNA metaboli...	9	5	1.3	0.04586
GO:0033015	tetrapyrrole catabolic process	89	19	12.88	0.04596
GO:0006787	porphyrin-containing compound catabolic ...	89	19	12.88	0.04596
GO:0009694	jasmonic acid metabolic process	109	22	15.77	0.04675
GO:0098542	defense response to other organism	583	128	84.35	0.04682
GO:0043414	macromolecule methylation	648	87	93.75	0.04694
GO:0071462	cellular response to water stimulus	32	5	4.63	0.04698
GO:0042631	cellular response to water deprivation	32	5	4.63	0.04698
GO:0006446	regulation of translational initiation	77	13	11.14	0.04703
GO:0048863	stem cell differentiation	61	7	8.83	0.04714
GO:0000028	ribosomal small subunit assembly	20	7	2.89	0.04746
GO:0010256	endomembrane system organization	192	24	27.78	0.04787
GO:0033993	response to lipid	443	80	64.09	0.04815
GO:0006633	fatty acid biosynthetic process	469	106	67.86	0.04819
GO:0006301	postreplication repair	31	6	4.49	0.04865
GO:0008284	positive regulation of cell proliferatio...	42	3	6.08	0.04878
GO:0007030	Golgi organization	150	20	21.7	0.04903
GO:2000028	regulation of photoperiodism, flowering	11	3	1.59	0.04917
GO:0010065	primary meristem tissue development	8	4	1.16	0.04922
GO:0010067	procambium histogenesis	8	4	1.16	0.04922
GO:0006325	chromatin organization	705	67	102	0.0493
GO:0009896	positive regulation of catabolic process	11	3	1.59	0.04956
GO:0009791	post-embryonic development	1528	224	221.07	0.04958
GO:0043269	regulation of ion transport	142	28	20.54	0.0497
GO:0006084	acetyl-CoA metabolic process	107	23	15.48	0.04988

## Sheet: Table S7
Table S6 KEGG enrichment of DEGs bewteen US01 and CN25 in xylem.
pathway_id	ko	enrichment_factor	qvalue	gene_num
Ribosome	ko03010	1.9	0	401
Plant hormone signal transduction	ko04075	1.69	1.5174e-10	183
Phenylpropanoid biosynthesis	ko00940	1.85	6.06572e-10	116
Plant-pathogen interaction	ko04626	1.63	5.86455e-07	121
Biosynthesis of unsaturated fatty acids	ko01040	1.84	1.39683e-06	76
Terpenoid backbone biosynthesis	ko00900	1.78	4.57197e-06	76
Photosynthesis - antenna proteins	ko00196	2.52	1.86579e-05	29
Phenylalanine metabolism	ko00360	1.71	1.83882e-05	76
Photosynthesis	ko00195	1.92	4.53743e-05	49
Stilbenoid, diarylheptanoid and gingerol biosynthesis	ko00945	2.26	0.000214943	28
Flavone and flavonol biosynthesis	ko00944	4.17	0.000718629	9
Linoleic acid metabolism	ko00591	2.59	0.00205646	16
Flavonoid biosynthesis	ko00941	1.87	0.0032567	31
Circadian rhythm - plant	ko04712	1.84	0.00969319	27
MAPK signaling pathway - plant	ko04016	1.45	0.0105001	64
Diterpenoid biosynthesis	ko00904	1.92	0.0331719	18
Monoterpenoid biosynthesis	ko00902	2.25	0.0349621	12

## Sheet: Table S8
Table S8 DEGs related to plant hormone bewteen US01 and CN25 in phloem
#id	baseMeanA	baseMeanB	log2(YZT2-CK-P/T1-14-CK-P)	pvalue	padj	regulated	COG_class	COG_class_annotation	GO_annotation	KEGG_annotation	KOG_class	KOG_class_annotation	Pfam_annotation	Swissprot_annotation	nr_annotation
Auxin
AUX
Unigene199547	63.5678	26.8866	-1.22575	1.2277e-05	4.48401e-05	down	--	--	Cellular Component: integral component of membrane (GO:0016021);;	K13946|1e-145|vvi:100267240|AUX1, LAX;AUX1, LAX|hypothetical protein LOC100267240; K13946 auxin influx carrier (AUX1 LAX family)	[E]	Amino acid transport and metabolism	Transmembrane amino acid transporter protein	Auxin transporter-like protein 1 OS=Arabidopsis thaliana OX=3702 GN=LAX1 PE=2 SV=1	auxin transporter-like protein 2 [Lactuca sativa]
Unigene000896	9.44136	32.8646	1.75068	3.81389e-05	0.000128198	up	--	--	Cellular Component: integral component of membrane (GO:0016021);;	K13946|4e-67|rcu:RCOM_0592670|AUX1, LAX;AUX1, LAX|amino acid transporter, putative; K13946 auxin influx carrier (AUX1 LAX family)	[E]	Amino acid transport and metabolism	Transmembrane amino acid transporter protein;; Transmembrane amino acid transporter protein	Auxin transporter-like protein 1 OS=Medicago truncatula OX=3880 GN=LAX1 PE=2 SV=1	PREDICTED: auxin transporter-like protein 1 [Nicotiana sylvestris]
Unigene079985	3.27522	94.2984	4.68612	1.12173e-21	1.89571e-20	up	--	--	Cellular Component: membrane (GO:0016020);;	K13946|3e-25|pop:POPTR_653103|AUX1, LAX;AUX1, LAX|PtrAUX1; auxin influx carrier component; K13946 auxin influx carrier (AUX1 LAX family)	[E]	Amino acid transport and metabolism	Transmembrane amino acid transporter protein	Auxin transporter-like protein 2 OS=Medicago truncatula OX=3880 GN=LAX2 PE=2 SV=1	auxin transporter-like protein 2 [Helianthus annuus]
Unigene026338	0.378789	10.6359	3.85238	0.000307772	0.000879018	up	--	--	--	K13946|6e-32|pop:POPTR_576946|AUX1, LAX;AUX1, LAX|PtrAUX2; auxin influx carrier component; K13946 auxin influx carrier (AUX1 LAX family)	[E]	Amino acid transport and metabolism	--	Auxin transporter-like protein 2 OS=Medicago truncatula OX=3880 GN=LAX2 PE=2 SV=1	Amino acid transporter, transmembrane [Cynara cardunculus var. scolymus]
Unigene042336	34.6793	224.172	2.67781	6.66956e-43	2.79691e-41	up	--	--	Cellular Component: integral component of membrane (GO:0016021);;	K13946|1e-113|pop:POPTR_653103|AUX1, LAX;AUX1, LAX|PtrAUX1; auxin influx carrier component; K13946 auxin influx carrier (AUX1 LAX family)	[E]	Amino acid transport and metabolism	Transmembrane amino acid transporter protein	Auxin transporter-like protein 2 OS=Medicago truncatula OX=3880 GN=LAX2 PE=2 SV=1	auxin transporter-like protein 2 [Lactuca sativa]
Unigene046595	54.3742	296.628	2.4439	1.25997e-46	6.02597e-45	up	--	--	Cellular Component: integral component of membrane (GO:0016021);;	K13946|2e-23|rcu:RCOM_0592670|AUX1, LAX;AUX1, LAX|amino acid transporter, putative; K13946 auxin influx carrier (AUX1 LAX family)	[E]	Amino acid transport and metabolism	--	Auxin transporter-like protein 2 OS=Medicago truncatula OX=3880 GN=LAX2 PE=2 SV=1	hypothetical protein LSAT_5X147581 [Lactuca sativa]
Unigene132318	77.8244	402.179	2.36675	1.57403e-61	1.15481e-59	up	--	--	Cellular Component: integral component of membrane (GO:0016021);;	K13946|3e-82|pop:POPTR_653103|AUX1, LAX;AUX1, LAX|PtrAUX1; auxin influx carrier component; K13946 auxin influx carrier (AUX1 LAX family)	[E]	Amino acid transport and metabolism	Transmembrane amino acid transporter protein	Auxin transporter-like protein 2 OS=Medicago truncatula OX=3880 GN=LAX2 PE=2 SV=1	auxine transporter-like protein 2, partial [Medicago arabica]
Unigene046944	3.29592	18.1112	2.33415	0.000172453	0.000516355	up	--	--	Cellular Component: integral component of membrane (GO:0016021);;	K13946|3e-23|rcu:RCOM_0592670|AUX1, LAX;AUX1, LAX|amino acid transporter, putative; K13946 auxin influx carrier (AUX1 LAX family)	[E]	Amino acid transport and metabolism	Leucine Rich repeats (2 copies)	Auxin transporter-like protein 2 OS=Medicago truncatula OX=3880 GN=LAX2 PE=2 SV=1	auxin transporter-like protein 1 [Helianthus annuus]
Unigene200518	19.7949	84.6433	2.07181	7.1564e-12	5.88374e-11	up	--	--	Cellular Component: integral component of membrane (GO:0016021);;	K13946|2e-58|rcu:RCOM_1151110|AUX1, LAX;AUX1, LAX|amino acid transporter, putative; K13946 auxin influx carrier (AUX1 LAX family)	[E]	Amino acid transport and metabolism	Transmembrane amino acid transporter protein	Auxin transporter-like protein 2 OS=Medicago truncatula OX=3880 GN=LAX2 PE=2 SV=1	auxin transporter-like protein 2 [Helianthus annuus]
Unigene187997	43.5928	151.742	1.78443	2.15292e-16	2.60937e-15	up	--	--	Cellular Component: integral component of membrane (GO:0016021);;	K13946|0.0|vvi:100233126|AUX1, LAX;AUX1, LAX|LAX1; AUX-1-like protein; K13946 auxin influx carrier (AUX1 LAX family)	[E]	Amino acid transport and metabolism	Transmembrane amino acid transporter protein	Auxin transporter-like protein 2 OS=Medicago truncatula OX=3880 GN=LAX2 PE=2 SV=1	auxin transporter-like protein 2 isoform X2 [Helianthus annuus]
Unigene022368	330.786	905.014	1.45174	9.77468e-60	6.83112e-58	up	--	--	Biological Process: polysaccharide biosynthetic process (GO:0000271);; Biological Process: establishment of planar polarity (GO:0001736);; Biological Process: amino acid transmembrane transport (GO:0003333);; Cellular Component: endosome (GO:0005768);; Cellular Component: Golgi apparatus (GO:0005794);; Cellular Component: plasma membrane (GO:0005886);; Biological Process: syncytium formation (GO:…	K13946|1e-151|vvi:100233126|AUX1, LAX;AUX1, LAX|LAX1; AUX-1-like protein; K13946 auxin influx carrier (AUX1 LAX family)	[E]	Amino acid transport and metabolism	Transmembrane amino acid transporter protein;; Transmembrane amino acid transporter protein	Auxin transporter-like protein 2 OS=Medicago truncatula OX=3880 GN=LAX2 PE=2 SV=1	auxin transporter-like protein 2 [Lactuca sativa]
Unigene023767	12.0156	28.3128	1.20694	0.00380776	0.00864057	up	--	--	--	K13946|3e-43|osa:4338948|AUX1, LAX;AUX1, LAX|Os05g0447200; K13946 auxin influx carrier (AUX1 LAX family)	[E]	Amino acid transport and metabolism	--	Auxin transporter-like protein 2 OS=Oryza sativa subsp. japonica OX=39947 GN=Os05g0447200 PE=2 SV=1	auxin transporter-like protein 2 [Lactuca sativa]
Unigene048455	0	10.9131	4.65908	3.08755e-05	0.000105497	up	--	--	Biological Process: polysaccharide biosynthetic process (GO:0000271);; Biological Process: establishment of planar polarity (GO:0001736);; Biological Process: amino acid transmembrane transport (GO:0003333);; Cellular Component: endosome (GO:0005768);; Cellular Component: Golgi apparatus (GO:0005794);; Cellular Component: plasma membrane (GO:0005886);; Biological Process: syncytium formation (GO:…	K13946|7e-46|zma:100284071|AUX1, LAX;AUX1, LAX|si606065d12; LOC100284071; K13946 auxin influx carrier (AUX1 LAX family)	[E]	Amino acid transport and metabolism	--	Auxin transporter-like protein 4 OS=Medicago truncatula OX=3880 GN=LAX4 PE=2 SV=1	AUX-1-like protein, partial [Vitis vinifera]
Unigene090467	51.3549	262.737	2.34991	5.55654e-42	2.25577e-40	up	--	--	Cellular Component: integral component of membrane (GO:0016021);;	K13946|0.0|vvi:100253820|AUX1, LAX;AUX1, LAX|hypothetical protein LOC100253820; K13946 auxin influx carrier (AUX1 LAX family)	[E]	Amino acid transport and metabolism	Transmembrane amino acid transporter protein;; Transmembrane amino acid transporter protein	Auxin transporter-like protein 5 OS=Medicago truncatula OX=3880 GN=LAX5 PE=2 SV=1	auxin transporter-like protein 2 [Helianthus annuus]
Unigene097017	23.0425	83.2659	1.83395	5.16895e-10	3.45946e-09	up	--	--	Cellular Component: integral component of membrane (GO:0016021);;	K13946|0.0|vvi:100253820|AUX1, LAX;AUX1, LAX|hypothetical protein LOC100253820; K13946 auxin influx carrier (AUX1 LAX family)	[E]	Amino acid transport and metabolism	Transmembrane amino acid transporter protein	Auxin transporter-like protein 5 OS=Medicago truncatula OX=3880 GN=LAX5 PE=2 SV=1	auxin transporter-like protein 2 [Helianthus annuus]
TIR
Unigene033449	1.81941	23.977	3.45561	1.19477e-06	5.11115e-06	up	--	--	--	--	[R]	General function prediction only	--	Protein TRANSPORT INHIBITOR RESPONSE 1 OS=Arabidopsis thaliana OX=3702 GN=TIR1 PE=1 SV=2	protein TRANSPORT INHIBITOR RESPONSE 1-like [Helianthus annuus]
Unigene073958	12.3212	86.7603	2.768	7.22864e-17	9.05251e-16	up	--	--	--	K14485|5e-72|vvi:100263734|TIR1;TIR1|hypothetical protein LOC100263734	[R]	General function prediction only	F-box-like	Protein TRANSPORT INHIBITOR RESPONSE 1 OS=Arabidopsis thaliana OX=3702 GN=TIR1 PE=1 SV=2	transport inhibitor response 1-like protein Os04g0395600 [Lactuca sativa]
Unigene027051	45.2984	203.902	2.15976	7.20636e-32	2.00601e-30	up	--	--	Molecular Function: inositol hexakisphosphate binding (GO:0000822);; Biological Process: auxin-activated signaling pathway (GO:0009734);;	K14485|1e-140|vvi:100263734|TIR1;TIR1|hypothetical protein LOC100263734	[R]	General function prediction only	Leucine Rich repeats (2 copies);; F-box-like	Protein TRANSPORT INHIBITOR RESPONSE 1 OS=Arabidopsis thaliana OX=3702 GN=TIR1 PE=1 SV=2	transport inhibitor response 1-like protein Os04g0395600 [Lactuca sativa]
Unigene048933	34.5393	121.381	1.8049	4.053e-15	4.45932e-14	up	--	--	--	K14485|1e-149|vvi:100263734|TIR1;TIR1|hypothetical protein LOC100263734	[R]	General function prediction only	Leucine Rich repeats (2 copies)	Protein TRANSPORT INHIBITOR RESPONSE 1 OS=Arabidopsis thaliana OX=3702 GN=TIR1 PE=1 SV=2	putative F-box domain, Leucine-rich repeat domain, L domain-like protein [Helianthus annuus]
Unigene067324	32.922	78.3956	1.24193	1.22583e-06	5.23574e-06	up	--	--	Molecular Function: inositol hexakisphosphate binding (GO:0000822);; Molecular Function: ubiquitin-protein transferase activity (GO:0004842);; Cellular Component: nucleus (GO:0005634);; Biological Process: ubiquitin-dependent protein catabolic process (GO:0006511);; Biological Process: defense response (GO:0006952);; Biological Process: cell cycle (GO:0007049);; Biological Process: auxin-activate…	K14485|1e-124|rcu:RCOM_0556140|TIR1;TIR1|TRANSPORT INHIBITOR RESPONSE 1 protein, putative; K14485 transport inhibitor response 1	[R]	General function prediction only	F-box-like;; F-box domain	Protein TRANSPORT INHIBITOR RESPONSE 1 OS=Arabidopsis thaliana OX=3702 GN=TIR1 PE=1 SV=2	protein TRANSPORT INHIBITOR RESPONSE 1-like [Helianthus annuus]
Unigene092446	154.774	326.083	1.07186	2.61575e-16	3.15057e-15	up	--	--	--	K14485|0.0|vvi:100263734|TIR1;TIR1|hypothetical protein LOC100263734	[R]	General function prediction only	Leucine Rich repeats (2 copies);; Leucine Rich repeat	Protein TRANSPORT INHIBITOR RESPONSE 1 OS=Arabidopsis thaliana OX=3702 GN=TIR1 PE=1 SV=2	putative F-box domain, Leucine-rich repeat domain, L domain-like protein [Helianthus annuus]
Unigene190601	114.547	19.8923	-2.50433	8.05472e-23	1.45318e-21	down	--	--	--	--	[R]	General function prediction only	--	Protein TRANSPORT INHIBITOR RESPONSE 1 OS=Arabidopsis thaliana OX=3702 GN=TIR1 PE=1 SV=2	protein TRANSPORT INHIBITOR RESPONSE 1-like [Helianthus annuus]
Unigene033131	17.5001	119.03	2.73634	4.66428e-23	8.51618e-22	up	--	--	Molecular Function: inositol hexakisphosphate binding (GO:0000822);; Biological Process: auxin-activated signaling pathway (GO:0009734);;	--	[R]	General function prediction only	--	Transport inhibitor response 1-like protein OS=Arabidopsis thaliana OX=3702 GN=At5g49980 PE=2 SV=1	transport inhibitor response 1-like protein [Helianthus annuus]
Unigene171320	33.1414	86.0634	1.3707	1.1098e-07	5.52105e-07	up	--	--	Molecular Function: inositol hexakisphosphate binding (GO:0000822);; Biological Process: auxin-activated signaling pathway (GO:0009734);;	--	[R]	General function prediction only	--	Transport inhibitor response 1-like protein OS=Arabidopsis thaliana OX=3702 GN=At5g49980 PE=2 SV=1	transport inhibitor response 1-like protein [Helianthus annuus]
Unigene058873	81.0417	205.419	1.34036	2.29516e-16	2.77611e-15	up	--	--	--	--	[R]	General function prediction only	--	Transport inhibitor response 1-like protein Os04g0395600 OS=Oryza sativa subsp. japonica OX=39947 GN=Os04g0395600 PE=2 SV=1	transport inhibitor response 1-like protein Os04g0395600 [Lactuca sativa]
Unigene131422	150.51	35.7678	-2.06172	4.65944e-20	7.1826e-19	down	--	--	--	--	[R]	General function prediction only	--	Transport inhibitor response 1-like protein Os04g0395600 OS=Oryza sativa subsp. japonica OX=39947 GN=Os04g0395600 PE=2 SV=1	hypothetical protein Ccrd_000972 [Cynara cardunculus var. scolymus]
Unigene152317	105.296	16.3815	-2.6555	7.02412e-21	1.13696e-19	down	--	--	--	K14485|2e-14|vvi:100263734|TIR1;TIR1|hypothetical protein LOC100263734	[R]	General function prediction only	--	Transport inhibitor response 1-like protein Os04g0395600 OS=Oryza sativa subsp. japonica OX=39947 GN=Os04g0395600 PE=2 SV=1	protein TRANSPORT INHIBITOR RESPONSE 1-like [Helianthus annuus]
Unigene179883	29.2983	0.282239	-5.54511	4.43569e-09	2.64996e-08	down	--	--	--	--	--	--	--	Transport inhibitor response 1-like protein Os04g0395600 OS=Oryza sativa subsp. japonica OX=39947 GN=Os04g0395600 PE=2 SV=1	hypothetical protein LSAT_4X56881 [Lactuca sativa]
AUX/IAA
Unigene058173	11.6106	38.5289	1.69058	1.85686e-05	6.58617e-05	up	--	--	Cellular Component: nucleus (GO:0005634);; Biological Process: regulation of transcription, DNA-templated (GO:0006355);; Biological Process: auxin-activated signaling pathway (GO:0009734);; Molecular Function: protein dimerization activity (GO:0046983);;	K14484|1e-18|ath:AT1G04240|IAA;IAA|SHY2; SHY2 (SHORT HYPOCOTYL 2); transcription factor; K14484 auxin-responsive protein IAA	--	--	--	Auxin-responsive protein IAA3 OS=Arabidopsis thaliana OX=3702 GN=IAA3 PE=1 SV=1	hypothetical protein Ccrd_024984 [Cynara cardunculus var. scolymus]
Unigene142629	80.1392	165.365	1.0429	3.47509e-10	2.37134e-09	up	--	--	Cellular Component: nucleus (GO:0005634);; Biological Process: regulation of transcription, DNA-templated (GO:0006355);; Biological Process: auxin-activated signaling pathway (GO:0009734);; Molecular Function: protein dimerization activity (GO:0046983);;	--	--	--	--	Auxin-responsive protein IAA3 OS=Arabidopsis thaliana OX=3702 GN=IAA3 PE=1 SV=1	auxin-induced protein 22D [Lactuca sativa]
Unigene188975	12.0763	3.50172	-1.67015	0.0155873	0.0304654	down	--	--	--	K14484|8e-06|ath:AT1G04240|IAA;IAA|SHY2; SHY2 (SHORT HYPOCOTYL 2); transcription factor; K14484 auxin-responsive protein IAA	--	--	--	Auxin-responsive protein IAA3 OS=Arabidopsis thaliana OX=3702 GN=IAA3 PE=1 SV=1	auxin-induced protein 22D-like [Lactuca sativa]
Unigene167982	7.00652	20.0215	1.47148	0.00490663	0.0108637	up	--	--	Cellular Component: nucleus (GO:0005634);; Biological Process: regulation of transcription, DNA-templated (GO:0006355);; Biological Process: auxin-activated signaling pathway (GO:0009734);; Molecular Function: protein dimerization activity (GO:0046983);;	--	--	--	AUX/IAA family	Auxin-responsive protein IAA3 OS=Oryza sativa subsp. japonica OX=39947 GN=IAA3 PE=2 SV=1	auxin-responsive protein IAA16-like [Helianthus annuus]
Unigene159998	11.3436	0.305389	-4.21153	6.12936e-05	0.000198691	down	--	--	--	--	--	--	--	Auxin-responsive protein IAA7 OS=Arabidopsis thaliana OX=3702 GN=IAA7 PE=1 SV=1	--
Unigene203848	167.283	26.432	-2.64914	1.60147e-32	4.55686e-31	down	--	--	Cellular Component: nucleus (GO:0005634);; Biological Process: regulation of transcription, DNA-templated (GO:0006355);; Biological Process: auxin-activated signaling pathway (GO:0009734);; Molecular Function: protein dimerization activity (GO:0046983);;	--	--	--	--	Auxin-responsive protein IAA8 OS=Arabidopsis thaliana OX=3702 GN=IAA8 PE=1 SV=1	Aux/IAA-ARF-dimerization, partial [Cynara cardunculus var. scolymus]
Unigene187186	36.3717	0.29132	-5.82982	3.95592e-10	2.68334e-09	down	--	--	Cellular Component: nucleus (GO:0005634);; Biological Process: regulation of transcription, DNA-templated (GO:0006355);; Biological Process: auxin-activated signaling pathway (GO:0009734);; Molecular Function: protein dimerization activity (GO:0046983);;	--	--	--	--	Auxin-responsive protein IAA8 OS=Arabidopsis thaliana OX=3702 GN=IAA8 PE=1 SV=1	auxin-responsive protein IAA9-like [Helianthus annuus]
Unigene045837	59.7261	173.241	1.53222	5.01848e-18	6.80536e-17	up	--	--	Biological Process: transcription, DNA-templated (GO:0006351);; Biological Process: regulation of cellular process (GO:0050794);;	--	--	--	AUX/IAA family	Auxin-responsive protein IAA9 OS=Arabidopsis thaliana OX=3702 GN=IAA9 PE=1 SV=1	Aux/IAA-ARF-dimerization [Cynara cardunculus var. scolymus]
Unigene097779	50.3544	114.321	1.17397	2.35559e-08	1.28391e-07	up	--	--	Biological Process: transcription, DNA-templated (GO:0006351);; Biological Process: regulation of cellular process (GO:0050794);;	--	--	--	AUX/IAA family	Auxin-responsive protein IAA9 OS=Arabidopsis thaliana OX=3702 GN=IAA9 PE=1 SV=1	Aux/IAA-ARF-dimerization [Cynara cardunculus var. scolymus]
Unigene022387	42.4572	142.528	1.73794	2.77011e-17	3.57278e-16	up	--	--	--	--	--	--	AUX/IAA family	Auxin-responsive protein IAA12 OS=Arabidopsis thaliana OX=3702 GN=IAA12 PE=1 SV=1	auxin-responsive protein IAA12-like [Lactuca sativa]
Unigene091305	0	5.23647	3.49867	0.00505226	0.0111545	up	--	--	Biological Process: RNA splicing, via endonucleolytic cleavage and ligation (GO:0000394);; Molecular Function: protein binding (GO:0005515);; Biological Process: methionine biosynthetic process (GO:0009086);; Biological Process: response to auxin (GO:0009733);;	K14484|8e-12|ath:AT2G33310|IAA;IAA|IAA13; IAA13; transcription factor	--	--	--	Auxin-responsive protein IAA13 OS=Arabidopsis thaliana OX=3702 GN=IAA13 PE=1 SV=2	Aux/IAA-ARF-dimerization [Cynara cardunculus var. scolymus]
Unigene049945	87.5127	353.331	2.00542	3.60498e-46	1.69097e-44	up	--	--	--	K14484|1e-43|vvi:100244630|IAA;IAA|hypothetical protein LOC100244630	--	--	AUX/IAA family	Auxin-responsive protein IAA13 OS=Arabidopsis thaliana OX=3702 GN=IAA13 PE=1 SV=2	auxin-responsive protein IAA13-like [Helianthus annuus]
Unigene083136	27.7169	111.403	1.98938	7.06236e-15	7.59679e-14	up	--	--	--	K14484|1e-23|vvi:100244630|IAA;IAA|hypothetical protein LOC100244630	--	--	AUX/IAA family	Auxin-responsive protein IAA13 OS=Arabidopsis thaliana OX=3702 GN=IAA13 PE=1 SV=2	auxin-responsive protein IAA13-like [Helianthus annuus]
Unigene024987	159.073	484.184	1.6041	1.86955e-47	9.13513e-46	up	--	--	Cellular Component: nucleus (GO:0005634);; Biological Process: regulation of transcription, DNA-templated (GO:0006355);; Biological Process: auxin-activated signaling pathway (GO:0009734);; Molecular Function: protein dimerization activity (GO:0046983);;	--	--	--	AUX/IAA family	Auxin-responsive protein IAA13 OS=Arabidopsis thaliana OX=3702 GN=IAA13 PE=1 SV=2	auxin-responsive protein IAA13 [Helianthus annuus]
Unigene144492	4.79038	0	-3.56059	0.00521723	0.0114792	down	--	--	Cellular Component: nucleus (GO:0005634);; Biological Process: regulation of transcription, DNA-templated (GO:0006355);; Biological Process: auxin-activated signaling pathway (GO:0009734);; Molecular Function: protein dimerization activity (GO:0046983);;	K14484|7e-13|ath:AT2G33310|IAA;IAA|IAA13; IAA13; transcription factor	--	--	--	Auxin-responsive protein IAA13 OS=Arabidopsis thaliana OX=3702 GN=IAA13 PE=1 SV=2	hypothetical protein LSAT_1X75561 [Lactuca sativa]
Unigene117155	17.4214	0.573559	-4.27735	1.80555e-06	7.51344e-06	down	--	--	--	K14484|3e-10|ath:AT2G33310|IAA;IAA|IAA13; IAA13; transcription factor	--	--	--	Auxin-responsive protein IAA13 OS=Arabidopsis thaliana OX=3702 GN=IAA13 PE=1 SV=2	indole-3-acetic acid inducible 12, partial [Chrysanthemum x morifolium]
Unigene143582	119.903	0.864879	-6.58125	8.87967e-22	1.50992e-20	down	--	--	--	K14484|3e-13|vvi:100256286|IAA;IAA|hypothetical protein LOC100256286	--	--	AUX/IAA family	Auxin-responsive protein IAA13 OS=Arabidopsis thaliana OX=3702 GN=IAA13 PE=1 SV=2	auxin-responsive protein IAA13-like [Helianthus annuus]
Unigene069192	3.65677	67.4812	4.07145	1.01069e-16	1.25294e-15	up	--	--	--	--	--	--	--	Auxin-responsive protein IAA16 OS=Arabidopsis thaliana OX=3702 GN=IAA16 PE=1 SV=1	indoleacetic acid-induced-like protein, partial [Helianthus annuus]
Unigene024967	80.0895	914.865	3.508	6.24057e-185	2.98558e-182	up	--	--	Biological Process: cellular process (GO:0009987);;	--	--	--	AUX/IAA family	Auxin-responsive protein IAA16 OS=Arabidopsis thaliana OX=3702 GN=IAA16 PE=1 SV=1	auxin-responsive protein IAA16-like [Lactuca sativa]
Unigene055987	0.360846	12.2168	4.0638	0.000102092	0.000318514	up	--	--	Biological Process: cellular process (GO:0009987);;	--	--	--	AUX/IAA family	Auxin-responsive protein IAA17 OS=Arabidopsis thaliana OX=3702 GN=IAA17 PE=1 SV=2	Aux/IAA-ARF-dimerization [Cynara cardunculus var. scolymus]
Unigene112336	346.019	154.767	-1.16035	3.34985e-23	6.16391e-22	down	--	--	Biological Process: transcription, DNA-templated (GO:0006351);; Biological Process: regulation of cellular process (GO:0050794);;	--	--	--	AUX/IAA family	Auxin-responsive protein IAA18 OS=Arabidopsis thaliana OX=3702 GN=IAA18 PE=1 SV=2	auxin-responsive protein IAA7-like [Helianthus annuus]
Unigene098686	11.6603	0	-5.01652	6.4287e-06	2.45428e-05	down	--	--	--	--	--	--	--	Auxin-responsive protein IAA18 OS=Arabidopsis thaliana OX=3702 GN=IAA18 PE=1 SV=2	auxin-responsive protein IAA26-like isoform X1 [Helianthus annuus]
Unigene014692	9.12467	94.2257	3.31398	2.13788e-21	3.55804e-20	up	--	--	--	K14484|3e-69|vvi:100253148|IAA;IAA|hypothetical protein LOC100253148	--	--	AUX/IAA family	Auxin-responsive protein IAA27 OS=Arabidopsis thaliana OX=3702 GN=IAA27 PE=1 SV=1	auxin-responsive protein IAA27-like [Lactuca sativa]
Unigene198965	13.9937	62.0247	2.11731	4.49798e-09	2.68513e-08	up	--	--	--	K14484|3e-84|vvi:100253148|IAA;IAA|hypothetical protein LOC100253148	--	--	AUX/IAA family	Auxin-responsive protein IAA27 OS=Arabidopsis thaliana OX=3702 GN=IAA27 PE=1 SV=1	auxin-responsive protein IAA27-like [Lactuca sativa]
Unigene009466	275.637	1096.6	1.98895	6.64264e-123	1.59667e-120	up	--	--	--	K14484|2e-19|vvi:100253148|IAA;IAA|hypothetical protein LOC100253148	--	--	--	Auxin-responsive protein IAA27 OS=Arabidopsis thaliana OX=3702 GN=IAA27 PE=1 SV=1	auxin-responsive protein IAA21-like [Helianthus annuus]
Unigene122055	88.9361	353.705	1.98826	1.54752e-49	8.06485e-48	up	--	--	--	K14484|2e-06|zma:100191581|IAA;IAA|hypothetical protein LOC100191581	--	--	--	Auxin-responsive protein IAA27 OS=Arabidopsis thaliana OX=3702 GN=IAA27 PE=1 SV=1	--
Unigene145360	334.384	1256.54	1.91009	1.72155e-135	4.83291e-133	up	--	--	--	K14484|1e-52|vvi:100253148|IAA;IAA|hypothetical protein LOC100253148	--	--	AUX/IAA family	Auxin-responsive protein IAA27 OS=Arabidopsis thaliana OX=3702 GN=IAA27 PE=1 SV=1	auxin-responsive protein IAA21-like [Helianthus annuus]
Unigene110601	55.8665	12.4958	-2.12207	1.09869e-09	7.06593e-09	down	--	--	--	K14484|3e-11|vvi:100254530|IAA;IAA|hypothetical protein LOC100254530	--	--	--	Auxin-responsive protein IAA30 OS=Oryza sativa subsp. japonica OX=39947 GN=IAA30 PE=2 SV=1	auxin-responsive protein IAA14-like [Helianthus annuus]
ARF
Unigene081452	0	8.21093	4.23459	0.000253413	0.000735683	up	--	--	--	--	--	--	--	Auxin response factor 1 OS=Arabidopsis thaliana OX=3702 GN=ARF1 PE=1 SV=2	Aux/IAA-ARF-dimerization [Cynara cardunculus var. scolymus]
Unigene070441	4.42677	37.9472	3.00802	2.19371e-09	1.36294e-08	up	--	--	Molecular Function: DNA binding (GO:0003677);; Cellular Component: nucleus (GO:0005634);; Biological Process: regulation of transcription, DNA-templated (GO:0006355);; Biological Process: auxin-activated signaling pathway (GO:0009734);; Molecular Function: protein dimerization activity (GO:0046983);;	--	--	--	Auxin response factor	Auxin response factor 1 OS=Arabidopsis thaliana OX=3702 GN=ARF1 PE=1 SV=2	Auxin response factor like [Actinidia chinensis var. chinensis]
Unigene089311	52.3643	346.019	2.71652	4.37282e-64	3.42792e-62	up	--	--	--	--	--	--	--	Auxin response factor 1 OS=Arabidopsis thaliana OX=3702 GN=ARF1 PE=1 SV=2	Auxin response factor like [Actinidia chinensis var. chinensis]
Unigene202361	55.2751	12.9832	-1.92244	0.0120752	0.0243429	down	--	--	Molecular Function: DNA binding (GO:0003677);; Cellular Component: nucleus (GO:0005634);; Biological Process: regulation of transcription, DNA-templated (GO:0006355);; Biological Process: auxin-activated signaling pathway (GO:0009734);; Molecular Function: protein dimerization activity (GO:0046983);;	--	--	--	Auxin response factor	Auxin response factor 1 OS=Arabidopsis thaliana OX=3702 GN=ARF1 PE=1 SV=2	unnamed protein product [Coffea canephora]
Unigene170282	166.476	2.66498	-5.79943	2.04701e-34	6.29795e-33	down	--	--	Molecular Function: binding (GO:0005488);; Biological Process: transcription, DNA-templated (GO:0006351);; Biological Process: response to hormone (GO:0009725);; Biological Process: regulation of cellular process (GO:0050794);;	K14486|4e-38|pop:POPTR_828321|K14486, ARF;K14486, ARF|hypothetical protein; K14486 auxin response factor	--	--	--	Auxin response factor 1 OS=Arabidopsis thaliana OX=3702 GN=ARF1 PE=1 SV=2	auxin response factor 1 [Sesamum indicum]
Unigene060629	0	6.46711	3.85197	0.00134943	0.00338882	up	--	--	--	--	--	--	Auxin response factor	Auxin response factor 2A OS=Solanum lycopersicum OX=4081 GN=ARF2A PE=1 SV=1	auxin response factor 2A-like isoform X2 [Helianthus annuus]
Unigene185871	85.1275	29.7359	-1.51056	1.653e-09	1.04091e-08	down	--	--	--	--	--	--	Auxin response factor	Auxin response factor 2A OS=Solanum lycopersicum OX=4081 GN=ARF2A PE=1 SV=1	auxin response factor 2A-like isoform X2 [Helianthus annuus]
Unigene054454	3.37045	26.6466	2.8693	1.15884e-06	4.96833e-06	up	--	--	Molecular Function: DNA binding (GO:0003677);; Cellular Component: nucleus (GO:0005634);; Biological Process: regulation of transcription, DNA-templated (GO:0006355);; Biological Process: auxin-activated signaling pathway (GO:0009734);;	K14486|5e-53|pop:POPTR_713904|K14486, ARF;K14486, ARF|hypothetical protein; K14486 auxin response factor	--	--	B3 DNA binding domain;; Auxin response factor;; Proteasome maturation factor UMP1	Auxin response factor 3 OS=Arabidopsis thaliana OX=3702 GN=ARF3 PE=1 SV=2	hypothetical protein LSAT_7X22140 [Lactuca sativa]
Unigene086716	192.639	602.987	1.6436	1.90491e-55	1.18192e-53	up	--	--	Biological Process: transcription, DNA-templated (GO:0006351);; Biological Process: pattern specification process (GO:0007389);; Biological Process: anatomical structure morphogenesis (GO:0009653);; Biological Process: response to auxin (GO:0009733);; Biological Process: flower development (GO:0009908);; Biological Process: cellular process (GO:0044763);; Biological Process: regulation of cellula…	K14486|1e-144|pop:POPTR_713904|K14486, ARF;K14486, ARF|hypothetical protein; K14486 auxin response factor	--	--	Auxin response factor;; B3 DNA binding domain	Auxin response factor 3 OS=Arabidopsis thaliana OX=3702 GN=ARF3 PE=1 SV=2	hypothetical protein LSAT_7X22140 [Lactuca sativa]
Unigene079292	19.0318	49.035	1.34947	2.93824e-05	0.000100754	up	--	--	Biological Process: multicellular organism development (GO:0007275);; Biological Process: cellular process (GO:0009987);; Biological Process: response to stimulus (GO:0050896);; Biological Process: biological regulation (GO:0065007);;	K14486|0.0|vvi:100245251|K14486, ARF;K14486, ARF|hypothetical protein LOC100245251; K14486 auxin response factor	--	--	Auxin response factor;; B3 DNA binding domain	Auxin response factor 3 OS=Arabidopsis thaliana OX=3702 GN=ARF3 PE=1 SV=2	auxin response factor 3-like [Helianthus annuus]
Unigene128086	0	4.98646	3.40912	0.00683442	0.0146176	up	--	--	--	--	--	--	--	Auxin response factor 4 OS=Arabidopsis thaliana OX=3702 GN=ARF4 PE=1 SV=1	Aux/IAA-ARF-dimerization [Cynara cardunculus var. scolymus]
Unigene056414	2.1982	14.6499	2.54265	0.000424896	0.00118173	up	--	--	--	K13137|2e-24|vvi:100260049|STRAP, UNRIP;STRAP, UNRIP|hypothetical protein LOC100260049; K13137 serine-threonine kinase receptor-associated protein	[I]	Lipid transport and metabolism	--	Auxin response factor 4 OS=Arabidopsis thaliana OX=3702 GN=ARF4 PE=1 SV=1	serine-threonine kinase receptor-associated protein-like [Helianthus annuus]
Unigene112962	34.602	187.745	2.42357	1.96131e-31	5.36528e-30	up	--	--	Molecular Function: binding (GO:0005488);; Biological Process: transcription, DNA-templated (GO:0006351);; Biological Process: response to hormone (GO:0009725);; Biological Process: regulation of cellular process (GO:0050794);;	--	--	--	--	Auxin response factor 4 OS=Arabidopsis thaliana OX=3702 GN=ARF4 PE=1 SV=1	auxin response factor 4-like [Lactuca sativa]
Unigene032547	84.8032	380.313	2.15506	7.98072e-53	4.57583e-51	up	--	--	Biological Process: cellular process (GO:0009987);;	--	--	--	--	Auxin response factor 4 OS=Arabidopsis thaliana OX=3702 GN=ARF4 PE=1 SV=1	auxin response factor 4-like [Helianthus annuus]
Unigene144490	57.1491	224.688	1.96996	3.79786e-31	1.02628e-29	up	--	--	Molecular Function: DNA binding (GO:0003677);; Molecular Function: DNA-binding transcription factor activity (GO:0003700);; Cellular Component: nucleus (GO:0005634);; Biological Process: regulation of transcription, DNA-templated (GO:0006355);; Biological Process: auxin-activated signaling pathway (GO:0009734);; Biological Process: vegetative phase change (GO:0010050);; Biological Process: abaxia…	--	--	--	Auxin response factor;; B3 DNA binding domain	Auxin response factor 4 OS=Arabidopsis thaliana OX=3702 GN=ARF4 PE=1 SV=1	auxin response factor 4-like [Lactuca sativa]
Unigene152666	22.5284	81.4767	1.83124	9.1864e-11	6.70337e-10	up	--	--	Molecular Function: DNA binding (GO:0003677);; Cellular Component: nucleus (GO:0005634);; Biological Process: regulation of transcription, DNA-templated (GO:0006355);; Biological Process: auxin-activated signaling pathway (GO:0009734);; Molecular Function: protein dimerization activity (GO:0046983);;	--	--	--	--	Auxin response factor 4 OS=Arabidopsis thaliana OX=3702 GN=ARF4 PE=1 SV=1	putative auxin response factor, DNA-binding pseudobarrel domain protein [Helianthus annuus]
Unigene205004	85.7672	281.435	1.71228	2.53589e-29	6.29685e-28	up	--	--	Molecular Function: binding (GO:0005488);; Biological Process: transcription, DNA-templated (GO:0006351);; Biological Process: response to hormone (GO:0009725);; Biological Process: cellular process (GO:0044763);; Biological Process: developmental process (GO:0044767);; Biological Process: regulation of cellular process (GO:0050794);;	--	--	--	Auxin response factor;; B3 DNA binding domain	Auxin response factor 4 OS=Arabidopsis thaliana OX=3702 GN=ARF4 PE=1 SV=1	auxin response factor 4-like [Helianthus annuus]
Unigene104471	17.5608	51.9837	1.54388	1.91066e-06	7.92203e-06	up	--	--	--	--	--	--	--	Auxin response factor 4 OS=Arabidopsis thaliana OX=3702 GN=ARF4 PE=1 SV=1	auxin response factor 4-like [Helianthus annuus]
Unigene157912	21.7081	4.64974	-2.12329	0.000161755	0.000486951	down	--	--	--	--	--	--	--	Auxin response factor 4 OS=Arabidopsis thaliana OX=3702 GN=ARF4 PE=1 SV=1	Os08g0543275 [Oryza sativa Japonica Group]
Unigene165216	26.2956	0	-6.15131	4.56393e-09	2.72253e-08	down	--	--	--	--	--	--	--	Auxin response factor 4 OS=Arabidopsis thaliana OX=3702 GN=ARF4 PE=1 SV=1	--
Unigene005010	1.45581	14.3826	3.00503	0.000141511	0.000430574	up	--	--	Molecular Function: DNA binding (GO:0003677);; Cellular Component: nucleus (GO:0005634);; Biological Process: regulation of transcription, DNA-templated (GO:0006355);; Biological Process: auxin-activated signaling pathway (GO:0009734);; Molecular Function: protein dimerization activity (GO:0046983);;	K14486|1e-104|pop:POPTR_652033|K14486, ARF;K14486, ARF|hypothetical protein; K14486 auxin response factor	--	--	--	Auxin response factor 5 OS=Arabidopsis thaliana OX=3702 GN=ARF5 PE=1 SV=3	auxin response factor 5-like [Helianthus annuus]
Unigene016304	4.42953	18.9426	1.9964	0.00115429	0.00293474	up	--	--	--	K14486|7e-76|pop:POPTR_652033|K14486, ARF;K14486, ARF|hypothetical protein; K14486 auxin response factor	--	--	--	Auxin response factor 5 OS=Arabidopsis thaliana OX=3702 GN=ARF5 PE=1 SV=3	auxin response factor 5-like [Lactuca sativa]
Unigene195486	292.689	27.0164	-3.42454	1.28525e-70	1.17897e-68	down	--	--	Molecular Function: DNA binding (GO:0003677);; Cellular Component: nucleus (GO:0005634);; Biological Process: regulation of transcription, DNA-templated (GO:0006355);; Biological Process: auxin-activated signaling pathway (GO:0009734);; Molecular Function: protein dimerization activity (GO:0046983);;	K14486|6e-30|rcu:RCOM_1597120|K14486, ARF;K14486, ARF|Auxin response factor, putative; K14486 auxin response factor	--	--	Auxin response factor	Auxin response factor 5 OS=Arabidopsis thaliana OX=3702 GN=ARF5 PE=1 SV=3	hypothetical protein LSAT_2X12381 [Lactuca sativa]
Unigene018934	87.559	372.384	2.08424	2.12033e-48	1.06472e-46	up	--	--	Molecular Function: DNA binding (GO:0003677);; Cellular Component: nucleus (GO:0005634);; Biological Process: regulation of transcription, DNA-templated (GO:0006355);; Biological Process: auxin-activated signaling pathway (GO:0009734);; Molecular Function: protein dimerization activity (GO:0046983);;	--	--	--	Auxin response factor;; B3 DNA binding domain	Auxin response factor 6 OS=Arabidopsis thaliana OX=3702 GN=ARF6 PE=1 SV=2	auxin response factor 8-like [Olea europaea var. sylvestris]
Unigene197716	115.867	331.886	1.51642	6.89816e-28	1.60043e-26	up	--	--	Molecular Function: DNA binding (GO:0003677);; Molecular Function: DNA-binding transcription factor activity (GO:0003700);; Cellular Component: nucleus (GO:0005634);; Biological Process: regulation of transcription, DNA-templated (GO:0006355);; Biological Process: auxin-activated signaling pathway (GO:0009734);; Biological Process: determination of bilateral symmetry (GO:0009855);; Biological Pro…	--	--	--	Auxin response factor;; B3 DNA binding domain	Auxin response factor 6 OS=Arabidopsis thaliana OX=3702 GN=ARF6 PE=1 SV=2	auxin response factor 6 [Lactuca sativa]
Unigene063811	208.118	45.9735	-2.16959	8.65276e-32	2.40011e-30	down	--	--	--	K12486|4e-12|vvi:100262374|SMAP;SMAP|hypothetical protein LOC100262374; K12486 stromal membrane-associated protein	[T]	Signal transduction mechanisms	--	Auxin response factor 6 OS=Arabidopsis thaliana OX=3702 GN=ARF6 PE=1 SV=2	probable ADP-ribosylation factor GTPase-activating protein AGD15 [Helianthus annuus]
Unigene075528	69.0813	278.607	2.00988	6.06743e-36	1.98976e-34	up	--	--	--	--	--	--	--	Auxin response factor 7 OS=Arabidopsis thaliana OX=3702 GN=ARF7 PE=1 SV=2	Phox/Bem1p [Cynara cardunculus var. scolymus]
Unigene122351	334.293	973.13	1.54166	1.99108e-81	2.32899e-79	up	--	--	--	--	[O]	Posttranslational modification, protein turnover, chaperones	DnaJ domain	Auxin response factor 7 OS=Arabidopsis thaliana OX=3702 GN=ARF7 PE=1 SV=2	nuclear mitotic apparatus protein 1-like [Helianthus annuus]
Unigene187934	45.2522	21.617	-1.04732	0.00130564	0.00328774	down	--	--	--	--	--	--	--	Auxin response factor 7 OS=Arabidopsis thaliana OX=3702 GN=ARF7 PE=1 SV=2	Phox/Bem1p [Cynara cardunculus var. scolymus]
Unigene193028	55.3386	180.476	1.69516	2.82763e-18	3.89732e-17	up	--	--	Molecular Function: DNA binding (GO:0003677);; Cellular Component: nucleus (GO:0005634);; Biological Process: regulation of transcription, DNA-templated (GO:0006355);; Biological Process: auxin-activated signaling pathway (GO:0009734);; Molecular Function: protein dimerization activity (GO:0046983);;	--	--	--	--	Auxin response factor 7 OS=Oryza sativa subsp. japonica OX=39947 GN=ARF7 PE=2 SV=1	auxin response factor 9-like isoform X2 [Lactuca sativa]
Unigene131924	108.968	12.1895	-3.11695	2.07881e-26	4.4963e-25	down	--	--	Molecular Function: DNA binding (GO:0003677);; Molecular Function: DNA-binding transcription factor activity (GO:0003700);; Cellular Component: nucleus (GO:0005634);; Biological Process: regulation of transcription, DNA-templated (GO:0006355);; Biological Process: auxin-activated signaling pathway (GO:0009734);; Biological Process: determination of bilateral symmetry (GO:0009855);; Biological Pro…	--	--	--	--	Auxin response factor 8 OS=Arabidopsis thaliana OX=3702 GN=ARF8 PE=1 SV=2	Auxin response factor like [Actinidia chinensis var. chinensis]
Unigene195143	22.7272	0	-5.95546	1.71086e-08	9.48869e-08	down	--	--	Molecular Function: DNA binding (GO:0003677);; Cellular Component: nucleus (GO:0005634);; Biological Process: regulation of transcription, DNA-templated (GO:0006355);; Biological Process: auxin-activated signaling pathway (GO:0009734);; Molecular Function: protein dimerization activity (GO:0046983);;	--	--	--	--	Auxin response factor 8 OS=Arabidopsis thaliana OX=3702 GN=ARF8 PE=1 SV=2	auxin response factor 6-like [Helianthus annuus]
Unigene050042	92.5487	256.381	1.4674	1.13111e-23	2.1349e-22	up	--	--	Biological Process: cellular process (GO:0009987);;	--	--	--	AUX/IAA family;; Auxin response factor	Auxin response factor 9 OS=Arabidopsis thaliana OX=3702 GN=ARF9 PE=1 SV=1	Aux/IAA-ARF-dimerization [Cynara cardunculus var. scolymus]
Unigene173568	13.1464	36.9399	1.46183	0.000103274	0.00032192	up	--	--	Molecular Function: DNA binding (GO:0003677);; Cellular Component: nucleus (GO:0005634);; Biological Process: regulation of transcription, DNA-templated (GO:0006355);; Biological Process: auxin-activated signaling pathway (GO:0009734);; Molecular Function: protein dimerization activity (GO:0046983);;	--	--	--	Auxin response factor	Auxin response factor 9 OS=Arabidopsis thaliana OX=3702 GN=ARF9 PE=1 SV=1	auxin response factor 9-like isoform X2 [Lactuca sativa]
Unigene175153	8.78453	0	-4.58666	6.67038e-05	0.000214964	down	--	--	--	--	--	--	--	Auxin response factor 10 OS=Arabidopsis thaliana OX=3702 GN=ARF10 PE=2 SV=1	Aux/IAA-ARF-dimerization [Cynara cardunculus var. scolymus]
Unigene015035	18.5481	86.3869	2.19097	2.19788e-14	2.27047e-13	up	--	--	--	--	--	--	B3 DNA binding domain	Auxin response factor 11 OS=Arabidopsis thaliana OX=3702 GN=ARF11 PE=2 SV=3	auxin response factor 9-like isoform X2 [Lactuca sativa]
Unigene198159	22.1483	95.421	2.07908	4.48527e-13	4.14503e-12	up	--	--	--	--	--	--	B3 DNA binding domain	Auxin response factor 11 OS=Arabidopsis thaliana OX=3702 GN=ARF11 PE=2 SV=3	auxin response factor 9-like isoform X1 [Lactuca sativa]
Unigene079977	73.7378	154.399	1.06486	2.40177e-09	1.48427e-08	up	--	--	--	--	--	--	B3 DNA binding domain	Auxin response factor 11 OS=Arabidopsis thaliana OX=3702 GN=ARF11 PE=2 SV=3	auxin response factor 18-like isoform X1 [Lactuca sativa]
Unigene173805	82.9376	291.656	1.80844	3.16906e-36	1.04968e-34	up	--	--	Molecular Function: DNA binding (GO:0003677);; Cellular Component: nucleus (GO:0005634);; Biological Process: regulation of transcription, DNA-templated (GO:0006355);; Biological Process: auxin-activated signaling pathway (GO:0009734);; Molecular Function: protein dimerization activity (GO:0046983);;	--	--	--	Auxin response factor;; B3 DNA binding domain	Auxin response factor 12 OS=Oryza sativa subsp. indica OX=39946 GN=ARF12 PE=3 SV=1	unnamed protein product, partial [Vitis vinifera]
Unigene166053	30.1214	0.282239	-5.56285	5.16775e-09	3.06162e-08	down	--	--	--	--	--	--	--	Auxin response factor 13 OS=Oryza sativa subsp. japonica OX=39947 GN=ARF13 PE=2 SV=2	C1-like protein [Cynara cardunculus var. scolymus]
Unigene079804	1.83184	12.0371	2.48044	0.00166388	0.0040888	up	--	--	--	--	--	--	--	Auxin response factor 15 OS=Oryza sativa subsp. japonica OX=39947 GN=ARF15 PE=2 SV=1	uncharacterized protein LOC111910192 [Lactuca sativa]
Unigene143297	11.3022	28.3863	1.29694	0.00181316	0.00442652	up	--	--	Molecular Function: DNA binding (GO:0003677);; Cellular Component: nucleus (GO:0005634);; Biological Process: regulation of transcription, DNA-templated (GO:0006355);; Biological Process: auxin-activated signaling pathway (GO:0009734);;	--	--	--	B3 DNA binding domain;; Auxin response factor	Auxin response factor 16 OS=Oryza sativa subsp. japonica OX=39947 GN=ARF16 PE=2 SV=1	auxin response factor 19 [Quercus suber]
Unigene167591	19.5016	5.53368	-1.73606	0.00213209	0.00512838	down	--	--	--	--	--	--	--	Auxin response factor 18 OS=Arabidopsis thaliana OX=3702 GN=ARF18 PE=1 SV=1	hypothetical protein LSAT_6X9480 [Lactuca sativa]
Unigene132557	108.694	14.1652	-2.893	1.18213e-21	1.99439e-20	down	--	--	Molecular Function: DNA binding (GO:0003677);; Cellular Component: nucleus (GO:0005634);; Biological Process: regulation of transcription, DNA-templated (GO:0006355);; Biological Process: auxin-activated signaling pathway (GO:0009734);; Molecular Function: protein dimerization activity (GO:0046983);;	--	--	--	AUX/IAA family	Auxin response factor 18 OS=Arabidopsis thaliana OX=3702 GN=ARF18 PE=1 SV=1	Aux/IAA-ARF-dimerization [Cynara cardunculus var. scolymus]
Unigene000660	2.57699	11.5321	1.99413	0.00853647	0.0178613	up	--	--	Biological Process: cellular process (GO:0009987);;	--	--	--	Auxin response factor;; B3 DNA binding domain	Auxin response factor 18 OS=Oryza sativa subsp. japonica OX=39947 GN=ARF18 PE=2 SV=1	Aux/IAA-ARF-dimerization [Cynara cardunculus var. scolymus]
Unigene124495	356.076	169.395	-1.06813	1.71611e-18	2.39931e-17	down	--	--	Molecular Function: binding (GO:0005488);; Biological Process: transcription, DNA-templated (GO:0006351);; Biological Process: response to hormone (GO:0009725);; Biological Process: regulation of cellular process (GO:0050794);;	--	--	--	Auxin response factor;; B3 DNA binding domain;; AUX/IAA family	Auxin response factor 18 OS=Oryza sativa subsp. japonica OX=39947 GN=ARF18 PE=2 SV=1	auxin response factor 18-like [Lactuca sativa]
Unigene155877	361.555	145.434	-1.30812	5.05562e-26	1.07505e-24	down	--	--	Molecular Function: binding (GO:0005488);; Biological Process: response to hormone (GO:0009725);; Biological Process: primary metabolic process (GO:0044238);; Biological Process: cellular process (GO:0044763);; Biological Process: animal organ development (GO:0048513);; Biological Process: reproductive structure development (GO:0048608);; Biological Process: phyllome development (GO:0048827);; Bi…	--	--	--	--	Auxin response factor 18 OS=Oryza sativa subsp. japonica OX=39947 GN=ARF18 PE=2 SV=1	Aux/IAA-ARF-dimerization [Cynara cardunculus var. scolymus]
Unigene055078	34.9214	110.142	1.64038	1.2641e-11	1.01435e-10	up	--	--	Molecular Function: DNA binding (GO:0003677);; Cellular Component: nucleus (GO:0005634);; Biological Process: regulation of transcription, DNA-templated (GO:0006355);; Biological Process: auxin-activated signaling pathway (GO:0009734);;	--	--	--	B3 DNA binding domain	Auxin response factor 19 OS=Arabidopsis thaliana OX=3702 GN=ARF19 PE=1 SV=2	Aux/IAA-ARF-dimerization [Cynara cardunculus var. scolymus]
Unigene124981	24.165	163.113	2.73709	1.47062e-31	4.04228e-30	up	--	--	Molecular Function: DNA binding (GO:0003677);; Cellular Component: nucleus (GO:0005634);; Biological Process: regulation of transcription, DNA-templated (GO:0006355);; Biological Process: auxin-activated signaling pathway (GO:0009734);; Molecular Function: protein dimerization activity (GO:0046983);;	--	--	--	--	Auxin response factor 19 OS=Oryza sativa subsp. japonica OX=39947 GN=ARF19 PE=2 SV=2	auxin response factor 19-like [Lactuca sativa]
Unigene091974	4.3136	15.5379	1.73635	0.0061851	0.0133755	up	--	--	Molecular Function: binding (GO:0005488);; Biological Process: transcription, DNA-templated (GO:0006351);; Biological Process: response to hormone (GO:0009725);; Biological Process: regulation of cellular process (GO:0050794);;	--	--	--	Auxin response factor	Auxin response factor 19 OS=Oryza sativa subsp. japonica OX=39947 GN=ARF19 PE=2 SV=2	Aux/IAA-ARF-dimerization [Cynara cardunculus var. scolymus]
Unigene003045	8.34087	19.5447	1.18491	0.0164435	0.0319543	up	--	--	Molecular Function: DNA binding (GO:0003677);; Cellular Component: nucleus (GO:0005634);; Biological Process: regulation of transcription, DNA-templated (GO:0006355);; Biological Process: auxin-activated signaling pathway (GO:0009734);; Molecular Function: protein dimerization activity (GO:0046983);;	--	--	--	Auxin response factor;; B3 DNA binding domain	Auxin response factor 19 OS=Oryza sativa subsp. japonica OX=39947 GN=ARF19 PE=2 SV=2	auxin response factor 19-like [Lactuca sativa]
Unigene121499	46.038	8.78948	-2.3446	1.54862e-09	9.78699e-09	down	--	--	Molecular Function: DNA binding (GO:0003677);; Cellular Component: nucleus (GO:0005634);; Biological Process: regulation of transcription, DNA-templated (GO:0006355);; Biological Process: auxin-activated signaling pathway (GO:0009734);; Molecular Function: protein dimerization activity (GO:0046983);;	--	--	--	--	Auxin response factor 19 OS=Oryza sativa subsp. japonica OX=39947 GN=ARF19 PE=2 SV=2	PREDICTED: auxin response factor 7-like [Tarenaya hassleriana]
Unigene012076	13.8681	60.2911	2.08951	6.68757e-10	4.4137e-09	up	--	--	--	--	--	--	Auxin response factor	Auxin response factor 23 OS=Oryza sativa subsp. japonica OX=39947 GN=ARF23 PE=1 SV=2	auxin response factor 2A-like [Lactuca sativa]
Unigene039452	0	11.2402	4.65168	4.27536e-05	0.000142522	up	--	--	--	--	--	--	--	Auxin response factor 25 OS=Oryza sativa subsp. japonica OX=39947 GN=ARF25 PE=2 SV=1	--
GH3
Unigene127632	133.052	12.3112	-3.39984	2.9462e-31	7.9992e-30	down	--	--	--	K14487|0.0|rcu:RCOM_1176020|GH3;GH3|Indole-3-acetic acid-amido synthetase GH3.5, putative; K14487 auxin responsive GH3 gene family	--	--	GH3 auxin-responsive promoter;; GH3 auxin-responsive promoter	Indole-3-acetic acid-amido synthetase GH3.10 OS=Arabidopsis thaliana OX=3702 GN=GH3.10 PE=2 SV=1	GH3 auxin-responsive promoter [Cynara cardunculus var. scolymus]
Unigene009424	114.507	9.47879	-3.56183	1.73472e-28	4.14159e-27	down	--	--	Cellular Component: chloroplast (GO:0009507);; Biological Process: response to salt stress (GO:0009651);; Biological Process: response to abscisic acid (GO:0009737);;	K14487|0.0|rcu:RCOM_1176020|GH3;GH3|Indole-3-acetic acid-amido synthetase GH3.5, putative; K14487 auxin responsive GH3 gene family	--	--	GH3 auxin-responsive promoter	Indole-3-acetic acid-amido synthetase GH3.10 OS=Arabidopsis thaliana OX=3702 GN=GH3.10 PE=2 SV=1	hypothetical protein LSAT_3X39381 [Lactuca sativa]
Unigene018393	4.40607	43.147	3.19121	8.87285e-11	6.48475e-10	up	--	--	--	K14487|1e-146|rcu:RCOM_0032550|GH3;GH3|Indole-3-acetic acid-amido synthetase GH3.6, putative; K14487 auxin responsive GH3 gene family	--	--	GH3 auxin-responsive promoter	Indole-3-acetic acid-amido synthetase GH3.5 OS=Arabidopsis thaliana OX=3702 GN=GH3.5 PE=1 SV=1	indole-3-acetic acid-amido synthetase GH3.6-like [Lactuca sativa]
Unigene041108	86.268	419.034	2.27391	5.39393e-60	3.80354e-58	up	--	--	--	K14487|4e-73|rcu:RCOM_0032550|GH3;GH3|Indole-3-acetic acid-amido synthetase GH3.6, putative; K14487 auxin responsive GH3 gene family	--	--	GH3 auxin-responsive promoter	Indole-3-acetic acid-amido synthetase GH3.5 OS=Arabidopsis thaliana OX=3702 GN=GH3.5 PE=1 SV=1	indole-3-acetic acid-amido synthetase GH3.6-like [Lactuca sativa]
Unigene131079	15.3115	64.1849	2.03886	2.62363e-10	1.81623e-09	up	--	--	--	K14487|0.0|vvi:100250242|GH3;GH3|hypothetical protein LOC100250242; K14487 auxin responsive GH3 gene family	--	--	GH3 auxin-responsive promoter	Indole-3-acetic acid-amido synthetase GH3.5 OS=Arabidopsis thaliana OX=3702 GN=GH3.5 PE=1 SV=1	indole-3-acetic acid-amido synthetase GH3.5-like [Lactuca sativa]
Unigene090441	69.1978	284.002	2.03097	1.2421e-37	4.34844e-36	up	--	--	--	K14487|0.0|rcu:RCOM_0032550|GH3;GH3|Indole-3-acetic acid-amido synthetase GH3.6, putative; K14487 auxin responsive GH3 gene family	--	--	GH3 auxin-responsive promoter	Indole-3-acetic acid-amido synthetase GH3.5 OS=Arabidopsis thaliana OX=3702 GN=GH3.5 PE=1 SV=1	indole-3-acetic acid-amido synthetase GH3.6 [Helianthus annuus]
Unigene144334	67.4502	266.313	1.97769	4.89846e-37	1.67855e-35	up	--	--	--	K14487|0.0|rcu:RCOM_0032550|GH3;GH3|Indole-3-acetic acid-amido synthetase GH3.6, putative; K14487 auxin responsive GH3 gene family	--	--	GH3 auxin-responsive promoter	Indole-3-acetic acid-amido synthetase GH3.5 OS=Arabidopsis thaliana OX=3702 GN=GH3.5 PE=1 SV=1	indole-3-acetic acid-amido synthetase GH3.6 [Helianthus annuus]
Unigene002963	16.1367	49.2038	1.58729	2.92008e-06	1.17671e-05	up	--	--	--	K14487|0.0|vvi:100250242|GH3;GH3|hypothetical protein LOC100250242; K14487 auxin responsive GH3 gene family	--	--	GH3 auxin-responsive promoter	Indole-3-acetic acid-amido synthetase GH3.5 OS=Arabidopsis thaliana OX=3702 GN=GH3.5 PE=1 SV=1	indole-3-acetic acid-amido synthetase GH3.5-like [Helianthus annuus]
Unigene045931	5.16364	17.1288	1.65942	0.00533255	0.0117035	up	--	--	--	K14487|0.0|vvi:100250868|GH3;GH3|hypothetical protein LOC100250868; K14487 auxin responsive GH3 gene family	--	--	GH3 auxin-responsive promoter	Probable indole-3-acetic acid-amido synthetase GH3.1 OS=Arabidopsis thaliana OX=3702 GN=GH3.1 PE=2 SV=1	probable indole-3-acetic acid-amido synthetase GH3.1 [Helianthus annuus]
Unigene076532	9.80772	31.2019	1.62641	0.000144582	0.000439262	up	--	--	--	K14487|0.0|rcu:RCOM_1154750|GH3;GH3|Indole-3-acetic acid-amido synthetase GH3.3, putative; K14487 auxin responsive GH3 gene family	--	--	GH3 auxin-responsive promoter	Probable indole-3-acetic acid-amido synthetase GH3.1 OS=Arabidopsis thaliana OX=3702 GN=GH3.1 PE=2 SV=1	probable indole-3-acetic acid-amido synthetase GH3.1 [Lactuca sativa]
Unigene071620	0	26.646	5.88985	2.25107e-08	1.22955e-07	up	--	--	Biological Process: metabolic process (GO:0008152);; Cellular Component: chloroplast envelope (GO:0009941);; Molecular Function: ligase activity (GO:0016874);;	K14487|0.0|vvi:100250437|GH3;GH3|hypothetical protein LOC100250437; K14487 auxin responsive GH3 gene family	--	--	GH3 auxin-responsive promoter	Putative indole-3-acetic acid-amido synthetase GH3.9 OS=Arabidopsis thaliana OX=3702 GN=GH3.9 PE=2 SV=1	putative indole-3-acetic acid-amido synthetase GH3.9 [Lactuca sativa]
Unigene033251	131.668	55.8914	-1.22492	1.06683e-09	6.87797e-09	down	--	--	Biological Process: metabolic process (GO:0008152);; Cellular Component: chloroplast envelope (GO:0009941);; Molecular Function: ligase activity (GO:0016874);;	K14487|5e-55|vvi:100250437|GH3;GH3|hypothetical protein LOC100250437; K14487 auxin responsive GH3 gene family	--	--	GH3 auxin-responsive promoter;; Glycosyl hydrolases family 32 C terminal	Putative indole-3-acetic acid-amido synthetase GH3.9 OS=Arabidopsis thaliana OX=3702 GN=GH3.9 PE=2 SV=1	putative indole-3-acetic acid-amido synthetase GH3.9 [Lactuca sativa]
Unigene119690	526.9	39.9864	-3.70606	8.71764e-132	2.3245e-129	down	--	--	--	K14487|2e-66|vvi:100250437|GH3;GH3|hypothetical protein LOC100250437; K14487 auxin responsive GH3 gene family	--	--	GH3 auxin-responsive promoter;; GH3 auxin-responsive promoter	Putative indole-3-acetic acid-amido synthetase GH3.9 OS=Arabidopsis thaliana OX=3702 GN=GH3.9 PE=2 SV=1	putative indole-3-acetic acid-amido synthetase GH3.9 [Lactuca sativa]
SAUR
Unigene155987	26.8359	6.14855	-2.05849	2.5962e-05	8.98263e-05	down	--	--	--	K14488|3e-31|pop:POPTR_556560|SAUR;SAUR|SAUR82; SAUR family protein; K14488 SAUR family protein	--	--	Auxin responsive protein	Auxin-responsive protein SAUR21 OS=Arabidopsis thaliana OX=3702 GN=SAUR21 PE=2 SV=1	hypothetical protein Ccrd_017563 [Cynara cardunculus var. scolymus]
Unigene070689	0	7.57611	4.06558	0.000623964	0.00167692	up	--	--	--	K14488|5e-29|pop:POPTR_556560|SAUR;SAUR|SAUR82; SAUR family protein; K14488 SAUR family protein	--	--	Auxin responsive protein	Auxin-responsive protein SAUR24 OS=Arabidopsis thaliana OX=3702 GN=SAUR24 PE=2 SV=1	putative small auxin-up RNA [Helianthus annuus]
Unigene086798	51.0203	303.909	2.5694	3.61374e-52	2.02744e-50	up	[P]	Inorganic ion transport and metabolism	--	K14488|9e-48|pop:POPTR_569631|SAUR;SAUR|SAUR22; SAUR family protein; K14488 SAUR family protein	--	--	Auxin responsive protein	Auxin-responsive protein SAUR32 OS=Arabidopsis thaliana OX=3702 GN=SAUR32 PE=2 SV=1	putative SAUR-like auxin-responsive protein family [Helianthus annuus]
Unigene122778	38.0208	115.079	1.58775	3.93205e-13	3.65123e-12	up	--	--	--	K14488|5e-49|pop:POPTR_569631|SAUR;SAUR|SAUR22; SAUR family protein; K14488 SAUR family protein	--	--	Auxin responsive protein	Auxin-responsive protein SAUR32 OS=Arabidopsis thaliana OX=3702 GN=SAUR32 PE=2 SV=1	putative SAUR-like auxin-responsive protein family [Helianthus annuus]
Unigene135034	72.0004	0.573559	-6.25366	1.07872e-15	1.24206e-14	down	--	--	--	K14488|1e-43|pop:POPTR_805651|SAUR;SAUR|SAUR50; SAUR family protein; K14488 SAUR family protein	--	--	Auxin responsive protein	Auxin-responsive protein SAUR32 OS=Arabidopsis thaliana OX=3702 GN=SAUR32 PE=2 SV=1	Auxin responsive SAUR protein [Cynara cardunculus var. scolymus]
Unigene014223	24.0016	81.9854	1.76051	2.44996e-09	1.5121e-08	up	--	--	--	K14488|1e-46|vvi:100255700|SAUR;SAUR|hypothetical protein LOC100255700; K14488 SAUR family protein	--	--	Auxin responsive protein	Auxin-responsive protein SAUR36 OS=Arabidopsis thaliana OX=3702 GN=SAUR36 PE=2 SV=1	auxin-responsive protein SAUR36-like [Lactuca sativa]
Unigene133722	44.14	19.88	-1.13438	0.0008921	0.00232392	down	--	--	--	K14488|8e-43|vvi:100260776|SAUR;SAUR|hypothetical protein LOC100260776; K14488 SAUR family protein	--	--	Auxin responsive protein	Auxin-responsive protein SAUR36 OS=Arabidopsis thaliana OX=3702 GN=SAUR36 PE=2 SV=1	Auxin responsive SAUR protein [Cynara cardunculus var. scolymus]
Unigene184850	100.029	38.9437	-1.34871	3.76804e-08	1.99949e-07	down	--	--	--	K14488|3e-47|vvi:100255700|SAUR;SAUR|hypothetical protein LOC100255700; K14488 SAUR family protein	--	--	Auxin responsive protein	Auxin-responsive protein SAUR36 OS=Arabidopsis thaliana OX=3702 GN=SAUR36 PE=2 SV=1	auxin-responsive protein SAUR36-like [Lactuca sativa]
Unigene046088	0.378789	11.7499	4.00624	0.000132373	0.00040523	up	--	--	--	K14488|4e-46|vvi:100266954|SAUR;SAUR|hypothetical protein LOC100266954; K14488 SAUR family protein	--	--	Auxin responsive protein	Auxin-responsive protein SAUR50 OS=Arabidopsis thaliana OX=3702 GN=SAUR50 PE=1 SV=1	Auxin responsive SAUR protein [Cynara cardunculus var. scolymus]
Unigene041498	6.61531	35.427	2.35942	3.1903e-07	1.48904e-06	up	--	--	--	K14488|4e-52|vvi:100252898|SAUR;SAUR|hypothetical protein LOC100252898; K14488 SAUR family protein	--	--	Auxin responsive protein	Auxin-responsive protein SAUR50 OS=Arabidopsis thaliana OX=3702 GN=SAUR50 PE=1 SV=1	auxin-induced protein 15A-like [Helianthus annuus]
Unigene179956	18.0196	78.764	2.11045	2.09713e-12	1.81791e-11	up	--	--	--	K14488|2e-62|vvi:100242084|SAUR;SAUR|hypothetical protein LOC100242084; K14488 SAUR family protein	--	--	Auxin responsive protein	Auxin-responsive protein SAUR50 OS=Arabidopsis thaliana OX=3702 GN=SAUR50 PE=1 SV=1	auxin-induced protein 6B [Lactuca sativa]
Unigene062476	17.4531	72.0315	2.0157	3.53864e-11	2.70071e-10	up	--	--	--	K14488|3e-41|vvi:100253355|SAUR;SAUR|similar to auxin-responsive family protein; K14488 SAUR family protein	--	--	Auxin responsive protein	Auxin-responsive protein SAUR50 OS=Arabidopsis thaliana OX=3702 GN=SAUR50 PE=1 SV=1	auxin-responsive protein SAUR50-like [Lactuca sativa]
Unigene025126	6.88783	26.4714	1.87602	0.000144035	0.000437702	up	--	--	--	K14488|1e-43|pop:POPTR_818150|SAUR;SAUR|SAUR29; SAUR family protein; K14488 SAUR family protein	--	--	Auxin responsive protein	Auxin-responsive protein SAUR50 OS=Arabidopsis thaliana OX=3702 GN=SAUR50 PE=1 SV=1	auxin-responsive protein SAUR50-like [Helianthus annuus]
Unigene109342	6.55596	0.864879	-2.44078	0.0173388	0.033536	down	--	--	--	K14488|2e-47|vvi:100266954|SAUR;SAUR|hypothetical protein LOC100266954; K14488 SAUR family protein	--	--	Auxin responsive protein	Auxin-responsive protein SAUR50 OS=Arabidopsis thaliana OX=3702 GN=SAUR50 PE=1 SV=1	Auxin responsive SAUR protein [Cynara cardunculus var. scolymus]
Unigene051982	1.49721	16.9409	3.22843	2.86432e-05	9.83827e-05	up	--	--	--	K14488|5e-45|vvi:100244862|SAUR;SAUR|hypothetical protein LOC100244862; K14488 SAUR family protein	--	--	Auxin responsive protein	Auxin-responsive protein SAUR50 OS=Helianthus annuus OX=4232 PE=3 SV=1	auxin-responsive protein SAUR50-like [Helianthus annuus]
Unigene092554	0.360846	6.75024	3.17867	0.00602453	0.0130571	up	--	--	--	--	--	--	Auxin responsive protein	Auxin-responsive protein SAUR66 OS=Arabidopsis thaliana OX=3702 GN=SAUR66 PE=2 SV=1	Auxin responsive SAUR protein [Cynara cardunculus var. scolymus]
Unigene203696	0.378789	5.78688	2.95112	0.0126378	0.0253863	up	--	--	--	K14488|8e-32|vvi:100268140|SAUR;SAUR|hypothetical protein LOC100268140; K14488 SAUR family protein	--	--	Auxin responsive protein	Auxin-responsive protein SAUR71 OS=Arabidopsis thaliana OX=3702 GN=SAUR71 PE=2 SV=1	auxin-responsive protein SAUR50-like [Lactuca sativa]
Unigene162388	69.8602	160.32	1.1947	3.39431e-11	2.59601e-10	up	--	--	Biological Process: response to auxin (GO:0009733);;	K14488|4e-44|vvi:100258180|SAUR;SAUR|hypothetical protein LOC100258180; K14488 SAUR family protein	--	--	Auxin responsive protein	Auxin-responsive protein SAUR72 OS=Arabidopsis thaliana OX=3702 GN=SAUR72 PE=2 SV=1	auxin-responsive protein SAUR71-like [Helianthus annuus]
Gibberellin
GA20
Unigene086730	6.61669	28.5882	2.05347	2.27698e-05	7.95552e-05	up	[R]	General function prediction only	Molecular Function: iron ion binding (GO:0005506);; Molecular Function: oxidoreductase activity, acting on paired donors, with incorporation or reduction of molecular oxygen, 2-oxoglutarate as one donor, and incorporation of one atom each of oxygen into both donors (GO:0016706);; Biological Process: oxidation-reduction process (GO:0055114);;	K05282|9e-50|ath:AT4G25420|E1.14.11.12;EC:1.14.11.12|GA20OX1; gibberellin 20-oxidase (EC:1.14.11.12); K05282 gibberellin 20-oxidase [EC:1.14.11.12]	[QR]	--	2OG-Fe(II) oxygenase superfamily	Gibberellin 20 oxidase 1 OS=Arabidopsis thaliana OX=3702 GN=GA20OX1 PE=2 SV=2	gibberellin 20-oxidase2 [Chrysanthemum x morifolium]
Unigene055446	25.0993	160.215	2.66328	1.51318e-26	3.29058e-25	up	[R]	General function prediction only	Molecular Function: iron ion binding (GO:0005506);; Molecular Function: oxidoreductase activity, acting on paired donors, with incorporation or reduction of molecular oxygen, 2-oxoglutarate as one donor, and incorporation of one atom each of oxygen into both donors (GO:0016706);; Biological Process: oxidation-reduction process (GO:0055114);;	K05282|0.0|rcu:RCOM_1498120|E1.14.11.12;EC:1.14.11.12|gibberellin 20-oxidase, putative (EC:1.14.11.15); K05282 gibberellin 20-oxidase [EC:1.14.11.12]	[QR]	--	2OG-Fe(II) oxygenase superfamily;; non-haem dioxygenase in morphine synthesis N-terminal	Gibberellin 20 oxidase 2 OS=Arabidopsis thaliana OX=3702 GN=GA20OX2 PE=2 SV=1	gibberelin 20-oxidase [Lactuca sativa]
Unigene044274	9.93608	53.2237	2.38437	2.51368e-10	1.74384e-09	up	[R]	General function prediction only	Molecular Function: iron ion binding (GO:0005506);; Molecular Function: oxidoreductase activity, acting on paired donors, with incorporation or reduction of molecular oxygen, 2-oxoglutarate as one donor, and incorporation of one atom each of oxygen into both donors (GO:0016706);; Biological Process: oxidation-reduction process (GO:0055114);;	K05282|1e-164|pop:POPTR_824891|E1.14.11.12;EC:1.14.11.12|GA20ox8; gibberellin 20-oxidase (EC:1.14.11.12); K05282 gibberellin 20-oxidase [EC:1.14.11.12]	[QR]	--	2OG-Fe(II) oxygenase superfamily;; non-haem dioxygenase in morphine synthesis N-terminal	Gibberellin 20 oxidase 2 OS=Arabidopsis thaliana OX=3702 GN=GA20OX2 PE=2 SV=1	gibberellin 20-oxidase2 [Chrysanthemum x morifolium]
Unigene190547	38.8915	128.729	1.71958	4.49059e-15	4.92149e-14	up	[R]	General function prediction only	Molecular Function: iron ion binding (GO:0005506);; Molecular Function: oxidoreductase activity, acting on paired donors, with incorporation or reduction of molecular oxygen, 2-oxoglutarate as one donor, and incorporation of one atom each of oxygen into both donors (GO:0016706);; Biological Process: oxidation-reduction process (GO:0055114);;	K05282|0.0|rcu:RCOM_1498120|E1.14.11.12;EC:1.14.11.12|gibberellin 20-oxidase, putative (EC:1.14.11.15); K05282 gibberellin 20-oxidase [EC:1.14.11.12]	[QR]	--	2OG-Fe(II) oxygenase superfamily;; non-haem dioxygenase in morphine synthesis N-terminal	Gibberellin 20 oxidase 2 OS=Arabidopsis thaliana OX=3702 GN=GA20OX2 PE=2 SV=1	gibberelin 20-oxidase [Lactuca sativa]
GA2
Unigene163796	206.236	69.0022	-1.57132	1.54984e-15	1.76242e-14	down	[Q]	Secondary metabolites biosynthesis, transport and catabolism	Molecular Function: monooxygenase activity (GO:0004497);; Molecular Function: iron ion binding (GO:0005506);; Molecular Function: oxidoreductase activity, acting on paired donors, with incorporation or reduction of molecular oxygen (GO:0016705);; Molecular Function: heme binding (GO:0020037);; Biological Process: oxidation-reduction process (GO:0055114);;	K04122|0.0|rcu:RCOM_1592560|GA3, CYP701;EC:1.14.13.78|ent-kaurene oxidase, putative (EC:1.14.13.78); K04122 ent-kaurene oxidase [EC:1.14.13.78]	[Q]	Secondary metabolites biosynthesis, transport and catabolism	Cytochrome P450	Ent-kaurene oxidase, chloroplastic OS=Arabidopsis thaliana OX=3702 GN=KO PE=1 SV=2	ent-kaurene oxidase CYP701A5 [Stevia rebaudiana]
Unigene112288	6.25861	0.564478	-2.74323	0.013295	0.0264997	down	--	--	Molecular Function: monooxygenase activity (GO:0004497);; Molecular Function: iron ion binding (GO:0005506);; Molecular Function: oxidoreductase activity, acting on paired donors, with incorporation or reduction of molecular oxygen (GO:0016705);; Molecular Function: heme binding (GO:0020037);; Biological Process: oxidation-reduction process (GO:0055114);;	K04122|1e-21|vvi:100255742|GA3, CYP701;EC:1.14.13.78|hypothetical protein LOC100255742; K04122 ent-kaurene oxidase [EC:1.14.13.78]	[Q]	Secondary metabolites biosynthesis, transport and catabolism	--	Ent-kaurene oxidase, chloroplastic OS=Arabidopsis thaliana OX=3702 GN=KO PE=1 SV=2	cytochrome P450 [Cynara cardunculus var. scolymus]
Unigene094289	33.9962	2.34962	-3.68591	1.89343e-10	1.33326e-09	down	--	--	Molecular Function: monooxygenase activity (GO:0004497);; Molecular Function: iron ion binding (GO:0005506);; Molecular Function: oxidoreductase activity, acting on paired donors, with incorporation or reduction of molecular oxygen (GO:0016705);; Molecular Function: heme binding (GO:0020037);; Biological Process: oxidation-reduction process (GO:0055114);;	K04122|1e-32|vvi:100255742|GA3, CYP701;EC:1.14.13.78|hypothetical protein LOC100255742; K04122 ent-kaurene oxidase [EC:1.14.13.78]	[Q]	Secondary metabolites biosynthesis, transport and catabolism	--	Ent-kaurene oxidase 2 OS=Oryza sativa subsp. japonica OX=39947 GN=CYP701A6 PE=1 SV=1	ent-kaurene oxidase CYP701A5 [Stevia rebaudiana]
GA20X
Unigene087393	3.27522	21.0004	2.54181	3.71498e-05	0.000125131	up	[R]	General function prediction only	Molecular Function: iron ion binding (GO:0005506);; Molecular Function: gibberellin 2-beta-dioxygenase activity (GO:0045543);; Biological Process: oxidation-reduction process (GO:0055114);;	K04125|1e-164|pop:POPTR_822902|E1.14.11.13;EC:1.14.11.13|GA2ox6; gibberellin 2-oxidase; K04125 gibberellin 2-oxidase [EC:1.14.11.13]	[QR]	--	2OG-Fe(II) oxygenase superfamily;; non-haem dioxygenase in morphine synthesis N-terminal	Gibberellin 2-beta-dioxygenase 1 OS=Pisum sativum OX=3888 GN=GA2OX1 PE=1 SV=1	gibberellin 2-beta-dioxygenase 1-like [Lactuca sativa]
Unigene098831	6.28483	30.1357	2.19491	1.1745e-05	4.30271e-05	up	[R]	General function prediction only	Molecular Function: iron ion binding (GO:0005506);; Molecular Function: gibberellin 2-beta-dioxygenase activity (GO:0045543);; Biological Process: oxidation-reduction process (GO:0055114);;	K04125|1e-164|pop:POPTR_822902|E1.14.11.13;EC:1.14.11.13|GA2ox6; gibberellin 2-oxidase; K04125 gibberellin 2-oxidase [EC:1.14.11.13]	[QR]	--	2OG-Fe(II) oxygenase superfamily;; non-haem dioxygenase in morphine synthesis N-terminal	Gibberellin 2-beta-dioxygenase 1 OS=Pisum sativum OX=3888 GN=GA2OX1 PE=1 SV=1	gibberellin 2-beta-dioxygenase 1-like [Lactuca sativa]
Unigene052664	23.7228	75.4624	1.65253	7.04927e-09	4.10701e-08	up	[R]	General function prediction only	Molecular Function: iron ion binding (GO:0005506);; Molecular Function: gibberellin 2-beta-dioxygenase activity (GO:0045543);; Biological Process: oxidation-reduction process (GO:0055114);;	K04125|1e-113|pop:POPTR_822902|E1.14.11.13;EC:1.14.11.13|GA2ox6; gibberellin 2-oxidase; K04125 gibberellin 2-oxidase [EC:1.14.11.13]	[QR]	--	non-haem dioxygenase in morphine synthesis N-terminal;; 2OG-Fe(II) oxygenase superfamily;; 2OG-Fe(II) oxygenase superfamily	Gibberellin 2-beta-dioxygenase 1 OS=Pisum sativum OX=3888 GN=GA2OX1 PE=1 SV=1	putative oxoglutarate/iron-dependent dioxygenase [Helianthus annuus]
Unigene203556	70.9855	158.829	1.15814	5.1849e-11	3.88892e-10	up	[R]	General function prediction only	Molecular Function: iron ion binding (GO:0005506);; Molecular Function: gibberellin 2-beta-dioxygenase activity (GO:0045543);; Biological Process: oxidation-reduction process (GO:0055114);;	K04125|1e-112|pop:POPTR_822902|E1.14.11.13;EC:1.14.11.13|GA2ox6; gibberellin 2-oxidase; K04125 gibberellin 2-oxidase [EC:1.14.11.13]	[QR]	--	non-haem dioxygenase in morphine synthesis N-terminal;; 2OG-Fe(II) oxygenase superfamily;; 2OG-Fe(II) oxygenase superfamily	Gibberellin 2-beta-dioxygenase 1 OS=Pisum sativum OX=3888 GN=GA2OX1 PE=1 SV=1	putative oxoglutarate/iron-dependent dioxygenase [Helianthus annuus]
Unigene024016	8.3671	26.0481	1.5897	0.00053485	0.00145711	up	--	--	Biological Process: gibberellin metabolic process (GO:0009685);; Molecular Function: gibberellin 2-beta-dioxygenase activity (GO:0045543);; Molecular Function: metal ion binding (GO:0046872);;	K04125|1e-141|vvi:100248676|E1.14.11.13;EC:1.14.11.13|hypothetical protein LOC100248676	[QR]	--	2OG-Fe(II) oxygenase superfamily;; non-haem dioxygenase in morphine synthesis N-terminal	Gibberellin 2-beta-dioxygenase 2 OS=Pisum sativum OX=3888 GN=GA2OX2 PE=2 SV=1	gibberellin 2-beta-dioxygenase 2 [Helianthus annuus]
Unigene025274	59.704	147.03	1.2958	1.97162e-12	1.714e-11	up	[R]	General function prediction only	--	--	[QR]	--	2OG-Fe(II) oxygenase superfamily;; non-haem dioxygenase in morphine synthesis N-terminal	Gibberellin 2-beta-dioxygenase 8 OS=Arabidopsis thaliana OX=3702 GN=GA2OX8 PE=1 SV=2	gibberellin 2-beta-dioxygenase 8 [Lactuca sativa]
Unigene047922	16.4134	6.78248	-1.23249	0.0237235	0.0440392	down	[R]	General function prediction only	Molecular Function: oxidoreductase activity (GO:0016491);;	K04125|1e-144|vvi:100245189|E1.14.11.13;EC:1.14.11.13|hypothetical protein LOC100245189	[QR]	--	2OG-Fe(II) oxygenase superfamily;; non-haem dioxygenase in morphine synthesis N-terminal	Gibberellin 2-beta-dioxygenase 8 OS=Arabidopsis thaliana OX=3702 GN=GA2OX8 PE=1 SV=2	gibberellin 2-beta-dioxygenase 8-like [Lactuca sativa]
Unigene168580	16.0774	3.5571	-2.0743	0.000924275	0.00240139	down	[R]	General function prediction only	Molecular Function: oxidoreductase activity (GO:0016491);;	K04125|1e-144|vvi:100245189|E1.14.11.13;EC:1.14.11.13|hypothetical protein LOC100245189	[QR]	--	2OG-Fe(II) oxygenase superfamily;; non-haem dioxygenase in morphine synthesis N-terminal	Gibberellin 2-beta-dioxygenase 8 OS=Arabidopsis thaliana OX=3702 GN=GA2OX8 PE=1 SV=2	gibberellin 2-beta-dioxygenase 8-like [Lactuca sativa]
KAO
Unigene192174	15.0045	1.16119	-3.35476	2.09366e-05	7.35907e-05	down	[Q]	Secondary metabolites biosynthesis, transport and catabolism	Molecular Function: monooxygenase activity (GO:0004497);; Molecular Function: iron ion binding (GO:0005506);; Molecular Function: oxidoreductase activity, acting on paired donors, with incorporation or reduction of molecular oxygen (GO:0016705);; Molecular Function: heme binding (GO:0020037);; Biological Process: oxidation-reduction process (GO:0055114);;	K04123|0.0|pop:POPTR_688380|KAO;EC:1.14.13.79|CYP88A9; cytochrome P450 probable ent-kaurenoic acid oxidase (EC:1.14.13.79); K04123 ent-kaurenoic acid hydroxylase [EC:1.14.13.79]	[QI]	--	Cytochrome P450	Ent-kaurenoic acid oxidase 1 OS=Arabidopsis thaliana OX=3702 GN=KAO1 PE=2 SV=1	ent-kaurenoic acid oxidase 1-like isoform X1 [Lactuca sativa]
Unigene060067	0	9.10894	4.39421	0.000117305	0.000362292	up	--	--	--	K04123|7e-08|ath:AT2G32440|KAO;EC:1.14.13.79|KAO2; KAO2 (ENT-KAURENOIC ACID HYDROXYLASE 2); ent-kaurenoate oxidase/ oxygen binding (EC:1.14.13.79); K04123 ent-kaurenoic acid hydroxylase [EC:1.14.13.79]	[QI]	--	--	Ent-kaurenoic acid oxidase 2 OS=Arabidopsis thaliana OX=3702 GN=KAO2 PE=2 SV=2	ent-kaurenoic acid oxidase [Camellia sinensis]
Unigene101354	0	7.00345	3.98139	0.000793905	0.00208845	up	--	--	--	K04123|5e-08|ath:AT2G32440|KAO;EC:1.14.13.79|KAO2; KAO2 (ENT-KAURENOIC ACID HYDROXYLASE 2); ent-kaurenoate oxidase/ oxygen binding (EC:1.14.13.79); K04123 ent-kaurenoic acid hydroxylase [EC:1.14.13.79]	[QI]	--	--	Ent-kaurenoic acid oxidase 2 OS=Arabidopsis thaliana OX=3702 GN=KAO2 PE=2 SV=2	ent-kaurenoic acid oxidase [Camellia sinensis]
Unigene054577	8.82869	33.5888	1.8881	1.23143e-05	4.49676e-05	up	[Q]	Secondary metabolites biosynthesis, transport and catabolism	Molecular Function: monooxygenase activity (GO:0004497);; Molecular Function: iron ion binding (GO:0005506);; Molecular Function: oxidoreductase activity, acting on paired donors, with incorporation or reduction of molecular oxygen (GO:0016705);; Molecular Function: heme binding (GO:0020037);; Biological Process: oxidation-reduction process (GO:0055114);;	K04123|0.0|pop:POPTR_688380|KAO;EC:1.14.13.79|CYP88A9; cytochrome P450 probable ent-kaurenoic acid oxidase (EC:1.14.13.79); K04123 ent-kaurenoic acid hydroxylase [EC:1.14.13.79]	[QI]	--	Cytochrome P450	Ent-kaurenoic acid oxidase 2 OS=Arabidopsis thaliana OX=3702 GN=KAO2 PE=2 SV=2	ent-kaurenoic acid oxidase 1-like isoform X1 [Lactuca sativa]
Unigene190001	22.4008	0	-5.93015	2.13567e-08	1.16996e-07	down	[Q]	Secondary metabolites biosynthesis, transport and catabolism	Molecular Function: oxidoreductase activity (GO:0016491);; Molecular Function: metal ion binding (GO:0046872);;	--	[QI]	--	Cytochrome P450	Ent-kaurenoic acid oxidase 2 OS=Arabidopsis thaliana OX=3702 GN=KAO2 PE=2 SV=2	ent-kaurenoic acid oxidase 1-like [Lactuca sativa]
GID
Unigene048697	0	10.8287	4.64833	3.2991e-05	0.000112205	up	--	--	--	K14493|1e-19|rcu:RCOM_0646940|GID1;EC:3.-.-.-|Gibberellin receptor GID1, putative; K14493 gibberellin receptor GID1 [EC:3.-.-.-]	[V]	Defense mechanisms	--	Gibberellin receptor GID1C OS=Arabidopsis thaliana OX=3702 GN=GID1C PE=1 SV=1	Alpha/beta hydrolase fold-3 [Cynara cardunculus var. scolymus]
Unigene134568	18.2466	6.68488	-1.39535	0.00657714	0.0141327	down	--	--	Biological Process: metabolic process (GO:0008152);; Molecular Function: carboxylic ester hydrolase activity (GO:0052689);;	--	[V]	Defense mechanisms	--	Gibberellin receptor GID1 OS=Oryza sativa subsp. japonica OX=39947 GN=GID1 PE=1 SV=1	hypothetical protein Ccrd_003508 [Cynara cardunculus var. scolymus]
DELLA
Unigene057749	0.378789	12.9242	4.13303	6.92731e-05	0.000222583	up	--	--	Molecular Function: transcription factor activity, transcription factor binding (GO:0000989);; Cellular Component: nucleus (GO:0005634);; Biological Process: regulation of transcription, DNA-templated (GO:0006355);;	--	--	--	GRAS domain family;; Transcriptional regulator DELLA protein N terminal	DELLA protein GAI OS=Arabidopsis thaliana OX=3702 GN=GAI PE=1 SV=1	DELLA protein GAI-like [Helianthus annuus]
Unigene148790	35.5611	93.4593	1.38707	7.25e-09	4.21814e-08	up	--	--	Molecular Function: transcription factor activity, transcription factor binding (GO:0000989);; Cellular Component: nucleus (GO:0005634);; Biological Process: regulation of transcription, DNA-templated (GO:0006355);;	K14494|1e-159|pop:POPTR_645273|DELLA;DELLA|GRAS87; DELLA domain GRAS family transcription factor rga-like protein; K14494 DELLA protein	--	--	GRAS domain family;; Transcriptional regulator DELLA protein N terminal	DELLA protein GAI OS=Solanum lycopersicum OX=4081 GN=GAI PE=2 SV=1	Transcriptional factor DELLA, N-terminal [Cynara cardunculus var. scolymus]
Unigene144479	4.70205	0	-3.48335	0.00707767	0.0150752	down	--	--	Biological Process: transcription, DNA-templated (GO:0006351);;	K14494|1e-07|sbi:SORBI_01g010660|DELLA;DELLA|hypothetical protein; K14494 DELLA protein	--	--	--	DELLA protein GAI OS=Solanum lycopersicum OX=4081 GN=GAI PE=2 SV=1	PREDICTED: DELLA protein GAI-like [Ipomoea nil]
Unigene052089	0	27.9013	5.95787	1.27938e-08	7.21368e-08	up	--	--	--	K14494|8e-26|pop:POPTR_719856|DELLA;DELLA|GRAS86; DELLA domain GRAS family transcription factor, GA insensitive (GAI), GA1-3 1 (RGA1) repressor protein; K14494 DELLA protein	--	--	GRAS domain family	DELLA protein GAI1 OS=Vitis vinifera OX=29760 GN=GAI1 PE=2 SV=1	GAI-like protein 1, partial [Vitis betulifolia]
Unigene078092	6.21858	28.9549	2.15051	1.21321e-05	4.43437e-05	up	--	--	--	--	--	--	GRAS domain family	DELLA protein GAI1 OS=Vitis vinifera OX=29760 GN=GAI1 PE=2 SV=1	DELLA protein RGL1-like [Helianthus annuus]
Unigene040853	323.717	1045.75	1.68949	3.59385e-103	6.4269e-101	up	--	--	Molecular Function: transcription factor activity, transcription factor binding (GO:0000989);; Cellular Component: nucleus (GO:0005634);; Biological Process: regulation of transcription, DNA-templated (GO:0006355);;	K14494|0.0|vvi:100232937|DELLA;DELLA|VvGAI1; GAI1; K14494 DELLA protein	--	--	GRAS domain family;; Transcriptional regulator DELLA protein N terminal	DELLA protein GAI1 OS=Vitis vinifera OX=29760 GN=GAI1 PE=2 SV=1	DELLA protein GAI1-like [Lactuca sativa]
Unigene172220	233.548	661.748	1.50033	1.86123e-59	1.28923e-57	up	--	--	Molecular Function: transcription factor activity, transcription factor binding (GO:0000989);; Cellular Component: nucleus (GO:0005634);; Biological Process: regulation of transcription, DNA-templated (GO:0006355);;	K14494|0.0|vvi:100232937|DELLA;DELLA|VvGAI1; GAI1; K14494 DELLA protein	--	--	GRAS domain family;; Transcriptional regulator DELLA protein N terminal	DELLA protein GAI1 OS=Vitis vinifera OX=29760 GN=GAI1 PE=2 SV=1	DELLA protein GAI1-like [Lactuca sativa]
Unigene040716	161.21	343.142	1.08902	2.78941e-18	3.8457e-17	up	--	--	Biological Process: transcription, DNA-templated (GO:0006351);;	K14494|1e-178|vvi:100232937|DELLA;DELLA|VvGAI1; GAI1; K14494 DELLA protein	--	--	GRAS domain family;; Transcriptional regulator DELLA protein N terminal	DELLA protein GAI1 OS=Vitis vinifera OX=29760 GN=GAI1 PE=2 SV=1	Transcriptional factor DELLA, N-terminal [Cynara cardunculus var. scolymus]
Unigene192408	7.67577	0.916168	-2.63147	0.00846302	0.017725	down	--	--	--	--	--	--	Transcriptional regulator DELLA protein N terminal	DELLA protein GAI1 OS=Vitis vinifera OX=29760 GN=GAI1 PE=2 SV=1	DELLA protein GAI1-like [Lactuca sativa]
Unigene108036	134.107	8.47002	-3.92914	3.43766e-34	1.04554e-32	down	--	--	--	--	--	--	GRAS domain family	DELLA protein GAI1 OS=Vitis vinifera OX=29760 GN=GAI1 PE=2 SV=1	DELLA protein RGL2-like [Lactuca sativa]
Unigene054185	4.40883	22.3799	2.24816	6.82746e-05	0.000219636	up	--	--	--	--	--	--	GRAS domain family;; GRAS domain family	DELLA protein RGA OS=Arabidopsis thaliana OX=3702 GN=RGA PE=1 SV=1	DELLA protein RGL2-like [Lactuca sativa]
Unigene006083	15.7565	5.88856	-1.36588	0.0144318	0.0284496	down	--	--	--	--	--	--	GRAS domain family	DELLA protein RGL1 OS=Arabidopsis thaliana OX=3702 GN=RGL1 PE=1 SV=1	DELLA protein RGL1-like [Helianthus annuus]
Unigene062671	1.45581	19.3287	3.42323	5.64566e-06	2.17453e-05	up	--	--	--	--	--	--	GRAS domain family	DELLA protein RGL2 OS=Arabidopsis thaliana OX=3702 GN=RGL2 PE=1 SV=2	DELLA protein RGL2-like [Lactuca sativa]
TFs
Unigene182713	238.29	71.9041	-1.72559	7.99714e-24	1.52119e-22	down	--	--	Molecular Function: double-stranded DNA binding (GO:0003690);; Molecular Function: DNA-binding transcription factor activity (GO:0003700);; Cellular Component: nucleus (GO:0005634);; Biological Process: mRNA export from nucleus (GO:0006406);; Biological Process: positive regulation of cell proliferation (GO:0008284);; Biological Process: red, far-red light phototransduction (GO:0009585);; Biologi…	--	[K]	Transcription	bZIP transcription factor;; Basic region leucine zipper	Transcription factor HY5 OS=Arabidopsis thaliana OX=3702 GN=HY5 PE=1 SV=1	transcription factor HY5-like [Lactuca sativa]
Unigene059520	135.842	22.4646	-2.57477	4.70333e-25	9.53529e-24	down	--	--	Molecular Function: DNA-binding transcription factor activity (GO:0003700);; Cellular Component: nucleus (GO:0005634);; Biological Process: regulation of transcription, DNA-templated (GO:0006355);; Biological Process: mRNA transcription (GO:0009299);; Biological Process: response to cytokinin (GO:0009735);; Biological Process: gibberellic acid mediated signaling pathway (GO:0009740);; Biological …	--	--	--	--	Transcription factor HBI1 OS=Arabidopsis thaliana OX=3702 GN=HBI1 PE=1 SV=3	transcription factor BEE 2-like [Lactuca sativa]
Unigene204089	83.2115	6.8188	-3.55533	2.40975e-20	3.7745e-19	down	--	--	--	--	--	--	--	Transcription factor HBI1 OS=Arabidopsis thaliana OX=3702 GN=HBI1 PE=1 SV=3	hypothetical protein Ccrd_012800 [Cynara cardunculus var. scolymus]
Unigene052332	49.2243	107.937	1.13044	3.76429e-07	1.73786e-06	up	--	--	Biological Process: response to abiotic stimulus (GO:0009628);; Biological Process: cellular process (GO:0009987);; Biological Process: biological_process (GO:0044699);; Biological Process: regulation of biological process (GO:0050789);;	K12126|7e-95|vvi:100247781|PIF3;PIF3|hypothetical protein LOC100247781	--	--	Helix-loop-helix DNA-binding domain	Transcription factor PIF3 OS=Arabidopsis thaliana OX=3702 GN=PIF3 PE=1 SV=1	Basic helix-loop-helix leucine zipper transcription factor [Cynara cardunculus var. scolymus]
ABA
ABA
Unigene076065	16.8625	6.0782	-1.40682	0.00943	0.0194818	down	[HC]	--	Cellular Component: chloroplast (GO:0009507);; Molecular Function: zeaxanthin epoxidase [overall] activity (GO:0009540);; Biological Process: abscisic acid biosynthetic process (GO:0009688);; Cellular Component: membrane (GO:0016020);; Molecular Function: zeaxanthin epoxidase activity (GO:0052662);; Molecular Function: antheraxanthin epoxidase activity (GO:0052663);; Biological Process: oxidation…	K09838|6e-52|rcu:RCOM_1408430|ZEP, ABA1;EC:1.14.15.21|zeaxanthin epoxidase, putative (EC:1.14.13.90); K09838 zeaxanthin epoxidase [EC:1.14.13.90]	[CR]	--	FAD binding domain	Zeaxanthin epoxidase, chloroplastic OS=Capsicum annuum OX=4072 PE=2 SV=1	zeaxanthin epoxidase 1 [Bixa orellana]
Unigene207972	188.462	68.7036	-1.45056	2.45033e-18	3.38984e-17	down	[HC]	--	Biological Process: metabolic process (GO:0008152);;	K09838|1e-111|osa:4335984|ZEP, ABA1;EC:1.14.15.21|Os04g0448900; K09838 zeaxanthin epoxidase [EC:1.14.13.90]	[CR]	--	NAD(P)-binding Rossmann-like domain;; FAD binding domain;; FAD binding domain	Zeaxanthin epoxidase, chloroplastic OS=Oryza sativa subsp. japonica OX=39947 GN=ZEP PE=2 SV=1	PREDICTED: zeaxanthin epoxidase, chloroplastic-like isoform X3 [Lupinus angustifolius]
Unigene199179	472.083	69.8962	-2.75357	1.87336e-92	2.72732e-90	down	--	--	Cellular Component: chloroplast (GO:0009507);; Molecular Function: zeaxanthin epoxidase [overall] activity (GO:0009540);; Biological Process: abscisic acid biosynthetic process (GO:0009688);; Cellular Component: membrane (GO:0016020);; Molecular Function: zeaxanthin epoxidase activity (GO:0052662);; Molecular Function: antheraxanthin epoxidase activity (GO:0052663);; Biological Process: oxidation…	K09838|1e-33|vvi:100232944|ZEP, ABA1;EC:1.14.15.21|ZEP; zeaxanthin epoxidase; K09838 zeaxanthin epoxidase [EC:1.14.13.90]	[CR]	--	--	Zeaxanthin epoxidase, chloroplastic OS=Solanum lycopersicum OX=4081 PE=2 SV=1	PREDICTED: zeaxanthin epoxidase, chloroplastic-like [Brassica rapa]
Unigene113616	6.48006	0	-4.00706	0.00119468	0.00302904	down	--	--	Molecular Function: iron ion binding (GO:0005506);; Cellular Component: plastid (GO:0009536);; Molecular Function: oxidoreductase activity, acting on paired donors, with incorporation or reduction of molecular oxygen, NAD(P)H as one donor, and incorporation of one atom of oxygen (GO:0016709);; Molecular Function: heme binding (GO:0020037);; Biological Process: oxidation-reduction process (GO:0055…	--	[QI]	--	--	Zeaxanthin epoxidase, chloroplastic OS=Spinacia oleracea OX=3562 GN=SOVF_077800 PE=1 SV=1	hypothetical protein Ccrd_002470 [Cynara cardunculus var. scolymus]
Unigene112926	3.63607	0	-3.06474	0.0218166	0.0409401	down	--	--	--	--	[CR]	--	--	Zeaxanthin epoxidase, chloroplastic OS=Arabidopsis thaliana OX=3702 GN=ZEP PE=1 SV=1	zeaxanthin epoxidase, chloroplastic-like [Helianthus annuus]
NCED
Unigene045943	9.1509	23.6032	1.32486	0.0053807	0.0117994	up	[Q]	Secondary metabolites biosynthesis, transport and catabolism	Molecular Function: dioxygenase activity (GO:0051213);; Biological Process: oxidation-reduction process (GO:0055114);;	K09840|0.0|vvi:100267016|NCED;EC:1.13.11.51|hypothetical protein LOC100267016; K09840 9-cis-epoxycarotenoid dioxygenase [EC:1.13.11.51]	[Q]	Secondary metabolites biosynthesis, transport and catabolism	Retinal pigment epithelial membrane protein	9-cis-epoxycarotenoid dioxygenase NCED1, chloroplastic OS=Phaseolus vulgaris OX=3885 GN=NCED1 PE=2 SV=1	9-cis-epoxycarotenoid dioxygenase NCED1, chloroplastic-like [Lactuca sativa]
Unigene088036	25.8362	62.6676	1.26978	3.48396e-05	0.000117988	up	[Q]	Secondary metabolites biosynthesis, transport and catabolism	Molecular Function: dioxygenase activity (GO:0051213);; Biological Process: oxidation-reduction process (GO:0055114);;	K09840|0.0|vvi:100267016|NCED;EC:1.13.11.51|hypothetical protein LOC100267016; K09840 9-cis-epoxycarotenoid dioxygenase [EC:1.13.11.51]	[Q]	Secondary metabolites biosynthesis, transport and catabolism	Retinal pigment epithelial membrane protein	9-cis-epoxycarotenoid dioxygenase NCED3, chloroplastic OS=Arabidopsis thaliana OX=3702 GN=NCED3 PE=2 SV=1	Lactuca sativa 9-cis-epoxycarotenoid dioxygenase 2
AAO	L-ascorbate oxidase
Unigene048152	2.18026	40.7918	4.00293	6.09274e-11	4.53419e-10	up	--	--	Molecular Function: copper ion binding (GO:0005507);; Cellular Component: cell wall (GO:0005618);; Molecular Function: oxidoreductase activity (GO:0016491);; Biological Process: oxidation-reduction process (GO:0055114);;	--	[Q]	Secondary metabolites biosynthesis, transport and catabolism	--	L-ascorbate oxidase homolog OS=Brassica napus OX=3708 GN=Bp10 PE=2 SV=1	putative SKU5 similar 17 [Helianthus annuus]
Unigene078430	0	5.89445	3.65217	0.00317422	0.00735299	up	--	--	--	--	[Q]	Secondary metabolites biosynthesis, transport and catabolism	--	L-ascorbate oxidase homolog OS=Brassica napus OX=3708 GN=Bp10 PE=2 SV=1	L-ascorbate oxidase homolog [Lactuca sativa]
Unigene088656	1.8553	21.8702	3.32961	2.37294e-06	9.70085e-06	up	--	--	--	--	[Q]	Secondary metabolites biosynthesis, transport and catabolism	--	L-ascorbate oxidase homolog OS=Brassica napus OX=3708 GN=Bp10 PE=2 SV=1	L-ascorbate oxidase homolog [Helianthus annuus]
Unigene118968	10.9386	95.9255	3.08754	2.19523e-21	3.65185e-20	up	[Q]	Secondary metabolites biosynthesis, transport and catabolism	Molecular Function: copper ion binding (GO:0005507);; Molecular Function: oxidoreductase activity (GO:0016491);; Biological Process: oxidation-reduction process (GO:0055114);;	--	[Q]	Secondary metabolites biosynthesis, transport and catabolism	Multicopper oxidase;; Multicopper oxidase;; Multicopper oxidase	L-ascorbate oxidase homolog OS=Brassica napus OX=3708 GN=Bp10 PE=2 SV=1	L-ascorbate oxidase homolog [Helianthus annuus]
Unigene112402	0	3.83026	2.95315	0.0251163	0.0462784	up	--	--	Molecular Function: copper ion binding (GO:0005507);; Molecular Function: oxidoreductase activity (GO:0016491);; Biological Process: oxidation-reduction process (GO:0055114);;	--	[Q]	Secondary metabolites biosynthesis, transport and catabolism	--	L-ascorbate oxidase homolog OS=Nicotiana tabacum OX=4097 PE=2 SV=1	hypothetical protein Ccrd_010221 [Cynara cardunculus var. scolymus]
Unigene015717	116.454	629.395	2.42832	1.24953e-101	2.15427e-99	up	[Q]	Secondary metabolites biosynthesis, transport and catabolism	Molecular Function: copper ion binding (GO:0005507);; Molecular Function: oxidoreductase activity (GO:0016491);; Biological Process: oxidation-reduction process (GO:0055114);;	--	[Q]	Secondary metabolites biosynthesis, transport and catabolism	Multicopper oxidase;; Multicopper oxidase;; Multicopper oxidase	L-ascorbate oxidase homolog OS=Nicotiana tabacum OX=4097 PE=2 SV=1	Cupredoxin, partial [Cynara cardunculus var. scolymus]
Unigene026291	124.192	665.069	2.41608	9.46073e-102	1.63869e-99	up	[Q]	Secondary metabolites biosynthesis, transport and catabolism	Molecular Function: copper ion binding (GO:0005507);; Cellular Component: plant-type cell wall (GO:0009505);; Molecular Function: oxidoreductase activity (GO:0016491);; Biological Process: oxidation-reduction process (GO:0055114);;	--	[Q]	Secondary metabolites biosynthesis, transport and catabolism	Multicopper oxidase;; Multicopper oxidase;; Multicopper oxidase;; Multicopper oxidase	L-ascorbate oxidase homolog OS=Nicotiana tabacum OX=4097 PE=2 SV=1	L-ascorbate oxidase homolog [Helianthus annuus]
Unigene094729	40.3128	154.004	1.92425	3.00866e-20	4.68891e-19	up	[Q]	Secondary metabolites biosynthesis, transport and catabolism	Molecular Function: copper ion binding (GO:0005507);; Molecular Function: oxidoreductase activity (GO:0016491);; Biological Process: oxidation-reduction process (GO:0055114);;	--	[Q]	Secondary metabolites biosynthesis, transport and catabolism	Multicopper oxidase;; Multicopper oxidase	L-ascorbate oxidase homolog OS=Brassica napus OX=3708 GN=Bp10 PE=2 SV=1	L-ascorbate oxidase homolog [Helianthus annuus]
Unigene125737	109.899	350.143	1.6697	1.67824e-37	5.8464e-36	up	[Q]	Secondary metabolites biosynthesis, transport and catabolism	Molecular Function: copper ion binding (GO:0005507);; Cellular Component: plant-type cell wall (GO:0009505);; Molecular Function: oxidoreductase activity (GO:0016491);; Biological Process: oxidation-reduction process (GO:0055114);;	--	[Q]	Secondary metabolites biosynthesis, transport and catabolism	Multicopper oxidase;; Multicopper oxidase;; Multicopper oxidase	L-ascorbate oxidase homolog OS=Nicotiana tabacum OX=4097 PE=2 SV=1	hypothetical protein LSAT_4X168161 [Lactuca sativa]
Unigene008241	55.3615	131.731	1.24749	3.32292e-10	2.27272e-09	up	[Q]	Secondary metabolites biosynthesis, transport and catabolism	Molecular Function: copper ion binding (GO:0005507);; Molecular Function: L-ascorbate oxidase activity (GO:0008447);; Biological Process: oxidation-reduction process (GO:0055114);;	--	[Q]	Secondary metabolites biosynthesis, transport and catabolism	Multicopper oxidase;; Multicopper oxidase;; Multicopper oxidase	L-ascorbate oxidase homolog OS=Brassica napus OX=3708 GN=Bp10 PE=2 SV=1	L-ascorbate oxidase homolog [Lactuca sativa]
Unigene020392	59.5475	140.056	1.22945	6.19908e-09	3.637e-08	up	[Q]	Secondary metabolites biosynthesis, transport and catabolism	Molecular Function: copper ion binding (GO:0005507);; Molecular Function: oxidoreductase activity (GO:0016491);; Biological Process: oxidation-reduction process (GO:0055114);;	--	[Q]	Secondary metabolites biosynthesis, transport and catabolism	Multicopper oxidase;; Multicopper oxidase;; Multicopper oxidase	L-ascorbate oxidase homolog OS=Nicotiana tabacum OX=4097 PE=2 SV=1	L-ascorbate oxidase homolog [Helianthus annuus]
Unigene083270	10.2486	22.6906	1.11929	0.0145826	0.0287127	up	[Q]	Secondary metabolites biosynthesis, transport and catabolism	Molecular Function: copper ion binding (GO:0005507);; Molecular Function: oxidoreductase activity (GO:0016491);; Biological Process: oxidation-reduction process (GO:0055114);;	--	[Q]	Secondary metabolites biosynthesis, transport and catabolism	Multicopper oxidase;; Multicopper oxidase;; Multicopper oxidase	L-ascorbate oxidase homolog OS=Brassica napus OX=3708 GN=Bp10 PE=2 SV=1	L-ascorbate oxidase homolog [Helianthus annuus]
Unigene121103	565.442	255.642	-1.1447	1.2736e-35	4.12845e-34	down	[Q]	Secondary metabolites biosynthesis, transport and catabolism	Molecular Function: copper ion binding (GO:0005507);; Cellular Component: extracellular region (GO:0005576);; Molecular Function: L-ascorbate oxidase activity (GO:0008447);; Biological Process: oxidation-reduction process (GO:0055114);;	--	[Q]	Secondary metabolites biosynthesis, transport and catabolism	Multicopper oxidase;; Multicopper oxidase;; Multicopper oxidase	L-ascorbate oxidase OS=Cucumis sativus OX=3659 PE=1 SV=1	L-ascorbate oxidase-like [Helianthus annuus]
Unigene192901	33.9203	10.6541	-1.64586	4.87339e-05	0.000160786	down	--	--	Molecular Function: copper ion binding (GO:0005507);; Cellular Component: extracellular region (GO:0005576);; Molecular Function: oxidoreductase activity (GO:0016491);; Biological Process: oxidation-reduction process (GO:0055114);;	K00423|1e-115|vvi:100251280|E1.10.3.3;EC:1.10.3.3|hypothetical protein LOC100251280; K00423 L-ascorbate oxidase [EC:1.10.3.3]	[Q]	Secondary metabolites biosynthesis, transport and catabolism	Multicopper oxidase	L-ascorbate oxidase OS=Nicotiana tabacum OX=4097 GN=AAO PE=2 SV=1	L-ascorbate oxidase-like [Helianthus annuus]
Unigene135979	16.007	0	-5.47115	4.19743e-07	1.92313e-06	down	--	--	--	--	[Q]	Secondary metabolites biosynthesis, transport and catabolism	--	L-ascorbate oxidase homolog OS=Nicotiana tabacum OX=4097 PE=2 SV=1	L-ascorbate oxidase homolog [Helianthus annuus]
PYL	Abscisic acid receptor PYL
Unigene150226	13.8571	35.0167	1.30893	0.00115125	0.00292761	up	--	--	--	K14496|1e-101|vvi:100267793|PYL;PYL|hypothetical protein LOC100267793; K14496 abscisic acid receptor PYR/PYL family	--	--	Polyketide cyclase / dehydrase and lipid transport;; Polyketide cyclase / dehydrase and lipid transport	Abscisic acid receptor PYL1 OS=Arabidopsis thaliana OX=3702 GN=PYL1 PE=1 SV=1	abscisic acid receptor PYR1-like [Lactuca sativa]
Unigene091172	13.9068	29.8388	1.08122	0.00537875	0.0117955	up	--	--	--	K14496|1e-101|vvi:100267793|PYL;PYL|hypothetical protein LOC100267793; K14496 abscisic acid receptor PYR/PYL family	--	--	Polyketide cyclase / dehydrase and lipid transport;; Polyketide cyclase / dehydrase and lipid transport	Abscisic acid receptor PYL1 OS=Arabidopsis thaliana OX=3702 GN=PYL1 PE=1 SV=1	abscisic acid receptor PYR1-like [Lactuca sativa]
Unigene065337	0.360846	6.14855	3.05538	0.00898634	0.0186854	up	--	--	--	K14496|1e-100|rcu:RCOM_0797770|PYL;PYL|hypothetical protein; K14496 abscisic acid receptor PYR/PYL family	--	--	Polyketide cyclase / dehydrase and lipid transport	Abscisic acid receptor PYL2 OS=Arabidopsis thaliana OX=3702 GN=PYL2 PE=1 SV=1	abscisic acid receptor PYL2-like [Lactuca sativa]
Unigene019690	5.52035	85.443	3.71428	3.58738e-08	1.90791e-07	up	--	--	--	K14496|2e-82|vvi:100267073|PYL;PYL|hypothetical protein LOC100267073; K14496 abscisic acid receptor PYR/PYL family	--	--	Polyketide cyclase / dehydrase and lipid transport;; Pathogenesis-related protein Bet v I family;; Polyketide cyclase / dehydrase and lipid transport	Abscisic acid receptor PYL4 OS=Arabidopsis thaliana OX=3702 GN=PYL4 PE=1 SV=1	Polyketide cyclase/dehydrase [Cynara cardunculus var. scolymus]
Unigene108788	6.96788	44.0899	2.60303	1.22305e-09	7.82348e-09	up	--	--	Molecular Function: signaling receptor activity (GO:0004872);; Cellular Component: nucleus (GO:0005634);; Cellular Component: cytoplasm (GO:0005737);; Biological Process: abscisic acid-activated signaling pathway (GO:0009738);; Molecular Function: abscisic acid binding (GO:0010427);; Molecular Function: protein homodimerization activity (GO:0042803);;	K14496|5e-81|rcu:RCOM_0847730|PYL;PYL|hypothetical protein; K14496 abscisic acid receptor PYR/PYL family	--	--	Polyketide cyclase / dehydrase and lipid transport;; Pathogenesis-related protein Bet v I family;; Polyketide cyclase / dehydrase and lipid transport	Abscisic acid receptor PYL4 OS=Arabidopsis thaliana OX=3702 GN=PYL4 PE=1 SV=1	abscisic acid receptor PYL4-like [Lactuca sativa]
Unigene183792	32.9855	86.5525	1.38379	1.38444e-08	7.77072e-08	up	--	--	--	K14496|1e-100|vvi:100267073|PYL;PYL|hypothetical protein LOC100267073; K14496 abscisic acid receptor PYR/PYL family	--	--	Polyketide cyclase / dehydrase and lipid transport;; Pathogenesis-related protein Bet v I family	Abscisic acid receptor PYL4 OS=Arabidopsis thaliana OX=3702 GN=PYL4 PE=1 SV=1	Polyketide cyclase/dehydrase [Cynara cardunculus var. scolymus]
Unigene056798	117.353	297.191	1.3367	3.53995e-23	6.50084e-22	up	--	--	--	K14496|6e-93|pop:POPTR_907261|PYL;PYL|hypothetical protein; K14496 abscisic acid receptor PYR/PYL family	--	--	Polyketide cyclase / dehydrase and lipid transport;; Pathogenesis-related protein Bet v I family;; Polyketide cyclase / dehydrase and lipid transport	Abscisic acid receptor PYL4 OS=Arabidopsis thaliana OX=3702 GN=PYL4 PE=1 SV=1	Polyketide cyclase/dehydrase [Cynara cardunculus var. scolymus]
Unigene014012	0	54.5836	6.83416	2.72911e-11	2.11004e-10	up	--	--	--	K14496|9e-08|pop:POPTR_824546|PYL;PYL|hypothetical protein; K14496 abscisic acid receptor PYR/PYL family	--	--	--	Abscisic acid receptor PYL8 OS=Arabidopsis thaliana OX=3702 GN=PYL8 PE=1 SV=1	PREDICTED: abscisic acid receptor PYL8-like isoform X2 [Populus euphratica]
Unigene088456	7.31768	25.4704	1.74765	0.00023495	0.000686047	up	--	--	--	K14496|2e-27|rcu:RCOM_0719410|PYL;PYL|hypothetical protein; K14496 abscisic acid receptor PYR/PYL family	--	--	Polyketide cyclase / dehydrase and lipid transport	Abscisic acid receptor PYL8 OS=Arabidopsis thaliana OX=3702 GN=PYL8 PE=1 SV=1	Polyketide cyclase/dehydrase [Cynara cardunculus var. scolymus]
Unigene061083	4.77519	14.6658	1.54062	0.0124995	0.0251327	up	--	--	--	K14496|2e-31|rcu:RCOM_1691820|PYL;PYL|hypothetical protein; K14496 abscisic acid receptor PYR/PYL family	--	--	Polyketide cyclase / dehydrase and lipid transport	Abscisic acid receptor PYL8 OS=Arabidopsis thaliana OX=3702 GN=PYL8 PE=1 SV=1	abscisic acid receptor PYL8-like [Helianthus annuus]
Unigene031472	555.379	252.717	-1.13428	1.69768e-30	4.45961e-29	down	--	--	--	K14496|4e-36|pop:POPTR_816630|PYL;PYL|hypothetical protein; K14496 abscisic acid receptor PYR/PYL family	--	--	--	Abscisic acid receptor PYL9 OS=Arabidopsis thaliana OX=3702 GN=PYL9 PE=1 SV=1	abscisic acid receptor PYL9 [Lactuca sativa]
Unigene195622	569.97	248.979	-1.19226	4.94851e-36	1.62892e-34	down	--	--	--	K14496|4e-36|pop:POPTR_816630|PYL;PYL|hypothetical protein; K14496 abscisic acid receptor PYR/PYL family	--	--	--	Abscisic acid receptor PYL9 OS=Arabidopsis thaliana OX=3702 GN=PYL9 PE=1 SV=1	abscisic acid receptor PYL9 [Lactuca sativa]
Unigene204727	6.56562	0.282239	-3.40646	0.00310706	0.00721078	down	--	--	--	K14496|2e-11|pop:POPTR_830866|PYL;PYL|hypothetical protein; K14496 abscisic acid receptor PYR/PYL family	--	--	--	Abscisic acid receptor PYL9 OS=Arabidopsis thaliana OX=3702 GN=PYL9 PE=1 SV=1	probable L-type lectin-domain containing receptor kinase S.5 [Lactuca sativa]
Unigene019404	1.44063	25.8585	3.83238	1.39381e-07	6.84812e-07	up	--	--	--	K14496|7e-09|rcu:RCOM_1691820|PYL;PYL|hypothetical protein; K14496 abscisic acid receptor PYR/PYL family	--	--	--	Abscisic acid receptor PYL10 OS=Arabidopsis thaliana OX=3702 GN=PYL10 PE=1 SV=1	Polyketide cyclase/dehydrase [Cynara cardunculus var. scolymus]
PYR	Abscisic acid receptor PYR
Unigene144895	45.2818	95.7133	1.07056	1.47999e-06	6.23804e-06	up	--	--	--	K14496|5e-65|vvi:100267793|PYL;PYL|hypothetical protein LOC100267793; K14496 abscisic acid receptor PYR/PYL family	--	--	Polyketide cyclase / dehydrase and lipid transport;; Polyketide cyclase / dehydrase and lipid transport	Abscisic acid receptor PYR1 OS=Arabidopsis thaliana OX=3702 GN=PYR1 PE=1 SV=1	Polyketide cyclase/dehydrase [Cynara cardunculus var. scolymus]
SNRK2	Serine/threonine-protein kinase SRK2
Unigene034557	309.168	104.183	-1.56626	1.283e-33	3.80798e-32	down	--	--	Molecular Function: protein serine/threonine kinase activity (GO:0004674);; Molecular Function: ATP binding (GO:0005524);; Biological Process: protein phosphorylation (GO:0006468);;	K14498|2e-31|vvi:100259302|SNRK2;EC:2.7.11.1|hypothetical protein LOC100259302; K14498 serine/threonine-protein kinase SRK2 [EC:2.7.11.1]	[T]	Signal transduction mechanisms	--	Serine/threonine-protein kinase SRK2A OS=Arabidopsis thaliana OX=3702 GN=SRK2A PE=1 SV=1	Protein kinase, ATP binding site-containing protein [Cynara cardunculus var. scolymus]
Unigene117897	55.4946	1.76698	-4.74366	8.13603e-16	9.44477e-15	down	--	--	Molecular Function: nucleotide binding (GO:0000166);; Molecular Function: protein kinase activity (GO:0004672);; Biological Process: ion transport (GO:0006811);; Biological Process: response to stress (GO:0006950);; Biological Process: phosphorylation (GO:0016310);;	K14498|1e-62|vvi:100249013|SNRK2;EC:2.7.11.1|hypothetical protein LOC100249013; K14498 serine/threonine-protein kinase SRK2 [EC:2.7.11.1]	[T]	Signal transduction mechanisms	--	Serine/threonine-protein kinase SRK2A OS=Arabidopsis thaliana OX=3702 GN=SRK2A PE=1 SV=1	serine/threonine-protein kinase SAPK7-like [Lactuca sativa]
Unigene192457	15.9587	35.3335	1.1209	0.00287935	0.00672607	up	--	--	Molecular Function: isochorismate synthase activity (GO:0008909);; Biological Process: biosynthetic process (GO:0009058);;	K14498|1e-11|vvi:100244991|SNRK2;EC:2.7.11.1|hypothetical protein LOC100244991; K14498 serine/threonine-protein kinase SRK2 [EC:2.7.11.1]	[T]	Signal transduction mechanisms	--	Serine/threonine-protein kinase SRK2A OS=Physcomitrella patens subsp. patens OX=3218 GN=SRK2A PE=1 SV=1	isochorismate synthase [Artemisia annua]
Unigene188076	29.7544	6.7725	-2.07026	3.17097e-05	0.000108146	down	--	--	Molecular Function: protein serine/threonine kinase activity (GO:0004674);; Molecular Function: ATP binding (GO:0005524);; Biological Process: protein phosphorylation (GO:0006468);;	--	[T]	Signal transduction mechanisms	--	Serine/threonine-protein kinase SRK2B OS=Arabidopsis thaliana OX=3702 GN=SRK2B PE=1 SV=1	Protein kinase, ATP binding site-containing protein [Cynara cardunculus var. scolymus]
Unigene146494	5.93226	0.282239	-3.18409	0.00794662	0.01676	down	--	--	Molecular Function: protein kinase activity (GO:0004672);; Molecular Function: ATP binding (GO:0005524);; Biological Process: protein phosphorylation (GO:0006468);;	--	[T]	Signal transduction mechanisms	--	Serine/threonine-protein kinase SRK2B OS=Arabidopsis thaliana OX=3702 GN=SRK2B PE=1 SV=1	Protein kinase, ATP binding site-containing protein [Cynara cardunculus var. scolymus]
Unigene127154	139.091	0.29132	-7.6189	5.83359e-19	8.40723e-18	down	--	--	Molecular Function: kinase activity (GO:0016301);;	K14498|9e-15|pop:POPTR_931343|SNRK2;EC:2.7.11.1|hypothetical protein; K14498 serine/threonine-protein kinase SRK2 [EC:2.7.11.1]	[T]	Signal transduction mechanisms	--	Serine/threonine-protein kinase SRK2B OS=Arabidopsis thaliana OX=3702 GN=SRK2B PE=1 SV=1	serine/threonine-protein kinase SRK2A-like [Lactuca sativa]
Unigene121414	45.9359	0	-6.87514	2.8126e-11	2.17132e-10	down	--	--	Molecular Function: protein serine/threonine kinase activity (GO:0004674);; Molecular Function: ATP binding (GO:0005524);; Biological Process: protein phosphorylation (GO:0006468);;	K14498|2e-18|rcu:RCOM_0602280|SNRK2;EC:2.7.11.1|Serine/threonine-protein kinase SAPK10, putative (EC:2.7.11.1); K14498 serine/threonine-protein kinase SRK2 [EC:2.7.11.1]	[T]	Signal transduction mechanisms	--	Serine/threonine-protein kinase SRK2D OS=Arabidopsis thaliana OX=3702 GN=SRK2D PE=1 SV=1	serine/threonine-protein kinase SRK2I-like [Helianthus annuus]
Unigene165091	81.3211	206.964	1.34405	7.18533e-17	9.00054e-16	up	--	--	Molecular Function: protein kinase activity (GO:0004672);; Molecular Function: ATP binding (GO:0005524);; Biological Process: protein phosphorylation (GO:0006468);;	K14498|3e-18|rcu:RCOM_0774030|SNRK2;EC:2.7.11.1|Serine/threonine-protein kinase SAPK10, putative (EC:2.7.11.1); K14498 serine/threonine-protein kinase SRK2 [EC:2.7.11.1]	[T]	Signal transduction mechanisms	--	Serine/threonine-protein kinase SRK2E OS=Arabidopsis thaliana OX=3702 GN=SRK2E PE=1 SV=1	Protein kinase, ATP binding site-containing protein [Cynara cardunculus var. scolymus]
Unigene187494	42.3758	0.305389	-6.02691	6.61917e-11	4.90877e-10	down	--	--	Molecular Function: ATP binding (GO:0005524);; Cellular Component: nucleus (GO:0005634);; Cellular Component: cytosol (GO:0005829);; Biological Process: sucrose metabolic process (GO:0005985);; Biological Process: protein phosphorylation (GO:0006468);; Biological Process: unsaturated fatty acid biosynthetic process (GO:0006636);; Biological Process: response to water deprivation (GO:0009414);; Bi…	K14498|5e-17|ath:AT4G33950|SNRK2;EC:2.7.11.1|OST1; OST1 (OPEN STOMATA 1); calcium-dependent protein serine/threonine kinase/ kinase/ protein kinase; K14498 serine/threonine-protein kinase SRK2 [EC:2.7.11.1]	[T]	Signal transduction mechanisms	--	Serine/threonine-protein kinase SRK2E OS=Arabidopsis thaliana OX=3702 GN=SRK2E PE=1 SV=1	hypothetical protein LSAT_7X87581 [Lactuca sativa]
Unigene086810	1.49445	12.5975	2.79716	0.000680996	0.00181593	up	[RTKL]	--	Molecular Function: protein serine/threonine kinase activity (GO:0004674);; Molecular Function: ATP binding (GO:0005524);; Biological Process: protein phosphorylation (GO:0006468);; Biological Process: iron ion transport (GO:0006826);; Biological Process: response to osmotic stress (GO:0006970);; Biological Process: cellular response to iron ion starvation (GO:0010106);; Biological Process: respo…	K14498|3e-68|pop:POPTR_665248|SNRK2;EC:2.7.11.1|hypothetical protein; K14498 serine/threonine-protein kinase SRK2 [EC:2.7.11.1]	[T]	Signal transduction mechanisms	Protein kinase domain;; Protein tyrosine kinase	Serine/threonine-protein kinase SRK2G OS=Arabidopsis thaliana OX=3702 GN=SRK2G PE=1 SV=2	serine/threonine-protein kinase SAPK7-like [Lactuca sativa]
Unigene048063	3.99967	33.764	2.95417	3.65075e-08	1.94008e-07	up	--	--	--	--	[TA]	--	--	Serine/threonine-protein kinase SRK2H OS=Arabidopsis thaliana OX=3702 GN=SRK2H PE=1 SV=1	putative leucine-rich repeat domain, L domain-like protein [Helianthus annuus]
ABF	ABSCISIC ACID-INSENSITIVE 5-like protein
Unigene033430	16.156	45.5139	1.4728	3.06546e-05	0.000104824	up	--	--	Molecular Function: DNA-binding transcription factor activity (GO:0003700);; Molecular Function: protein binding (GO:0005515);; Cellular Component: nucleus (GO:0005634);; Biological Process: response to water deprivation (GO:0009414);; Biological Process: response to salt stress (GO:0009651);; Biological Process: abscisic acid-activated signaling pathway (GO:0009738);; Biological Process: glucose…	K14432|6e-15|ath:AT1G45249|ABF;ABF|ABF2; ABF2 (ABSCISIC ACID RESPONSIVE ELEMENTS-BINDING FACTOR 2); DNA binding / protein binding / transcription activator/ transcription factor; K14432 ABA responsive element binding factor	--	--	--	ABSCISIC ACID-INSENSITIVE 5-like protein 5 OS=Arabidopsis thaliana OX=3702 GN=ABF2 PE=1 SV=1	putative basic-leucine zipper domain-containing protein [Helianthus annuus]
Unigene138857	16.7452	42.0788	1.30504	0.000252213	0.000732457	up	--	--	--	K14432|1e-33|vvi:100232889|ABF;ABF|GRIP55; ripening-related bZIP protein-like; K14432 ABA responsive element binding factor	--	--	--	ABSCISIC ACID-INSENSITIVE 5-like protein 5 OS=Arabidopsis thaliana OX=3702 GN=ABF2 PE=1 SV=1	bZIP transcription factor 46-like isoform X2 [Helianthus annuus]
Unigene123807	119.651	39.6503	-1.58477	6.15041e-13	5.6124e-12	down	--	--	Molecular Function: DNA-binding transcription factor activity (GO:0003700);; Biological Process: regulation of transcription, DNA-templated (GO:0006355);; Molecular Function: sequence-specific DNA binding (GO:0043565);;	K14432|9e-10|pop:POPTR_677861|ABF;ABF|hypothetical protein; K14432 ABA responsive element binding factor	--	--	--	ABSCISIC ACID-INSENSITIVE 5-like protein 5 OS=Arabidopsis thaliana OX=3702 GN=ABF2 PE=1 SV=1	ABSCISIC ACID-INSENSITIVE 5-like protein 5 isoform X1 [Lactuca sativa]
Unigene129063	1154.02	334.738	-1.78173	4.10548e-94	6.1453e-92	down	--	--	--	K14432|6e-53|vvi:100232889|ABF;ABF|GRIP55; ripening-related bZIP protein-like; K14432 ABA responsive element binding factor	--	--	--	ABSCISIC ACID-INSENSITIVE 5-like protein 5 OS=Arabidopsis thaliana OX=3702 GN=ABF2 PE=1 SV=1	Basic-leucine zipper domain-containing protein [Cynara cardunculus var. scolymus]
Unigene127551	9.4455	0.305389	-3.9074	0.000362453	0.00102129	down	--	--	--	K14432|3e-21|ath:AT1G45249|ABF;ABF|ABF2; ABF2 (ABSCISIC ACID RESPONSIVE ELEMENTS-BINDING FACTOR 2); DNA binding / protein binding / transcription activator/ transcription factor; K14432 ABA responsive element binding factor	--	--	--	ABSCISIC ACID-INSENSITIVE 5-like protein 5 OS=Arabidopsis thaliana OX=3702 GN=ABF2 PE=1 SV=1	putative basic-leucine zipper domain-containing protein [Helianthus annuus]
Unigene080280	21.2079	121.631	2.49818	3.68015e-22	6.4027e-21	up	--	--	--	K14432|9e-29|pop:POPTR_677861|ABF;ABF|hypothetical protein; K14432 ABA responsive element binding factor	--	--	--	ABSCISIC ACID-INSENSITIVE 5-like protein 7 OS=Arabidopsis thaliana OX=3702 GN=ABF4 PE=1 SV=1	bZIP transcription factor 46-like isoform X2 [Helianthus annuus]
Unigene086187	73.2155	5.24146	-3.71829	2.84745e-20	4.44278e-19	down	--	--	--	K14432|2e-43|rcu:RCOM_0813280|ABF;ABF|DNA binding protein, putative; K14432 ABA responsive element binding factor	--	--	bZIP transcription factor;; Basic region leucine zipper	ABSCISIC ACID-INSENSITIVE 5-like protein 7 OS=Arabidopsis thaliana OX=3702 GN=ABF4 PE=1 SV=1	ABSCISIC ACID-INSENSITIVE 5-like protein 7 isoform X2 [Lactuca sativa]
Unigene162201	97.208	1.78604	-5.53689	5.78151e-23	1.05096e-21	down	--	--	--	K14432|4e-41|rcu:RCOM_0813280|ABF;ABF|DNA binding protein, putative; K14432 ABA responsive element binding factor	--	--	bZIP transcription factor;; Basic region leucine zipper	ABSCISIC ACID-INSENSITIVE 5-like protein 7 OS=Arabidopsis thaliana OX=3702 GN=ABF4 PE=1 SV=1	ABSCISIC ACID-INSENSITIVE 5-like protein 7 isoform X2 [Lactuca sativa]
JA
LOX	Linoleate 13S-lipoxygenase
Unigene074059	221.6	2424.54	3.44734	0	0	up	--	--	Molecular Function: oxidoreductase activity (GO:0016491);; Biological Process: metabolic process (GO:0044710);;	--	--	--	Lipoxygenase;; PLAT/LH2 domain	Linoleate 13S-lipoxygenase 2-1, chloroplastic OS=Solanum tuberosum OX=4113 GN=LOX2.1 PE=1 SV=1	linoleate 13S-lipoxygenase 2-1, chloroplastic-like [Helianthus annuus]
Unigene049704	822.694	4865.82	2.56311	0	0	up	--	--	Molecular Function: oxidoreductase activity, acting on single donors with incorporation of molecular oxygen, incorporation of two atoms of oxygen (GO:0016702);; Biological Process: oxylipin biosynthetic process (GO:0031408);; Molecular Function: metal ion binding (GO:0046872);; Biological Process: oxidation-reduction process (GO:0055114);;	K00454|0.0|vvi:100257867|LOX2S;EC:1.13.11.12|hypothetical protein LOC100257867	--	--	Lipoxygenase	Linoleate 13S-lipoxygenase 2-1, chloroplastic OS=Solanum tuberosum OX=4113 GN=LOX2.1 PE=1 SV=1	linoleate 13S-lipoxygenase 2-1, chloroplastic-like [Helianthus annuus]
Unigene059480	66.5532	298.583	2.1594	5.06611e-39	1.85567e-37	up	--	--	Molecular Function: oxidoreductase activity, acting on single donors with incorporation of molecular oxygen, incorporation of two atoms of oxygen (GO:0016702);; Biological Process: oxylipin biosynthetic process (GO:0031408);; Molecular Function: metal ion binding (GO:0046872);; Biological Process: oxidation-reduction process (GO:0055114);;	--	--	--	Lipoxygenase;; PLAT/LH2 domain;; Lipoxygenase	Linoleate 13S-lipoxygenase 2-1, chloroplastic OS=Solanum tuberosum OX=4113 GN=LOX2.1 PE=1 SV=1	linoleate 13S-lipoxygenase 2-1, chloroplastic-like [Helianthus annuus]
Unigene171801	283.424	1127.73	1.98958	1.28874e-135	3.6316e-133	up	--	--	Molecular Function: oxidoreductase activity, acting on single donors with incorporation of molecular oxygen, incorporation of two atoms of oxygen (GO:0016702);; Biological Process: oxylipin biosynthetic process (GO:0031408);; Molecular Function: metal ion binding (GO:0046872);; Biological Process: oxidation-reduction process (GO:0055114);;	--	--	--	Lipoxygenase;; Lipoxygenase	Linoleate 13S-lipoxygenase 2-1, chloroplastic OS=Solanum tuberosum OX=4113 GN=LOX2.1 PE=1 SV=1	linoleate 13S-lipoxygenase 2-1, chloroplastic-like [Helianthus annuus]
Unigene096547	2.55905	9.40934	1.72086	0.026963	0.0491955	up	--	--	Molecular Function: oxidoreductase activity, acting on single donors with incorporation of molecular oxygen, incorporation of two atoms of oxygen (GO:0016702);; Biological Process: oxylipin biosynthetic process (GO:0031408);; Molecular Function: metal ion binding (GO:0046872);; Biological Process: oxidation-reduction process (GO:0055114);;	K00454|1e-35|osa:4331824|LOX2S;EC:1.13.11.12|Os03g0179900; K00454 lipoxygenase [EC:1.13.11.12]	--	--	Lipoxygenase	Linoleate 13S-lipoxygenase 3-1, chloroplastic OS=Solanum tuberosum OX=4113 GN=LOX3.1 PE=1 SV=1	linoleate 13S-lipoxygenase 3-1, chloroplastic [Lactuca sativa]
Unigene198366	46.1885	129.305	1.47964	7.13683e-13	6.47243e-12	up	--	--	Molecular Function: oxidoreductase activity, acting on single donors with incorporation of molecular oxygen, incorporation of two atoms of oxygen (GO:0016702);; Biological Process: oxylipin biosynthetic process (GO:0031408);; Molecular Function: metal ion binding (GO:0046872);; Biological Process: oxidation-reduction process (GO:0055114);;	K00454|1e-160|vvi:100257867|LOX2S;EC:1.13.11.12|hypothetical protein LOC100257867	--	--	Lipoxygenase	Linoleate 13S-lipoxygenase 2-1, chloroplastic OS=Solanum tuberosum OX=4113 GN=LOX2.1 PE=1 SV=1	linoleate 13S-lipoxygenase 2-1, chloroplastic-like [Helianthus annuus]
Unigene040963	83.9947	227.178	1.43364	2.15125e-20	3.37991e-19	up	--	--	Cellular Component: chloroplast thylakoid (GO:0009534);; Cellular Component: chloroplast stroma (GO:0009570);; Molecular Function: linoleate 13S-lipoxygenase activity (GO:0016165);; Biological Process: oxylipin biosynthetic process (GO:0031408);; Molecular Function: metal ion binding (GO:0046872);; Biological Process: oxidation-reduction process (GO:0055114);;	--	--	--	Lipoxygenase	Linoleate 13S-lipoxygenase 3-1, chloroplastic OS=Solanum tuberosum OX=4113 GN=LOX3.1 PE=1 SV=1	linoleate 13S-lipoxygenase 3-1, chloroplastic-like [Lactuca sativa]
Unigene176289	23.6449	58.2811	1.29204	5.30629e-05	0.000173889	up	--	--	--	--	--	--	--	Linoleate 13S-lipoxygenase 2-1, chloroplastic OS=Solanum tuberosum OX=4113 GN=LOX2.1 PE=1 SV=1	Lipase/lipooxygenase, PLAT/LH2 [Cynara cardunculus var. scolymus]
Unigene131601	192.158	75.7397	-1.33873	1.03558e-16	1.28272e-15	down	--	--	Cellular Component: chloroplast thylakoid (GO:0009534);; Cellular Component: chloroplast stroma (GO:0009570);; Molecular Function: linoleate 13S-lipoxygenase activity (GO:0016165);; Biological Process: oxylipin biosynthetic process (GO:0031408);; Molecular Function: metal ion binding (GO:0046872);; Biological Process: oxidation-reduction process (GO:0055114);;	--	--	--	Lipoxygenase	Linoleate 13S-lipoxygenase 3-1, chloroplastic OS=Solanum tuberosum OX=4113 GN=LOX3.1 PE=1 SV=1	lipoxygenase 1 [Tanacetum cinerariifolium]
Unigene089562	220.082	78.853	-1.47488	6.72348e-22	1.15077e-20	down	--	--	Molecular Function: oxidoreductase activity, acting on single donors with incorporation of molecular oxygen, incorporation of two atoms of oxygen (GO:0016702);; Biological Process: oxylipin biosynthetic process (GO:0031408);; Molecular Function: metal ion binding (GO:0046872);; Biological Process: oxidation-reduction process (GO:0055114);;	--	--	--	Lipoxygenase	Linoleate 13S-lipoxygenase 3-1, chloroplastic OS=Solanum tuberosum OX=4113 GN=LOX3.1 PE=1 SV=1	lipoxygenase 1 [Tanacetum cinerariifolium]
Unigene171760	28.5711	4.13156	-2.69923	2.0584e-07	9.87689e-07	down	--	--	--	--	--	--	--	Linoleate 13S-lipoxygenase 2-1, chloroplastic OS=Solanum tuberosum OX=4113 GN=LOX2.1 PE=1 SV=1	linoleate 13S-lipoxygenase 2-1, chloroplastic-like [Helianthus annuus]
Unigene109361	1243.68	182.393	-2.76606	4.06632e-216	2.60783e-213	down	--	--	Molecular Function: oxidoreductase activity, acting on single donors with incorporation of molecular oxygen, incorporation of two atoms of oxygen (GO:0016702);; Biological Process: oxylipin biosynthetic process (GO:0031408);; Molecular Function: metal ion binding (GO:0046872);; Biological Process: oxidation-reduction process (GO:0055114);;	--	--	--	Lipoxygenase;; Lipoxygenase	Linoleate 13S-lipoxygenase 2-1, chloroplastic OS=Solanum tuberosum OX=4113 GN=LOX2.1 PE=1 SV=1	lipoxygenase 2 [Tanacetum cinerariifolium]
Unigene112669	45.3315	3.53894	-3.56628	1.18213e-12	1.04944e-11	down	--	--	Molecular Function: oxidoreductase activity, acting on single donors with incorporation of molecular oxygen, incorporation of two atoms of oxygen (GO:0016702);; Molecular Function: metal ion binding (GO:0046872);; Biological Process: oxidation-reduction process (GO:0055114);;	--	--	--	Lipoxygenase	Linoleate 13S-lipoxygenase 2-1, chloroplastic OS=Solanum tuberosum OX=4113 GN=LOX2.1 PE=1 SV=1	Lipase/lipooxygenase, PLAT/LH2 [Cynara cardunculus var. scolymus]
Unigene040172	62.9489	3.58524	-4.0387	8.07411e-18	1.07858e-16	down	--	--	Molecular Function: oxidoreductase activity, acting on single donors with incorporation of molecular oxygen, incorporation of two atoms of oxygen (GO:0016702);; Biological Process: oxylipin biosynthetic process (GO:0031408);; Molecular Function: metal ion binding (GO:0046872);; Biological Process: oxidation-reduction process (GO:0055114);;	K00454|1e-155|vvi:100257867|LOX2S;EC:1.13.11.12|hypothetical protein LOC100257867	--	--	Lipoxygenase	Linoleate 13S-lipoxygenase 2-1, chloroplastic OS=Solanum tuberosum OX=4113 GN=LOX2.1 PE=1 SV=1	linoleate 13S-lipoxygenase 2-1, chloroplastic-like [Lactuca sativa]
Unigene106148	69.7174	2.05331	-4.87157	2.44366e-18	3.38093e-17	down	--	--	Molecular Function: oxidoreductase activity, acting on single donors with incorporation of molecular oxygen, incorporation of two atoms of oxygen (GO:0016702);; Biological Process: oxylipin biosynthetic process (GO:0031408);; Molecular Function: metal ion binding (GO:0046872);; Biological Process: oxidation-reduction process (GO:0055114);;	K00454|0.0|vvi:100257867|LOX2S;EC:1.13.11.12|hypothetical protein LOC100257867	--	--	Lipoxygenase	Linoleate 13S-lipoxygenase 2-1, chloroplastic OS=Solanum tuberosum OX=4113 GN=LOX2.1 PE=1 SV=1	linoleate 13S-lipoxygenase 2-1, chloroplastic-like [Lactuca sativa]
Unigene152834	120.397	0	-8.107	1.28006e-15	1.46651e-14	down	--	--	Molecular Function: oxidoreductase activity, acting on single donors with incorporation of molecular oxygen, incorporation of two atoms of oxygen (GO:0016702);; Biological Process: oxylipin biosynthetic process (GO:0031408);; Molecular Function: metal ion binding (GO:0046872);; Biological Process: oxidation-reduction process (GO:0055114);;	--	--	--	Lipoxygenase	Linoleate 13S-lipoxygenase 2-1, chloroplastic OS=Solanum tuberosum OX=4113 GN=LOX2.1 PE=1 SV=1	LoxC-like, partial [Solanum pimpinellifolium]
Unigene155985	131.16	0	-8.21655	4.4064e-16	5.21654e-15	down	--	--	Molecular Function: oxidoreductase activity, acting on single donors with incorporation of molecular oxygen, incorporation of two atoms of oxygen (GO:0016702);; Biological Process: oxylipin biosynthetic process (GO:0031408);; Molecular Function: metal ion binding (GO:0046872);; Biological Process: oxidation-reduction process (GO:0055114);;	--	--	--	Lipoxygenase;; Lipoxygenase;; Lipoxygenase	Linoleate 13S-lipoxygenase 2-1, chloroplastic OS=Solanum tuberosum OX=4113 GN=LOX2.1 PE=1 SV=1	Lipase/lipooxygenase, PLAT/LH2, partial [Cynara cardunculus var. scolymus]
AOC	Allene oxide cyclase
Unigene174172	87.6148	252.008	1.51852	2.03606e-24	3.99921e-23	up	--	--	Biological Process: metabolic process (GO:0008152);; Cellular Component: chloroplast (GO:0009507);; Molecular Function: allene-oxide cyclase activity (GO:0046423);;	--	--	--	Allene oxide cyclase	Allene oxide cyclase, chloroplastic OS=Oryza sativa subsp. japonica OX=39947 GN=AOC PE=1 SV=1	hypothetical protein Ccrd_026493 [Cynara cardunculus var. scolymus]
Unigene124237	294.026	104.717	-1.48618	3.77437e-28	8.85768e-27	down	--	--	Biological Process: metabolic process (GO:0008152);; Cellular Component: chloroplast (GO:0009507);; Molecular Function: isomerase activity (GO:0016853);;	--	--	--	Allene oxide cyclase	Allene oxide cyclase, chloroplastic OS=Oryza sativa subsp. japonica OX=39947 GN=AOC PE=1 SV=1	hypothetical protein LSAT_4X153121 [Lactuca sativa]
Unigene052031	326.592	76.3346	-2.09061	9.52084e-49	4.83969e-47	down	--	--	Biological Process: metabolic process (GO:0008152);; Cellular Component: chloroplast (GO:0009507);; Molecular Function: isomerase activity (GO:0016853);;	--	--	--	Allene oxide cyclase	Allene oxide cyclase, chloroplastic OS=Oryza sativa subsp. japonica OX=39947 GN=AOC PE=1 SV=1	allene oxide cyclase, chloroplastic-like [Helianthus annuus]
OPR	12-oxophytodienoate reductase
Unigene038530	23.0411	5.88946	-1.90923	0.000143632	0.000436553	down	--	--	Molecular Function: FMN binding (GO:0010181);; Molecular Function: oxidoreductase activity (GO:0016491);; Biological Process: oxidation-reduction process (GO:0055114);;	K05894|2e-14|vvi:100255087|OPR;EC:1.3.1.42|hypothetical protein LOC100255087	[CR]	--	--	12-oxophytodienoate reductase 1 OS=Solanum lycopersicum OX=4081 GN=OPR1 PE=1 SV=1	PREDICTED: 12-oxophytodienoate reductase 2-like [Malus domestica]
Unigene030459	55.071	24.8538	-1.13129	0.000301307	0.000862249	down	[C]	Energy production and conversion	Molecular Function: FMN binding (GO:0010181);; Molecular Function: oxidoreductase activity (GO:0016491);; Biological Process: oxidation-reduction process (GO:0055114);;	K05894|1e-145|vvi:100256548|OPR;EC:1.3.1.42|hypothetical protein LOC100256548	[CR]	--	NADH:flavin oxidoreductase / NADH oxidase family	12-oxophytodienoate reductase 1 OS=Arabidopsis thaliana OX=3702 GN=OPR1 PE=1 SV=2	putative 12-oxophytodienoate reductase 11 [Helianthus annuus]
Unigene156930	8.3947	0.846717	-2.80161	0.00413301	0.00930638	down	[C]	Energy production and conversion	--	K05894|1e-71|osa:4340490|OPR;EC:1.3.1.42|Os06g0216300	[CR]	--	NADH:flavin oxidoreductase / NADH oxidase family	12-oxophytodienoate reductase 1 OS=Oryza sativa subsp. japonica OX=39947 GN=OPR1 PE=2 SV=1	12-oxophytodienoate reductase [Achlya hypogyna]
Unigene201143	133.873	51.5951	-1.3643	1.28737e-11	1.03197e-10	down	[C]	Energy production and conversion	Molecular Function: FMN binding (GO:0010181);; Molecular Function: oxidoreductase activity (GO:0016491);; Biological Process: oxidation-reduction process (GO:0055114);;	K05894|0.0|vvi:100244746|OPR;EC:1.3.1.42|hypothetical protein LOC100244746	[CR]	--	NADH:flavin oxidoreductase / NADH oxidase family	12-oxophytodienoate reductase 1 OS=Solanum lycopersicum OX=4081 GN=OPR1 PE=1 SV=1	12-oxophytodienoate reductase 2-like [Helianthus annuus]
Unigene161752	99.9547	24.2216	-2.02609	2.63171e-16	3.16851e-15	down	[C]	Energy production and conversion	Molecular Function: FMN binding (GO:0010181);; Molecular Function: oxidoreductase activity (GO:0016491);; Biological Process: oxidation-reduction process (GO:0055114);;	--	[CR]	--	NADH:flavin oxidoreductase / NADH oxidase family;; NADH:flavin oxidoreductase / NADH oxidase family	12-oxophytodienoate reductase 1 OS=Solanum lycopersicum OX=4081 GN=OPR1 PE=1 SV=1	putative 12-oxophytodienoate reductase 11 [Lactuca sativa]
Unigene141736	30.7624	1.81827	-3.88993	1.1958e-09	7.65935e-09	down	[C]	Energy production and conversion	--	--	[CR]	--	NADH:flavin oxidoreductase / NADH oxidase family;; NADH:flavin oxidoreductase / NADH oxidase family	12-oxophytodienoate reductase 1 OS=Solanum lycopersicum OX=4081 GN=OPR1 PE=1 SV=1	putative 12-oxophytodienoate reductase 11 [Lactuca sativa]
Unigene115385	309.383	19.5224	-3.95711	2.60904e-69	2.32868e-67	down	[C]	Energy production and conversion	Molecular Function: FMN binding (GO:0010181);; Molecular Function: oxidoreductase activity (GO:0016491);; Biological Process: oxidation-reduction process (GO:0055114);;	K05894|1e-111|vvi:100256548|OPR;EC:1.3.1.42|hypothetical protein LOC100256548	[CR]	--	NADH:flavin oxidoreductase / NADH oxidase family	12-oxophytodienoate reductase 1 OS=Solanum lycopersicum OX=4081 GN=OPR1 PE=1 SV=1	putative 12-oxophytodienoate reductase 11 [Helianthus annuus]
Unigene130906	49.5747	0.596709	-5.73952	7.60631e-13	6.88185e-12	down	[C]	Energy production and conversion	Molecular Function: FMN binding (GO:0010181);; Molecular Function: oxidoreductase activity (GO:0016491);; Biological Process: oxidation-reduction process (GO:0055114);;	--	[CR]	--	--	12-oxophytodienoate reductase 1 OS=Solanum lycopersicum OX=4081 GN=OPR1 PE=1 SV=1	12-oxophytodienoate reductase 2-like [Prunus avium]
Unigene086046	184.314	87.5461	-1.06458	7.50741e-09	4.36084e-08	down	[C]	Energy production and conversion	Molecular Function: catalytic activity (GO:0003824);;	--	[CR]	--	NADH:flavin oxidoreductase / NADH oxidase family;; NADH:flavin oxidoreductase / NADH oxidase family;; NADH:flavin oxidoreductase / NADH oxidase family	12-oxophytodienoate reductase 2 OS=Arabidopsis thaliana OX=3702 GN=OPR2 PE=1 SV=2	putative 12-oxophytodienoate reductase 11 [Lactuca sativa]
Unigene153424	4.38812	0	-3.41252	0.00828476	0.0173888	down	[C]	Energy production and conversion	Molecular Function: FMN binding (GO:0010181);; Molecular Function: oxidoreductase activity (GO:0016491);; Molecular Function: flavin adenine dinucleotide binding (GO:0050660);; Biological Process: oxidation-reduction process (GO:0055114);;	--	[CR]	--	NADH:flavin oxidoreductase / NADH oxidase family	12-oxophytodienoate reductase 2 OS=Arabidopsis thaliana OX=3702 GN=OPR2 PE=1 SV=2	uncharacterized protein LOC109794476, partial [Cajanus cajan]
Unigene006539	25.9803	11.2467	-1.18646	0.00621289	0.0134311	down	--	--	--	--	--	--	--	Putative 12-oxophytodienoate reductase 2 OS=Oryza sativa subsp. japonica OX=39947 GN=OPR2 PE=3 SV=1	--
Unigene157992	10.2031	0.869868	-3.08005	0.000960485	0.00248596	down	[C]	Energy production and conversion	--	--	[CR]	--	NADH:flavin oxidoreductase / NADH oxidase family	Putative 12-oxophytodienoate reductase 3 OS=Oryza sativa subsp. japonica OX=39947 GN=OPR3 PE=3 SV=1	hypothetical protein CHLRE_01g050150v5 [Chlamydomonas reinhardtii]
Unigene115839	6.82296	0.564478	-2.79341	0.0142556	0.0281533	down	[C]	Energy production and conversion	Molecular Function: NADPH dehydrogenase activity (GO:0003959);; Molecular Function: FMN binding (GO:0010181);; Molecular Function: pentaerythritol trinitrate reductase activity (GO:0018548);; Molecular Function: trichloro-p-hydroquinone reductive dehalogenase activity (GO:0052690);; Biological Process: oxidation-reduction process (GO:0055114);;	--	[CR]	--	NADH:flavin oxidoreductase / NADH oxidase family;; Helix-turn-helix domain;; Bacterial regulatory protein, arsR family	12-oxophytodienoate reductase 3 OS=Arabidopsis thaliana OX=3702 GN=OPR3 PE=1 SV=2	2,4-dienoyl-CoA reductase [NADPH], putative [Ricinus communis]
Unigene193362	9.37649	1.52695	-2.31555	0.01334	0.0265822	down	[C]	Energy production and conversion	--	--	[CR]	--	NADH:flavin oxidoreductase / NADH oxidase family;; Pyridine nucleotide-disulphide oxidoreductase;; NAD(P)-binding Rossmann-like domain;; FAD dependent oxidoreductase;; Pyridine nucleotide-disulphide oxidoreductase;; HI0933-like protein	Putative 12-oxophytodienoate reductase 11 OS=Oryza sativa subsp. japonica OX=39947 GN=OPR11 PE=2 SV=1	-dienoyl-reductase [Plasmopara halstedii]
Unigene103060	3048.87	0	-12.2164	1.96094e-44	8.63713e-43	down	[C]	Energy production and conversion	Molecular Function: FMN binding (GO:0010181);; Molecular Function: oxidoreductase activity (GO:0016491);; Biological Process: oxidation-reduction process (GO:0055114);;	--	[CR]	--	NADH:flavin oxidoreductase / NADH oxidase family	Putative 12-oxophytodienoate reductase 11 OS=Oryza sativa subsp. japonica OX=39947 GN=OPR11 PE=2 SV=1	Aldolase-type TIM barrel [Cynara cardunculus var. scolymus]
Unigene132365	7.90412	0.305389	-3.53146	0.00255814	0.00604356	down	[C]	Energy production and conversion	--	--	[CR]	--	NADH:flavin oxidoreductase / NADH oxidase family;; LysE type translocator	Putative 12-oxophytodienoate reductase 12 OS=Oryza sativa subsp. japonica OX=39947 GN=OPR12 PE=2 SV=2	unnamed protein product, partial [Tuber aestivum]
JAR
Unigene048370	2.86745	19.2824	2.56664	0.000119223	0.00036782	up	--	--	Cellular Component: exocyst (GO:0000145);; Biological Process: exocytosis (GO:0006887);;	K07195|1e-13|vvi:100261660|EXOC7, EXO70;EXOC7, EXO70|hypothetical protein LOC100261660; K07195 exocyst complex component 7	[A]	RNA processing and modification	Exo70 exocyst complex subunit	Jasmonic acid-amido synthetase JAR1 OS=Oryza sativa subsp. japonica OX=39947 GN=GH3.5 PE=2 SV=1	Cullin repeat-like-containing domain-containing protein [Cynara cardunculus var. scolymus]
Unigene034819	0.716173	6.18986	2.49804	0.0215934	0.0405745	up	--	--	--	--	--	--	--	Jasmonic acid-amido synthetase JAR1 OS=Oryza sativa subsp. japonica OX=39947 GN=GH3.5 PE=2 SV=1	jasmonic acid-amido synthetase JAR1-like [Lactuca sativa]
Unigene056528	42.4185	100.051	1.23065	2.48774e-08	1.35138e-07	up	--	--	--	K14506|0.0|vvi:100251627|JAR1;JAR1|hypothetical protein LOC100251627; K14506 jasmonic acid-amino synthetase	--	--	GH3 auxin-responsive promoter	Jasmonic acid-amido synthetase JAR1 OS=Oryza sativa subsp. japonica OX=39947 GN=GH3.5 PE=2 SV=1	putative GH3 family [Helianthus annuus]
COI1
Unigene020469	68.247	160.49	1.2275	1.66524e-11	1.31798e-10	up	--	--	Biological Process: response to molecule of bacterial origin (GO:0002237);; Biological Process: response to insect (GO:0009625);; Biological Process: shade avoidance (GO:0009641);; Biological Process: jasmonic acid and ethylene-dependent systemic resistance (GO:0009861);; Biological Process: jasmonic acid mediated signaling pathway (GO:0009867);; Biological Process: regulation of flower developme…	K13463|0.0|vvi:100254771|COI-1;COI-1|hypothetical protein LOC100254771; K13463 coronatine-insensitive protein 1	[R]	General function prediction only	--	Coronatine-insensitive protein 1 OS=Arabidopsis thaliana OX=3702 GN=COI1 PE=1 SV=1	hypothetical protein Ccrd_014620 [Cynara cardunculus var. scolymus]
Unigene051736	75.3695	211.579	1.48507	4.58024e-21	7.48796e-20	up	--	--	Biological Process: response to molecule of bacterial origin (GO:0002237);; Biological Process: response to insect (GO:0009625);; Biological Process: shade avoidance (GO:0009641);; Biological Process: jasmonic acid and ethylene-dependent systemic resistance (GO:0009861);; Biological Process: jasmonic acid mediated signaling pathway (GO:0009867);; Biological Process: regulation of flower developme…	K13463|9e-65|vvi:100254771|COI-1;COI-1|hypothetical protein LOC100254771; K13463 coronatine-insensitive protein 1	[R]	General function prediction only	--	Coronatine-insensitive protein 1 OS=Arabidopsis thaliana OX=3702 GN=COI1 PE=1 SV=1	hypothetical protein Ccrd_011696 [Cynara cardunculus var. scolymus]
Unigene086732	0	6.08728	3.73147	0.00228125	0.0054492	up	--	--	--	K13463|5e-25|vvi:100254771|COI-1;COI-1|hypothetical protein LOC100254771; K13463 coronatine-insensitive protein 1	[R]	General function prediction only	--	Coronatine-insensitive protein 1 OS=Arabidopsis thaliana OX=3702 GN=COI1 PE=1 SV=1	putative leucine-rich repeat domain, L domain-like protein [Helianthus annuus]
Unigene129477	83.3868	196.117	1.23011	4.62553e-15	5.05969e-14	up	--	--	Biological Process: response to molecule of bacterial origin (GO:0002237);; Biological Process: response to insect (GO:0009625);; Biological Process: shade avoidance (GO:0009641);; Biological Process: jasmonic acid and ethylene-dependent systemic resistance (GO:0009861);; Biological Process: jasmonic acid mediated signaling pathway (GO:0009867);; Biological Process: regulation of flower developme…	K13463|4e-74|vvi:100254771|COI-1;COI-1|hypothetical protein LOC100254771; K13463 coronatine-insensitive protein 1	[R]	General function prediction only	--	Coronatine-insensitive protein 1 OS=Arabidopsis thaliana OX=3702 GN=COI1 PE=1 SV=1	hypothetical protein Ccrd_014620 [Cynara cardunculus var. scolymus]
Unigene195512	86.5869	174.336	1.00914	7.56715e-10	4.9682e-09	up	--	--	Biological Process: response to molecule of bacterial origin (GO:0002237);; Biological Process: response to insect (GO:0009625);; Biological Process: shade avoidance (GO:0009641);; Biological Process: jasmonic acid and ethylene-dependent systemic resistance (GO:0009861);; Biological Process: jasmonic acid mediated signaling pathway (GO:0009867);; Biological Process: regulation of flower developme…	K13463|4e-65|vvi:100254771|COI-1;COI-1|hypothetical protein LOC100254771; K13463 coronatine-insensitive protein 1	[R]	General function prediction only	--	Coronatine-insensitive protein 1 OS=Arabidopsis thaliana OX=3702 GN=COI1 PE=1 SV=1	hypothetical protein Ccrd_011696 [Cynara cardunculus var. scolymus]
Unigene204583	9.26683	66.5228	2.8051	1.51929e-13	1.46557e-12	up	--	--	--	K13463|8e-73|vvi:100254771|COI-1;COI-1|hypothetical protein LOC100254771; K13463 coronatine-insensitive protein 1	[R]	General function prediction only	--	Coronatine-insensitive protein 1 OS=Arabidopsis thaliana OX=3702 GN=COI1 PE=1 SV=1	coronatine-insensitive protein 1-like [Lactuca sativa]
Unigene148152	23.0342	11.0755	-1.02812	0.0184165	0.0353492	down	--	--	Biological Process: response to molecule of bacterial origin (GO:0002237);; Biological Process: response to insect (GO:0009625);; Biological Process: shade avoidance (GO:0009641);; Biological Process: jasmonic acid and ethylene-dependent systemic resistance (GO:0009861);; Biological Process: jasmonic acid mediated signaling pathway (GO:0009867);; Biological Process: regulation of flower developme…	K13463|1e-175|vvi:100254771|COI-1;COI-1|hypothetical protein LOC100254771; K13463 coronatine-insensitive protein 1	[R]	General function prediction only	--	Coronatine-insensitive protein 1 OS=Arabidopsis thaliana OX=3702 GN=COI1 PE=1 SV=1	coronatine-insensitive protein 1-like [Helianthus annuus]
JAZ
Unigene055024	3.64849	22.1367	2.47431	3.16312e-05	0.000107898	up	--	--	Biological Process: response to hormone (GO:0009725);; Biological Process: cellular process (GO:0044763);; Biological Process: regulation of cellular process (GO:0050794);;	K13464|6e-10|vvi:100262641|JAZ;JAZ|hypothetical protein LOC100262641; K13464 jasmonate ZIM domain-containing protein	--	--	Divergent CCT motif;; tify domain	--	protein TIFY 9-like [Helianthus annuus]
Unigene004186	3519.16	1559.76	-1.17319	1.2207e-131	3.24329e-129	down	--	--	--	K13464|2e-17|vvi:100262965|JAZ;JAZ|hypothetical protein LOC100262965; K13464 jasmonate ZIM domain-containing protein	--	--	--	--	ZIM-domain protein 8 [Artemisia annua]
Unigene141248	984.79	451.01	-1.12623	4.82149e-53	2.77945e-51	down	--	--	--	K13464|1e-23|vvi:100262965|JAZ;JAZ|hypothetical protein LOC100262965; K13464 jasmonate ZIM domain-containing protein	--	--	Divergent CCT motif	Protein TIFY 6a OS=Oryza sativa subsp. indica OX=39946 GN=TIFY6A PE=3 SV=1	protein TIFY 6B-like isoform X2 [Lactuca sativa]
Unigene187730	1369.04	39.4506	-5.11157	2.85586e-289	3.31965e-286	down	--	--	--	K13464|3e-07|pop:POPTR_656962|JAZ;JAZ|hypothetical protein; K13464 jasmonate ZIM domain-containing protein	--	--	Divergent CCT motif	Protein TIFY 6b OS=Oryza sativa subsp. japonica OX=39947 GN=TIFY6B PE=1 SV=1	protein TIFY 6A-like [Helianthus annuus]
Unigene014235	269.296	115.855	-1.2124	8.5807e-16	9.94854e-15	down	--	--	Biological Process: response to hormone (GO:0009725);; Biological Process: cellular process (GO:0044763);; Biological Process: regulation of cellular process (GO:0050794);;	K13464|7e-34|pop:POPTR_548076|JAZ;JAZ|hypothetical protein; K13464 jasmonate ZIM domain-containing protein	--	--	tify domain;; Divergent CCT motif	Protein TIFY 9 OS=Arabidopsis thaliana OX=3702 GN=TIFY9 PE=1 SV=1	jasmonate ZIM-domain protein 5 [Artemisia annua]
Unigene143374	10.2403	2.34553	-1.96734	0.00830242	0.017423	down	--	--	Biological Process: response to acid chemical (GO:0001101);; Biological Process: signal transduction (GO:0007165);; Biological Process: response to hormone (GO:0009725);; Biological Process: response to oxygen-containing compound (GO:1901700);;	K13464|3e-12|pop:POPTR_548076|JAZ;JAZ|hypothetical protein; K13464 jasmonate ZIM domain-containing protein	--	--	Divergent CCT motif;; tify domain	Protein TIFY 9 OS=Arabidopsis thaliana OX=3702 GN=TIFY9 PE=1 SV=1	protein TIFY 9-like [Helianthus annuus]
Unigene147847	48.2459	13.8454	-1.78011	1.95253e-07	9.40317e-07	down	--	--	--	K13464|1e-16|rcu:RCOM_0710780|JAZ;JAZ|hypothetical protein; K13464 jasmonate ZIM domain-containing protein	--	--	tify domain;; Divergent CCT motif	Protein TIFY 10b OS=Oryza sativa subsp. japonica OX=39947 GN=TIFY10B PE=1 SV=1	protein TIFY 10A-like [Lactuca sativa]
Unigene161371	230.652	86.4136	-1.41068	4.67111e-21	7.63234e-20	down	--	--	--	K13464|2e-14|rcu:RCOM_0684970|JAZ;JAZ|hypothetical protein; K13464 jasmonate ZIM domain-containing protein	--	--	tify domain	Protein TIFY 11B OS=Arabidopsis thaliana OX=3702 GN=TIFY11B PE=1 SV=1	ZIM-domain protein 6 [Artemisia annua]
MYC	Transcription factor MYC2
Unigene175970	755.963	2100.83	1.47402	8.05177e-137	2.29063e-134	up	--	--	--	K13422|0.0|vvi:100250607|MYC2;MYC2|similar to MYC transcription factor; K13422 transcription factor MYC2	--	--	bHLH-MYC and R2R3-MYB transcription factors N-terminal;; Helix-loop-helix DNA-binding domain	Transcription factor MYC2 OS=Arabidopsis thaliana OX=3702 GN=MYC2 PE=1 SV=2	transcription factor MYC2 [Cichorium intybus]
Unigene187986	1188.98	3201.73	1.42878	1.96019e-173	8.26206e-171	up	--	--	--	K13422|0.0|vvi:100250607|MYC2;MYC2|similar to MYC transcription factor; K13422 transcription factor MYC2	--	--	bHLH-MYC and R2R3-MYB transcription factors N-terminal;; Helix-loop-helix DNA-binding domain	Transcription factor MYC2 OS=Arabidopsis thaliana OX=3702 GN=MYC2 PE=1 SV=2	Myc-type, basic helix-loop-helix (bHLH) domain-containing protein [Cynara cardunculus var. scolymus]
Unigene069956	176.566	86.3533	-1.02876	3.32271e-10	2.27268e-09	down	--	--	--	--	--	--	Helix-loop-helix DNA-binding domain	Transcription factor MYC2 OS=Arabidopsis thaliana OX=3702 GN=MYC2 PE=1 SV=2	transcription factor MYC2-like [Helianthus annuus]
Unigene155890	36.9313	7.60604	-2.22708	1.50128e-07	7.34218e-07	down	--	--	Molecular Function: protein dimerization activity (GO:0046983);;	--	--	--	--	Transcription factor MYC2 OS=Arabidopsis thaliana OX=3702 GN=MYC2 PE=1 SV=2	transcription factor MYC2-like [Helianthus annuus]
Unigene202135	42.7352	690.978	4.00162	5.96478e-146	1.88425e-143	up	--	--	--	K13422|8e-96|vvi:100246135|MYC2;MYC2|hypothetical protein LOC100246135	--	--	bHLH-MYC and R2R3-MYB transcription factors N-terminal;; Helix-loop-helix DNA-binding domain	Transcription factor bHLH14 OS=Arabidopsis thaliana OX=3702 GN=BHLH14 PE=1 SV=1	transcription factor MYC2-like [Helianthus annuus]
SA
NPR	Ankyrin repeat-containing protein NPR
Unigene035886	0	22.1915	5.66254	8.03518e-08	4.07655e-07	up	--	--	--	--	[R]	General function prediction only	Domain of unknown function;; Ankyrin repeats (3 copies);; Ankyrin repeats (many copies);; Ankyrin repeats (many copies);; Ankyrin repeat	Ankyrin repeat-containing protein NPR4 OS=Oryza sativa subsp. japonica OX=39947 GN=NPR4 PE=2 SV=1	protein ACCELERATED CELL DEATH 6-like isoform X1 [Lactuca sativa]
Unigene012137	0	20.4104	5.54884	1.67114e-07	8.12271e-07	up	--	--	--	--	[R]	General function prediction only	Domain of unknown function	Ankyrin repeat-containing protein NPR4 OS=Oryza sativa subsp. japonica OX=39947 GN=NPR4 PE=2 SV=1	uncharacterized protein LOC111892083 isoform X2 [Lactuca sativa]
Unigene011878	4.00658	146.149	5.04901	3.49507e-30	9.03913e-29	up	--	--	--	--	[R]	General function prediction only	Domain of unknown function	Ankyrin repeat-containing protein NPR4 OS=Oryza sativa subsp. japonica OX=39947 GN=NPR4 PE=2 SV=1	uncharacterized protein LOC111893569 [Lactuca sativa]
Unigene126719	1.46133	55.573	4.90942	1.97989e-13	1.88859e-12	up	--	--	--	--	[R]	General function prediction only	Domain of unknown function;; Ankyrin repeats (3 copies);; Ankyrin repeats (many copies);; Ankyrin repeat;; Ankyrin repeats (many copies);; Ankyrin repeat	Ankyrin repeat-containing protein NPR4 OS=Oryza sativa subsp. japonica OX=39947 GN=NPR4 PE=2 SV=1	uncharacterized protein LOC111893569 [Lactuca sativa]
Unigene067285	0	11.3519	4.72292	2.17427e-05	7.62386e-05	up	--	--	--	--	[R]	General function prediction only	Domain of unknown function	Ankyrin repeat-containing protein NPR4 OS=Oryza sativa subsp. japonica OX=39947 GN=NPR4 PE=2 SV=1	hypothetical protein LSAT_4X105500 [Lactuca sativa]
Unigene073372	1.07978	35.0305	4.57075	1.54282e-09	9.75238e-09	up	--	--	--	--	[R]	General function prediction only	Domain of unknown function	Ankyrin repeat-containing protein NPR4 OS=Oryza sativa subsp. japonica OX=39947 GN=NPR4 PE=2 SV=1	hypothetical protein LSAT_1X85620 [Lactuca sativa]
Unigene086063	2.91438	77.1995	4.55215	1.68818e-18	2.36093e-17	up	--	--	--	--	[R]	General function prediction only	Domain of unknown function	Ankyrin repeat-containing protein NPR4 OS=Oryza sativa subsp. japonica OX=39947 GN=NPR4 PE=2 SV=1	uncharacterized protein LOC110937942 [Helianthus annuus]
Unigene117752	0.360846	14.7452	4.29111	3.46656e-05	0.000117471	up	--	--	--	--	[R]	General function prediction only	Domain of unknown function	Ankyrin repeat-containing protein NPR4 OS=Oryza sativa subsp. japonica OX=39947 GN=NPR4 PE=2 SV=1	hypothetical protein LSAT_7X37621 [Lactuca sativa]
Unigene068225	2.27273	76.2696	4.10901	0.000166106	0.000498958	up	--	--	--	--	[R]	General function prediction only	Domain of unknown function	Ankyrin repeat-containing protein NPR4 OS=Oryza sativa subsp. japonica OX=39947 GN=NPR4 PE=2 SV=1	putative ankyrin repeat-containing domain, PGG domain protein [Helianthus annuus]
Unigene025345	0	6.15264	3.77395	0.00182644	0.00445638	up	--	--	--	--	[R]	General function prediction only	Domain of unknown function	Ankyrin repeat-containing protein NPR4 OS=Oryza sativa subsp. japonica OX=39947 GN=NPR4 PE=2 SV=1	ankyrin repeat-containing protein ITN1-like [Helianthus annuus]
Unigene085772	2.87573	40.0632	3.6136	2.99668e-10	2.06124e-09	up	--	--	--	--	[R]	General function prediction only	Domain of unknown function	Ankyrin repeat-containing protein NPR4 OS=Oryza sativa subsp. japonica OX=39947 GN=NPR4 PE=2 SV=1	putative ankyrin repeat-containing domain, PGG domain protein [Helianthus annuus]
Unigene052356	0.378789	5.20923	2.79211	0.0205998	0.0390254	up	--	--	--	--	[R]	General function prediction only	Domain of unknown function	Ankyrin repeat-containing protein NPR4 OS=Oryza sativa subsp. japonica OX=39947 GN=NPR4 PE=2 SV=1	hypothetical protein LSAT_1X85620 [Lactuca sativa]
Unigene016860	16.9812	104.469	2.60356	1.5868e-19	2.3683e-18	up	--	--	--	--	[R]	General function prediction only	Domain of unknown function	Ankyrin repeat-containing protein NPR4 OS=Oryza sativa subsp. japonica OX=39947 GN=NPR4 PE=2 SV=1	protein ACCELERATED CELL DEATH 6-like isoform X2 [Lactuca sativa]
Unigene102785	2.95026	19.5388	2.58515	6.01891e-05	0.000195395	up	--	--	--	--	[R]	General function prediction only	Domain of unknown function	Ankyrin repeat-containing protein NPR4 OS=Oryza sativa subsp. japonica OX=39947 GN=NPR4 PE=2 SV=1	putative PGG domain-containing protein [Helianthus annuus]
Unigene168642	2.91438	19.0596	2.55999	5.09625e-05	0.000167493	up	--	--	--	--	[R]	General function prediction only	Domain of unknown function;; Ankyrin repeats (3 copies)	Ankyrin repeat-containing protein NPR4 OS=Oryza sativa subsp. japonica OX=39947 GN=NPR4 PE=2 SV=1	putative ankyrin repeat-containing domain, PGG domain protein [Helianthus annuus]
Unigene086902	10.3231	53.4235	2.33292	1.87141e-09	1.17155e-08	up	--	--	--	--	[R]	General function prediction only	Domain of unknown function	Ankyrin repeat-containing protein NPR4 OS=Oryza sativa subsp. japonica OX=39947 GN=NPR4 PE=2 SV=1	Ankyrin repeat-containing protein [Cynara cardunculus var. scolymus]
Unigene084846	2.9889	16.3797	2.3197	0.000674525	0.00180013	up	--	--	--	--	[R]	General function prediction only	Domain of unknown function	Ankyrin repeat-containing protein NPR4 OS=Oryza sativa subsp. japonica OX=39947 GN=NPR4 PE=2 SV=1	ankyrin repeat-containing protein ITN1-like [Helianthus annuus]
Unigene002060	87.6749	378.185	2.1066	8.91849e-51	4.82004e-49	up	--	--	--	--	[R]	General function prediction only	Domain of unknown function	Ankyrin repeat-containing protein NPR4 OS=Oryza sativa subsp. japonica OX=39947 GN=NPR4 PE=2 SV=1	protein ACCELERATED CELL DEATH 6-like isoform X2 [Lactuca sativa]
Unigene091126	40.8689	157.507	1.93528	9.31581e-21	1.49555e-19	up	--	--	--	--	[R]	General function prediction only	Domain of unknown function	Ankyrin repeat-containing protein NPR4 OS=Oryza sativa subsp. japonica OX=39947 GN=NPR4 PE=2 SV=1	ankyrin repeat-containing protein ITN1-like [Helianthus annuus]
Unigene066170	3.2697	13.059	1.85271	0.00907233	0.0188442	up	--	--	--	--	[R]	General function prediction only	Domain of unknown function	Ankyrin repeat-containing protein NPR4 OS=Oryza sativa subsp. japonica OX=39947 GN=NPR4 PE=2 SV=1	ankyrin repeat-containing protein NPR4-like [Helianthus annuus]
Unigene038734	32.3273	108.3	1.73577	3.94486e-13	3.66204e-12	up	--	--	--	--	[R]	General function prediction only	Domain of unknown function;; Ankyrin repeats (3 copies);; Ankyrin repeats (many copies);; Ankyrin repeats (many copies);; Ankyrin repeat	Ankyrin repeat-containing protein NPR4 OS=Oryza sativa subsp. japonica OX=39947 GN=NPR4 PE=2 SV=1	ankyrin-1-like [Helianthus annuus]
Unigene050401	7.69233	20.8911	1.3944	0.00521184	0.0114697	up	--	--	--	--	[R]	General function prediction only	Ankyrin repeats (3 copies);; Ankyrin repeats (many copies);; Domain of unknown function	Ankyrin repeat-containing protein NPR4 OS=Oryza sativa subsp. japonica OX=39947 GN=NPR4 PE=2 SV=1	hypothetical protein LSAT_8X155761 [Lactuca sativa]
Unigene207339	186.185	72.5834	-1.35591	2.32443e-15	2.60268e-14	down	--	--	--	--	[R]	General function prediction only	Domain of unknown function	Ankyrin repeat-containing protein NPR4 OS=Oryza sativa subsp. japonica OX=39947 GN=NPR4 PE=2 SV=1	ankyrin repeat-containing protein ITN1-like [Helianthus annuus]
Unigene190876	18.9069	7.04975	-1.36243	0.0149399	0.0293304	down	--	--	--	--	[R]	General function prediction only	Domain of unknown function	Ankyrin repeat-containing protein NPR4 OS=Oryza sativa subsp. japonica OX=39947 GN=NPR4 PE=2 SV=1	putative ankyrin repeat-containing domain, PGG domain protein [Helianthus annuus]
Unigene079013	124.665	39.7895	-1.6375	1.83551e-12	1.60054e-11	down	--	--	--	--	[R]	General function prediction only	Domain of unknown function	Ankyrin repeat-containing protein NPR4 OS=Oryza sativa subsp. japonica OX=39947 GN=NPR4 PE=2 SV=1	hypothetical protein LSAT_8X106241 [Lactuca sativa]
Unigene093251	162.52	49.8732	-1.69962	4.36843e-20	6.74238e-19	down	--	--	--	--	[R]	General function prediction only	Domain of unknown function	Ankyrin repeat-containing protein NPR4 OS=Oryza sativa subsp. japonica OX=39947 GN=NPR4 PE=2 SV=1	hypothetical protein LSAT_8X106241 [Lactuca sativa]
Unigene116391	14.703	3.32206	-2.03113	0.00314445	0.00729005	down	--	--	--	--	[R]	General function prediction only	Domain of unknown function	Ankyrin repeat-containing protein NPR4 OS=Oryza sativa subsp. japonica OX=39947 GN=NPR4 PE=2 SV=1	ankyrin repeat-containing protein NPR4-like [Helianthus annuus]
Unigene143329	10.1907	2.08145	-2.10212	0.00863709	0.0180419	down	--	--	--	--	[R]	General function prediction only	Domain of unknown function	Ankyrin repeat-containing protein NPR4 OS=Oryza sativa subsp. japonica OX=39947 GN=NPR4 PE=2 SV=1	ankyrin repeat-containing protein At5g02620-like [Lactuca sativa]
Unigene128607	185.732	42.096	-2.12979	2.96356e-26	6.36461e-25	down	--	--	--	--	[R]	General function prediction only	Domain of unknown function	Ankyrin repeat-containing protein NPR4 OS=Oryza sativa subsp. japonica OX=39947 GN=NPR4 PE=2 SV=1	uncharacterized protein LOC110937942 [Helianthus annuus]
Unigene204847	77.2406	11.9404	-2.65391	5.20633e-16	6.13037e-15	down	--	--	--	--	[R]	General function prediction only	Domain of unknown function;; Ankyrin repeats (3 copies);; Ankyrin repeats (many copies);; Ankyrin repeat	Ankyrin repeat-containing protein NPR4 OS=Oryza sativa subsp. japonica OX=39947 GN=NPR4 PE=2 SV=1	Ankyrin repeat-containing protein [Cynara cardunculus var. scolymus]
Unigene196868	29.7937	4.12158	-2.75531	2.52219e-07	1.19448e-06	down	--	--	--	--	[R]	General function prediction only	Domain of unknown function	Ankyrin repeat-containing protein NPR4 OS=Oryza sativa subsp. japonica OX=39947 GN=NPR4 PE=2 SV=1	protein ACCELERATED CELL DEATH 6-like isoform X2 [Lactuca sativa]
Unigene175209	23.7504	1.83234	-2.999	0.00651648	0.014018	down	--	--	--	--	[R]	General function prediction only	Ankyrin repeats (3 copies);; Ankyrin repeats (many copies);; Ankyrin repeats (many copies);; Domain of unknown function	Ankyrin repeat-containing protein NPR4 OS=Oryza sativa subsp. japonica OX=39947 GN=NPR4 PE=2 SV=1	ankyrin repeat-containing protein ITN1-like [Helianthus annuus]
Unigene176261	91.026	9.09896	-3.27643	1.97577e-22	3.49255e-21	down	--	--	--	--	--	--	--	BTB/POZ domain and ankyrin repeat-containing protein NPR2 OS=Oryza sativa subsp. japonica OX=39947 GN=NPR2 PE=1 SV=1	PREDICTED: regulatory protein NPR3 [Vigna angularis]
Unigene035505	14.1235	0.902099	-3.52446	6.71953e-05	0.000216431	down	--	--	--	--	[R]	General function prediction only	Domain of unknown function	Ankyrin repeat-containing protein NPR4 OS=Oryza sativa subsp. japonica OX=39947 GN=NPR4 PE=2 SV=1	ankyrin repeat-containing protein NPR4-like [Helianthus annuus]
Unigene000985	252.951	18.3281	-3.75653	1.45192e-64	1.15523e-62	down	--	--	--	--	[R]	General function prediction only	Ankyrin repeats (3 copies);; Ankyrin repeats (many copies);; Ankyrin repeat;; Ankyrin repeats (many copies);; Ankyrin repeat;; Domain of unknown function	Ankyrin repeat-containing protein NPR4 OS=Oryza sativa subsp. japonica OX=39947 GN=NPR4 PE=2 SV=1	protein ACCELERATED CELL DEATH 6-like [Lactuca sativa]
Unigene147746	53.1426	3.54802	-3.79691	3.30279e-15	3.6577e-14	down	--	--	--	--	[R]	General function prediction only	Ankyrin repeats (3 copies);; Ankyrin repeats (many copies);; Ankyrin repeats (3 copies);; Domain of unknown function	Ankyrin repeat-containing protein NPR4 OS=Oryza sativa subsp. japonica OX=39947 GN=NPR4 PE=2 SV=1	Ankyrin repeat-containing protein [Cynara cardunculus var. scolymus]
Unigene129875	21.6046	0.893018	-4.18434	1.36798e-07	6.72719e-07	down	--	--	--	--	[R]	General function prediction only	Domain of unknown function	Ankyrin repeat-containing protein NPR4 OS=Oryza sativa subsp. japonica OX=39947 GN=NPR4 PE=2 SV=1	ankyrin repeat-containing protein ITN1-like [Helianthus annuus]
Unigene105961	137.871	6.38359	-4.35411	2.98542e-36	9.91277e-35	down	--	--	--	--	[R]	General function prediction only	Domain of unknown function	Ankyrin repeat-containing protein NPR4 OS=Oryza sativa subsp. japonica OX=39947 GN=NPR4 PE=2 SV=1	Ankyrin repeat-containing protein [Cynara cardunculus var. scolymus]
Unigene170692	283.389	11.3197	-4.59644	2.72671e-70	2.4859e-68	down	--	--	--	--	[R]	General function prediction only	Domain of unknown function	Ankyrin repeat-containing protein NPR4 OS=Oryza sativa subsp. japonica OX=39947 GN=NPR4 PE=2 SV=1	uncharacterized protein LOC110937942 [Helianthus annuus]
Unigene099887	68.1325	2.35461	-4.65585	1.03544e-16	1.28266e-15	down	--	--	--	--	[R]	General function prediction only	Ankyrin repeat;; Ankyrin repeats (many copies);; Domain of unknown function	Ankyrin repeat-containing protein NPR4 OS=Oryza sativa subsp. japonica OX=39947 GN=NPR4 PE=2 SV=1	ankyrin repeat-containing protein NPR4-like [Helianthus annuus]
Unigene106728	281.403	2.06329	-6.85311	2.28553e-42	9.38089e-41	down	--	--	--	--	[R]	General function prediction only	Ankyrin repeats (3 copies);; Ankyrin repeats (many copies);; Ankyrin repeats (many copies);; Ankyrin repeat;; Ankyrin repeat;; Domain of unknown function	Ankyrin repeat-containing protein NPR4 OS=Oryza sativa subsp. japonica OX=39947 GN=NPR4 PE=2 SV=1	uncharacterized protein LOC111889606 [Lactuca sativa]
Unigene182214	53.1004	0	-7.06118	7.09756e-12	5.83729e-11	down	--	--	--	--	[R]	General function prediction only	Domain of unknown function	Ankyrin repeat-containing protein NPR4 OS=Oryza sativa subsp. japonica OX=39947 GN=NPR4 PE=2 SV=1	ankyrin repeat-containing protein ITN1-like [Helianthus annuus]
Unigene144866	575.446	3.5571	-7.201	2.54492e-73	2.46358e-71	down	--	--	--	--	[R]	General function prediction only	Domain of unknown function	Ankyrin repeat-containing protein NPR4 OS=Oryza sativa subsp. japonica OX=39947 GN=NPR4 PE=2 SV=1	putative ankyrin repeat-containing domain, PGG domain protein [Helianthus annuus]
Unigene109670	219.61	0	-8.86265	3.31343e-19	4.84707e-18	down	--	--	--	--	[R]	General function prediction only	Domain of unknown function	Ankyrin repeat-containing protein NPR4 OS=Oryza sativa subsp. japonica OX=39947 GN=NPR4 PE=2 SV=1	hypothetical protein LSAT_1X85620 [Lactuca sativa]
Unigene095360	229.655	0	-8.92065	1.5493e-19	2.31418e-18	down	--	--	--	--	[R]	General function prediction only	Domain of unknown function	Ankyrin repeat-containing protein NPR4 OS=Oryza sativa subsp. japonica OX=39947 GN=NPR4 PE=2 SV=1	ankyrin repeat-containing protein ITN1-like [Helianthus annuus]
TGA	Transcription factor TGA
Unigene185030	11.3436	98.9903	3.08453	1.44258e-21	2.42255e-20	up	--	--	--	K14431|4e-37|vvi:100255706|TGA;TGA|hypothetical protein LOC100255706; K14431 transcription factor TGA	--	--	bZIP transcription factor;; Basic region leucine zipper	Transcription factor TGA1 OS=Arabidopsis thaliana OX=3702 GN=TGA1 PE=1 SV=2	transcription factor TGA4-like [Helianthus annuus]
Unigene048975	111.73	280.373	1.32632	1.25885e-22	2.2485e-21	up	--	--	Molecular Function: DNA-binding transcription factor activity (GO:0003700);; Biological Process: regulation of transcription, DNA-templated (GO:0006355);; Molecular Function: sequence-specific DNA binding (GO:0043565);;	K14431|1e-107|vvi:100255706|TGA;TGA|hypothetical protein LOC100255706; K14431 transcription factor TGA	--	--	Seed dormancy control;; bZIP transcription factor;; Basic region leucine zipper	Transcription factor TGA1 OS=Arabidopsis thaliana OX=3702 GN=TGA1 PE=1 SV=2	transcription factor TGA1-like [Lactuca sativa]
Unigene077316	524.998	250.327	-1.06604	1.32335e-28	3.17935e-27	down	--	--	Molecular Function: DNA-binding transcription factor activity (GO:0003700);; Molecular Function: protein binding (GO:0005515);; Biological Process: regulation of transcription, DNA-templated (GO:0006355);; Molecular Function: sequence-specific DNA binding (GO:0043565);;	K14431|1e-44|osa:4326907|TGA;TGA|Os01g0279900; K14431 transcription factor TGA	--	--	--	Transcription factor TGA2.3 OS=Oryza sativa subsp. japonica OX=39947 GN=TGA2.3 PE=1 SV=1	transcription factor TGA2.3-like [Helianthus annuus]
Unigene038820	2.87297	43.2024	3.72359	3.03871e-11	2.33714e-10	up	--	--	--	K14431|6e-32|rcu:RCOM_1033270|TGA;TGA|Transcription factor TGA7, putative; K14431 transcription factor TGA	--	--	bZIP transcription factor;; Basic region leucine zipper	Transcription factor TGA3 OS=Arabidopsis thaliana OX=3702 GN=TGA3 PE=1 SV=1	transcription factor TGA7-like [Helianthus annuus]
Unigene019050	47.0323	125.913	1.4108	6.06918e-11	4.51711e-10	up	--	--	Biological Process: transcription, DNA-templated (GO:0006351);;	K14431|6e-17|pop:POPTR_562720|TGA;TGA|hypothetical protein; K14431 transcription factor TGA	--	--	--	Transcription factor TGA4 OS=Arabidopsis thaliana OX=3702 GN=TGA4 PE=1 SV=2	transcription factor TGA7-like [Helianthus annuus]
Unigene166914	14.5967	0	-5.33298	1.037e-06	4.48029e-06	down	--	--	--	--	--	--	--	Transcription factor TGA9 OS=Arabidopsis thaliana OX=3702 GN=TGA9 PE=1 SV=1	Basic-leucine zipper domain-containing protein [Cynara cardunculus var. scolymus]
Unigene090653	12.8242	26.0217	1.00101	0.0149219	0.0292994	up	--	--	Molecular Function: DNA-binding transcription factor activity (GO:0003700);; Biological Process: regulation of transcription, DNA-templated (GO:0006355);; Molecular Function: sequence-specific DNA binding (GO:0043565);;	K14431|0.0|vvi:100262335|TGA;TGA|hypothetical protein LOC100262335; K14431 transcription factor TGA	--	--	Seed dormancy control;; bZIP transcription factor;; Basic region leucine zipper	bZIP transcription factor TGA10 OS=Nicotiana tabacum OX=4097 GN=TGA10 PE=1 SV=1	bZIP transcription factor TGA10 isoform X2 [Lactuca sativa]
PR-1
Unigene014173	34.1922	232.042	2.75518	2.33614e-44	1.02745e-42	up	[S]	Function unknown	Cellular Component: extracellular region (GO:0005576);;	--	[S]	Function unknown	Cysteine-rich secretory protein family	Pathogenesis-related protein PR-1 OS=Medicago truncatula OX=3880 GN=PR-1 PE=2 SV=1	pathogenesis-related protein PR-1-like [Lactuca sativa]
Unigene054026	6.60151	25.0548	1.86295	0.000175245	0.000524042	up	[S]	Function unknown	Cellular Component: extracellular region (GO:0005576);;	--	[S]	Function unknown	Cysteine-rich secretory protein family	Pathogenesis-related protein PR-1 OS=Medicago truncatula OX=3880 GN=PR-1 PE=2 SV=1	pathogenesis-related protein PR-1-like [Helianthus annuus]
Unigene155845	9.09431	32.7834	1.80007	3.91898e-05	0.000131401	up	[S]	Function unknown	Cellular Component: extracellular region (GO:0005576);;	--	[S]	Function unknown	Cysteine-rich secretory protein family	Pathogenesis-related protein PR-1 OS=Medicago truncatula OX=3880 GN=PR-1 PE=2 SV=1	pathogenesis-related protein PR-1-like [Lactuca sativa]
Ethylene
SAM
Unigene180892	9.13019	0	-4.63622	5.4147e-05	0.000177176	down	[H]	Coenzyme transport and metabolism	Molecular Function: methionine adenosyltransferase activity (GO:0004478);; Molecular Function: ATP binding (GO:0005524);; Cellular Component: cytoplasm (GO:0005737);; Biological Process: S-adenosylmethionine biosynthetic process (GO:0006556);; Biological Process: one-carbon metabolic process (GO:0006730);; Molecular Function: metal ion binding (GO:0046872);;	K00789|6e-96|osa:4337733|metK;EC:2.5.1.6|Os05g0135700; K00789 S-adenosylmethionine synthetase [EC:2.5.1.6]	[H]	Coenzyme transport and metabolism	S-adenosylmethionine synthetase, C-terminal domain	S-adenosylmethionine synthase 1 OS=Oryza sativa subsp. japonica OX=39947 GN=SAM1 PE=2 SV=1	hypothetical protein OsI_18360 [Oryza sativa Indica Group]
Unigene114875	6.15785	0.564478	-2.71603	0.0149916	0.0294208	down	[H]	Coenzyme transport and metabolism	Molecular Function: methionine adenosyltransferase activity (GO:0004478);; Molecular Function: ATP binding (GO:0005524);; Biological Process: S-adenosylmethionine biosynthetic process (GO:0006556);; Biological Process: one-carbon metabolic process (GO:0006730);; Molecular Function: metal ion binding (GO:0046872);;	K00789|1e-42|cme:CMN227C|metK;EC:2.5.1.6|S-adenosylmethionine synthetase; K00789 S-adenosylmethionine synthetase [EC:2.5.1.6]	[H]	Coenzyme transport and metabolism	S-adenosylmethionine synthetase, C-terminal domain	S-adenosylmethionine synthase 1 OS=Pinus contorta OX=3339 GN=SAMS1 PE=2 SV=1	S-Adenosylmethionine synthetase [Dorcoceras hygrometricum]
Unigene142521	14.2138	1.80919	-2.76852	0.000237618	0.000693116	down	[H]	Coenzyme transport and metabolism	Molecular Function: nucleotide binding (GO:0000166);; Biological Process: sulfur compound metabolic process (GO:0006790);; Molecular Function: transferase activity (GO:0016740);; Molecular Function: ion binding (GO:0043167);; Biological Process: primary metabolic process (GO:0044238);; Biological Process: small molecule metabolic process (GO:0044281);; Cellular Component: intracellular part (GO:0…	K00789|1e-120|pop:POPTR_564333|metK;EC:2.5.1.6|AdoMet1; s-adenosylmethionine synthetase 1 (EC:2.5.1.6); K00789 S-adenosylmethionine synthetase [EC:2.5.1.6]	[H]	Coenzyme transport and metabolism	S-adenosylmethionine synthetase, C-terminal domain;; S-adenosylmethionine synthetase, central domain;; S-adenosylmethionine synthetase, N-terminal domain;; Methyltransferase domain;; Methyltransferase domain;; Methyltransferase domain;; ubiE/COQ5 methyltransferase family	S-adenosylmethionine synthase 2 OS=Atriplex nummularia OX=3553 GN=SAMS2 PE=1 SV=1	S-Adenosylmethionine synthetase [Dorcoceras hygrometricum]
Unigene026047	121.745	589.219	2.2715	1.04424e-90	1.46851e-88	up	--	--	Molecular Function: methionine adenosyltransferase activity (GO:0004478);; Molecular Function: ATP binding (GO:0005524);; Biological Process: S-adenosylmethionine biosynthetic process (GO:0006556);;	K00789|4e-32|ppp:PHYPADRAFT_187695|metK;EC:2.5.1.6|hypothetical protein	[H]	Coenzyme transport and metabolism	S-adenosylmethionine synthetase, N-terminal domain	S-adenosylmethionine synthase 2 OS=Populus trichocarpa OX=3694 GN=METK2 PE=2 SV=2	S-adenosylmethionine synthase, partial [Nicotiana tabacum]
Unigene112434	1072.9	472.665	-1.18085	2.87957e-50	1.53509e-48	down	[H]	Coenzyme transport and metabolism	Molecular Function: methionine adenosyltransferase activity (GO:0004478);; Molecular Function: ATP binding (GO:0005524);; Biological Process: S-adenosylmethionine biosynthetic process (GO:0006556);; Biological Process: one-carbon metabolic process (GO:0006730);; Molecular Function: metal ion binding (GO:0046872);;	K00789|0.0|vvi:100244176|metK;EC:2.5.1.6|METK2; S-adenosylmethionine synthetase 2; K00789 S-adenosylmethionine synthetase [EC:2.5.1.6]	[H]	Coenzyme transport and metabolism	S-adenosylmethionine synthetase, C-terminal domain;; S-adenosylmethionine synthetase, central domain	S-adenosylmethionine synthase 2 OS=Solanum lycopersicum OX=4081 GN=SAM2 PE=2 SV=1	S-adenosylmethionine synthase 5-like [Lactuca sativa]
Unigene000129	2.18992	9.96155	1.95263	0.0241316	0.0447043	up	--	--	--	K00789|1e-06|ppp:PHYPADRAFT_187695|metK;EC:2.5.1.6|hypothetical protein	[H]	Coenzyme transport and metabolism	--	S-adenosylmethionine synthase 4 OS=Brassica juncea OX=3707 GN=MSAMS4 PE=2 SV=1	--
Unigene164520	3.96517	0	-3.16326	0.0176821	0.0341329	down	[H]	Coenzyme transport and metabolism	Molecular Function: methionine adenosyltransferase activity (GO:0004478);; Molecular Function: ATP binding (GO:0005524);; Cellular Component: nucleus (GO:0005634);; Cellular Component: cytosol (GO:0005829);; Biological Process: methionine metabolic process (GO:0006555);; Biological Process: S-adenosylmethionine biosynthetic process (GO:0006556);; Biological Process: one-carbon metabolic process (…	K00789|1e-48|cre:CHLREDRAFT_182408|metK;EC:2.5.1.6|METM; S-Adenosylmethionine synthetase (EC:2.5.1.6); K00789 S-adenosylmethionine synthetase [EC:2.5.1.6]	[H]	Coenzyme transport and metabolism	S-adenosylmethionine synthetase, central domain	S-adenosylmethionine synthase OS=Chlamydomonas reinhardtii OX=3055 GN=METM PE=3 SV=1	S-adenosylmethionine synthase, partial [Rachicladosporium sp. CCFEE 5018]
Unigene168207	21.4246	0.582639	-4.54304	2.79786e-07	1.31636e-06	down	[H]	Coenzyme transport and metabolism	Molecular Function: methionine adenosyltransferase activity (GO:0004478);; Molecular Function: ATP binding (GO:0005524);; Cellular Component: nucleus (GO:0005634);; Cellular Component: cytosol (GO:0005829);; Biological Process: methionine metabolic process (GO:0006555);; Biological Process: S-adenosylmethionine biosynthetic process (GO:0006556);; Biological Process: one-carbon metabolic process (…	K00789|5e-55|cme:CMN227C|metK;EC:2.5.1.6|S-adenosylmethionine synthetase; K00789 S-adenosylmethionine synthetase [EC:2.5.1.6]	[H]	Coenzyme transport and metabolism	S-adenosylmethionine synthetase, C-terminal domain	S-adenosylmethionine synthase OS=Triticum aestivum OX=4565 GN=SAMS PE=2 SV=1	hypothetical protein MYCFIDRAFT_204187 [Pseudocercospora fijiensis CIRAD86]
ACO	1-aminocyclopropane-1-carboxylate oxidase
Unigene082298	0	37.6673	6.34746	9.50384e-10	6.1668e-09	up	--	--	Biological Process: MAPK cascade (GO:0000165);; Cellular Component: cytoplasm (GO:0005737);; Biological Process: protein targeting to membrane (GO:0006612);; Biological Process: detection of biotic stimulus (GO:0009595);; Biological Process: ethylene biosynthetic process (GO:0009693);; Biological Process: salicylic acid biosynthetic process (GO:0009697);; Molecular Function: 1-aminocyclopropane-1…	K05933|1e-17|ath:AT1G05010|E1.14.17.4;EC:1.14.17.4|EFE; EFE (ETHYLENE-FORMING ENZYME); 1-aminocyclopropane-1-carboxylate oxidase (EC:1.14.11.9); K05933 aminocyclopropanecarboxylate oxidase [EC:1.14.17.4]	[QR]	--	--	1-aminocyclopropane-1-carboxylate oxidase 4 OS=Arabidopsis thaliana OX=3702 GN=ACO4 PE=1 SV=2	1-aminocyclopropane-1-carboxylic acid oxidase, partial [Helianthus annuus]
Unigene046893	0	19.3228	5.47673	2.53967e-07	1.20218e-06	up	[R]	General function prediction only	--	--	[QR]	--	2OG-Fe(II) oxygenase superfamily	1-aminocyclopropane-1-carboxylate oxidase homolog 1 OS=Arabidopsis thaliana OX=3702 GN=At1g06620 PE=2 SV=1	1-aminocyclopropane-1-carboxylate oxidase homolog 1-like [Helianthus annuus]
Unigene071188	0.360846	29.8793	5.29568	2.44162e-08	1.32798e-07	up	--	--	--	--	[QR]	--	--	1-aminocyclopropane-1-carboxylate oxidase homolog 3 OS=Arabidopsis thaliana OX=3702 GN=At1g06650 PE=2 SV=1	Non-heme dioxygenase N-terminal domain-containing protein [Cynara cardunculus var. scolymus]
Unigene020812	0.378789	24.9063	5.03411	2.17859e-07	1.04147e-06	up	--	--	Molecular Function: oxidoreductase activity, acting on paired donors, with incorporation or reduction of molecular oxygen, 2-oxoglutarate as one donor, and incorporation of one atom each of oxygen into both donors (GO:0016706);; Molecular Function: metal ion binding (GO:0046872);; Biological Process: oxidation-reduction process (GO:0055114);;	--	[QR]	--	--	1-aminocyclopropane-1-carboxylate oxidase homolog 3 OS=Arabidopsis thaliana OX=3702 GN=At1g06650 PE=2 SV=1	uncharacterized protein LOC110932635 [Helianthus annuus]
Unigene149073	2.18992	54.797	4.41932	7.88994e-14	7.7841e-13	up	--	--	--	--	--	--	non-haem dioxygenase in morphine synthesis N-terminal;; 2OG-Fe(II) oxygenase superfamily	1-aminocyclopropane-1-carboxylate oxidase 5 OS=Arabidopsis thaliana OX=3702 GN=At1g77330 PE=2 SV=1	hypothetical protein Ccrd_023806 [Cynara cardunculus var. scolymus]
Unigene082003	1.83184	45.0814	4.36334	6.34188e-12	5.24041e-11	up	--	--	--	--	[QR]	--	non-haem dioxygenase in morphine synthesis N-terminal	1-aminocyclopropane-1-carboxylate oxidase homolog OS=Solanum lycopersicum OX=4081 GN=ACO3 PE=2 SV=1	hypothetical protein LSAT_3X121220 [Lactuca sativa]
Unigene036707	0	8.86303	4.32881	0.000176114	0.000526407	up	--	--	--	--	[QR]	--	--	1-aminocyclopropane-1-carboxylate oxidase homolog 2 OS=Arabidopsis thaliana OX=3702 GN=At1g06640 PE=2 SV=1	hypothetical protein LSAT_3X121220 [Lactuca sativa]
Unigene055651	1.07426	16.7463	3.5362	1.97486e-05	6.97311e-05	up	--	--	--	--	[QR]	--	non-haem dioxygenase in morphine synthesis N-terminal	1-aminocyclopropane-1-carboxylate oxidase homolog 3 OS=Arabidopsis thaliana OX=3702 GN=At1g06650 PE=2 SV=1	1-aminocyclopropane-1-carboxylate oxidase homolog 1-like [Helianthus annuus]
Unigene063203	5.47066	50.7062	3.12669	3.93438e-12	3.32039e-11	up	--	--	--	--	--	--	non-haem dioxygenase in morphine synthesis N-terminal;; 2OG-Fe(II) oxygenase superfamily	1-aminocyclopropane-1-carboxylate oxidase 5 OS=Arabidopsis thaliana OX=3702 GN=At1g77330 PE=2 SV=1	gibberellin 3-beta-dioxygenase 4-like [Lactuca sativa]
Unigene082058	5.47066	26.1325	2.17761	1.63115e-05	5.83594e-05	up	--	--	Molecular Function: oxidoreductase activity, acting on paired donors, with incorporation or reduction of molecular oxygen, 2-oxoglutarate as one donor, and incorporation of one atom each of oxygen into both donors (GO:0016706);; Molecular Function: metal ion binding (GO:0046872);; Biological Process: oxidation-reduction process (GO:0055114);;	--	[QR]	--	--	1-aminocyclopropane-1-carboxylate oxidase homolog 3 OS=Arabidopsis thaliana OX=3702 GN=At1g06650 PE=2 SV=1	uncharacterized protein LOC110932635 [Helianthus annuus]
Unigene025645	15.9697	70.2724	2.09876	6.17976e-10	4.09435e-09	up	[R]	General function prediction only	Molecular Function: oxidoreductase activity (GO:0016491);;	--	[QR]	--	2OG-Fe(II) oxygenase superfamily;; non-haem dioxygenase in morphine synthesis N-terminal	1-aminocyclopropane-1-carboxylate oxidase homolog 6 OS=Arabidopsis thaliana OX=3702 GN=At1g04350 PE=2 SV=1	ACO1 [Carthamus tinctorius]
Unigene152803	6.60151	22.4619	1.70929	0.000960453	0.00248592	up	--	--	--	--	[QR]	--	non-haem dioxygenase in morphine synthesis N-terminal	1-aminocyclopropane-1-carboxylate oxidase homolog OS=Solanum lycopersicum OX=4081 GN=ACO3 PE=2 SV=1	hypothetical protein LSAT_3X121220 [Lactuca sativa]
Unigene152258	12.0363	37.4322	1.60415	3.17943e-05	0.000108403	up	--	--	--	--	[QR]	--	--	1-aminocyclopropane-1-carboxylate oxidase homolog 12 OS=Arabidopsis thaliana OX=3702 GN=At5g59540 PE=2 SV=1	hypothetical protein LSAT_3X121280 [Lactuca sativa]
Unigene059640	19.7286	54.3386	1.44366	4.03387e-06	1.58872e-05	up	[R]	General function prediction only	Molecular Function: oxidoreductase activity (GO:0016491);;	--	[QR]	--	2OG-Fe(II) oxygenase superfamily;; non-haem dioxygenase in morphine synthesis N-terminal	1-aminocyclopropane-1-carboxylate oxidase homolog 1 OS=Arabidopsis thaliana OX=3702 GN=At1g06620 PE=2 SV=1	1-aminocyclopropane-1-carboxylate oxidase homolog 1-like [Lactuca sativa]
Unigene117404	7.31078	18.9207	1.32758	0.0095239	0.0196464	up	--	--	--	--	[QR]	--	--	1-aminocyclopropane-1-carboxylate oxidase homolog 3 OS=Arabidopsis thaliana OX=3702 GN=At1g06650 PE=2 SV=1	1-aminocyclopropane-1-carboxylate oxidase homolog 1-like [Lactuca sativa]
Unigene080050	9.81462	21.1393	1.0683	0.0269706	0.0492069	up	[R]	General function prediction only	Molecular Function: oxidoreductase activity, acting on paired donors, with incorporation or reduction of molecular oxygen, 2-oxoglutarate as one donor, and incorporation of one atom each of oxygen into both donors (GO:0016706);; Molecular Function: metal ion binding (GO:0046872);; Biological Process: oxidation-reduction process (GO:0055114);;	K05933|1e-175|rcu:RCOM_0562170|E1.14.17.4;EC:1.14.17.4|1-aminocyclopropane-1-carboxylate oxidase, putative (EC:1.14.17.4); K05933 aminocyclopropanecarboxylate oxidase [EC:1.14.17.4]	[QR]	--	2OG-Fe(II) oxygenase superfamily;; non-haem dioxygenase in morphine synthesis N-terminal	1-aminocyclopropane-1-carboxylate oxidase 5 OS=Arabidopsis thaliana OX=3702 GN=At1g77330 PE=2 SV=1	1-aminocyclopropane-1-carboxylate oxidase 5-like [Helianthus annuus]
Unigene122451	26.5709	53.6516	1.00035	0.000927426	0.00240869	up	--	--	--	--	[QR]	--	non-haem dioxygenase in morphine synthesis N-terminal	1-aminocyclopropane-1-carboxylate oxidase homolog OS=Solanum lycopersicum OX=4081 GN=ACO3 PE=2 SV=1	hypothetical protein LSAT_3X121220 [Lactuca sativa]
Unigene128767	157.572	73.2912	-1.1016	1.28513e-10	9.22833e-10	down	[R]	General function prediction only	--	--	[QR]	--	2OG-Fe(II) oxygenase superfamily	1-aminocyclopropane-1-carboxylate oxidase homolog 1 OS=Arabidopsis thaliana OX=3702 GN=At1g06620 PE=2 SV=1	putative oxoglutarate/iron-dependent dioxygenase, Isopenicillin N synthase-like protein [Helianthus annuus]
Unigene140242	587.592	273.263	-1.10284	4.5599e-33	1.32433e-31	down	--	--	Molecular Function: oxidoreductase activity (GO:0016491);;	--	[QR]	--	2OG-Fe(II) oxygenase superfamily	1-aminocyclopropane-1-carboxylate oxidase homolog 1 OS=Arabidopsis thaliana OX=3702 GN=At1g06620 PE=2 SV=1	1-aminocyclopropane-1-carboxylate oxidase homolog 1-like [Helianthus annuus]
Unigene184864	838.589	384.948	-1.12103	5.45049e-45	2.4597e-43	down	[R]	General function prediction only	--	--	[QR]	--	2OG-Fe(II) oxygenase superfamily;; non-haem dioxygenase in morphine synthesis N-terminal	1-aminocyclopropane-1-carboxylate oxidase homolog 1 OS=Arabidopsis thaliana OX=3702 GN=At1g06620 PE=2 SV=1	1-aminocyclopropane-1-carboxylate oxidase homolog 1-like [Lactuca sativa]
Unigene103864	626.984	274.266	-1.19064	1.71264e-38	6.16844e-37	down	[R]	General function prediction only	Molecular Function: 1-aminocyclopropane-1-carboxylate oxidase activity (GO:0009815);; Molecular Function: oxidoreductase activity, acting on paired donors, with incorporation or reduction of molecular oxygen, 2-oxoglutarate as one donor, and incorporation of one atom each of oxygen into both donors (GO:0016706);; Molecular Function: metal ion binding (GO:0046872);; Biological Process: oxidation-r…	K05933|4e-63|rcu:RCOM_2065200|E1.14.17.4;EC:1.14.17.4|1-aminocyclopropane-1-carboxylate oxidase, putative (EC:1.14.17.4); K05933 aminocyclopropanecarboxylate oxidase [EC:1.14.17.4]	[QR]	--	2OG-Fe(II) oxygenase superfamily;; non-haem dioxygenase in morphine synthesis N-terminal	1-aminocyclopropane-1-carboxylate oxidase 4 OS=Petunia hybrida OX=4102 GN=ACO4 PE=3 SV=1	1-aminocyclopropane-q-carboxylate oxidase [Chrysanthemum x morifolium]
Unigene163313	46.6963	19.5438	-1.23581	0.000451217	0.00124674	down	[R]	General function prediction only	Molecular Function: oxidoreductase activity, acting on paired donors, with incorporation or reduction of molecular oxygen, 2-oxoglutarate as one donor, and incorporation of one atom each of oxygen into both donors (GO:0016706);; Molecular Function: metal ion binding (GO:0046872);; Biological Process: oxidation-reduction process (GO:0055114);;	--	[QR]	--	2OG-Fe(II) oxygenase superfamily;; non-haem dioxygenase in morphine synthesis N-terminal	1-aminocyclopropane-1-carboxylate oxidase homolog 1 OS=Arabidopsis thaliana OX=3702 GN=At1g06620 PE=2 SV=1	1-aminocyclopropane-1-carboxylate oxidase homolog 1-like [Lactuca sativa]
Unigene178630	1766.42	701.739	-1.33132	9.42455e-116	2.03225e-113	down	[R]	General function prediction only	Biological Process: ethylene biosynthetic process (GO:0009693);; Molecular Function: 1-aminocyclopropane-1-carboxylate oxidase activity (GO:0009815);; Biological Process: fruit ripening (GO:0009835);; Molecular Function: oxidoreductase activity, acting on paired donors, with incorporation or reduction of molecular oxygen, 2-oxoglutarate as one donor, and incorporation of one atom each of oxygen i…	K05933|1e-140|vvi:100256784|E1.14.17.4;EC:1.14.17.4|hypothetical protein LOC100256784; K05933 aminocyclopropanecarboxylate oxidase [EC:1.14.17.4]	[QR]	--	2OG-Fe(II) oxygenase superfamily;; non-haem dioxygenase in morphine synthesis N-terminal	1-aminocyclopropane-1-carboxylate oxidase 3 OS=Petunia hybrida OX=4102 GN=ACO3 PE=3 SV=1	putative oxoglutarate/iron-dependent dioxygenase [Helianthus annuus]
Unigene043177	764.87	286.927	-1.41336	5.02336e-60	3.54559e-58	down	[R]	General function prediction only	Molecular Function: oxidoreductase activity, acting on paired donors, with incorporation or reduction of molecular oxygen, 2-oxoglutarate as one donor, and incorporation of one atom each of oxygen into both donors (GO:0016706);; Molecular Function: metal ion binding (GO:0046872);; Biological Process: oxidation-reduction process (GO:0055114);;	--	[QR]	--	2OG-Fe(II) oxygenase superfamily;; non-haem dioxygenase in morphine synthesis N-terminal	1-aminocyclopropane-1-carboxylate oxidase homolog 6 OS=Arabidopsis thaliana OX=3702 GN=At1g04350 PE=2 SV=1	ACO1 [Carthamus tinctorius]
Unigene021606	137.37	47.3703	-1.50216	0.000491675	0.00134823	down	--	--	Molecular Function: iron ion binding (GO:0005506);; Molecular Function: desacetoxyvindoline 4-hydroxylase activity (GO:0050590);; Biological Process: oxidation-reduction process (GO:0055114);;	--	[QR]	--	--	1-aminocyclopropane-1-carboxylate oxidase homolog 3 OS=Arabidopsis thaliana OX=3702 GN=At1g06650 PE=2 SV=1	1-aminocyclopropane-1-carboxylate oxidase homolog 1-like [Lactuca sativa]
Unigene106033	737.157	249.51	-1.56028	2.74655e-68	2.39538e-66	down	[R]	General function prediction only	Molecular Function: oxidoreductase activity, acting on paired donors, with incorporation or reduction of molecular oxygen, 2-oxoglutarate as one donor, and incorporation of one atom each of oxygen into both donors (GO:0016706);; Molecular Function: metal ion binding (GO:0046872);; Biological Process: oxidation-reduction process (GO:0055114);;	--	[QR]	--	2OG-Fe(II) oxygenase superfamily	1-aminocyclopropane-1-carboxylate oxidase homolog 11 OS=Arabidopsis thaliana OX=3702 GN=At5g59530 PE=2 SV=1	1-aminocyclopropane-1-carboxylate oxidase homolog 3-like [Helianthus annuus]
Unigene120618	1009.14	332.972	-1.59987	1.87607e-91	2.68399e-89	down	[R]	General function prediction only	Molecular Function: oxidoreductase activity, acting on paired donors, with incorporation or reduction of molecular oxygen, 2-oxoglutarate as one donor, and incorporation of one atom each of oxygen into both donors (GO:0016706);; Molecular Function: metal ion binding (GO:0046872);; Biological Process: oxidation-reduction process (GO:0055114);;	--	[QR]	--	2OG-Fe(II) oxygenase superfamily	1-aminocyclopropane-1-carboxylate oxidase homolog 6 OS=Arabidopsis thaliana OX=3702 GN=At1g04350 PE=2 SV=1	uncharacterized protein LOC110932635 [Helianthus annuus]
Unigene138721	431.815	115.48	-1.89921	3.12936e-55	1.92878e-53	down	[R]	General function prediction only	Molecular Function: oxidoreductase activity, acting on paired donors, with incorporation or reduction of molecular oxygen, 2-oxoglutarate as one donor, and incorporation of one atom each of oxygen into both donors (GO:0016706);; Molecular Function: metal ion binding (GO:0046872);; Biological Process: oxidation-reduction process (GO:0055114);;	--	[QR]	--	2OG-Fe(II) oxygenase superfamily	1-aminocyclopropane-1-carboxylate oxidase homolog 1 OS=Arabidopsis thaliana OX=3702 GN=At1g06620 PE=2 SV=1	putative oxoglutarate/iron-dependent dioxygenase [Helianthus annuus]
Unigene159564	7.66887	1.45251	-2.12605	0.0165409	0.0321256	down	--	--	--	--	[QR]	--	non-haem dioxygenase in morphine synthesis N-terminal	1-aminocyclopropane-1-carboxylate oxidase homolog 3 OS=Arabidopsis thaliana OX=3702 GN=At1g06650 PE=2 SV=1	hypothetical protein LSAT_3X121680 [Lactuca sativa]
Unigene197178	20.6745	4.39973	-2.14198	0.000183143	0.000545902	down	[R]	General function prediction only	--	--	[QR]	--	2OG-Fe(II) oxygenase superfamily	1-aminocyclopropane-1-carboxylate oxidase homolog 6 OS=Arabidopsis thaliana OX=3702 GN=At1g04350 PE=2 SV=1	1-aminocyclopropane-1-carboxylate oxidase homolog 1-like [Helianthus annuus]
Unigene173111	40.1479	6.66672	-2.50923	4.94699e-08	2.58127e-07	down	--	--	Molecular Function: oxidoreductase activity, acting on paired donors, with incorporation or reduction of molecular oxygen, 2-oxoglutarate as one donor, and incorporation of one atom each of oxygen into both donors (GO:0016706);; Biological Process: oxidation-reduction process (GO:0055114);;	--	[R]	General function prediction only	--	1-aminocyclopropane-1-carboxylate oxidase homolog 11 OS=Arabidopsis thaliana OX=3702 GN=At5g59530 PE=2 SV=1	1-aminocyclopropane-1-carboxylate oxidase homolog 1-like [Lactuca sativa]
Unigene187657	4185.29	658.562	-2.66759	0	0	down	--	--	Biological Process: ethylene biosynthetic process (GO:0009693);; Molecular Function: 1-aminocyclopropane-1-carboxylate oxidase activity (GO:0009815);; Biological Process: fruit ripening (GO:0009835);; Molecular Function: oxidoreductase activity, acting on paired donors, with incorporation or reduction of molecular oxygen, 2-oxoglutarate as one donor, and incorporation of one atom each of oxygen i…	K05933|1e-36|vvi:100256784|E1.14.17.4;EC:1.14.17.4|hypothetical protein LOC100256784; K05933 aminocyclopropanecarboxylate oxidase [EC:1.14.17.4]	[QR]	--	--	1-aminocyclopropane-1-carboxylate oxidase OS=Diospyros kaki OX=35925 GN=DK-ACO1 PE=2 SV=1	1-aminocyclopropane-1-carboxylate oxidase 3 [Helianthus annuus]
Unigene171625	311.953	43.7264	-2.82862	6.23898e-67	5.27132e-65	down	--	--	--	--	[QR]	--	--	1-aminocyclopropane-1-carboxylate oxidase homolog 3 OS=Arabidopsis thaliana OX=3702 GN=At1g06650 PE=2 SV=1	Non-heme dioxygenase N-terminal domain-containing protein [Cynara cardunculus var. scolymus]
Unigene142611	214.347	20.8638	-3.34549	7.10858e-52	3.95833e-50	down	--	--	--	--	[QR]	--	--	1-aminocyclopropane-1-carboxylate oxidase homolog 3 OS=Arabidopsis thaliana OX=3702 GN=At1g06650 PE=2 SV=1	Oxoglutarate/iron-dependent dioxygenase [Cynara cardunculus var. scolymus]
Unigene138630	6.88507	0.29132	-3.45844	0.00259664	0.00612528	down	--	--	--	--	[QR]	--	non-haem dioxygenase in morphine synthesis N-terminal	1-aminocyclopropane-1-carboxylate oxidase homolog OS=Solanum lycopersicum OX=4081 GN=ACO3 PE=2 SV=1	hypothetical protein LSAT_3X121680 [Lactuca sativa]
Unigene123288	135.222	9.96973	-3.72138	2.24007e-35	7.1877e-34	down	--	--	--	--	[QR]	--	2OG-Fe(II) oxygenase superfamily	1-aminocyclopropane-1-carboxylate oxidase homolog 3 OS=Arabidopsis thaliana OX=3702 GN=At1g06650 PE=2 SV=1	putative oxoglutarate/iron-dependent dioxygenase [Helianthus annuus]
Unigene174404	8.71966	0	-4.56643	7.74395e-05	0.000246729	down	--	--	Biological Process: ethylene biosynthetic process (GO:0009693);; Molecular Function: 1-aminocyclopropane-1-carboxylate oxidase activity (GO:0009815);; Biological Process: fruit ripening (GO:0009835);; Molecular Function: oxidoreductase activity, acting on paired donors, with incorporation or reduction of molecular oxygen, 2-oxoglutarate as one donor, and incorporation of one atom each of oxygen i…	K05933|4e-45|vvi:100232928|E1.14.17.4;EC:1.14.17.4|ACO1; 1-aminocyclopropane-1-carboxylic acid oxidase 1; K05933 aminocyclopropanecarboxylate oxidase [EC:1.14.17.4]	[QR]	--	non-haem dioxygenase in morphine synthesis N-terminal	1-aminocyclopropane-1-carboxylate oxidase OS=Prunus mume OX=102107 GN=ACO1 PE=2 SV=1	1-aminocyclopropane-1-carboxylate oxidase, partial [Prunus persica]
Unigene095367	59.1762	1.7579	-4.83618	1.28058e-16	1.57687e-15	down	--	--	Molecular Function: iron ion binding (GO:0005506);; Molecular Function: desacetoxyvindoline 4-hydroxylase activity (GO:0050590);; Biological Process: oxidation-reduction process (GO:0055114);;	--	[QR]	--	--	1-aminocyclopropane-1-carboxylate oxidase homolog 3 OS=Arabidopsis thaliana OX=3702 GN=At1g06650 PE=2 SV=1	hypothetical protein LSAT_3X121740 [Lactuca sativa]
Unigene181766	19.4906	0	-5.73789	7.77093e-08	3.94963e-07	down	[R]	General function prediction only	Biological Process: ethylene biosynthetic process (GO:0009693);; Molecular Function: 1-aminocyclopropane-1-carboxylate oxidase activity (GO:0009815);; Biological Process: fruit ripening (GO:0009835);; Molecular Function: oxidoreductase activity, acting on paired donors, with incorporation or reduction of molecular oxygen, 2-oxoglutarate as one donor, and incorporation of one atom each of oxygen i…	K05933|1e-154|pop:POPTR_573016|E1.14.17.4;EC:1.14.17.4|ACO3; 1-aminocyclopropane-1-carboxylate (EC:1.14.11.9); K05933 aminocyclopropanecarboxylate oxidase [EC:1.14.17.4]	[QR]	--	2OG-Fe(II) oxygenase superfamily	1-aminocyclopropane-1-carboxylate oxidase OS=Prunus mume OX=102107 GN=ACO1 PE=2 SV=1	1-aminocyclopropane-1-carboxylate oxidase [Prunus persica]
Unigene159946	20.4448	0	-5.81367	4.39912e-08	2.3112e-07	down	[R]	General function prediction only	--	--	[QR]	--	2OG-Fe(II) oxygenase superfamily	1-aminocyclopropane-1-carboxylate oxidase homolog 1 OS=Arabidopsis thaliana OX=3702 GN=At1g06620 PE=2 SV=1	1-aminocyclopropane-1-carboxylate oxidase homolog 1-like [Helianthus annuus]
Unigene173753	33.525	0	-6.46972	5.10367e-10	3.41761e-09	down	--	--	--	K05933|2e-08|vvi:100232928|E1.14.17.4;EC:1.14.17.4|ACO1; 1-aminocyclopropane-1-carboxylic acid oxidase 1; K05933 aminocyclopropanecarboxylate oxidase [EC:1.14.17.4]	[QR]	--	--	1-aminocyclopropane-1-carboxylate oxidase OS=Prunus mume OX=102107 GN=ACO1 PE=2 SV=1	1-aminocyclopropane-1-carboxylate oxidase, partial [Artemisia annua]
ETR
Unigene115740	8.38642	0.282239	-3.72365	0.000946644	0.00245325	down	[T]	Signal transduction mechanisms	Molecular Function: kinase activity (GO:0016301);; Biological Process: phosphorylation (GO:0016310);;	--	--	--	Histidine kinase-, DNA gyrase B-, and HSP90-like ATPase	Ethylene receptor 1 OS=Arabidopsis thaliana OX=3702 GN=ETR1 PE=1 SV=1	hypothetical protein PGTG_15390 [Puccinia graminis f. sp. tritici CRL 75-36-700-3]
Unigene193942	17.3689	2.6096	-2.55048	0.000262399	0.000759533	down	[T]	Signal transduction mechanisms	Biological Process: metabolic process (GO:0008152);; Biological Process: cellular process (GO:0009987);; Molecular Function: transferase activity (GO:0016740);; Biological Process: biological_process (GO:0044699);;	--	[T]	Signal transduction mechanisms	Histidine kinase-, DNA gyrase B-, and HSP90-like ATPase;; His Kinase A (phospho-acceptor) domain;; HAMP domain	Ethylene receptor 1 OS=Pelargonium hortorum OX=4031 GN=ETR1 PE=2 SV=1	uncharacterized protein LOC109794793, partial [Cajanus cajan]
Unigene194442	55.3684	233.242	2.06998	3.05302e-34	9.30649e-33	up	[T]	Signal transduction mechanisms	Molecular Function: phosphorelay sensor kinase activity (GO:0000155);; Cellular Component: endoplasmic reticulum membrane (GO:0005789);; Biological Process: ethylene-activated signaling pathway (GO:0009873);; Biological Process: peptidyl-histidine phosphorylation (GO:0018106);; Biological Process: signal transduction by protein phosphorylation (GO:0023014);;	K14509|0.0|vvi:100254638|ETR, ERS;EC:2.7.13.-|hypothetical protein LOC100254638; K14509 ethylene receptor [EC:2.7.13.-]	[T]	Signal transduction mechanisms	GAF domain	Ethylene receptor 2 OS=Arabidopsis thaliana OX=3702 GN=ETR2 PE=1 SV=2	CheY-like superfamily [Cynara cardunculus var. scolymus]
Unigene047822	105.599	411.98	1.95924	8.04339e-56	5.04533e-54	up	[T]	Signal transduction mechanisms	Molecular Function: phosphorelay sensor kinase activity (GO:0000155);; Cellular Component: endoplasmic reticulum membrane (GO:0005789);; Biological Process: ethylene-activated signaling pathway (GO:0009873);; Biological Process: peptidyl-histidine phosphorylation (GO:0018106);; Biological Process: signal transduction by protein phosphorylation (GO:0023014);;	K14509|0.0|vvi:100254638|ETR, ERS;EC:2.7.13.-|hypothetical protein LOC100254638; K14509 ethylene receptor [EC:2.7.13.-]	[T]	Signal transduction mechanisms	GAF domain	Ethylene receptor 2 OS=Arabidopsis thaliana OX=3702 GN=ETR2 PE=1 SV=2	ethylene receptor 2-like [Lactuca sativa]
Unigene132300	8.06836	1.12896	-2.42838	0.0109775	0.0223141	down	[T]	Signal transduction mechanisms	Molecular Function: transferase activity, transferring phosphorus-containing groups (GO:0016772);; Biological Process: cellular metabolic process (GO:0044237);; Biological Process: regulation of cellular process (GO:0050794);; Biological Process: response to stimulus (GO:0050896);;	--	[T]	Signal transduction mechanisms	Histidine kinase-, DNA gyrase B-, and HSP90-like ATPase;; Response regulator receiver domain	Ethylene receptor 2 OS=Pelargonium hortorum OX=4031 GN=ETR2 PE=2 SV=1	hypothetical protein AYL99_02585 [Fonsecaea erecta]
Unigene175262	20.8015	3.558	-2.44164	3.92872e-05	0.000131704	down	[T]	Signal transduction mechanisms	Molecular Function: transferase activity, transferring phosphorus-containing groups (GO:0016772);; Biological Process: heterocycle biosynthetic process (GO:0018130);; Biological Process: aromatic compound biosynthetic process (GO:0019438);; Biological Process: cellular nitrogen compound biosynthetic process (GO:0044271);; Biological Process: metabolic process (GO:0044710);; Biological Process: ce…	--	[K]	Transcription	4'-phosphopantetheinyl transferase superfamily;; Histidine kinase-, DNA gyrase B-, and HSP90-like ATPase;; Dienelactone hydrolase family	Ethylene receptor 2 OS=Pelargonium hortorum OX=4031 GN=ETR2 PE=2 SV=1	uncharacterized protein LOC109794793, partial [Cajanus cajan]
Unigene077426	597.374	251.814	-1.24547	4.76031e-38	1.68918e-36	down	[T]	Signal transduction mechanisms	Molecular Function: phosphorelay sensor kinase activity (GO:0000155);; Molecular Function: phosphorelay response regulator activity (GO:0000156);; Biological Process: response to molecule of bacterial origin (GO:0002237);; Molecular Function: ATP binding (GO:0005524);; Cellular Component: endoplasmic reticulum membrane (GO:0005789);; Biological Process: regulation of transcription, DNA-templated …	K14509|4e-18|pop:POPTR_829549|ETR, ERS;EC:2.7.13.-|ETR3; ethylene receptor 3; K14509 ethylene receptor [EC:2.7.13.-]	[T]	Signal transduction mechanisms	--	Ethylene receptor 2 OS=Solanum lycopersicum OX=4081 GN=ETR2 PE=2 SV=1	ethylene receptor 1 [Lactuca sativa]
Unigene156832	7.34114	0.864879	-2.61688	0.00798368	0.0168323	down	[T]	Signal transduction mechanisms	Biological Process: regulation of cellular process (GO:0050794);;	--	[A]	RNA processing and modification	Response regulator receiver domain;; Histidine kinase-, DNA gyrase B-, and HSP90-like ATPase	Ethylene receptor 2 OS=Solanum lycopersicum OX=4081 GN=ETR2 PE=2 SV=1	Blue-light-activated protein [Beauveria bassiana D1-5]
Unigene107103	6.94165	0.29132	-3.48366	0.00225127	0.00538633	down	[T]	Signal transduction mechanisms	Biological Process: regulation of cellular process (GO:0050794);; Biological Process: response to stimulus (GO:0050896);;	K14509|3e-30|ppp:PHYPADRAFT_173828|ETR, ERS;EC:2.7.13.-|ETR1; ETR1 ethylene receptor	[T]	Signal transduction mechanisms	Response regulator receiver domain;; Histidine kinase-, DNA gyrase B-, and HSP90-like ATPase	Ethylene receptor 2 OS=Solanum lycopersicum OX=4081 GN=ETR2 PE=2 SV=1	Virulence sensor protein BvgS [Beauveria bassiana D1-5]
Unigene098427	8.7376	0.564478	-3.27294	0.0012298	0.00311114	down	[T]	Signal transduction mechanisms	Molecular Function: transferase activity, transferring phosphorus-containing groups (GO:0016772);; Biological Process: cellular metabolic process (GO:0044237);;	--	[T]	Signal transduction mechanisms	His Kinase A (phospho-acceptor) domain;; Transcriptional regulatory protein, C terminal	Ethylene receptor OS=Malus domestica OX=3750 GN=ETR1 PE=2 SV=1	hypothetical protein OsI_00217 [Oryza sativa Indica Group]
Unigene117932	11.8894	2.03105	-2.31984	0.00318297	0.00737164	down	--	--	--	--	--	--	--	Ethylene receptor OS=Nicotiana tabacum OX=4097 GN=ETR1 PE=2 SV=1	ethylene receptor 1 [Lactuca sativa]
Unigene191992	5.18435	0	-3.67072	0.00373732	0.00849836	down	[T]	Signal transduction mechanisms	Molecular Function: transferase activity (GO:0016740);; Biological Process: regulation of cellular process (GO:0050794);;	--	[T]	Signal transduction mechanisms	Response regulator receiver domain;; Histidine kinase-, DNA gyrase B-, and HSP90-like ATPase;; Response regulator receiver domain	Ethylene receptor OS=Passiflora edulis OX=78168 GN=ETR1 PE=2 SV=1	PREDICTED: blue-light-activated protein-like, partial [Ziziphus jujuba]
ERS
Unigene086013	184.22	68.7136	-1.41714	7.12599e-17	8.92771e-16	down	[T]	Signal transduction mechanisms	Molecular Function: phosphorelay sensor kinase activity (GO:0000155);; Molecular Function: protein serine/threonine kinase activity (GO:0004674);; Molecular Function: ATP binding (GO:0005524);; Cellular Component: endoplasmic reticulum membrane (GO:0005789);; Biological Process: negative regulation of ethylene-activated signaling pathway (GO:0010105);; Cellular Component: integral component of me…	K14509|0.0|vvi:100241730|ETR, ERS;EC:2.7.13.-|hypothetical protein LOC100241730; K14509 ethylene receptor [EC:2.7.13.-]	[T]	Signal transduction mechanisms	Histidine kinase-, DNA gyrase B-, and HSP90-like ATPase;; His Kinase A (phospho-acceptor) domain;; GAF domain	Probable ethylene response sensor 1 OS=Oryza sativa subsp. japonica OX=39947 GN=ERS1 PE=2 SV=1	ethylene response sensor 1-like [Helianthus annuus]
Unigene131439	13.8819	2.03515	-2.56809	0.000368174	0.00103592	down	[T]	Signal transduction mechanisms	Biological Process: phosphorelay signal transduction system (GO:0000160);; Molecular Function: protein histidine kinase activity (GO:0004673);; Molecular Function: obsolete signal transducer activity (GO:0004871);; Molecular Function: signaling receptor activity (GO:0004872);; Molecular Function: binding (GO:0005488);; Cellular Component: membrane (GO:0016020);; Biological Process: phosphorylatio…	K14509|6e-25|vvi:100241730|ETR, ERS;EC:2.7.13.-|hypothetical protein LOC100241730; K14509 ethylene receptor [EC:2.7.13.-]	[T]	Signal transduction mechanisms	Histidine kinase-, DNA gyrase B-, and HSP90-like ATPase	Ethylene response sensor 1 OS=Arabidopsis thaliana OX=3702 GN=ERS1 PE=1 SV=1	ethylene response sensor 1-like [Helianthus annuus]
Unigene140234	16.4106	0	-5.49642	3.83671e-07	1.76882e-06	down	[T]	Signal transduction mechanisms	--	--	[W]	Extracellular structures	PAS fold;; His Kinase A (phospho-acceptor) domain;; PAS domain	Ethylene response sensor 1 OS=Arabidopsis thaliana OX=3702 GN=ERS1 PE=1 SV=1	PREDICTED: sensor protein GacS-like [Ziziphus jujuba]
EIN
Unigene175233	5.86463	32.041	2.37737	7.62821e-07	3.35926e-06	up	--	--	Molecular Function: DNA-binding transcription factor activity (GO:0003700);; Cellular Component: nucleus (GO:0005634);; Biological Process: regulation of transcription, DNA-templated (GO:0006355);;	K14514|4e-72|vvi:100250496|EIN3;EIN3|hypothetical protein LOC100250496; K14514 ethylene-insensitive protein 3	--	--	Ethylene insensitive 3	Protein ETHYLENE INSENSITIVE 3 OS=Arabidopsis thaliana OX=3702 GN=EIN3 PE=1 SV=1	protein ETHYLENE INSENSITIVE 3-like [Helianthus annuus]
Unigene073756	114.354	433.423	1.91796	2.25449e-57	1.48228e-55	up	--	--	Molecular Function: DNA-binding transcription factor activity (GO:0003700);; Cellular Component: nucleus (GO:0005634);; Biological Process: regulation of transcription, DNA-templated (GO:0006355);;	K14514|1e-151|vvi:100250496|EIN3;EIN3|hypothetical protein LOC100250496; K14514 ethylene-insensitive protein 3	--	--	Ethylene insensitive 3	Protein ETHYLENE INSENSITIVE 3 OS=Arabidopsis thaliana OX=3702 GN=EIN3 PE=1 SV=1	protein ETHYLENE INSENSITIVE 3-like [Helianthus annuus]
Unigene021971	406.371	1359.03	1.74099	2.10177e-97	3.38071e-95	up	--	--	Molecular Function: DNA-binding transcription factor activity (GO:0003700);; Cellular Component: nucleus (GO:0005634);; Biological Process: regulation of transcription, DNA-templated (GO:0006355);;	K14514|0.0|vvi:100250496|EIN3;EIN3|hypothetical protein LOC100250496; K14514 ethylene-insensitive protein 3	--	--	Ethylene insensitive 3	Protein ETHYLENE INSENSITIVE 3 OS=Arabidopsis thaliana OX=3702 GN=EIN3 PE=1 SV=1	ETHYLENE INSENSITIVE 3-like 1 protein [Helianthus annuus]
Unigene171427	89.1666	209.516	1.23092	6.36838e-15	6.87764e-14	up	--	--	Molecular Function: DNA-binding transcription factor activity (GO:0003700);; Cellular Component: nucleus (GO:0005634);; Biological Process: regulation of transcription, DNA-templated (GO:0006355);;	K14514|1e-62|vvi:100250496|EIN3;EIN3|hypothetical protein LOC100250496; K14514 ethylene-insensitive protein 3	--	--	Ethylene insensitive 3	Protein ETHYLENE INSENSITIVE 3 OS=Arabidopsis thaliana OX=3702 GN=EIN3 PE=1 SV=1	protein ETHYLENE INSENSITIVE 3-like [Helianthus annuus]
Unigene121611	371.105	860.896	1.21335	4.84649e-50	2.568e-48	up	--	--	Molecular Function: DNA-binding transcription factor activity (GO:0003700);; Cellular Component: nucleus (GO:0005634);; Biological Process: regulation of transcription, DNA-templated (GO:0006355);;	K14514|0.0|vvi:100250496|EIN3;EIN3|hypothetical protein LOC100250496; K14514 ethylene-insensitive protein 3	--	--	Ethylene insensitive 3	Protein ETHYLENE INSENSITIVE 3 OS=Arabidopsis thaliana OX=3702 GN=EIN3 PE=1 SV=1	ETHYLENE INSENSITIVE 3-like 1 protein [Helianthus annuus]
Unigene065789	300.508	637.482	1.08237	6.95241e-29	1.69439e-27	up	--	--	--	K14514|0.0|pop:POPTR_741753|EIN3;EIN3|EIN3B; ethylene-insensitive 3b; K14514 ethylene-insensitive protein 3	--	--	Ethylene insensitive 3	Protein ETHYLENE INSENSITIVE 3 OS=Arabidopsis thaliana OX=3702 GN=EIN3 PE=1 SV=1	protein ETHYLENE INSENSITIVE 3-like [Helianthus annuus]
EBF
Unigene024073	0	36.3613	6.31177	1.08496e-09	6.98552e-09	up	--	--	--	--	[R]	General function prediction only	--	EIN3-binding F-box protein 1 OS=Arabidopsis thaliana OX=3702 GN=EBF1 PE=1 SV=1	EIN3-binding F-box protein 2-like isoform X2 [Helianthus annuus]
Unigene062665	47.1551	263.169	2.47121	2.78856e-44	1.22354e-42	up	--	--	--	--	[R]	General function prediction only	Leucine Rich repeats (2 copies);; Leucine Rich repeat;; F-box domain	EIN3-binding F-box protein 2 OS=Arabidopsis thaliana OX=3702 GN=EBF2 PE=1 SV=1	EIN3-binding F-box protein 2-like isoform X1 [Helianthus annuus]
Unigene124388	1082.13	386.185	-1.48426	1.20263e-85	1.53198e-83	down	--	--	--	--	[R]	General function prediction only	Leucine Rich repeat;; Leucine Rich repeats (2 copies);; F-box domain	EIN3-binding F-box protein 2 OS=Arabidopsis thaliana OX=3702 GN=EBF2 PE=1 SV=1	EIN3-binding F-box protein 2-like isoform X1 [Helianthus annuus]
ERF1
Unigene185823	0	5.19017	3.454	0.00614952	0.013303	up	--	--	--	--	--	--	AP2 domain	Ethylene-responsive transcription factor 1 OS=Nicotiana tabacum OX=4097 GN=ERF1 PE=2 SV=1	AP2/ERF domain-containing protein [Cynara cardunculus var. scolymus]
Unigene015223	22.6002	46.2911	1.0182	0.00148086	0.0036819	up	--	--	Biological Process: transcription, DNA-templated (GO:0006351);;	--	--	--	AP2 domain	Ethylene-responsive transcription factor 1 OS=Nicotiana tabacum OX=4097 GN=ERF1 PE=2 SV=1	ethylene-responsive transcription factor 6-like [Lactuca sativa]
ERF2
Unigene041345	0	4.11659	3.05369	0.0198057	0.0376967	up	--	--	--	K14517|8e-26|ath:AT5G47220|ERF2;ERF2|ERF2; ERF2 (ETHYLENE RESPONSIVE ELEMENT BINDING FACTOR 2); DNA binding / transcription activator/ transcription factor; K14517 ethylene-responsive transcription factor 2	--	--	AP2 domain	Ethylene-responsive transcription factor 2 OS=Arabidopsis thaliana OX=3702 GN=ERF2 PE=2 SV=1	ORA [Artemisia annua]
Unigene201514	4.69238	37.2403	2.87788	6.83723e-09	3.9911e-08	up	--	--	Biological Process: transcription, DNA-templated (GO:0006351);; Biological Process: biological_process (GO:0044699);; Biological Process: regulation of cellular process (GO:0050794);; Biological Process: response to stimulus (GO:0050896);;	--	--	--	AP2 domain	Ethylene-responsive transcription factor 2 OS=Nicotiana sylvestris OX=4096 GN=ERF2 PE=2 SV=1	ethylene-responsive transcription factor 2-like [Lactuca sativa]
Unigene023456	21.2866	9.67342	-1.10698	0.0150963	0.0296018	down	--	--	Biological Process: transcription, DNA-templated (GO:0006351);;	--	--	--	AP2 domain	Ethylene-responsive transcription factor 2 OS=Arabidopsis thaliana OX=3702 GN=ERF2 PE=2 SV=1	ORA [Artemisia annua]
Unigene127084	19.6789	6.0791	-1.62743	0.00198907	0.0048145	down	--	--	Biological Process: transcription, DNA-templated (GO:0006351);;	--	--	--	AP2 domain	Ethylene-responsive transcription factor 2 OS=Arabidopsis thaliana OX=3702 GN=ERF2 PE=2 SV=1	ORA [Artemisia annua]
Unigene092904	53.62	7.23938	-2.82181	8.78754e-13	7.89917e-12	down	--	--	--	--	--	--	AP2 domain	Ethylene-responsive transcription factor 2 OS=Arabidopsis thaliana OX=3702 GN=ERF2 PE=2 SV=1	ethylene-responsive transcription factor ERF115-like [Helianthus annuus]

## Sheet: Table S9
Table S9 DEGs related to plant hormone bewteen US01 and CN25 in xylem
#id	baseMeanA	baseMeanB	log2(YZT2-CK-P/T1-14-CK-P)	pvalue	padj	regulated	COG_class	COG_class_annotation	GO_annotation	KEGG_annotation	KOG_class	KOG_class_annotation	Pfam_annotation	Swissprot_annotation	nr_annotation
Auxin
AUX
Unigene046595	726.01	1646.82	1.18006	5.20274e-47	2.24538e-45	up	--	--	Cellular Component: integral component of membrane (GO:0016021);;	K13946|2e-23|rcu:RCOM_0592670|AUX1, LAX;AUX1, LAX|amino acid transporter, putative; K13946 auxin influx carrier (AUX1 LAX family)	[E]	Amino acid transport and metabolism	--	Auxin transporter-like protein 2 OS=Medicago truncatula OX=3880 GN=LAX2 PE=2 SV=1	hypothetical protein LSAT_5X147581 [Lactuca sativa]
Unigene207810	81.5481	174.002	1.08533	3.83666e-08	3.60975e-07	up	--	--	Cellular Component: integral component of membrane (GO:0016021);;	K13946|1e-127|vvi:100267240|AUX1, LAX;AUX1, LAX|hypothetical protein LOC100267240; K13946 auxin influx carrier (AUX1 LAX family)	[E]	Amino acid transport and metabolism	Transmembrane amino acid transporter protein	Auxin transporter-like protein 1 OS=Medicago truncatula OX=3880 GN=LAX1 PE=2 SV=1	auxin transporter-like protein 2 [Lactuca sativa]
Unigene000896	122.638	260.746	1.0791	1.20102e-11	1.51891e-10	up	--	--	Cellular Component: integral component of membrane (GO:0016021);;	K13946|4e-67|rcu:RCOM_0592670|AUX1, LAX;AUX1, LAX|amino acid transporter, putative; K13946 auxin influx carrier (AUX1 LAX family)	[E]	Amino acid transport and metabolism	Transmembrane amino acid transporter protein;; Transmembrane amino acid transporter protein	Auxin transporter-like protein 1 OS=Medicago truncatula OX=3880 GN=LAX1 PE=2 SV=1	PREDICTED: auxin transporter-like protein 1 [Nicotiana sylvestris]
Unigene132318	1195.54	2418.51	1.01683	4.72961e-67	2.93856e-65	up	--	--	Cellular Component: integral component of membrane (GO:0016021);;	K13946|3e-82|pop:POPTR_653103|AUX1, LAX;AUX1, LAX|PtrAUX1; auxin influx carrier component; K13946 auxin influx carrier (AUX1 LAX family)	[E]	Amino acid transport and metabolism	Transmembrane amino acid transporter protein	Auxin transporter-like protein 2 OS=Medicago truncatula OX=3880 GN=LAX2 PE=2 SV=1	auxine transporter-like protein 2, partial [Medicago arabica]
TIR
Unigene115554	24.0466	80.2929	1.68608	1.55344e-07	1.36951e-06	up	--	--	Molecular Function: inositol hexakisphosphate binding (GO:0000822);; Molecular Function: ubiquitin-protein transferase activity (GO:0004842);; Cellular Component: nucleus (GO:0005634);; Biological Process: ubiquitin-dependent protein catabolic process (GO:0006511);; Biological Process: defense response (GO:0006952);; Biological Process: cell cycle (GO:0007049);; Biological Process: auxin-activate…	K14485|1e-125|ath:AT3G62980|TIR1;TIR1|TIR1; TIR1 (TRANSPORT INHIBITOR RESPONSE 1); auxin binding / protein binding / ubiquitin-protein ligase; K14485 transport inhibitor response 1	[R]	General function prediction only	Leucine Rich repeats (2 copies);; F-box-like;; F-box domain	Protein TRANSPORT INHIBITOR RESPONSE 1 OS=Arabidopsis thaliana OX=3702 GN=TIR1 PE=1 SV=2	protein TRANSPORT INHIBITOR RESPONSE 1-like [Helianthus annuus]
Unigene075856	88.6568	284.394	1.66556	1.38651e-21	2.93841e-20	up	--	--	Molecular Function: inositol hexakisphosphate binding (GO:0000822);; Molecular Function: ubiquitin-protein transferase activity (GO:0004842);; Cellular Component: nucleus (GO:0005634);; Biological Process: ubiquitin-dependent protein catabolic process (GO:0006511);; Biological Process: defense response (GO:0006952);; Biological Process: cell cycle (GO:0007049);; Biological Process: auxin-activate…	K14485|0.0|ath:AT3G62980|TIR1;TIR1|TIR1; TIR1 (TRANSPORT INHIBITOR RESPONSE 1); auxin binding / protein binding / ubiquitin-protein ligase; K14485 transport inhibitor response 1	[R]	General function prediction only	Leucine Rich repeats (2 copies);; F-box-like;; Leucine Rich repeat;; F-box domain	Protein TRANSPORT INHIBITOR RESPONSE 1 OS=Arabidopsis thaliana OX=3702 GN=TIR1 PE=1 SV=2	protein TRANSPORT INHIBITOR RESPONSE 1-like [Lactuca sativa]
Unigene067324	19.0356	56.2236	1.53606	4.30118e-05	0.000273372	up	--	--	Molecular Function: inositol hexakisphosphate binding (GO:0000822);; Molecular Function: ubiquitin-protein transferase activity (GO:0004842);; Cellular Component: nucleus (GO:0005634);; Biological Process: ubiquitin-dependent protein catabolic process (GO:0006511);; Biological Process: defense response (GO:0006952);; Biological Process: cell cycle (GO:0007049);; Biological Process: auxin-activate…	K14485|1e-124|rcu:RCOM_0556140|TIR1;TIR1|TRANSPORT INHIBITOR RESPONSE 1 protein, putative; K14485 transport inhibitor response 1	[R]	General function prediction only	F-box-like;; F-box domain	Protein TRANSPORT INHIBITOR RESPONSE 1 OS=Arabidopsis thaliana OX=3702 GN=TIR1 PE=1 SV=2	protein TRANSPORT INHIBITOR RESPONSE 1-like [Helianthus annuus]
Unigene074513	111.287	271.138	1.27533	3.51439e-15	5.5459e-14	up	--	--	Molecular Function: inositol hexakisphosphate binding (GO:0000822);; Molecular Function: ubiquitin-protein transferase activity (GO:0004842);; Cellular Component: nucleus (GO:0005634);; Biological Process: ubiquitin-dependent protein catabolic process (GO:0006511);; Biological Process: defense response (GO:0006952);; Biological Process: cell cycle (GO:0007049);; Biological Process: auxin-activate…	K14485|0.0|ath:AT3G62980|TIR1;TIR1|TIR1; TIR1 (TRANSPORT INHIBITOR RESPONSE 1); auxin binding / protein binding / ubiquitin-protein ligase; K14485 transport inhibitor response 1	[R]	General function prediction only	Leucine Rich repeats (2 copies)	Protein TRANSPORT INHIBITOR RESPONSE 1 OS=Arabidopsis thaliana OX=3702 GN=TIR1 PE=1 SV=2	protein TRANSPORT INHIBITOR RESPONSE 1-like [Helianthus annuus]
Unigene160342	570.262	270.567	-1.07412	2.62156e-24	6.1267e-23	down	--	--	Molecular Function: inositol hexakisphosphate binding (GO:0000822);; Molecular Function: ubiquitin-protein transferase activity (GO:0004842);; Cellular Component: nucleus (GO:0005634);; Biological Process: ubiquitin-dependent protein catabolic process (GO:0006511);; Biological Process: defense response (GO:0006952);; Biological Process: cell cycle (GO:0007049);; Biological Process: auxin-activate…	K14485|0.0|ath:AT3G62980|TIR1;TIR1|TIR1; TIR1 (TRANSPORT INHIBITOR RESPONSE 1); auxin binding / protein binding / ubiquitin-protein ligase; K14485 transport inhibitor response 1	[R]	General function prediction only	Leucine Rich repeats (2 copies);; F-box-like;; Leucine Rich repeat;; F-box domain	Protein TRANSPORT INHIBITOR RESPONSE 1 OS=Arabidopsis thaliana OX=3702 GN=TIR1 PE=1 SV=2	F-box domain, cyclin-like protein [Cynara cardunculus var. scolymus]
AUX/IAA
Unigene027732	10.3079	55.46	2.34285	2.98058e-08	2.83493e-07	up	--	--	Cellular Component: nucleus (GO:0005634);; Biological Process: regulation of transcription, DNA-templated (GO:0006355);; Biological Process: auxin-activated signaling pathway (GO:0009734);; Molecular Function: protein dimerization activity (GO:0046983);;	K14484|8e-24|vvi:100253148|IAA;IAA|hypothetical protein LOC100253148	--	--	--	Auxin-responsive protein IAA30 OS=Oryza sativa subsp. japonica OX=39947 GN=IAA30 PE=2 SV=1	auxin-responsive protein IAA27-like [Lactuca sativa]
Unigene009272	13.4692	35.1506	1.32088	0.00222237	0.00976196	up	--	--	Cellular Component: nucleus (GO:0005634);; Biological Process: regulation of transcription, DNA-templated (GO:0006355);; Biological Process: auxin-activated signaling pathway (GO:0009734);; Molecular Function: protein dimerization activity (GO:0046983);;	--	--	--	--	Auxin-responsive protein IAA8 OS=Arabidopsis thaliana OX=3702 GN=IAA8 PE=1 SV=1	Aux/IAA-ARF-dimerization, partial [Cynara cardunculus var. scolymus]
Unigene122811	57.358	27.7544	-1.01886	0.00404448	0.0164365	down	--	--	--	K14484|3e-10|ath:AT4G14550|IAA;IAA|IAA14; IAA14 (INDOLE-3-ACETIC ACID INDUCIBLE 14); protein binding / transcription factor/ transcription repressor	--	--	--	Auxin-responsive protein IAA14 OS=Arabidopsis thaliana OX=3702 GN=IAA14 PE=1 SV=2	auxin-responsive protein IAA8-like isoform X2 [Helianthus annuus]
Unigene159861	114.738	54.6393	-1.05974	4.76635e-06	3.49829e-05	down	--	--	Biological Process: cellular process (GO:0009987);; Biological Process: response to organic substance (GO:0010033);;	--	--	--	AUX/IAA family	Auxin-responsive protein IAA16 OS=Arabidopsis thaliana OX=3702 GN=IAA16 PE=1 SV=1	auxin-responsive protein IAA16-like [Lactuca sativa]
Unigene179365	204.393	94.4646	-1.10798	2.31245e-10	2.6475e-09	down	--	--	Cellular Component: nucleus (GO:0005634);; Biological Process: regulation of transcription, DNA-templated (GO:0006355);; Biological Process: auxin-activated signaling pathway (GO:0009734);; Molecular Function: protein dimerization activity (GO:0046983);;	K14484|1e-67|vvi:100254530|IAA;IAA|hypothetical protein LOC100254530	--	--	AUX/IAA family	Auxin-responsive protein IAA7 OS=Arabidopsis thaliana OX=3702 GN=IAA7 PE=1 SV=1	Auxin-responsive protein [Actinidia chinensis var. chinensis]
Unigene142629	462.309	205.416	-1.16698	4.51459e-22	9.73162e-21	down	--	--	Cellular Component: nucleus (GO:0005634);; Biological Process: regulation of transcription, DNA-templated (GO:0006355);; Biological Process: auxin-activated signaling pathway (GO:0009734);; Molecular Function: protein dimerization activity (GO:0046983);;	--	--	--	--	Auxin-responsive protein IAA3 OS=Arabidopsis thaliana OX=3702 GN=IAA3 PE=1 SV=1	auxin-induced protein 22D [Lactuca sativa]
Unigene022387	510.279	172.119	-1.56716	6.41013e-34	2.05639e-32	down	--	--	--	--	--	--	AUX/IAA family	Auxin-responsive protein IAA12 OS=Arabidopsis thaliana OX=3702 GN=IAA12 PE=1 SV=1	auxin-responsive protein IAA12-like [Lactuca sativa]
Unigene058173	165.883	52.2719	-1.64626	5.19054e-15	8.11555e-14	down	--	--	Cellular Component: nucleus (GO:0005634);; Biological Process: regulation of transcription, DNA-templated (GO:0006355);; Biological Process: auxin-activated signaling pathway (GO:0009734);; Molecular Function: protein dimerization activity (GO:0046983);;	K14484|1e-18|ath:AT1G04240|IAA;IAA|SHY2; SHY2 (SHORT HYPOCOTYL 2); transcription factor; K14484 auxin-responsive protein IAA	--	--	--	Auxin-responsive protein IAA3 OS=Arabidopsis thaliana OX=3702 GN=IAA3 PE=1 SV=1	hypothetical protein Ccrd_024984 [Cynara cardunculus var. scolymus]
Unigene055987	10.8824	1.68118	-2.2604	0.00518431	0.020352	down	--	--	Biological Process: cellular process (GO:0009987);;	--	--	--	AUX/IAA family	Auxin-responsive protein IAA17 OS=Arabidopsis thaliana OX=3702 GN=IAA17 PE=1 SV=2	Aux/IAA-ARF-dimerization [Cynara cardunculus var. scolymus]
Unigene178031	701.098	138.739	-2.33086	1.38947e-86	1.13902e-84	down	--	--	Biological Process: transcription, DNA-templated (GO:0006351);; Biological Process: regulation of cellular process (GO:0050794);;	K14484|1e-18|ath:AT1G51950|IAA;IAA|IAA18; IAA18 (INDOLE-3-ACETIC ACID INDUCIBLE 18); transcription factor; K14484 auxin-responsive protein IAA	--	--	--	Auxin-responsive protein IAA18 OS=Arabidopsis thaliana OX=3702 GN=IAA18 PE=1 SV=2	auxin-responsive protein IAA26-like isoform X1 [Lactuca sativa]
Unigene013572	31.0138	4.55092	-2.58507	3.34916e-06	2.51039e-05	down	--	--	--	--	--	--	AUX/IAA family	Auxin-responsive protein IAA29 OS=Arabidopsis thaliana OX=3702 GN=IAA29 PE=1 SV=2	Aux/IAA-ARF-dimerization [Cynara cardunculus var. scolymus]
Unigene031957	10714.1	1681.57	-2.67113	0	0	down	--	--	Cellular Component: nucleus (GO:0005634);; Biological Process: regulation of transcription, DNA-templated (GO:0006355);; Biological Process: auxin-activated signaling pathway (GO:0009734);; Molecular Function: protein dimerization activity (GO:0046983);;	K14484|2e-76|vvi:100266914|IAA;IAA|hypothetical protein LOC100266914	--	--	AUX/IAA family	Auxin-responsive protein IAA18 OS=Arabidopsis thaliana OX=3702 GN=IAA18 PE=1 SV=2	auxin-responsive protein IAA26-like isoform X1 [Helianthus annuus]
ARF
Unigene091974	5.17516	85.032	3.9133	7.81116e-18	1.39979e-16	up	--	--	Molecular Function: binding (GO:0005488);; Biological Process: transcription, DNA-templated (GO:0006351);; Biological Process: response to hormone (GO:0009725);; Biological Process: regulation of cellular process (GO:0050794);;	--	--	--	Auxin response factor	Auxin response factor 19 OS=Oryza sativa subsp. japonica OX=39947 GN=ARF19 PE=2 SV=2	Aux/IAA-ARF-dimerization [Cynara cardunculus var. scolymus]
Unigene171683	2.51148	41.8733	3.67271	7.37295e-10	8.10515e-09	up	--	--	Molecular Function: DNA binding (GO:0003677);; Cellular Component: nucleus (GO:0005634);; Biological Process: regulation of transcription, DNA-templated (GO:0006355);; Biological Process: auxin-activated signaling pathway (GO:0009734);; Molecular Function: protein dimerization activity (GO:0046983);;	--	--	--	B3 DNA binding domain	Auxin response factor 19 OS=Oryza sativa subsp. japonica OX=39947 GN=ARF19 PE=2 SV=2	auxin response factor 19-like [Lactuca sativa]
Unigene166996	8.7416	81.3287	3.07532	7.41138e-15	1.14735e-13	up	--	--	Biological Process: cellular process (GO:0009987);;	--	--	--	Auxin response factor	Auxin response factor 19 OS=Oryza sativa subsp. japonica OX=39947 GN=ARF19 PE=2 SV=2	Aux/IAA-ARF-dimerization [Cynara cardunculus var. scolymus]
Unigene049763	6.80239	62.0195	3.0555	3.96663e-12	5.18844e-11	up	--	--	Molecular Function: DNA binding (GO:0003677);; Cellular Component: nucleus (GO:0005634);; Biological Process: regulation of transcription, DNA-templated (GO:0006355);; Biological Process: auxin-activated signaling pathway (GO:0009734);; Molecular Function: protein dimerization activity (GO:0046983);;	--	--	--	B3 DNA binding domain	Auxin response factor 19 OS=Oryza sativa subsp. japonica OX=39947 GN=ARF19 PE=2 SV=2	auxin response factor 19-like [Lactuca sativa]
Unigene003045	10.8652	91.6457	2.97598	3.33869e-15	5.27599e-14	up	--	--	Molecular Function: DNA binding (GO:0003677);; Cellular Component: nucleus (GO:0005634);; Biological Process: regulation of transcription, DNA-templated (GO:0006355);; Biological Process: auxin-activated signaling pathway (GO:0009734);; Molecular Function: protein dimerization activity (GO:0046983);;	--	--	--	Auxin response factor;; B3 DNA binding domain	Auxin response factor 19 OS=Oryza sativa subsp. japonica OX=39947 GN=ARF19 PE=2 SV=2	auxin response factor 19-like [Lactuca sativa]
Unigene089359	77.2124	390.542	2.32418	1.13122e-49	5.14578e-48	up	--	--	--	--	--	--	--	Auxin response factor 19 OS=Oryza sativa subsp. japonica OX=39947 GN=ARF19 PE=2 SV=2	Aux/IAA-ARF-dimerization [Cynara cardunculus var. scolymus]
Unigene005010	2.2983	11.5071	1.99161	0.0105953	0.0374787	up	--	--	Molecular Function: DNA binding (GO:0003677);; Cellular Component: nucleus (GO:0005634);; Biological Process: regulation of transcription, DNA-templated (GO:0006355);; Biological Process: auxin-activated signaling pathway (GO:0009734);; Molecular Function: protein dimerization activity (GO:0046983);;	K14486|1e-104|pop:POPTR_652033|K14486, ARF;K14486, ARF|hypothetical protein; K14486 auxin response factor	--	--	--	Auxin response factor 5 OS=Arabidopsis thaliana OX=3702 GN=ARF5 PE=1 SV=3	auxin response factor 5-like [Helianthus annuus]
Unigene205004	12.0316	47.9547	1.92239	2.33857e-06	1.78681e-05	up	--	--	Molecular Function: binding (GO:0005488);; Biological Process: transcription, DNA-templated (GO:0006351);; Biological Process: response to hormone (GO:0009725);; Biological Process: cellular process (GO:0044763);; Biological Process: developmental process (GO:0044767);; Biological Process: regulation of cellular process (GO:0050794);;	--	--	--	Auxin response factor;; B3 DNA binding domain	Auxin response factor 4 OS=Arabidopsis thaliana OX=3702 GN=ARF4 PE=1 SV=1	auxin response factor 4-like [Helianthus annuus]
Unigene081452	4.85918	19.7475	1.85526	0.00204518	0.0090807	up	--	--	--	--	--	--	--	Auxin response factor 1 OS=Arabidopsis thaliana OX=3702 GN=ARF1 PE=1 SV=2	Aux/IAA-ARF-dimerization [Cynara cardunculus var. scolymus]
Unigene089548	33.7964	122.014	1.8262	1.48478e-11	1.86757e-10	up	--	--	Molecular Function: DNA binding (GO:0003677);; Cellular Component: nucleus (GO:0005634);; Biological Process: regulation of transcription, DNA-templated (GO:0006355);; Biological Process: auxin-activated signaling pathway (GO:0009734);; Molecular Function: protein dimerization activity (GO:0046983);;	--	--	--	AUX/IAA family	Auxin response factor 5 OS=Oryza sativa subsp. japonica OX=39947 GN=ARF5 PE=2 SV=2	auxin response factor 19-like isoform X2 [Helianthus annuus]
Unigene086716	235.301	836.364	1.82398	2.10682e-63	1.23589e-61	up	--	--	Biological Process: transcription, DNA-templated (GO:0006351);; Biological Process: pattern specification process (GO:0007389);; Biological Process: anatomical structure morphogenesis (GO:0009653);; Biological Process: response to auxin (GO:0009733);; Biological Process: flower development (GO:0009908);; Biological Process: cellular process (GO:0044763);; Biological Process: regulation of cellula…	K14486|1e-144|pop:POPTR_713904|K14486, ARF;K14486, ARF|hypothetical protein; K14486 auxin response factor	--	--	Auxin response factor;; B3 DNA binding domain	Auxin response factor 3 OS=Arabidopsis thaliana OX=3702 GN=ARF3 PE=1 SV=2	hypothetical protein LSAT_7X22140 [Lactuca sativa]
Unigene055078	32.6387	109.253	1.71734	9.88622e-10	1.07394e-08	up	--	--	Molecular Function: DNA binding (GO:0003677);; Cellular Component: nucleus (GO:0005634);; Biological Process: regulation of transcription, DNA-templated (GO:0006355);; Biological Process: auxin-activated signaling pathway (GO:0009734);;	--	--	--	B3 DNA binding domain	Auxin response factor 19 OS=Arabidopsis thaliana OX=3702 GN=ARF19 PE=1 SV=2	Aux/IAA-ARF-dimerization [Cynara cardunculus var. scolymus]
Unigene124019	773.837	2171.97	1.48736	7.1236e-94	6.45783e-92	up	--	--	Biological Process: multicellular organism development (GO:0007275);; Biological Process: cellular process (GO:0009987);; Biological Process: response to stimulus (GO:0050896);; Biological Process: biological regulation (GO:0065007);;	K14486|0.0|vvi:100245251|K14486, ARF;K14486, ARF|hypothetical protein LOC100245251; K14486 auxin response factor	--	--	Auxin response factor;; B3 DNA binding domain	Auxin response factor 3 OS=Arabidopsis thaliana OX=3702 GN=ARF3 PE=1 SV=2	putative auxin response factor 2 [Helianthus annuus]
Unigene022128	195.475	529.452	1.42822	9.88327e-30	2.80439e-28	up	--	--	--	--	--	--	AUX/IAA family;; Auxin response factor	Auxin response factor 7 OS=Arabidopsis thaliana OX=3702 GN=ARF7 PE=1 SV=2	auxin response factor 19-like isoform X2 [Helianthus annuus]
Unigene029327	14.8269	38.1021	1.31816	0.00113826	0.00541093	up	--	--	Molecular Function: binding (GO:0005488);; Biological Process: transcription, DNA-templated (GO:0006351);; Biological Process: response to hormone (GO:0009725);; Biological Process: regulation of cellular process (GO:0050794);;	K14486|2e-34|pop:POPTR_828321|K14486, ARF;K14486, ARF|hypothetical protein; K14486 auxin response factor	--	--	--	Auxin response factor 1 OS=Arabidopsis thaliana OX=3702 GN=ARF1 PE=1 SV=2	auxin response factor 1 [Sesamum indicum]
Unigene004893	885.377	2169.91	1.29023	9.46056e-93	8.39707e-91	up	--	--	Molecular Function: DNA binding (GO:0003677);; Cellular Component: nucleus (GO:0005634);; Biological Process: regulation of transcription, DNA-templated (GO:0006355);; Biological Process: auxin-activated signaling pathway (GO:0009734);; Molecular Function: protein dimerization activity (GO:0046983);;	--	--	--	Auxin response factor;; B3 DNA binding domain	Auxin response factor 18 OS=Oryza sativa subsp. japonica OX=39947 GN=ARF18 PE=2 SV=1	Aux/IAA-ARF-dimerization [Cynara cardunculus var. scolymus]
Unigene079977	79.6894	193.098	1.26309	6.15254e-11	7.36592e-10	up	--	--	--	--	--	--	B3 DNA binding domain	Auxin response factor 11 OS=Arabidopsis thaliana OX=3702 GN=ARF11 PE=2 SV=3	auxin response factor 18-like isoform X1 [Lactuca sativa]
Unigene111623	509.314	1193.67	1.22631	8.41434e-46	3.55906e-44	up	--	--	Molecular Function: DNA binding (GO:0003677);; Cellular Component: nucleus (GO:0005634);; Biological Process: regulation of transcription, DNA-templated (GO:0006355);; Biological Process: auxin-activated signaling pathway (GO:0009734);; Molecular Function: protein dimerization activity (GO:0046983);;	--	--	--	B3 DNA binding domain;; Auxin response factor;; AUX/IAA family;; Auxin response factor	Auxin response factor 11 OS=Arabidopsis thaliana OX=3702 GN=ARF11 PE=2 SV=3	auxin response factor 18-like isoform X1 [Lactuca sativa]
Unigene193028	232.12	524.112	1.17451	4.64426e-24	1.07527e-22	up	--	--	Molecular Function: DNA binding (GO:0003677);; Cellular Component: nucleus (GO:0005634);; Biological Process: regulation of transcription, DNA-templated (GO:0006355);; Biological Process: auxin-activated signaling pathway (GO:0009734);; Molecular Function: protein dimerization activity (GO:0046983);;	--	--	--	--	Auxin response factor 7 OS=Oryza sativa subsp. japonica OX=39947 GN=ARF7 PE=2 SV=1	auxin response factor 9-like isoform X2 [Lactuca sativa]
Unigene152042	416.201	931.539	1.15884	1.40249e-38	5.03902e-37	up	--	--	Molecular Function: DNA binding (GO:0003677);; Cellular Component: nucleus (GO:0005634);; Biological Process: regulation of transcription, DNA-templated (GO:0006355);; Biological Process: auxin-activated signaling pathway (GO:0009734);; Molecular Function: protein dimerization activity (GO:0046983);;	--	--	--	Auxin response factor;; B3 DNA binding domain	Auxin response factor 2A OS=Solanum lycopersicum OX=4081 GN=ARF2A PE=1 SV=1	auxin response factor 2A-like [Lactuca sativa]
Unigene032547	21.115	47.4917	1.13684	0.00156868	0.00719388	up	--	--	Biological Process: cellular process (GO:0009987);;	--	--	--	--	Auxin response factor 4 OS=Arabidopsis thaliana OX=3702 GN=ARF4 PE=1 SV=1	auxin response factor 4-like [Helianthus annuus]
Unigene028498	412.686	900.906	1.12242	2.3807e-32	7.2913e-31	up	--	--	Biological Process: multicellular organism development (GO:0007275);;	K14486|1e-53|vvi:100245251|K14486, ARF;K14486, ARF|hypothetical protein LOC100245251; K14486 auxin response factor	--	--	Auxin response factor	Auxin response factor 3 OS=Arabidopsis thaliana OX=3702 GN=ARF3 PE=1 SV=2	auxin response factor 3-like [Helianthus annuus]
Unigene123992	241.161	497.41	1.0413	5.52521e-20	1.09638e-18	up	--	--	--	--	--	--	AUX/IAA family;; Auxin response factor	Auxin response factor 7 OS=Arabidopsis thaliana OX=3702 GN=ARF7 PE=1 SV=2	auxin response factor 19-like isoform X1 [Helianthus annuus]
Unigene015035	31.7262	65.9138	1.03482	0.000521512	0.00268816	up	--	--	--	--	--	--	B3 DNA binding domain	Auxin response factor 11 OS=Arabidopsis thaliana OX=3702 GN=ARF11 PE=2 SV=3	auxin response factor 9-like isoform X2 [Lactuca sativa]
Unigene044243	924.43	1876.94	1.01903	3.59244e-43	1.4271e-41	up	--	--	--	--	--	--	AUX/IAA family;; Auxin response factor;; B3 DNA binding domain	Auxin response factor 9 OS=Arabidopsis thaliana OX=3702 GN=ARF9 PE=1 SV=1	auxin response factor 11-like isoform X2 [Helianthus annuus]
Unigene079292	30.1295	7.62635	-1.88415	0.000123612	0.00072542	down	--	--	Biological Process: multicellular organism development (GO:0007275);; Biological Process: cellular process (GO:0009987);; Biological Process: response to stimulus (GO:0050896);; Biological Process: biological regulation (GO:0065007);;	K14486|0.0|vvi:100245251|K14486, ARF;K14486, ARF|hypothetical protein LOC100245251; K14486 auxin response factor	--	--	Auxin response factor;; B3 DNA binding domain	Auxin response factor 3 OS=Arabidopsis thaliana OX=3702 GN=ARF3 PE=1 SV=2	auxin response factor 3-like [Helianthus annuus]
GH3
Unigene207487	6.15486	176.138	4.6326	1.87116e-33	5.93223e-32	up	--	--	--	K14487|0.0|rcu:RCOM_0032550|GH3;GH3|Indole-3-acetic acid-amido synthetase GH3.6, putative; K14487 auxin responsive GH3 gene family	--	--	GH3 auxin-responsive promoter	Indole-3-acetic acid-amido synthetase GH3.6 OS=Arabidopsis thaliana OX=3702 GN=GH3.6 PE=1 SV=1	indole-3-acetic acid-amido synthetase GH3.6-like [Lactuca sativa]
Unigene018393	1.2652	35.6823	4.28629	2.17264e-09	2.28984e-08	up	--	--	--	K14487|1e-146|rcu:RCOM_0032550|GH3;GH3|Indole-3-acetic acid-amido synthetase GH3.6, putative; K14487 auxin responsive GH3 gene family	--	--	GH3 auxin-responsive promoter	Indole-3-acetic acid-amido synthetase GH3.5 OS=Arabidopsis thaliana OX=3702 GN=GH3.5 PE=1 SV=1	indole-3-acetic acid-amido synthetase GH3.6-like [Lactuca sativa]
Unigene089648	4.19841	71.1367	3.87782	1.67789e-15	2.69114e-14	up	--	--	--	K14487|1e-134|rcu:RCOM_0032550|GH3;GH3|Indole-3-acetic acid-amido synthetase GH3.6, putative; K14487 auxin responsive GH3 gene family	--	--	GH3 auxin-responsive promoter	Indole-3-acetic acid-amido synthetase GH3.6 OS=Arabidopsis thaliana OX=3702 GN=GH3.6 PE=1 SV=1	putative GH3 family [Helianthus annuus]
Unigene116701	5.98478	23.4642	1.80643	0.00279317	0.0119228	up	--	--	--	K14487|0.0|rcu:RCOM_0032550|GH3;GH3|Indole-3-acetic acid-amido synthetase GH3.6, putative; K14487 auxin responsive GH3 gene family	--	--	GH3 auxin-responsive promoter	Indole-3-acetic acid-amido synthetase GH3.6 OS=Arabidopsis thaliana OX=3702 GN=GH3.6 PE=1 SV=1	indole-3-acetic acid-amido synthetase GH3.6-like [Lactuca sativa]
Unigene045931	4.66954	0	-3.03071	0.00543277	0.0212113	down	--	--	--	K14487|0.0|vvi:100250868|GH3;GH3|hypothetical protein LOC100250868; K14487 auxin responsive GH3 gene family	--	--	GH3 auxin-responsive promoter	Probable indole-3-acetic acid-amido synthetase GH3.1 OS=Arabidopsis thaliana OX=3702 GN=GH3.1 PE=2 SV=1	probable indole-3-acetic acid-amido synthetase GH3.1 [Helianthus annuus]
Unigene122986	53.5336	0.874666	-5.2391	1.56438e-14	2.37596e-13	down	--	--	Biological Process: metabolic process (GO:0008152);; Biological Process: response to auxin (GO:0009733);; Biological Process: response to brassinosteroid (GO:0009741);; Biological Process: response to cyclopentenone (GO:0010583);; Molecular Function: ligase activity (GO:0016874);;	K14487|0.0|rcu:RCOM_0174110|GH3;GH3|Indole-3-acetic acid-amido synthetase GH3.3, putative; K14487 auxin responsive GH3 gene family	--	--	GH3 auxin-responsive promoter	Probable indole-3-acetic acid-amido synthetase GH3.1 OS=Arabidopsis thaliana OX=3702 GN=GH3.1 PE=2 SV=1	GH3 auxin-responsive promoter [Cynara cardunculus var. scolymus]
Unigene064218	166.509	0.587731	-7.11959	1.13855e-26	2.89092e-25	down	--	--	Biological Process: metabolic process (GO:0008152);; Biological Process: response to auxin (GO:0009733);; Biological Process: response to brassinosteroid (GO:0009741);; Biological Process: response to cyclopentenone (GO:0010583);; Molecular Function: ligase activity (GO:0016874);;	K14487|0.0|rcu:RCOM_0174110|GH3;GH3|Indole-3-acetic acid-amido synthetase GH3.3, putative; K14487 auxin responsive GH3 gene family	--	--	GH3 auxin-responsive promoter	Probable indole-3-acetic acid-amido synthetase GH3.1 OS=Arabidopsis thaliana OX=3702 GN=GH3.1 PE=2 SV=1	probable indole-3-acetic acid-amido synthetase GH3.1 [Lactuca sativa]
SAUR
Unigene105075	0.843465	10.5355	2.8571	0.00172963	0.00783453	up	--	--	--	K14488|1e-52|vvi:100253355|SAUR;SAUR|similar to auxin-responsive family protein; K14488 SAUR family protein	--	--	Auxin responsive protein	Auxin-responsive protein SAUR50 OS=Arabidopsis thaliana OX=3702 GN=SAUR50 PE=1 SV=1	auxin-responsive protein SAUR50-like [Lactuca sativa]
Unigene087111	1.49562	14.9789	2.8165	0.000266227	0.00146042	up	--	--	--	K14488|3e-52|vvi:100253355|SAUR;SAUR|similar to auxin-responsive family protein; K14488 SAUR family protein	--	--	Auxin responsive protein	Auxin-responsive protein SAUR50 OS=Arabidopsis thaliana OX=3702 GN=SAUR50 PE=1 SV=1	auxin-responsive protein SAUR50-like [Lactuca sativa]
Unigene025126	15.1515	35.8737	1.21444	0.00443148	0.0177963	up	--	--	--	K14488|1e-43|pop:POPTR_818150|SAUR;SAUR|SAUR29; SAUR family protein; K14488 SAUR family protein	--	--	Auxin responsive protein	Auxin-responsive protein SAUR50 OS=Arabidopsis thaliana OX=3702 GN=SAUR50 PE=1 SV=1	auxin-responsive protein SAUR50-like [Helianthus annuus]
Unigene037001	39.2123	80.2902	1.02401	0.000495589	0.00256491	up	--	--	--	--	--	--	Auxin responsive protein	Auxin-responsive protein SAUR50 OS=Arabidopsis thaliana OX=3702 GN=SAUR50 PE=1 SV=1	hypothetical protein Ccrd_007515 [Cynara cardunculus var. scolymus]
Unigene179956	124.519	48.6419	-1.34701	1.55239e-07	1.3687e-06	down	--	--	--	K14488|2e-62|vvi:100242084|SAUR;SAUR|hypothetical protein LOC100242084; K14488 SAUR family protein	--	--	Auxin responsive protein	Auxin-responsive protein SAUR50 OS=Arabidopsis thaliana OX=3702 GN=SAUR50 PE=1 SV=1	auxin-induced protein 6B [Lactuca sativa]
Unigene086798	1551.48	554.053	-1.4857	5.69093e-92	5.00757e-90	down	[P]	Inorganic ion transport and metabolism	--	K14488|9e-48|pop:POPTR_569631|SAUR;SAUR|SAUR22; SAUR family protein; K14488 SAUR family protein	--	--	Auxin responsive protein	Auxin-responsive protein SAUR32 OS=Arabidopsis thaliana OX=3702 GN=SAUR32 PE=2 SV=1	putative SAUR-like auxin-responsive protein family [Helianthus annuus]
Unigene122778	608.049	214.745	-1.50056	9.22316e-38	3.24403e-36	down	--	--	--	K14488|5e-49|pop:POPTR_569631|SAUR;SAUR|SAUR22; SAUR family protein; K14488 SAUR family protein	--	--	Auxin responsive protein	Auxin-responsive protein SAUR32 OS=Arabidopsis thaliana OX=3702 GN=SAUR32 PE=2 SV=1	putative SAUR-like auxin-responsive protein family [Helianthus annuus]
Unigene046289	145.448	33.0309	-2.11159	2.21731e-17	3.89271e-16	down	--	--	--	K14488|3e-25|pop:POPTR_589468|SAUR;SAUR|SAUR66; SAUR family protein; K14488 SAUR family protein	--	--	Auxin responsive protein	Auxin-responsive protein SAUR32 OS=Arabidopsis thaliana OX=3702 GN=SAUR32 PE=2 SV=1	auxin-responsive protein SAUR50-like [Helianthus annuus]
Unigene131917	68.996	15.2366	-2.11327	1.99983e-09	2.11756e-08	down	--	--	--	K14488|4e-23|pop:POPTR_589468|SAUR;SAUR|SAUR66; SAUR family protein; K14488 SAUR family protein	--	--	Auxin responsive protein	Auxin-responsive protein SAUR32 OS=Arabidopsis thaliana OX=3702 GN=SAUR32 PE=2 SV=1	auxin-responsive protein SAUR50-like [Helianthus annuus]
Unigene184850	439.289	91.3496	-2.26155	2.15489e-48	9.54665e-47	down	--	--	--	K14488|3e-47|vvi:100255700|SAUR;SAUR|hypothetical protein LOC100255700; K14488 SAUR family protein	--	--	Auxin responsive protein	Auxin-responsive protein SAUR36 OS=Arabidopsis thaliana OX=3702 GN=SAUR36 PE=2 SV=1	auxin-responsive protein SAUR36-like [Lactuca sativa]
Unigene014223	644.662	116.042	-2.46558	6.54647e-92	5.75541e-90	down	--	--	--	K14488|1e-46|vvi:100255700|SAUR;SAUR|hypothetical protein LOC100255700; K14488 SAUR family protein	--	--	Auxin responsive protein	Auxin-responsive protein SAUR36 OS=Arabidopsis thaliana OX=3702 GN=SAUR36 PE=2 SV=1	auxin-responsive protein SAUR36-like [Lactuca sativa]
Unigene194631	7.23737	0.286935	-3.0664	0.00241207	0.0104908	down	--	--	--	K14488|6e-36|pop:POPTR_569631|SAUR;SAUR|SAUR22; SAUR family protein; K14488 SAUR family protein	--	--	Auxin responsive protein	Auxin-responsive protein SAUR32 OS=Arabidopsis thaliana OX=3702 GN=SAUR32 PE=2 SV=1	putative SAUR-like auxin-responsive protein family [Helianthus annuus]
Unigene092554	281.074	16.2622	-4.05596	9.37663e-58	4.99181e-56	down	--	--	--	--	--	--	Auxin responsive protein	Auxin-responsive protein SAUR66 OS=Arabidopsis thaliana OX=3702 GN=SAUR66 PE=2 SV=1	Auxin responsive SAUR protein [Cynara cardunculus var. scolymus]
Gibberellin
GA20
Unigene055446	4.13176	90.4575	4.22999	1.40587e-19	2.74849e-18	up	[R]	General function prediction only	Molecular Function: iron ion binding (GO:0005506);; Molecular Function: oxidoreductase activity, acting on paired donors, with incorporation or reduction of molecular oxygen, 2-oxoglutarate as one donor, and incorporation of one atom each of oxygen into both donors (GO:0016706);; Biological Process: oxidation-reduction process (GO:0055114);;	K05282|0.0|rcu:RCOM_1498120|E1.14.11.12;EC:1.14.11.12|gibberellin 20-oxidase, putative (EC:1.14.11.15); K05282 gibberellin 20-oxidase [EC:1.14.11.12]	[QR]	--	2OG-Fe(II) oxygenase superfamily;; non-haem dioxygenase in morphine synthesis N-terminal	Gibberellin 20 oxidase 2 OS=Arabidopsis thaliana OX=3702 GN=GA20OX2 PE=2 SV=1	gibberelin 20-oxidase [Lactuca sativa]
Unigene190547	12.0936	67.954	2.4253	2.51255e-09	2.63418e-08	up	[R]	General function prediction only	Molecular Function: iron ion binding (GO:0005506);; Molecular Function: oxidoreductase activity, acting on paired donors, with incorporation or reduction of molecular oxygen, 2-oxoglutarate as one donor, and incorporation of one atom each of oxygen into both donors (GO:0016706);; Biological Process: oxidation-reduction process (GO:0055114);;	K05282|0.0|rcu:RCOM_1498120|E1.14.11.12;EC:1.14.11.12|gibberellin 20-oxidase, putative (EC:1.14.11.15); K05282 gibberellin 20-oxidase [EC:1.14.11.12]	[QR]	--	2OG-Fe(II) oxygenase superfamily;; non-haem dioxygenase in morphine synthesis N-terminal	Gibberellin 20 oxidase 2 OS=Arabidopsis thaliana OX=3702 GN=GA20OX2 PE=2 SV=1	gibberelin 20-oxidase [Lactuca sativa]
Unigene181164	17.9066	71.9662	1.94972	9.91572e-09	9.87067e-08	up	[R]	General function prediction only	Molecular Function: iron ion binding (GO:0005506);; Molecular Function: gibberellin 3-beta-dioxygenase activity (GO:0016707);; Biological Process: oxidation-reduction process (GO:0055114);;	--	[QR]	--	2OG-Fe(II) oxygenase superfamily;; non-haem dioxygenase in morphine synthesis N-terminal	Gibberellin 20-oxidase-like protein OS=Arabidopsis thaliana OX=3702 GN=At5g51310 PE=2 SV=1	gibberellin 20-oxidase-like protein [Helianthus annuus]
Unigene080128	26.9533	103.1	1.90529	4.19245e-11	5.09529e-10	up	[R]	General function prediction only	Molecular Function: iron ion binding (GO:0005506);; Molecular Function: oxidoreductase activity, acting on paired donors, with incorporation or reduction of molecular oxygen, 2-oxoglutarate as one donor, and incorporation of one atom each of oxygen into both donors (GO:0016706);; Biological Process: oxidation-reduction process (GO:0055114);;	--	[QR]	--	2OG-Fe(II) oxygenase superfamily;; non-haem dioxygenase in morphine synthesis N-terminal	Gibberellin 20-oxidase-like protein OS=Arabidopsis thaliana OX=3702 GN=At5g51310 PE=2 SV=1	gibberellin 20-oxidase-like protein [Helianthus annuus]
Unigene151201	33.2666	71.8165	1.09548	0.000276858	0.0015136	up	[R]	General function prediction only	Molecular Function: iron ion binding (GO:0005506);; Molecular Function: oxidoreductase activity, acting on paired donors, with incorporation or reduction of molecular oxygen, 2-oxoglutarate as one donor, and incorporation of one atom each of oxygen into both donors (GO:0016706);; Biological Process: oxidation-reduction process (GO:0055114);;	--	[QR]	--	2OG-Fe(II) oxygenase superfamily;; non-haem dioxygenase in morphine synthesis N-terminal	Gibberellin 20-oxidase-like protein OS=Arabidopsis thaliana OX=3702 GN=At5g51310 PE=2 SV=1	gibberellin 20-oxidase-like protein [Helianthus annuus]
GA2
Unigene163796	143.817	43.7178	-1.69256	2.71584e-13	3.83496e-12	down	[Q]	Secondary metabolites biosynthesis, transport and catabolism	Molecular Function: monooxygenase activity (GO:0004497);; Molecular Function: iron ion binding (GO:0005506);; Molecular Function: oxidoreductase activity, acting on paired donors, with incorporation or reduction of molecular oxygen (GO:0016705);; Molecular Function: heme binding (GO:0020037);; Biological Process: oxidation-reduction process (GO:0055114);;	K04122|0.0|rcu:RCOM_1592560|GA3, CYP701;EC:1.14.13.78|ent-kaurene oxidase, putative (EC:1.14.13.78); K04122 ent-kaurene oxidase [EC:1.14.13.78]	[Q]	Secondary metabolites biosynthesis, transport and catabolism	Cytochrome P450	Ent-kaurene oxidase, chloroplastic OS=Arabidopsis thaliana OX=3702 GN=KO PE=1 SV=2	ent-kaurene oxidase CYP701A5 [Stevia rebaudiana]
GA20X
Unigene178858	10.5618	61.4572	2.45629	3.89472e-10	4.38027e-09	up	[R]	General function prediction only	Molecular Function: gibberellin 3-beta-dioxygenase activity (GO:0016707);; Molecular Function: metal ion binding (GO:0046872);; Biological Process: oxidation-reduction process (GO:0055114);;	--	[QR]	--	2OG-Fe(II) oxygenase superfamily;; non-haem dioxygenase in morphine synthesis N-terminal	Gibberellin 2-beta-dioxygenase 8 OS=Arabidopsis thaliana OX=3702 GN=GA2OX8 PE=1 SV=2	gibberellin 2-beta-dioxygenase 8-like [Helianthus annuus]
Unigene024847	11.8443	62.2258	2.32312	2.9577e-09	3.08281e-08	up	[R]	General function prediction only	Molecular Function: gibberellin 3-beta-dioxygenase activity (GO:0016707);; Molecular Function: metal ion binding (GO:0046872);; Biological Process: oxidation-reduction process (GO:0055114);;	--	[QR]	--	2OG-Fe(II) oxygenase superfamily;; non-haem dioxygenase in morphine synthesis N-terminal	Gibberellin 2-beta-dioxygenase 8 OS=Arabidopsis thaliana OX=3702 GN=GA2OX8 PE=1 SV=2	gibberellin 2-beta-dioxygenase 8-like [Helianthus annuus]
Unigene024016	36.6998	6.46321	-2.36279	4.71692e-06	3.46575e-05	down	--	--	Biological Process: gibberellin metabolic process (GO:0009685);; Molecular Function: gibberellin 2-beta-dioxygenase activity (GO:0045543);; Molecular Function: metal ion binding (GO:0046872);;	K04125|1e-141|vvi:100248676|E1.14.11.13;EC:1.14.11.13|hypothetical protein LOC100248676	[QR]	--	2OG-Fe(II) oxygenase superfamily;; non-haem dioxygenase in morphine synthesis N-terminal	Gibberellin 2-beta-dioxygenase 2 OS=Pisum sativum OX=3888 GN=GA2OX2 PE=2 SV=1	gibberellin 2-beta-dioxygenase 2 [Helianthus annuus]
Unigene098831	7.47346	0.573871	-2.66347	0.00611509	0.0234803	down	[R]	General function prediction only	Molecular Function: iron ion binding (GO:0005506);; Molecular Function: gibberellin 2-beta-dioxygenase activity (GO:0045543);; Biological Process: oxidation-reduction process (GO:0055114);;	K04125|1e-164|pop:POPTR_822902|E1.14.11.13;EC:1.14.11.13|GA2ox6; gibberellin 2-oxidase; K04125 gibberellin 2-oxidase [EC:1.14.11.13]	[QR]	--	2OG-Fe(II) oxygenase superfamily;; non-haem dioxygenase in morphine synthesis N-terminal	Gibberellin 2-beta-dioxygenase 1 OS=Pisum sativum OX=3888 GN=GA2OX1 PE=1 SV=1	gibberellin 2-beta-dioxygenase 1-like [Lactuca sativa]
Unigene052664	155.234	16.8642	-3.15046	6.3963e-31	1.87662e-29	down	[R]	General function prediction only	Molecular Function: iron ion binding (GO:0005506);; Molecular Function: gibberellin 2-beta-dioxygenase activity (GO:0045543);; Biological Process: oxidation-reduction process (GO:0055114);;	K04125|1e-113|pop:POPTR_822902|E1.14.11.13;EC:1.14.11.13|GA2ox6; gibberellin 2-oxidase; K04125 gibberellin 2-oxidase [EC:1.14.11.13]	[QR]	--	non-haem dioxygenase in morphine synthesis N-terminal;; 2OG-Fe(II) oxygenase superfamily;; 2OG-Fe(II) oxygenase superfamily	Gibberellin 2-beta-dioxygenase 1 OS=Pisum sativum OX=3888 GN=GA2OX1 PE=1 SV=1	putative oxoglutarate/iron-dependent dioxygenase [Helianthus annuus]
Unigene187831	32.6685	2.76039	-3.27845	1.42323e-08	1.39617e-07	down	--	--	Biological Process: gibberellin metabolic process (GO:0009685);; Molecular Function: gibberellin 2-beta-dioxygenase activity (GO:0045543);; Molecular Function: metal ion binding (GO:0046872);;	K04125|1e-142|vvi:100248676|E1.14.11.13;EC:1.14.11.13|hypothetical protein LOC100248676	[QR]	--	2OG-Fe(II) oxygenase superfamily;; non-haem dioxygenase in morphine synthesis N-terminal	Gibberellin 2-beta-dioxygenase 2 OS=Pisum sativum OX=3888 GN=GA2OX2 PE=2 SV=1	gibberellin 2-beta-dioxygenase 2 [Helianthus annuus]
Unigene203556	317.704	28.1526	-3.4558	1.15283e-60	6.49353e-59	down	[R]	General function prediction only	Molecular Function: iron ion binding (GO:0005506);; Molecular Function: gibberellin 2-beta-dioxygenase activity (GO:0045543);; Biological Process: oxidation-reduction process (GO:0055114);;	K04125|1e-112|pop:POPTR_822902|E1.14.11.13;EC:1.14.11.13|GA2ox6; gibberellin 2-oxidase; K04125 gibberellin 2-oxidase [EC:1.14.11.13]	[QR]	--	non-haem dioxygenase in morphine synthesis N-terminal;; 2OG-Fe(II) oxygenase superfamily;; 2OG-Fe(II) oxygenase superfamily	Gibberellin 2-beta-dioxygenase 1 OS=Pisum sativum OX=3888 GN=GA2OX1 PE=1 SV=1	putative oxoglutarate/iron-dependent dioxygenase [Helianthus annuus]
Unigene087393	9.8344	0	-4.19631	3.90338e-05	0.00024999	down	[R]	General function prediction only	Molecular Function: iron ion binding (GO:0005506);; Molecular Function: gibberellin 2-beta-dioxygenase activity (GO:0045543);; Biological Process: oxidation-reduction process (GO:0055114);;	K04125|1e-164|pop:POPTR_822902|E1.14.11.13;EC:1.14.11.13|GA2ox6; gibberellin 2-oxidase; K04125 gibberellin 2-oxidase [EC:1.14.11.13]	[QR]	--	2OG-Fe(II) oxygenase superfamily;; non-haem dioxygenase in morphine synthesis N-terminal	Gibberellin 2-beta-dioxygenase 1 OS=Pisum sativum OX=3888 GN=GA2OX1 PE=1 SV=1	gibberellin 2-beta-dioxygenase 1-like [Lactuca sativa]
Unigene015207	80.5747	0.861189	-5.81835	6.01655e-19	1.14015e-17	down	[R]	General function prediction only	Molecular Function: oxidoreductase activity, acting on paired donors, with incorporation or reduction of molecular oxygen, 2-oxoglutarate as one donor, and incorporation of one atom each of oxygen into both donors (GO:0016706);; Molecular Function: metal ion binding (GO:0046872);; Biological Process: oxidation-reduction process (GO:0055114);;	K04125|1e-158|vvi:100245189|E1.14.11.13;EC:1.14.11.13|hypothetical protein LOC100245189	[QR]	--	2OG-Fe(II) oxygenase superfamily;; non-haem dioxygenase in morphine synthesis N-terminal	Gibberellin 2-beta-dioxygenase 8 OS=Arabidopsis thaliana OX=3702 GN=GA2OX8 PE=1 SV=2	gibberellin 2-beta-dioxygenase 8 [Lactuca sativa]
Unigene189472	80.2093	0	-7.00202	2.24158e-16	3.7505e-15	down	[R]	General function prediction only	Molecular Function: oxidoreductase activity, acting on paired donors, with incorporation or reduction of molecular oxygen, 2-oxoglutarate as one donor, and incorporation of one atom each of oxygen into both donors (GO:0016706);; Molecular Function: metal ion binding (GO:0046872);; Biological Process: oxidation-reduction process (GO:0055114);;	K04125|1e-118|vvi:100245189|E1.14.11.13;EC:1.14.11.13|hypothetical protein LOC100245189	[QR]	--	2OG-Fe(II) oxygenase superfamily;; non-haem dioxygenase in morphine synthesis N-terminal	Gibberellin 2-beta-dioxygenase 8 OS=Arabidopsis thaliana OX=3702 GN=GA2OX8 PE=1 SV=2	gibberellin 2-beta-dioxygenase 8 [Lactuca sativa]
GID
Unigene134568	0.77682	10.262	2.85151	0.00181575	0.00817098	up	--	--	Biological Process: metabolic process (GO:0008152);; Molecular Function: carboxylic ester hydrolase activity (GO:0052689);;	--	[V]	Defense mechanisms	--	Gibberellin receptor GID1 OS=Oryza sativa subsp. japonica OX=39947 GN=GID1 PE=1 SV=1	hypothetical protein Ccrd_003508 [Cynara cardunculus var. scolymus]
Unigene089662	166.15	366.705	1.13965	9.08983e-21	1.46037e-19	up	--	--	--	K14495|4e-64|rcu:RCOM_1588720|GID2, SLY1;GID2, SLY1|F-box protein GID2, putative; K14495 F-box protein GID2	--	--	F-box domain;; F-box-like	F-box protein GID2 OS=Arabidopsis thaliana OX=3702 GN=GID2 PE=1 SV=1	F-box domain, cyclin-like protein [Cynara cardunculus var. scolymus]
Unigene002580	1085.27	270.024	-2.00451	4.91646e-108	5.21294e-106	down	--	--	Biological Process: MAPK cascade (GO:0000165);; Biological Process: response to superoxide (GO:0000303);; Cellular Component: nucleus (GO:0005634);; Biological Process: protein targeting to membrane (GO:0006612);; Biological Process: response to cold (GO:0009409);; Biological Process: response to water deprivation (GO:0009414);; Biological Process: response to auxin (GO:0009733);; Biological Proc…	K14493|0.0|vvi:100249385|GID1;EC:3.-.-.-|hypothetical protein LOC100249385; K14493 gibberellin receptor GID1 [EC:3.-.-.-]	[V]	Defense mechanisms	alpha/beta hydrolase fold;; Carboxylesterase family	Gibberellin receptor GID1B OS=Arabidopsis thaliana OX=3702 GN=GID1B PE=1 SV=1	Alpha/beta hydrolase fold-3 [Cynara cardunculus var. scolymus]
Unigene172148	988.033	231.266	-2.0928	1.41344e-108	1.50809e-106	down	--	--	Biological Process: MAPK cascade (GO:0000165);; Biological Process: response to superoxide (GO:0000303);; Cellular Component: nucleus (GO:0005634);; Biological Process: protein targeting to membrane (GO:0006612);; Biological Process: response to cold (GO:0009409);; Biological Process: response to water deprivation (GO:0009414);; Biological Process: response to auxin (GO:0009733);; Biological Proc…	K14493|0.0|vvi:100249385|GID1;EC:3.-.-.-|hypothetical protein LOC100249385; K14493 gibberellin receptor GID1 [EC:3.-.-.-]	[V]	Defense mechanisms	alpha/beta hydrolase fold;; Carboxylesterase family	Gibberellin receptor GID1B OS=Arabidopsis thaliana OX=3702 GN=GID1B PE=1 SV=1	Alpha/beta hydrolase fold-3 [Cynara cardunculus var. scolymus]
DELLA
Unigene172220	193.294	432.411	1.1539	4.54456e-19	8.67656e-18	up	--	--	Molecular Function: transcription factor activity, transcription factor binding (GO:0000989);; Cellular Component: nucleus (GO:0005634);; Biological Process: regulation of transcription, DNA-templated (GO:0006355);;	K14494|0.0|vvi:100232937|DELLA;DELLA|VvGAI1; GAI1; K14494 DELLA protein	--	--	GRAS domain family;; Transcriptional regulator DELLA protein N terminal	DELLA protein GAI1 OS=Vitis vinifera OX=29760 GN=GAI1 PE=2 SV=1	DELLA protein GAI1-like [Lactuca sativa]
Unigene040853	349.53	713.401	1.02493	9.11418e-26	2.24267e-24	up	--	--	Molecular Function: transcription factor activity, transcription factor binding (GO:0000989);; Cellular Component: nucleus (GO:0005634);; Biological Process: regulation of transcription, DNA-templated (GO:0006355);;	K14494|0.0|vvi:100232937|DELLA;DELLA|VvGAI1; GAI1; K14494 DELLA protein	--	--	GRAS domain family;; Transcriptional regulator DELLA protein N terminal	DELLA protein GAI1 OS=Vitis vinifera OX=29760 GN=GAI1 PE=2 SV=1	DELLA protein GAI1-like [Lactuca sativa]
Unigene078092	98.1441	31.0645	-1.63893	6.24249e-09	6.32096e-08	down	--	--	--	--	--	--	GRAS domain family	DELLA protein GAI1 OS=Vitis vinifera OX=29760 GN=GAI1 PE=2 SV=1	DELLA protein RGL1-like [Helianthus annuus]
Unigene006083	44.156	12.4791	-1.76726	5.07404e-05	0.000318793	down	--	--	--	--	--	--	GRAS domain family	DELLA protein RGL1 OS=Arabidopsis thaliana OX=3702 GN=RGL1 PE=1 SV=1	DELLA protein RGL1-like [Helianthus annuus]
Unigene195808	25.8363	5.05664	-2.20201	4.40226e-05	0.000279308	down	--	--	--	--	--	--	GRAS domain family	DELLA protein RGL1 OS=Arabidopsis thaliana OX=3702 GN=RGL1 PE=1 SV=1	DELLA protein RGL1-like [Helianthus annuus]
TFs
Unigene004858	278.171	110.165	-1.32668	1.32864e-14	2.02697e-13	down	--	--	Molecular Function: double-stranded DNA binding (GO:0003690);; Molecular Function: DNA-binding transcription factor activity (GO:0003700);; Cellular Component: nucleus (GO:0005634);; Biological Process: mRNA export from nucleus (GO:0006406);; Biological Process: positive regulation of cell proliferation (GO:0008284);; Biological Process: red, far-red light phototransduction (GO:0009585);; Biologi…	--	[K]	Transcription	bZIP transcription factor;; Basic region leucine zipper	Transcription factor HY5 OS=Arabidopsis thaliana OX=3702 GN=HY5 PE=1 SV=1	transcription factor HY5-like [Lactuca sativa]
Unigene182713	159.389	56.7434	-1.47648	9.29123e-13	1.26873e-11	down	--	--	Molecular Function: double-stranded DNA binding (GO:0003690);; Molecular Function: DNA-binding transcription factor activity (GO:0003700);; Cellular Component: nucleus (GO:0005634);; Biological Process: mRNA export from nucleus (GO:0006406);; Biological Process: positive regulation of cell proliferation (GO:0008284);; Biological Process: red, far-red light phototransduction (GO:0009585);; Biologi…	--	[K]	Transcription	bZIP transcription factor;; Basic region leucine zipper	Transcription factor HY5 OS=Arabidopsis thaliana OX=3702 GN=HY5 PE=1 SV=1	transcription factor HY5-like [Lactuca sativa]
Unigene059520	20.9065	4.82399	-1.96398	0.000840698	0.00412794	down	--	--	Molecular Function: DNA-binding transcription factor activity (GO:0003700);; Cellular Component: nucleus (GO:0005634);; Biological Process: regulation of transcription, DNA-templated (GO:0006355);; Biological Process: mRNA transcription (GO:0009299);; Biological Process: response to cytokinin (GO:0009735);; Biological Process: gibberellic acid mediated signaling pathway (GO:0009740);; Biological …	--	--	--	--	Transcription factor HBI1 OS=Arabidopsis thaliana OX=3702 GN=HBI1 PE=1 SV=3	transcription factor BEE 2-like [Lactuca sativa]
Unigene052332	40.5488	111.492	1.4458	2.48812e-08	2.38614e-07	up	--	--	Biological Process: response to abiotic stimulus (GO:0009628);; Biological Process: cellular process (GO:0009987);; Biological Process: biological_process (GO:0044699);; Biological Process: regulation of biological process (GO:0050789);;	K12126|7e-95|vvi:100247781|PIF3;PIF3|hypothetical protein LOC100247781	--	--	Helix-loop-helix DNA-binding domain	Transcription factor PIF3 OS=Arabidopsis thaliana OX=3702 GN=PIF3 PE=1 SV=1	Basic helix-loop-helix leucine zipper transcription factor [Cynara cardunculus var. scolymus]
ABA
ABA	Zeaxanthin epoxidase
Unigene148814	6.18072	54.5146	2.95721	2.27855e-10	2.60957e-09	up	[HC]	--	Cellular Component: chloroplast (GO:0009507);; Molecular Function: zeaxanthin epoxidase [overall] activity (GO:0009540);; Biological Process: abscisic acid biosynthetic process (GO:0009688);; Cellular Component: membrane (GO:0016020);; Molecular Function: zeaxanthin epoxidase activity (GO:0052662);; Molecular Function: antheraxanthin epoxidase activity (GO:0052663);; Biological Process: oxidation…	K09838|1e-158|pop:POPTR_764537|ZEP, ABA1;EC:1.14.15.21|hypothetical protein; K09838 zeaxanthin epoxidase [EC:1.14.13.90]	[CR]	--	FAD binding domain;; Pyridine nucleotide-disulphide oxidoreductase;; NAD(P)-binding Rossmann-like domain;; FAD binding domain	Zeaxanthin epoxidase, chloroplastic OS=Nicotiana plumbaginifolia OX=4092 GN=ABA2 PE=1 SV=1	zeaxanthin epoxidase [Chrysanthemum boreale]
Unigene050107	21.5759	52.7926	1.24793	0.000376777	0.00200301	up	--	--	Cellular Component: chloroplast (GO:0009507);; Molecular Function: zeaxanthin epoxidase [overall] activity (GO:0009540);; Biological Process: abscisic acid biosynthetic process (GO:0009688);; Cellular Component: membrane (GO:0016020);; Molecular Function: zeaxanthin epoxidase activity (GO:0052662);; Molecular Function: antheraxanthin epoxidase activity (GO:0052663);; Biological Process: oxidation…	K09838|1e-55|pop:POPTR_764537|ZEP, ABA1;EC:1.14.15.21|hypothetical protein; K09838 zeaxanthin epoxidase [EC:1.14.13.90]	[CR]	--	--	Zeaxanthin epoxidase, chloroplastic OS=Prunus armeniaca OX=36596 PE=2 SV=1	zeaxanthin epoxidase, chloroplastic [Lactuca sativa]
Unigene199179	20.256	41.7649	1.01865	0.00747432	0.0278784	up	--	--	Cellular Component: chloroplast (GO:0009507);; Molecular Function: zeaxanthin epoxidase [overall] activity (GO:0009540);; Biological Process: abscisic acid biosynthetic process (GO:0009688);; Cellular Component: membrane (GO:0016020);; Molecular Function: zeaxanthin epoxidase activity (GO:0052662);; Molecular Function: antheraxanthin epoxidase activity (GO:0052663);; Biological Process: oxidation…	K09838|1e-33|vvi:100232944|ZEP, ABA1;EC:1.14.15.21|ZEP; zeaxanthin epoxidase; K09838 zeaxanthin epoxidase [EC:1.14.13.90]	[CR]	--	--	Zeaxanthin epoxidase, chloroplastic OS=Solanum lycopersicum OX=4081 PE=2 SV=1	PREDICTED: zeaxanthin epoxidase, chloroplastic-like [Brassica rapa]
Unigene001267	31.023	111.681	1.81277	1.39633e-11	1.75848e-10	up	[HC]	--	Biological Process: response to heat (GO:0009408);; Biological Process: response to water deprivation (GO:0009414);; Cellular Component: chloroplast thylakoid membrane (GO:0009535);; Molecular Function: zeaxanthin epoxidase [overall] activity (GO:0009540);; Biological Process: abscisic acid biosynthetic process (GO:0009688);; Biological Process: sugar mediated signaling pathway (GO:0010182);; Bio…	K09838|0.0|rcu:RCOM_1408430|ZEP, ABA1;EC:1.14.15.21|zeaxanthin epoxidase, putative (EC:1.14.13.90); K09838 zeaxanthin epoxidase [EC:1.14.13.90]	[CR]	--	FAD binding domain;; Pyridine nucleotide-disulphide oxidoreductase;; NAD(P)-binding Rossmann-like domain;; FAD binding domain	Zeaxanthin epoxidase, chloroplastic OS=Nicotiana plumbaginifolia OX=4092 GN=ABA2 PE=1 SV=1	zeaxanthin epoxidase [Chrysanthemum boreale]
NCED	9-cis-epoxycarotenoid dioxygenase
Unigene200244	112.649	39.2488	-1.5016	8.08668e-10	8.85918e-09	down	[Q]	Secondary metabolites biosynthesis, transport and catabolism	Molecular Function: dioxygenase activity (GO:0051213);; Biological Process: oxidation-reduction process (GO:0055114);;	K09840|0.0|vvi:100267016|NCED;EC:1.13.11.51|hypothetical protein LOC100267016; K09840 9-cis-epoxycarotenoid dioxygenase [EC:1.13.11.51]	[Q]	Secondary metabolites biosynthesis, transport and catabolism	Retinal pigment epithelial membrane protein	9-cis-epoxycarotenoid dioxygenase NCED3, chloroplastic OS=Arabidopsis thaliana OX=3702 GN=NCED3 PE=2 SV=1	Lactuca sativa 9-cis-epoxycarotenoid dioxygenase 2
Unigene130828	31.6016	9.5806	-1.64838	0.000318303	0.00171906	down	[Q]	Secondary metabolites biosynthesis, transport and catabolism	Molecular Function: dioxygenase activity (GO:0051213);; Biological Process: oxidation-reduction process (GO:0055114);;	K09840|0.0|vvi:100267016|NCED;EC:1.13.11.51|hypothetical protein LOC100267016; K09840 9-cis-epoxycarotenoid dioxygenase [EC:1.13.11.51]	[Q]	Secondary metabolites biosynthesis, transport and catabolism	Retinal pigment epithelial membrane protein	9-cis-epoxycarotenoid dioxygenase NCED1, chloroplastic OS=Phaseolus vulgaris OX=3885 GN=NCED1 PE=2 SV=1	9-cis-epoxycarotenoid dioxygenase NCED1, chloroplastic-like [Lactuca sativa]
Unigene045943	45.6821	10.8516	-2.01202	1.19387e-06	9.46319e-06	down	[Q]	Secondary metabolites biosynthesis, transport and catabolism	Molecular Function: dioxygenase activity (GO:0051213);; Biological Process: oxidation-reduction process (GO:0055114);;	K09840|0.0|vvi:100267016|NCED;EC:1.13.11.51|hypothetical protein LOC100267016; K09840 9-cis-epoxycarotenoid dioxygenase [EC:1.13.11.51]	[Q]	Secondary metabolites biosynthesis, transport and catabolism	Retinal pigment epithelial membrane protein	9-cis-epoxycarotenoid dioxygenase NCED1, chloroplastic OS=Phaseolus vulgaris OX=3885 GN=NCED1 PE=2 SV=1	9-cis-epoxycarotenoid dioxygenase NCED1, chloroplastic-like [Lactuca sativa]
AAO	L-ascorbate oxidase
Unigene118968	148.902	0.560394	-6.97126	2.54423e-25	6.17542e-24	down	[Q]	Secondary metabolites biosynthesis, transport and catabolism	Molecular Function: copper ion binding (GO:0005507);; Molecular Function: oxidoreductase activity (GO:0016491);; Biological Process: oxidation-reduction process (GO:0055114);;	--	[Q]	Secondary metabolites biosynthesis, transport and catabolism	Multicopper oxidase;; Multicopper oxidase;; Multicopper oxidase	L-ascorbate oxidase homolog OS=Brassica napus OX=3708 GN=Bp10 PE=2 SV=1	L-ascorbate oxidase homolog [Helianthus annuus]
Unigene015717	193.78	41.517	-2.1962	5.11207e-25	1.22882e-23	down	[Q]	Secondary metabolites biosynthesis, transport and catabolism	Molecular Function: copper ion binding (GO:0005507);; Molecular Function: oxidoreductase activity (GO:0016491);; Biological Process: oxidation-reduction process (GO:0055114);;	--	[Q]	Secondary metabolites biosynthesis, transport and catabolism	Multicopper oxidase;; Multicopper oxidase;; Multicopper oxidase	L-ascorbate oxidase homolog OS=Nicotiana tabacum OX=4097 PE=2 SV=1	Cupredoxin, partial [Cynara cardunculus var. scolymus]
Unigene083270	30.9902	7.33865	-1.97647	4.44494e-05	0.000281946	down	[Q]	Secondary metabolites biosynthesis, transport and catabolism	Molecular Function: copper ion binding (GO:0005507);; Molecular Function: oxidoreductase activity (GO:0016491);; Biological Process: oxidation-reduction process (GO:0055114);;	--	[Q]	Secondary metabolites biosynthesis, transport and catabolism	Multicopper oxidase;; Multicopper oxidase;; Multicopper oxidase	L-ascorbate oxidase homolog OS=Brassica napus OX=3708 GN=Bp10 PE=2 SV=1	L-ascorbate oxidase homolog [Helianthus annuus]
Unigene102433	109.703	0.560394	-6.55422	1.2029e-21	2.55194e-20	down	--	--	--	--	[Q]	Secondary metabolites biosynthesis, transport and catabolism	Multicopper oxidase;; Multicopper oxidase	L-ascorbate oxidase homolog OS=Nicotiana tabacum OX=4097 PE=2 SV=1	L-ascorbate oxidase homolog [Helianthus annuus]
Unigene206916	57.6458	0.546534	-5.66327	5.48305e-15	8.55976e-14	down	[Q]	Secondary metabolites biosynthesis, transport and catabolism	Molecular Function: copper ion binding (GO:0005507);; Molecular Function: L-ascorbate oxidase activity (GO:0008447);; Biological Process: oxidation-reduction process (GO:0055114);;	--	[Q]	Secondary metabolites biosynthesis, transport and catabolism	Multicopper oxidase	L-ascorbate oxidase homolog OS=Nicotiana tabacum OX=4097 PE=2 SV=1	putative cupredoxin [Helianthus annuus]
Unigene121103	205.479	35.901	-2.4925	1.79633e-29	5.0465e-28	down	[Q]	Secondary metabolites biosynthesis, transport and catabolism	Molecular Function: copper ion binding (GO:0005507);; Cellular Component: extracellular region (GO:0005576);; Molecular Function: L-ascorbate oxidase activity (GO:0008447);; Biological Process: oxidation-reduction process (GO:0055114);;	--	[Q]	Secondary metabolites biosynthesis, transport and catabolism	Multicopper oxidase;; Multicopper oxidase;; Multicopper oxidase	L-ascorbate oxidase OS=Cucumis sativus OX=3659 PE=1 SV=1	L-ascorbate oxidase-like [Helianthus annuus]
Unigene188350	89.1496	10.9183	-2.93343	3.42764e-15	5.41186e-14	down	[Q]	Secondary metabolites biosynthesis, transport and catabolism	Molecular Function: copper ion binding (GO:0005507);; Molecular Function: oxidoreductase activity (GO:0016491);; Biological Process: oxidation-reduction process (GO:0055114);;	--	[Q]	Secondary metabolites biosynthesis, transport and catabolism	Multicopper oxidase;; Multicopper oxidase;; Multicopper oxidase;; Multicopper oxidase	L-ascorbate oxidase homolog OS=Brassica napus OX=3708 GN=Bp10 PE=2 SV=1	L-ascorbate oxidase homolog [Lactuca sativa]
Unigene168324	90.6816	36.845	-1.28273	1.00792e-06	8.06326e-06	down	[Q]	Secondary metabolites biosynthesis, transport and catabolism	Molecular Function: copper ion binding (GO:0005507);; Cellular Component: extracellular region (GO:0005576);; Molecular Function: L-ascorbate oxidase activity (GO:0008447);; Biological Process: oxidation-reduction process (GO:0055114);;	K00423|1e-107|vvi:100251280|E1.10.3.3;EC:1.10.3.3|hypothetical protein LOC100251280; K00423 L-ascorbate oxidase [EC:1.10.3.3]	[Q]	Secondary metabolites biosynthesis, transport and catabolism	Multicopper oxidase;; Multicopper oxidase	L-ascorbate oxidase OS=Nicotiana tabacum OX=4097 GN=AAO PE=2 SV=1	L-ascorbate oxidase-like [Helianthus annuus]
Unigene083497	242.188	61.555	-1.96583	8.22363e-28	2.17028e-26	down	[Q]	Secondary metabolites biosynthesis, transport and catabolism	Molecular Function: copper ion binding (GO:0005507);; Cellular Component: extracellular region (GO:0005576);; Molecular Function: L-ascorbate oxidase activity (GO:0008447);; Biological Process: oxidation-reduction process (GO:0055114);;	--	[Q]	Secondary metabolites biosynthesis, transport and catabolism	Multicopper oxidase;; Multicopper oxidase;; Multicopper oxidase	L-ascorbate oxidase OS=Cucumis sativus OX=3659 PE=1 SV=1	L-ascorbate oxidase-like [Helianthus annuus]
Unigene125737	1217.95	249.743	-2.28578	2.62032e-128	3.50391e-126	down	[Q]	Secondary metabolites biosynthesis, transport and catabolism	Molecular Function: copper ion binding (GO:0005507);; Cellular Component: plant-type cell wall (GO:0009505);; Molecular Function: oxidoreductase activity (GO:0016491);; Biological Process: oxidation-reduction process (GO:0055114);;	--	[Q]	Secondary metabolites biosynthesis, transport and catabolism	Multicopper oxidase;; Multicopper oxidase;; Multicopper oxidase	L-ascorbate oxidase homolog OS=Nicotiana tabacum OX=4097 PE=2 SV=1	hypothetical protein LSAT_4X168161 [Lactuca sativa]
Unigene026291	1925.76	383.773	-2.32642	3.57055e-202	8.40233e-200	down	[Q]	Secondary metabolites biosynthesis, transport and catabolism	Molecular Function: copper ion binding (GO:0005507);; Cellular Component: plant-type cell wall (GO:0009505);; Molecular Function: oxidoreductase activity (GO:0016491);; Biological Process: oxidation-reduction process (GO:0055114);;	--	[Q]	Secondary metabolites biosynthesis, transport and catabolism	Multicopper oxidase;; Multicopper oxidase;; Multicopper oxidase;; Multicopper oxidase	L-ascorbate oxidase homolog OS=Nicotiana tabacum OX=4097 PE=2 SV=1	L-ascorbate oxidase homolog [Helianthus annuus]
Unigene184347	65.209	30.218	-1.09354	0.000631997	0.00319273	down	[Q]	Secondary metabolites biosynthesis, transport and catabolism	Molecular Function: copper ion binding (GO:0005507);; Molecular Function: oxidoreductase activity (GO:0016491);; Biological Process: oxidation-reduction process (GO:0055114);;	--	[Q]	Secondary metabolites biosynthesis, transport and catabolism	Multicopper oxidase;; Multicopper oxidase;; Multicopper oxidase	L-ascorbate oxidase homolog OS=Nicotiana tabacum OX=4097 PE=2 SV=1	L-ascorbate oxidase homolog [Helianthus annuus]
Unigene188652	27.2261	7.584	-1.72841	0.00102462	0.00492399	down	--	--	Molecular Function: copper ion binding (GO:0005507);; Cellular Component: extracellular region (GO:0005576);; Molecular Function: L-ascorbate oxidase activity (GO:0008447);; Biological Process: oxidation-reduction process (GO:0055114);;	--	[Q]	Secondary metabolites biosynthesis, transport and catabolism	Multicopper oxidase	L-ascorbate oxidase OS=Nicotiana tabacum OX=4097 GN=AAO PE=2 SV=1	Cupredoxin [Cynara cardunculus var. scolymus]
Unigene088265	523.082	2.06437	-7.63256	4.27035e-60	2.38035e-58	down	[Q]	Secondary metabolites biosynthesis, transport and catabolism	Molecular Function: copper ion binding (GO:0005507);; Molecular Function: oxidoreductase activity (GO:0016491);; Biological Process: oxidation-reduction process (GO:0055114);;	--	[Q]	Secondary metabolites biosynthesis, transport and catabolism	Multicopper oxidase;; Multicopper oxidase;; Multicopper oxidase;; Multicopper oxidase	L-ascorbate oxidase homolog OS=Nicotiana tabacum OX=4097 PE=2 SV=1	L-ascorbate oxidase homolog [Helianthus annuus]
Unigene048152	124.788	27.7978	-2.13662	1.01543e-16	1.72907e-15	down	--	--	Molecular Function: copper ion binding (GO:0005507);; Cellular Component: cell wall (GO:0005618);; Molecular Function: oxidoreductase activity (GO:0016491);; Biological Process: oxidation-reduction process (GO:0055114);;	--	[Q]	Secondary metabolites biosynthesis, transport and catabolism	--	L-ascorbate oxidase homolog OS=Brassica napus OX=3708 GN=Bp10 PE=2 SV=1	putative SKU5 similar 17 [Helianthus annuus]
Unigene008241	209.276	27.1557	-2.92143	6.84631e-39	2.47905e-37	down	[Q]	Secondary metabolites biosynthesis, transport and catabolism	Molecular Function: copper ion binding (GO:0005507);; Molecular Function: L-ascorbate oxidase activity (GO:0008447);; Biological Process: oxidation-reduction process (GO:0055114);;	--	[Q]	Secondary metabolites biosynthesis, transport and catabolism	Multicopper oxidase;; Multicopper oxidase;; Multicopper oxidase	L-ascorbate oxidase homolog OS=Brassica napus OX=3708 GN=Bp10 PE=2 SV=1	L-ascorbate oxidase homolog [Lactuca sativa]
Unigene077900	584.376	167.074	-1.80429	2.62482e-54	1.31364e-52	down	[Q]	Secondary metabolites biosynthesis, transport and catabolism	Molecular Function: copper ion binding (GO:0005507);; Cellular Component: extracellular region (GO:0005576);; Molecular Function: oxidoreductase activity (GO:0016491);; Biological Process: oxidation-reduction process (GO:0055114);;	K00423|0.0|vvi:100251280|E1.10.3.3;EC:1.10.3.3|hypothetical protein LOC100251280; K00423 L-ascorbate oxidase [EC:1.10.3.3]	[Q]	Secondary metabolites biosynthesis, transport and catabolism	Multicopper oxidase;; Multicopper oxidase;; Multicopper oxidase	L-ascorbate oxidase OS=Nicotiana tabacum OX=4097 GN=AAO PE=2 SV=1	L-ascorbate oxidase-like [Helianthus annuus]
Unigene192901	43.0619	10.1137	-2.00049	4.3406e-06	3.20543e-05	down	--	--	Molecular Function: copper ion binding (GO:0005507);; Cellular Component: extracellular region (GO:0005576);; Molecular Function: oxidoreductase activity (GO:0016491);; Biological Process: oxidation-reduction process (GO:0055114);;	K00423|1e-115|vvi:100251280|E1.10.3.3;EC:1.10.3.3|hypothetical protein LOC100251280; K00423 L-ascorbate oxidase [EC:1.10.3.3]	[Q]	Secondary metabolites biosynthesis, transport and catabolism	Multicopper oxidase	L-ascorbate oxidase OS=Nicotiana tabacum OX=4097 GN=AAO PE=2 SV=1	L-ascorbate oxidase-like [Helianthus annuus]
PYL	Abscisic acid receptor PYL
Unigene183792	212.513	82.3389	-1.36163	7.33518e-14	1.07388e-12	down	--	--	--	K14496|1e-100|vvi:100267073|PYL;PYL|hypothetical protein LOC100267073; K14496 abscisic acid receptor PYR/PYL family	--	--	Polyketide cyclase / dehydrase and lipid transport;; Pathogenesis-related protein Bet v I family	Abscisic acid receptor PYL4 OS=Arabidopsis thaliana OX=3702 GN=PYL4 PE=1 SV=1	Polyketide cyclase/dehydrase [Cynara cardunculus var. scolymus]
Unigene014012	14.0437	46.7931	1.67649	5.95405e-05	0.000369706	up	--	--	--	K14496|9e-08|pop:POPTR_824546|PYL;PYL|hypothetical protein; K14496 abscisic acid receptor PYR/PYL family	--	--	--	Abscisic acid receptor PYL8 OS=Arabidopsis thaliana OX=3702 GN=PYL8 PE=1 SV=1	PREDICTED: abscisic acid receptor PYL8-like isoform X2 [Populus euphratica]
Unigene056798	971.876	342.842	-1.50147	7.91638e-54	3.91193e-52	down	--	--	--	K14496|6e-93|pop:POPTR_907261|PYL;PYL|hypothetical protein; K14496 abscisic acid receptor PYR/PYL family	--	--	Polyketide cyclase / dehydrase and lipid transport;; Pathogenesis-related protein Bet v I family;; Polyketide cyclase / dehydrase and lipid transport	Abscisic acid receptor PYL4 OS=Arabidopsis thaliana OX=3702 GN=PYL4 PE=1 SV=1	Polyketide cyclase/dehydrase [Cynara cardunculus var. scolymus]
Unigene108788	150.531	33.9476	-2.12339	1.1048e-19	2.16947e-18	down	--	--	Molecular Function: signaling receptor activity (GO:0004872);; Cellular Component: nucleus (GO:0005634);; Cellular Component: cytoplasm (GO:0005737);; Biological Process: abscisic acid-activated signaling pathway (GO:0009738);; Molecular Function: abscisic acid binding (GO:0010427);; Molecular Function: protein homodimerization activity (GO:0042803);;	K14496|5e-81|rcu:RCOM_0847730|PYL;PYL|hypothetical protein; K14496 abscisic acid receptor PYR/PYL family	--	--	Polyketide cyclase / dehydrase and lipid transport;; Pathogenesis-related protein Bet v I family;; Polyketide cyclase / dehydrase and lipid transport	Abscisic acid receptor PYL4 OS=Arabidopsis thaliana OX=3702 GN=PYL4 PE=1 SV=1	abscisic acid receptor PYL4-like [Lactuca sativa]
Unigene019404	5.53719	26.991	2.10623	0.000224896	0.00125312	up	--	--	--	K14496|7e-09|rcu:RCOM_1691820|PYL;PYL|hypothetical protein; K14496 abscisic acid receptor PYR/PYL family	--	--	--	Abscisic acid receptor PYL10 OS=Arabidopsis thaliana OX=3702 GN=PYL10 PE=1 SV=1	Polyketide cyclase/dehydrase [Cynara cardunculus var. scolymus]
Unigene092234	857.088	227.298	-1.91131	1.66123e-81	1.26795e-79	down	--	--	--	K14496|9e-95|vvi:100267073|PYL;PYL|hypothetical protein LOC100267073; K14496 abscisic acid receptor PYR/PYL family	--	--	Polyketide cyclase / dehydrase and lipid transport	Abscisic acid receptor PYL4 OS=Arabidopsis thaliana OX=3702 GN=PYL4 PE=1 SV=1	abscisic acid receptor PYL4-like [Helianthus annuus]
PYR	Abscisic acid receptor PYR
Unigene144895	225.887	96.3346	-1.22248	2.47836e-13	3.50885e-12	down	--	--	--	K14496|5e-65|vvi:100267793|PYL;PYL|hypothetical protein LOC100267793; K14496 abscisic acid receptor PYR/PYL family	--	--	Polyketide cyclase / dehydrase and lipid transport;; Polyketide cyclase / dehydrase and lipid transport	Abscisic acid receptor PYR1 OS=Arabidopsis thaliana OX=3702 GN=PYR1 PE=1 SV=1	Polyketide cyclase/dehydrase [Cynara cardunculus var. scolymus]
SNRK2	Serine/threonine-protein kinase SRK2
Unigene104842	495.09	1036.94	1.06406	1.61723e-37	5.65696e-36	up	[RTKL]	--	Molecular Function: protein serine/threonine kinase activity (GO:0004674);; Molecular Function: ATP binding (GO:0005524);; Biological Process: protein phosphorylation (GO:0006468);; Biological Process: regulation of signal transduction (GO:0009966);;	K14498|1e-112|ath:AT4G33950|SNRK2;EC:2.7.11.1|OST1; OST1 (OPEN STOMATA 1); calcium-dependent protein serine/threonine kinase/ kinase/ protein kinase; K14498 serine/threonine-protein kinase SRK2 [EC:2.7.11.1]	[T]	Signal transduction mechanisms	Protein kinase domain;; Protein tyrosine kinase	Serine/threonine-protein kinase SRK2E OS=Arabidopsis thaliana OX=3702 GN=SRK2E PE=1 SV=1	putative NB-ARC [Helianthus annuus]
Unigene082678	838.819	1857.43	1.14338	1.7617e-54	8.83407e-53	up	[RTKL]	--	Molecular Function: protein serine/threonine kinase activity (GO:0004674);; Molecular Function: ATP binding (GO:0005524);; Cellular Component: nucleus (GO:0005634);; Cellular Component: cytosol (GO:0005829);; Biological Process: protein phosphorylation (GO:0006468);; Biological Process: abscisic acid-activated signaling pathway (GO:0009738);; Biological Process: intracellular signal transduction …	K14498|1e-105|ath:AT4G33950|SNRK2;EC:2.7.11.1|OST1; OST1 (OPEN STOMATA 1); calcium-dependent protein serine/threonine kinase/ kinase/ protein kinase; K14498 serine/threonine-protein kinase SRK2 [EC:2.7.11.1]	[T]	Signal transduction mechanisms	Protein kinase domain;; Protein tyrosine kinase;; Protein kinase domain;; Protein tyrosine kinase	Serine/threonine-protein kinase SRK2E OS=Arabidopsis thaliana OX=3702 GN=SRK2E PE=1 SV=1	putative NB-ARC [Helianthus annuus]
Unigene165091	102.49	216.577	1.07803	5.21654e-09	5.32445e-08	up	--	--	Molecular Function: protein kinase activity (GO:0004672);; Molecular Function: ATP binding (GO:0005524);; Biological Process: protein phosphorylation (GO:0006468);;	K14498|3e-18|rcu:RCOM_0774030|SNRK2;EC:2.7.11.1|Serine/threonine-protein kinase SAPK10, putative (EC:2.7.11.1); K14498 serine/threonine-protein kinase SRK2 [EC:2.7.11.1]	[T]	Signal transduction mechanisms	--	Serine/threonine-protein kinase SRK2E OS=Arabidopsis thaliana OX=3702 GN=SRK2E PE=1 SV=1	Protein kinase, ATP binding site-containing protein [Cynara cardunculus var. scolymus]
ABF	ABSCISIC ACID-INSENSITIVE 5-like protein
Unigene022686	358.839	975.47	1.43662	1.43506e-52	6.89418e-51	up	--	--	--	K14432|1e-106|vvi:100232889|ABF;ABF|GRIP55; ripening-related bZIP protein-like; K14432 ABA responsive element binding factor	--	--	bZIP transcription factor;; Basic region leucine zipper	ABSCISIC ACID-INSENSITIVE 5-like protein 7 OS=Arabidopsis thaliana OX=3702 GN=ABF4 PE=1 SV=1	putative ABRE binding factor 4 [Helianthus annuus]
Unigene090853	16.7316	44.9871	1.36407	0.00129892	0.00608101	up	--	--	--	K14432|8e-44|rcu:RCOM_0813280|ABF;ABF|DNA binding protein, putative; K14432 ABA responsive element binding factor	--	--	--	ABSCISIC ACID-INSENSITIVE 5-like protein 7 OS=Arabidopsis thaliana OX=3702 GN=ABF4 PE=1 SV=1	bZIP transcription factor 23-like [Lactuca sativa]
Unigene074093	154.698	321.829	1.05188	4.43757e-14	6.5875e-13	up	--	--	--	K14432|1e-124|vvi:100232889|ABF;ABF|GRIP55; ripening-related bZIP protein-like; K14432 ABA responsive element binding factor	--	--	--	ABSCISIC ACID-INSENSITIVE 5-like protein 5 OS=Arabidopsis thaliana OX=3702 GN=ABF2 PE=1 SV=1	Basic-leucine zipper domain-containing protein [Cynara cardunculus var. scolymus]
Unigene033430	10.5124	42.051	1.90647	2.45704e-05	0.000162879	up	--	--	Molecular Function: DNA-binding transcription factor activity (GO:0003700);; Molecular Function: protein binding (GO:0005515);; Cellular Component: nucleus (GO:0005634);; Biological Process: response to water deprivation (GO:0009414);; Biological Process: response to salt stress (GO:0009651);; Biological Process: abscisic acid-activated signaling pathway (GO:0009738);; Biological Process: glucose…	K14432|6e-15|ath:AT1G45249|ABF;ABF|ABF2; ABF2 (ABSCISIC ACID RESPONSIVE ELEMENTS-BINDING FACTOR 2); DNA binding / protein binding / transcription activator/ transcription factor; K14432 ABA responsive element binding factor	--	--	--	ABSCISIC ACID-INSENSITIVE 5-like protein 5 OS=Arabidopsis thaliana OX=3702 GN=ABF2 PE=1 SV=1	putative basic-leucine zipper domain-containing protein [Helianthus annuus]
Unigene129063	276.862	682.073	1.29307	5.99723e-33	1.8722e-31	up	--	--	--	K14432|6e-53|vvi:100232889|ABF;ABF|GRIP55; ripening-related bZIP protein-like; K14432 ABA responsive element binding factor	--	--	--	ABSCISIC ACID-INSENSITIVE 5-like protein 5 OS=Arabidopsis thaliana OX=3702 GN=ABF2 PE=1 SV=1	Basic-leucine zipper domain-containing protein [Cynara cardunculus var. scolymus]
Unigene080280	37.518	97.0189	1.33718	1.44903e-06	1.13743e-05	up	--	--	--	K14432|9e-29|pop:POPTR_677861|ABF;ABF|hypothetical protein; K14432 ABA responsive element binding factor	--	--	--	ABSCISIC ACID-INSENSITIVE 5-like protein 7 OS=Arabidopsis thaliana OX=3702 GN=ABF4 PE=1 SV=1	bZIP transcription factor 46-like isoform X2 [Helianthus annuus]
Unigene204842	171.257	350.206	1.02811	4.10131e-14	6.10078e-13	up	--	--	--	K14432|1e-127|vvi:100232889|ABF;ABF|GRIP55; ripening-related bZIP protein-like; K14432 ABA responsive element binding factor	--	--	--	ABSCISIC ACID-INSENSITIVE 5-like protein 5 OS=Arabidopsis thaliana OX=3702 GN=ABF2 PE=1 SV=1	Basic-leucine zipper domain-containing protein [Cynara cardunculus var. scolymus]
Unigene142895	131.315	280.327	1.09449	7.26913e-12	9.34269e-11	up	--	--	--	K14432|4e-60|vvi:100266389|ABF;ABF|hypothetical protein LOC100266389; K14432 ABA responsive element binding factor	--	--	--	ABSCISIC ACID-INSENSITIVE 5-like protein 2 OS=Arabidopsis thaliana OX=3702 GN=DPBF3 PE=1 SV=1	ABSCISIC ACID-INSENSITIVE 5-like protein 2 [Helianthus annuus]
JA
LOX	Linoleate 13S-lipoxygenase
Unigene131601	2251.87	68.8274	-5.02232	0	0	down	--	--	Cellular Component: chloroplast thylakoid (GO:0009534);; Cellular Component: chloroplast stroma (GO:0009570);; Molecular Function: linoleate 13S-lipoxygenase activity (GO:0016165);; Biological Process: oxylipin biosynthetic process (GO:0031408);; Molecular Function: metal ion binding (GO:0046872);; Biological Process: oxidation-reduction process (GO:0055114);;	--	--	--	Lipoxygenase	Linoleate 13S-lipoxygenase 3-1, chloroplastic OS=Solanum tuberosum OX=4113 GN=LOX3.1 PE=1 SV=1	lipoxygenase 1 [Tanacetum cinerariifolium]
Unigene073390	390.939	16.4675	-4.51141	4.09044e-87	3.37213e-85	down	--	--	Molecular Function: oxidoreductase activity, acting on single donors with incorporation of molecular oxygen, incorporation of two atoms of oxygen (GO:0016702);; Biological Process: oxylipin biosynthetic process (GO:0031408);; Molecular Function: metal ion binding (GO:0046872);; Biological Process: oxidation-reduction process (GO:0055114);;	--	--	--	Lipoxygenase	Linoleate 13S-lipoxygenase 3-1, chloroplastic OS=Solanum tuberosum OX=4113 GN=LOX3.1 PE=1 SV=1	linoleate 13S-lipoxygenase 3-1, chloroplastic [Lactuca sativa]
Unigene061866	20.6134	7.35289	-1.39436	0.00936467	0.0337368	down	--	--	Molecular Function: oxidoreductase activity, acting on single donors with incorporation of molecular oxygen, incorporation of two atoms of oxygen (GO:0016702);; Biological Process: oxylipin biosynthetic process (GO:0031408);; Molecular Function: metal ion binding (GO:0046872);; Biological Process: oxidation-reduction process (GO:0055114);;	K00454|0.0|vvi:100257867|LOX2S;EC:1.13.11.12|hypothetical protein LOC100257867	--	--	Lipoxygenase;; PLAT/LH2 domain	Linoleate 13S-lipoxygenase 2-1, chloroplastic OS=Solanum tuberosum OX=4113 GN=LOX2.1 PE=1 SV=1	lipoxygenase 2 [Tanacetum cinerariifolium]
Unigene049704	323.242	53.4376	-2.58549	1.5207e-48	6.74877e-47	down	--	--	Molecular Function: oxidoreductase activity, acting on single donors with incorporation of molecular oxygen, incorporation of two atoms of oxygen (GO:0016702);; Biological Process: oxylipin biosynthetic process (GO:0031408);; Molecular Function: metal ion binding (GO:0046872);; Biological Process: oxidation-reduction process (GO:0055114);;	K00454|0.0|vvi:100257867|LOX2S;EC:1.13.11.12|hypothetical protein LOC100257867	--	--	Lipoxygenase	Linoleate 13S-lipoxygenase 2-1, chloroplastic OS=Solanum tuberosum OX=4113 GN=LOX2.1 PE=1 SV=1	linoleate 13S-lipoxygenase 2-1, chloroplastic-like [Helianthus annuus]
Unigene171801	144.227	18.5305	-2.90072	9.95084e-26	2.44205e-24	down	--	--	Molecular Function: oxidoreductase activity, acting on single donors with incorporation of molecular oxygen, incorporation of two atoms of oxygen (GO:0016702);; Biological Process: oxylipin biosynthetic process (GO:0031408);; Molecular Function: metal ion binding (GO:0046872);; Biological Process: oxidation-reduction process (GO:0055114);;	--	--	--	Lipoxygenase;; Lipoxygenase	Linoleate 13S-lipoxygenase 2-1, chloroplastic OS=Solanum tuberosum OX=4113 GN=LOX2.1 PE=1 SV=1	linoleate 13S-lipoxygenase 2-1, chloroplastic-like [Helianthus annuus]
Unigene043124	42.6385	3.44399	-3.4234	8.2001e-11	9.73039e-10	down	--	--	--	--	--	--	--	Linoleate 13S-lipoxygenase 3-1, chloroplastic OS=Solanum tuberosum OX=4113 GN=LOX3.1 PE=1 SV=1	--
Unigene074059	138.098	20.7719	-2.69047	7.23411e-23	1.60139e-21	down	--	--	Molecular Function: oxidoreductase activity (GO:0016491);; Biological Process: metabolic process (GO:0044710);;	--	--	--	Lipoxygenase;; PLAT/LH2 domain	Linoleate 13S-lipoxygenase 2-1, chloroplastic OS=Solanum tuberosum OX=4113 GN=LOX2.1 PE=1 SV=1	linoleate 13S-lipoxygenase 2-1, chloroplastic-like [Helianthus annuus]
Unigene131884	76.7987	12.2986	-2.56687	6.96533e-13	9.59227e-12	down	--	--	Molecular Function: oxidoreductase activity, acting on single donors with incorporation of molecular oxygen, incorporation of two atoms of oxygen (GO:0016702);; Biological Process: oxylipin biosynthetic process (GO:0031408);; Molecular Function: metal ion binding (GO:0046872);; Biological Process: oxidation-reduction process (GO:0055114);;	--	--	--	Lipoxygenase	Linoleate 13S-lipoxygenase 2-1, chloroplastic OS=Solanum tuberosum OX=4113 GN=LOX2.1 PE=1 SV=1	linoleate 13S-lipoxygenase 2-1, chloroplastic-like [Helianthus annuus]
Unigene126712	515.385	18.9133	-4.71057	5.57658e-111	6.16966e-109	down	--	--	Cellular Component: thylakoid (GO:0009579);; Molecular Function: linoleate 13S-lipoxygenase activity (GO:0016165);; Biological Process: oxylipin biosynthetic process (GO:0031408);; Cellular Component: chloroplast part (GO:0044434);; Molecular Function: metal ion binding (GO:0046872);; Biological Process: oxidation-reduction process (GO:0055114);;	--	--	--	Lipoxygenase;; PLAT/LH2 domain	Linoleate 13S-lipoxygenase 3-1, chloroplastic OS=Solanum tuberosum OX=4113 GN=LOX3.1 PE=1 SV=1	linoleate 13S-lipoxygenase 3-1, chloroplastic [Lactuca sativa]
Unigene096547	188.089	6.45089	-4.74172	4.76406e-43	1.88445e-41	down	--	--	Molecular Function: oxidoreductase activity, acting on single donors with incorporation of molecular oxygen, incorporation of two atoms of oxygen (GO:0016702);; Biological Process: oxylipin biosynthetic process (GO:0031408);; Molecular Function: metal ion binding (GO:0046872);; Biological Process: oxidation-reduction process (GO:0055114);;	K00454|1e-35|osa:4331824|LOX2S;EC:1.13.11.12|Os03g0179900; K00454 lipoxygenase [EC:1.13.11.12]	--	--	Lipoxygenase	Linoleate 13S-lipoxygenase 3-1, chloroplastic OS=Solanum tuberosum OX=4113 GN=LOX3.1 PE=1 SV=1	linoleate 13S-lipoxygenase 3-1, chloroplastic [Lactuca sativa]
Unigene064401	2543.35	761.006	-1.74072	2.79087e-170	5.27599e-168	down	--	--	Molecular Function: oxidoreductase activity, acting on single donors with incorporation of molecular oxygen, incorporation of two atoms of oxygen (GO:0016702);; Biological Process: oxylipin biosynthetic process (GO:0031408);; Molecular Function: metal ion binding (GO:0046872);; Biological Process: oxidation-reduction process (GO:0055114);;	--	--	--	Lipoxygenase	Linoleate 13S-lipoxygenase 3-1, chloroplastic OS=Solanum tuberosum OX=4113 GN=LOX3.1 PE=1 SV=1	linoleate 13S-lipoxygenase 3-1, chloroplastic-like [Helianthus annuus]
Unigene089562	2583.78	75.2107	-5.0999	0	0	down	--	--	Molecular Function: oxidoreductase activity, acting on single donors with incorporation of molecular oxygen, incorporation of two atoms of oxygen (GO:0016702);; Biological Process: oxylipin biosynthetic process (GO:0031408);; Molecular Function: metal ion binding (GO:0046872);; Biological Process: oxidation-reduction process (GO:0055114);;	--	--	--	Lipoxygenase	Linoleate 13S-lipoxygenase 3-1, chloroplastic OS=Solanum tuberosum OX=4113 GN=LOX3.1 PE=1 SV=1	lipoxygenase 1 [Tanacetum cinerariifolium]
Unigene010772	189.921	7.25664	-4.59532	9.44385e-45	3.90061e-43	down	--	--	Cellular Component: chloroplast thylakoid (GO:0009534);; Cellular Component: chloroplast stroma (GO:0009570);; Molecular Function: linoleate 13S-lipoxygenase activity (GO:0016165);; Biological Process: oxylipin biosynthetic process (GO:0031408);; Molecular Function: metal ion binding (GO:0046872);; Biological Process: oxidation-reduction process (GO:0055114);;	--	--	--	Lipoxygenase;; PLAT/LH2 domain	Linoleate 13S-lipoxygenase 3-1, chloroplastic OS=Solanum tuberosum OX=4113 GN=LOX3.1 PE=1 SV=1	linoleate 13S-lipoxygenase 3-1, chloroplastic [Lactuca sativa]
Unigene106148	3.98985	0	-2.80143	0.0109281	0.0384462	down	--	--	Molecular Function: oxidoreductase activity, acting on single donors with incorporation of molecular oxygen, incorporation of two atoms of oxygen (GO:0016702);; Biological Process: oxylipin biosynthetic process (GO:0031408);; Molecular Function: metal ion binding (GO:0046872);; Biological Process: oxidation-reduction process (GO:0055114);;	K00454|0.0|vvi:100257867|LOX2S;EC:1.13.11.12|hypothetical protein LOC100257867	--	--	Lipoxygenase	Linoleate 13S-lipoxygenase 2-1, chloroplastic OS=Solanum tuberosum OX=4113 GN=LOX2.1 PE=1 SV=1	linoleate 13S-lipoxygenase 2-1, chloroplastic-like [Lactuca sativa]
Unigene006861	1080.78	419.223	-1.36649	2.98181e-46	1.27126e-44	down	--	--	Molecular Function: oxidoreductase activity, acting on single donors with incorporation of molecular oxygen, incorporation of two atoms of oxygen (GO:0016702);; Biological Process: oxylipin biosynthetic process (GO:0031408);; Molecular Function: metal ion binding (GO:0046872);; Biological Process: oxidation-reduction process (GO:0055114);;	--	--	--	Lipoxygenase;; Lipoxygenase	Linoleate 13S-lipoxygenase 3-1, chloroplastic OS=Solanum tuberosum OX=4113 GN=LOX3.1 PE=1 SV=1	Lipase/lipooxygenase, PLAT/LH2, partial [Cynara cardunculus var. scolymus]
Unigene168024	5693.49	1917.21	-1.57063	5.95777e-216	1.52529e-213	down	--	--	Cellular Component: chloroplast thylakoid (GO:0009534);; Cellular Component: chloroplast stroma (GO:0009570);; Molecular Function: linoleate 13S-lipoxygenase activity (GO:0016165);; Biological Process: oxylipin biosynthetic process (GO:0031408);; Molecular Function: metal ion binding (GO:0046872);; Biological Process: oxidation-reduction process (GO:0055114);;	--	--	--	Lipoxygenase;; PLAT/LH2 domain	Linoleate 13S-lipoxygenase 3-1, chloroplastic OS=Solanum tuberosum OX=4113 GN=LOX3.1 PE=1 SV=1	linoleate 13S-lipoxygenase 3-1, chloroplastic-like [Lactuca sativa]
Unigene175071	109.516	6.80597	-3.89586	1.35868e-25	3.31917e-24	down	--	--	Molecular Function: oxidoreductase activity, acting on single donors with incorporation of molecular oxygen, incorporation of two atoms of oxygen (GO:0016702);; Biological Process: oxylipin biosynthetic process (GO:0031408);; Molecular Function: metal ion binding (GO:0046872);; Biological Process: oxidation-reduction process (GO:0055114);;	K00454|8e-44|vvi:100257867|LOX2S;EC:1.13.11.12|hypothetical protein LOC100257867	--	--	Lipoxygenase	Linoleate 13S-lipoxygenase 2-1, chloroplastic OS=Solanum tuberosum OX=4113 GN=LOX2.1 PE=1 SV=1	linoleate 13S-lipoxygenase 2-1, chloroplastic-like [Helianthus annuus]
Unigene040963	694.007	280.95	-1.30117	3.21405e-37	1.11545e-35	down	--	--	Cellular Component: chloroplast thylakoid (GO:0009534);; Cellular Component: chloroplast stroma (GO:0009570);; Molecular Function: linoleate 13S-lipoxygenase activity (GO:0016165);; Biological Process: oxylipin biosynthetic process (GO:0031408);; Molecular Function: metal ion binding (GO:0046872);; Biological Process: oxidation-reduction process (GO:0055114);;	--	--	--	Lipoxygenase	Linoleate 13S-lipoxygenase 3-1, chloroplastic OS=Solanum tuberosum OX=4113 GN=LOX3.1 PE=1 SV=1	linoleate 13S-lipoxygenase 3-1, chloroplastic-like [Lactuca sativa]
Unigene150776	5.82731	0	-3.40876	0.00140642	0.00652637	down	--	--	--	--	--	--	--	Linoleate 13S-lipoxygenase 3-1, chloroplastic OS=Solanum tuberosum OX=4113 GN=LOX3.1 PE=1 SV=1	linoleate 13S lipoxygenase D, partial [Solanum muricatum]
Unigene003231	100.87	10.4804	-3.16005	4.13955e-18	7.50935e-17	down	--	--	Molecular Function: oxidoreductase activity, acting on single donors with incorporation of molecular oxygen, incorporation of two atoms of oxygen (GO:0016702);; Molecular Function: metal ion binding (GO:0046872);; Biological Process: oxidation-reduction process (GO:0055114);;	--	--	--	Lipoxygenase	Linoleate 13S-lipoxygenase 2-1, chloroplastic OS=Solanum tuberosum OX=4113 GN=LOX2.1 PE=1 SV=1	linoleate 13S-lipoxygenase 2-1, chloroplastic-like [Helianthus annuus]
Unigene047214	59.7275	23.9308	-1.29699	7.77125e-05	0.000473142	down	--	--	Molecular Function: oxidoreductase activity, acting on single donors with incorporation of molecular oxygen, incorporation of two atoms of oxygen (GO:0016702);; Biological Process: oxylipin biosynthetic process (GO:0031408);; Molecular Function: metal ion binding (GO:0046872);; Biological Process: oxidation-reduction process (GO:0055114);;	--	--	--	Lipoxygenase;; PLAT/LH2 domain	Linoleate 13S-lipoxygenase 2-1, chloroplastic OS=Solanum tuberosum OX=4113 GN=LOX2.1 PE=1 SV=1	linoleate 13S-lipoxygenase 2-1, chloroplastic-like [Lactuca sativa]
Unigene020634	50.8642	2.91093	-3.88744	9.04467e-13	1.23573e-11	down	--	--	Molecular Function: oxidoreductase activity (GO:0016491);; Biological Process: metabolic process (GO:0044710);;	K00454|4e-19|ath:AT1G72520|LOX2S;EC:1.13.11.12|lipoxygenase, putative (EC:1.13.11.12); K00454 lipoxygenase [EC:1.13.11.12]	--	--	--	Linoleate 13S-lipoxygenase 3-1, chloroplastic OS=Solanum tuberosum OX=4113 GN=LOX3.1 PE=1 SV=1	linoleate 13S-lipoxygenase 3-1, chloroplastic [Lactuca sativa]
AOC	Allene oxide cyclase
Unigene052031	267.705	54.9379	-2.26671	3.07399e-36	1.04027e-34	down	--	--	Biological Process: metabolic process (GO:0008152);; Cellular Component: chloroplast (GO:0009507);; Molecular Function: isomerase activity (GO:0016853);;	--	--	--	Allene oxide cyclase	Allene oxide cyclase, chloroplastic OS=Oryza sativa subsp. japonica OX=39947 GN=AOC PE=1 SV=1	allene oxide cyclase, chloroplastic-like [Helianthus annuus]
Unigene056834	18.2295	6.25982	-1.44166	0.0127342	0.0436782	down	--	--	--	--	--	--	--	Allene oxide cyclase 4, chloroplastic OS=Arabidopsis thaliana OX=3702 GN=AOC4 PE=2 SV=1	allene oxide cyclase, chloroplastic-like [Helianthus annuus]
Unigene076562	1124.75	504.844	-1.15395	2.5286e-45	1.06161e-43	down	--	--	Biological Process: metabolic process (GO:0008152);; Cellular Component: chloroplast (GO:0009507);; Molecular Function: isomerase activity (GO:0016853);;	--	--	--	Allene oxide cyclase	Allene oxide cyclase, chloroplastic OS=Oryza sativa subsp. japonica OX=39947 GN=AOC PE=1 SV=1	allene oxide cyclase, chloroplastic-like [Helianthus annuus]
Unigene110357	401.583	177.673	-1.17193	3.63216e-19	6.96854e-18	down	--	--	Biological Process: metabolic process (GO:0008152);; Cellular Component: chloroplast (GO:0009507);; Molecular Function: allene-oxide cyclase activity (GO:0046423);;	--	--	--	Allene oxide cyclase	Allene oxide cyclase, chloroplastic OS=Oryza sativa subsp. japonica OX=39947 GN=AOC PE=1 SV=1	allene oxide cyclase, chloroplastic-like [Helianthus annuus]
Unigene124237	293.242	70.4226	-2.03958	1.26655e-30	3.68728e-29	down	--	--	Biological Process: metabolic process (GO:0008152);; Cellular Component: chloroplast (GO:0009507);; Molecular Function: isomerase activity (GO:0016853);;	--	--	--	Allene oxide cyclase	Allene oxide cyclase, chloroplastic OS=Oryza sativa subsp. japonica OX=39947 GN=AOC PE=1 SV=1	hypothetical protein LSAT_4X153121 [Lactuca sativa]
OPR	12-oxophytodienoate reductase
Unigene013326	186.103	14.9796	-3.58377	4.13329e-39	1.50684e-37	down	[C]	Energy production and conversion	Molecular Function: FMN binding (GO:0010181);; Molecular Function: oxidoreductase activity (GO:0016491);; Biological Process: oxidation-reduction process (GO:0055114);;	K05894|0.0|vvi:100244746|OPR;EC:1.3.1.42|hypothetical protein LOC100244746	[CR]	--	NADH:flavin oxidoreductase / NADH oxidase family	Putative 12-oxophytodienoate reductase 11 OS=Oryza sativa subsp. japonica OX=39947 GN=OPR11 PE=2 SV=1	12-oxophytodienoate reductase 2-like [Helianthus annuus]
Unigene008647	9.2489	0.861189	-2.71052	0.00218758	0.00962618	down	[C]	Energy production and conversion	--	--	[CR]	--	NADH:flavin oxidoreductase / NADH oxidase family	Putative 12-oxophytodienoate reductase 11 OS=Oryza sativa subsp. japonica OX=39947 GN=OPR11 PE=2 SV=1	PREDICTED: putative 12-oxophytodienoate reductase 11 [Ziziphus jujuba]
Unigene201143	83.7522	2.97879	-4.52618	3.354e-21	7.01469e-20	down	[C]	Energy production and conversion	Molecular Function: FMN binding (GO:0010181);; Molecular Function: oxidoreductase activity (GO:0016491);; Biological Process: oxidation-reduction process (GO:0055114);;	K05894|0.0|vvi:100244746|OPR;EC:1.3.1.42|hypothetical protein LOC100244746	[CR]	--	NADH:flavin oxidoreductase / NADH oxidase family	12-oxophytodienoate reductase 1 OS=Solanum lycopersicum OX=4081 GN=OPR1 PE=1 SV=1	12-oxophytodienoate reductase 2-like [Helianthus annuus]
Unigene060187	5.44468	0	-3.27081	0.00243778	0.010589	down	[C]	Energy production and conversion	Molecular Function: FMN binding (GO:0010181);; Molecular Function: oxidoreductase activity (GO:0016491);; Biological Process: oxidation-reduction process (GO:0055114);;	--	[CR]	--	NADH:flavin oxidoreductase / NADH oxidase family;; NADH:flavin oxidoreductase / NADH oxidase family	12-oxophytodienoate reductase 1 OS=Arabidopsis thaliana OX=3702 GN=OPR1 PE=1 SV=2	PREDICTED: putative 12-oxophytodienoate reductase 11 [Ipomoea nil]
Unigene115385	52.7511	11.2464	-2.15288	1.16532e-07	1.04067e-06	down	[C]	Energy production and conversion	Molecular Function: FMN binding (GO:0010181);; Molecular Function: oxidoreductase activity (GO:0016491);; Biological Process: oxidation-reduction process (GO:0055114);;	K05894|1e-111|vvi:100256548|OPR;EC:1.3.1.42|hypothetical protein LOC100256548	[CR]	--	NADH:flavin oxidoreductase / NADH oxidase family	12-oxophytodienoate reductase 1 OS=Solanum lycopersicum OX=4081 GN=OPR1 PE=1 SV=1	putative 12-oxophytodienoate reductase 11 [Helianthus annuus]
JAR
Unigene005374	1.0825	15.416	3.1299	0.000111196	0.00065748	up	--	--	Cellular Component: cytoplasm (GO:0005737);; Biological Process: metabolic process (GO:0008152);; Biological Process: induced systemic resistance, jasmonic acid mediated signaling pathway (GO:0009864);; Biological Process: response to mycotoxin (GO:0010046);; Biological Process: response to UV-B (GO:0010224);; Molecular Function: ligase activity (GO:0016874);; Molecular Function: enzyme binding (…	K14506|3e-27|vvi:100251627|JAR1;JAR1|hypothetical protein LOC100251627; K14506 jasmonic acid-amino synthetase	--	--	GH3 auxin-responsive promoter	Jasmonic acid-amido synthetase JAR1 OS=Oryza sativa subsp. japonica OX=39947 GN=GH3.5 PE=2 SV=1	jasmonic acid-amido synthetase JAR1-like isoform X2 [Helianthus annuus]
Unigene056528	570.308	2830.08	2.30674	2.56692e-275	9.90745e-273	up	--	--	--	K14506|0.0|vvi:100251627|JAR1;JAR1|hypothetical protein LOC100251627; K14506 jasmonic acid-amino synthetase	--	--	GH3 auxin-responsive promoter	Jasmonic acid-amido synthetase JAR1 OS=Oryza sativa subsp. japonica OX=39947 GN=GH3.5 PE=2 SV=1	putative GH3 family [Helianthus annuus]
COI1
Unigene051736	80.6466	251.381	1.63103	4.62437e-21	9.60652e-20	up	--	--	Biological Process: response to molecule of bacterial origin (GO:0002237);; Biological Process: response to insect (GO:0009625);; Biological Process: shade avoidance (GO:0009641);; Biological Process: jasmonic acid and ethylene-dependent systemic resistance (GO:0009861);; Biological Process: jasmonic acid mediated signaling pathway (GO:0009867);; Biological Process: regulation of flower developme…	K13463|9e-65|vvi:100254771|COI-1;COI-1|hypothetical protein LOC100254771; K13463 coronatine-insensitive protein 1	[R]	General function prediction only	--	Coronatine-insensitive protein 1 OS=Arabidopsis thaliana OX=3702 GN=COI1 PE=1 SV=1	hypothetical protein Ccrd_011696 [Cynara cardunculus var. scolymus]
Unigene195512	88.6465	242.556	1.43478	1.08009e-15	1.74664e-14	up	--	--	Biological Process: response to molecule of bacterial origin (GO:0002237);; Biological Process: response to insect (GO:0009625);; Biological Process: shade avoidance (GO:0009641);; Biological Process: jasmonic acid and ethylene-dependent systemic resistance (GO:0009861);; Biological Process: jasmonic acid mediated signaling pathway (GO:0009867);; Biological Process: regulation of flower developme…	K13463|4e-65|vvi:100254771|COI-1;COI-1|hypothetical protein LOC100254771; K13463 coronatine-insensitive protein 1	[R]	General function prediction only	--	Coronatine-insensitive protein 1 OS=Arabidopsis thaliana OX=3702 GN=COI1 PE=1 SV=1	hypothetical protein Ccrd_011696 [Cynara cardunculus var. scolymus]
JAZ
Unigene014235	3126.21	10.5646	-8.13491	1.85648e-264	6.66077e-262	down	--	--	Biological Process: response to hormone (GO:0009725);; Biological Process: cellular process (GO:0044763);; Biological Process: regulation of cellular process (GO:0050794);;	K13464|7e-34|pop:POPTR_548076|JAZ;JAZ|hypothetical protein; K13464 jasmonate ZIM domain-containing protein	--	--	tify domain;; Divergent CCT motif	Protein TIFY 9 OS=Arabidopsis thaliana OX=3702 GN=TIFY9 PE=1 SV=1	jasmonate ZIM-domain protein 5 [Artemisia annua]
Unigene014778	643.495	0.286935	-9.25604	2.43399e-42	9.50237e-41	down	--	--	--	K13464|2e-20|ath:AT1G74950|JAZ;JAZ|TIFY10B; K13464 jasmonate ZIM domain-containing protein	--	--	tify domain;; Divergent CCT motif	Protein TIFY 10B OS=Arabidopsis thaliana OX=3702 GN=TIFY10B PE=1 SV=1	protein TIFY 10A-like [Lactuca sativa]
Unigene023898	876.308	191.382	-2.18912	3.59899e-101	3.52954e-99	down	--	--	--	K13464|3e-07|vvi:100262965|JAZ;JAZ|hypothetical protein LOC100262965; K13464 jasmonate ZIM domain-containing protein	--	--	--	--	protein TIFY 6A-like isoform X2 [Lactuca sativa]
Unigene040346	3910.8	750.154	-2.3799	0	0	down	--	--	--	K13464|9e-16|pop:POPTR_817040|JAZ;JAZ|hypothetical protein; K13464 jasmonate ZIM domain-containing protein	--	--	Divergent CCT motif;; tify domain	Protein TIFY 11B OS=Arabidopsis thaliana OX=3702 GN=TIFY11B PE=1 SV=1	CO/COL/TOC1, conserved site-containing protein [Cynara cardunculus var. scolymus]
Unigene054175	457.419	1.94078	-7.44406	2.69535e-56	1.39625e-54	down	--	--	--	K13464|2e-27|rcu:RCOM_0684970|JAZ;JAZ|hypothetical protein; K13464 jasmonate ZIM domain-containing protein	--	--	tify domain;; Divergent CCT motif	Protein TIFY 10A OS=Arabidopsis thaliana OX=3702 GN=TIFY10A PE=1 SV=1	protein TIFY 10A-like [Lactuca sativa]
Unigene055024	47.5822	0.300795	-5.77857	6.43734e-13	8.88558e-12	down	--	--	Biological Process: response to hormone (GO:0009725);; Biological Process: cellular process (GO:0044763);; Biological Process: regulation of cellular process (GO:0050794);;	K13464|6e-10|vvi:100262641|JAZ;JAZ|hypothetical protein LOC100262641; K13464 jasmonate ZIM domain-containing protein	--	--	Divergent CCT motif;; tify domain	--	protein TIFY 9-like [Helianthus annuus]
Unigene120725	6089.79	785.757	-2.95229	0	0	down	--	--	--	K13464|2e-34|vvi:100254231|JAZ;JAZ|hypothetical protein LOC100254231; K13464 jasmonate ZIM domain-containing protein	--	--	Divergent CCT motif;; tify domain	Protein TIFY 10A OS=Arabidopsis thaliana OX=3702 GN=TIFY10A PE=1 SV=1	protein TIFY 10A-like [Helianthus annuus]
Unigene128365	667.7	0	-9.69846	4.07781e-38	1.44474e-36	down	--	--	--	K13464|4e-18|rcu:RCOM_0684970|JAZ;JAZ|hypothetical protein; K13464 jasmonate ZIM domain-containing protein	--	--	tify domain;; Divergent CCT motif	Protein TIFY 10B OS=Arabidopsis thaliana OX=3702 GN=TIFY10B PE=1 SV=1	protein TIFY 10A-like isoform X1 [Helianthus annuus]
Unigene141248	658.186	303.927	-1.11232	5.22669e-29	1.43512e-27	down	--	--	--	K13464|1e-23|vvi:100262965|JAZ;JAZ|hypothetical protein LOC100262965; K13464 jasmonate ZIM domain-containing protein	--	--	Divergent CCT motif	Protein TIFY 6a OS=Oryza sativa subsp. indica OX=39946 GN=TIFY6A PE=3 SV=1	protein TIFY 6B-like isoform X2 [Lactuca sativa]
Unigene143374	28.3408	0	-5.63872	1.21088e-09	1.30619e-08	down	--	--	Biological Process: response to acid chemical (GO:0001101);; Biological Process: signal transduction (GO:0007165);; Biological Process: response to hormone (GO:0009725);; Biological Process: response to oxygen-containing compound (GO:1901700);;	K13464|3e-12|pop:POPTR_548076|JAZ;JAZ|hypothetical protein; K13464 jasmonate ZIM domain-containing protein	--	--	Divergent CCT motif;; tify domain	Protein TIFY 9 OS=Arabidopsis thaliana OX=3702 GN=TIFY9 PE=1 SV=1	protein TIFY 9-like [Helianthus annuus]
Unigene147847	125.873	1.09307	-6.20099	9.33538e-26	2.29599e-24	down	--	--	--	K13464|1e-16|rcu:RCOM_0710780|JAZ;JAZ|hypothetical protein; K13464 jasmonate ZIM domain-containing protein	--	--	tify domain;; Divergent CCT motif	Protein TIFY 10b OS=Oryza sativa subsp. japonica OX=39947 GN=TIFY10B PE=1 SV=1	protein TIFY 10A-like [Lactuca sativa]
Unigene150414	1328.04	166.478	-2.98696	1.19992e-175	2.3649e-173	down	--	--	Biological Process: transcription, DNA-templated (GO:0006351);; Biological Process: multicellular organism development (GO:0007275);; Biological Process: response to fungus (GO:0009620);; Biological Process: response to abiotic stimulus (GO:0009628);; Biological Process: hormone-mediated signaling pathway (GO:0009755);; Biological Process: salicylic acid mediated signaling pathway (GO:0009863);; …	K13464|2e-12|ath:AT1G19180|JAZ;JAZ|JAZ1; JAZ1 (JASMONATE-ZIM-DOMAIN PROTEIN 1); protein binding; K13464 jasmonate ZIM domain-containing protein	--	--	Divergent CCT motif	Protein TIFY 10A OS=Arabidopsis thaliana OX=3702 GN=TIFY10A PE=1 SV=1	protein TIFY 10A-like [Helianthus annuus]
Unigene161371	284.609	51.5351	-2.44583	9.46055e-43	3.71334e-41	down	--	--	--	K13464|2e-14|rcu:RCOM_0684970|JAZ;JAZ|hypothetical protein; K13464 jasmonate ZIM domain-containing protein	--	--	tify domain	Protein TIFY 11B OS=Arabidopsis thaliana OX=3702 GN=TIFY11B PE=1 SV=1	ZIM-domain protein 6 [Artemisia annua]
Unigene167718	260.716	1.12079	-7.20682	2.36782e-37	8.25699e-36	down	--	--	--	K13464|2e-08|pop:POPTR_548076|JAZ;JAZ|hypothetical protein; K13464 jasmonate ZIM domain-containing protein	--	--	--	--	protein TIFY 9 [Lactuca sativa]
Unigene170918	419.676	102.905	-2.01547	7.39811e-42	2.86519e-40	down	--	--	--	K13464|2e-10|vvi:100262965|JAZ;JAZ|hypothetical protein LOC100262965; K13464 jasmonate ZIM domain-containing protein	--	--	--	--	protein TIFY 3-like isoform X1 [Helianthus annuus]
MYC	Transcription factor MYC2
Unigene175970	4644.61	1286.13	-1.85304	1.84472e-217	4.7829e-215	down	--	--	--	K13422|0.0|vvi:100250607|MYC2;MYC2|similar to MYC transcription factor; K13422 transcription factor MYC2	--	--	bHLH-MYC and R2R3-MYB transcription factors N-terminal;; Helix-loop-helix DNA-binding domain	Transcription factor MYC2 OS=Arabidopsis thaliana OX=3702 GN=MYC2 PE=1 SV=2	transcription factor MYC2 [Cichorium intybus]
Unigene202135	145.769	44.2952	-1.70271	6.58212e-13	9.08049e-12	down	--	--	--	K13422|8e-96|vvi:100246135|MYC2;MYC2|hypothetical protein LOC100246135	--	--	bHLH-MYC and R2R3-MYB transcription factors N-terminal;; Helix-loop-helix DNA-binding domain	Transcription factor bHLH14 OS=Arabidopsis thaliana OX=3702 GN=BHLH14 PE=1 SV=1	transcription factor MYC2-like [Helianthus annuus]
SA
NPR	Ankyrin repeat-containing protein NPR
Unigene035495	17.8009	0.819992	-3.68017	3.28506e-06	2.46489e-05	down	--	--	--	--	[R]	General function prediction only	Domain of unknown function;; Ankyrin repeats (3 copies);; Ankyrin repeats (many copies);; Ankyrin repeats (many copies);; Ankyrin repeat;; Ankyrin repeat	Ankyrin repeat-containing protein NPR4 OS=Oryza sativa subsp. japonica OX=39947 GN=NPR4 PE=2 SV=1	uncharacterized protein LOC111914144 [Lactuca sativa]
Unigene000985	18.3082	3.18478	-2.27624	0.000657828	0.00330911	down	--	--	--	--	[R]	General function prediction only	Ankyrin repeats (3 copies);; Ankyrin repeats (many copies);; Ankyrin repeat;; Ankyrin repeats (many copies);; Ankyrin repeat;; Domain of unknown function	Ankyrin repeat-containing protein NPR4 OS=Oryza sativa subsp. japonica OX=39947 GN=NPR4 PE=2 SV=1	protein ACCELERATED CELL DEATH 6-like [Lactuca sativa]
Unigene105961	4.12314	0	-2.89767	0.00805911	0.029696	down	--	--	--	--	[R]	General function prediction only	Domain of unknown function	Ankyrin repeat-containing protein NPR4 OS=Oryza sativa subsp. japonica OX=39947 GN=NPR4 PE=2 SV=1	Ankyrin repeat-containing protein [Cynara cardunculus var. scolymus]
Unigene052350	39.8048	13.1602	-1.53785	0.000232978	0.00129362	down	--	--	--	--	[R]	General function prediction only	Domain of unknown function	Ankyrin repeat-containing protein NPR4 OS=Oryza sativa subsp. japonica OX=39947 GN=NPR4 PE=2 SV=1	ankyrin repeat-containing protein ITN1-like [Lactuca sativa]
Unigene086063	10.0648	25.5832	1.26917	0.00903023	0.0327148	up	--	--	--	--	[R]	General function prediction only	Domain of unknown function	Ankyrin repeat-containing protein NPR4 OS=Oryza sativa subsp. japonica OX=39947 GN=NPR4 PE=2 SV=1	uncharacterized protein LOC110937942 [Helianthus annuus]
TGA	Transcription factor TGA
Unigene113366	174.6	393.292	1.1708	2.44477e-18	4.48846e-17	up	--	--	Molecular Function: DNA-binding transcription factor activity (GO:0003700);; Biological Process: regulation of transcription, DNA-templated (GO:0006355);; Molecular Function: sequence-specific DNA binding (GO:0043565);;	K14431|0.0|pop:POPTR_1085955|TGA;TGA|hypothetical protein; K14431 transcription factor TGA	--	--	Seed dormancy control;; bZIP transcription factor;; Basic region leucine zipper	Transcription factor TGA9 OS=Arabidopsis thaliana OX=3702 GN=TGA9 PE=1 SV=1	transcription factor TGA9-like isoform X1 [Helianthus annuus]
Unigene185030	29.7486	106.489	1.80717	1.19899e-10	1.40362e-09	up	--	--	--	K14431|4e-37|vvi:100255706|TGA;TGA|hypothetical protein LOC100255706; K14431 transcription factor TGA	--	--	bZIP transcription factor;; Basic region leucine zipper	Transcription factor TGA1 OS=Arabidopsis thaliana OX=3702 GN=TGA1 PE=1 SV=2	transcription factor TGA4-like [Helianthus annuus]
Unigene036386	203.353	420.636	1.04394	6.02462e-16	9.86468e-15	up	--	--	Biological Process: transcription, DNA-templated (GO:0006351);;	K14431|0.0|pop:POPTR_1085955|TGA;TGA|hypothetical protein; K14431 transcription factor TGA	--	--	Seed dormancy control;; bZIP transcription factor;; Basic region leucine zipper	Transcription factor TGA9 OS=Arabidopsis thaliana OX=3702 GN=TGA9 PE=1 SV=1	transcription factor TGA9-like isoform X1 [Helianthus annuus]
Unigene048975	84.8812	259.724	1.60571	1.14453e-18	2.13631e-17	up	--	--	Molecular Function: DNA-binding transcription factor activity (GO:0003700);; Biological Process: regulation of transcription, DNA-templated (GO:0006355);; Molecular Function: sequence-specific DNA binding (GO:0043565);;	K14431|1e-107|vvi:100255706|TGA;TGA|hypothetical protein LOC100255706; K14431 transcription factor TGA	--	--	Seed dormancy control;; bZIP transcription factor;; Basic region leucine zipper	Transcription factor TGA1 OS=Arabidopsis thaliana OX=3702 GN=TGA1 PE=1 SV=2	transcription factor TGA1-like [Lactuca sativa]
Unigene067514	1.91735	21.0743	3.05479	1.52029e-05	0.000104106	up	--	--	--	K14431|1e-08|pop:POPTR_562720|TGA;TGA|hypothetical protein; K14431 transcription factor TGA	--	--	--	Transcription factor TGA1 OS=Arabidopsis thaliana OX=3702 GN=TGA1 PE=1 SV=2	TGACG-sequence-specific DNA-binding protein TGA-1A-like isoform X2 [Lactuca sativa]
Unigene122277	56.4449	158.011	1.47899	7.87494e-11	9.35872e-10	up	--	--	Molecular Function: DNA-binding transcription factor activity (GO:0003700);; Biological Process: regulation of transcription, DNA-templated (GO:0006355);; Molecular Function: sequence-specific DNA binding (GO:0043565);;	K14431|7e-80|vvi:100255706|TGA;TGA|hypothetical protein LOC100255706; K14431 transcription factor TGA	--	--	Seed dormancy control	Transcription factor TGA1 OS=Arabidopsis thaliana OX=3702 GN=TGA1 PE=1 SV=2	transcription factor TGA1-like [Lactuca sativa]
Unigene120941	10.7491	28.0031	1.29685	0.00834138	0.0305912	up	--	--	Biological Process: transcription, DNA-templated (GO:0006351);;	K14431|1e-112|rcu:RCOM_1033270|TGA;TGA|Transcription factor TGA7, putative; K14431 transcription factor TGA	--	--	Seed dormancy control	Transcription factor TGA3 OS=Arabidopsis thaliana OX=3702 GN=TGA3 PE=1 SV=1	transcription factor TGA7-like [Helianthus annuus]
PR-1
Unigene117388	28.8086	7.42142	-1.86649	0.000171813	0.000981052	down	[S]	Function unknown	Cellular Component: extracellular region (GO:0005576);;	--	[S]	Function unknown	Cysteine-rich secretory protein family	Pathogenesis-related protein PR-1 OS=Medicago truncatula OX=3880 GN=PR-1 PE=2 SV=1	pathogenesis-related protein PR-1-like [Helianthus annuus]
Unigene014173	29.9933	8.80075	-1.65624	0.000965741	0.00466813	down	[S]	Function unknown	Cellular Component: extracellular region (GO:0005576);;	--	[S]	Function unknown	Cysteine-rich secretory protein family	Pathogenesis-related protein PR-1 OS=Medicago truncatula OX=3880 GN=PR-1 PE=2 SV=1	pathogenesis-related protein PR-1-like [Lactuca sativa]
Ethylene
SAM
Unigene129221	6997.12	3012.05	-1.2153	5.63953e-204	1.33949e-201	down	--	--	Molecular Function: methionine adenosyltransferase activity (GO:0004478);; Molecular Function: ATP binding (GO:0005524);; Cellular Component: cell wall (GO:0005618);; Cellular Component: nucleolus (GO:0005730);; Cellular Component: cytoplasm (GO:0005737);; Cellular Component: plasma membrane (GO:0005886);; Biological Process: methionine metabolic process (GO:0006555);; Biological Process: S-adeno…	K00789|1e-101|ath:AT3G17390|metK;EC:2.5.1.6|MTO3; MTO3 (METHIONINE OVER-ACCUMULATOR 3); methionine adenosyltransferase (EC:2.5.1.6); K00789 S-adenosylmethionine synthetase [EC:2.5.1.6]	[H]	Coenzyme transport and metabolism	S-adenosylmethionine synthetase, N-terminal domain;; S-adenosylmethionine synthetase, central domain	S-adenosylmethionine synthase 2 OS=Solanum tuberosum OX=4113 GN=METK2 PE=2 SV=1	putative S-adenosyl-L-methionine synthetase, partial [Taraxacum brevicorniculatum]
Unigene148003	4022.18	1468	-1.45263	1.87398e-194	4.21521e-192	down	[H]	Coenzyme transport and metabolism	Molecular Function: methionine adenosyltransferase activity (GO:0004478);; Molecular Function: ATP binding (GO:0005524);; Biological Process: S-adenosylmethionine biosynthetic process (GO:0006556);; Biological Process: one-carbon metabolic process (GO:0006730);; Molecular Function: metal ion binding (GO:0046872);;	K00789|6e-77|ath:AT2G36880|metK;EC:2.5.1.6|MAT3; MAT3 (methionine adenosyltransferase 3); copper ion binding / methionine adenosyltransferase (EC:2.5.1.6); K00789 S-adenosylmethionine synthetase [EC:2.5.1.6]	[H]	Coenzyme transport and metabolism	S-adenosylmethionine synthetase, C-terminal domain	S-adenosylmethionine synthase 1 OS=Nicotiana tabacum OX=4097 GN=SAMS1 PE=2 SV=1	putative S-adenosylmethionine synthetase [Helianthus annuus]
Unigene061754	21497.4	8238.37	-1.38369	0	0	down	[H]	Coenzyme transport and metabolism	Molecular Function: methionine adenosyltransferase activity (GO:0004478);; Molecular Function: ATP binding (GO:0005524);; Cellular Component: cytoplasm (GO:0005737);; Biological Process: S-adenosylmethionine biosynthetic process (GO:0006556);; Biological Process: one-carbon metabolic process (GO:0006730);; Molecular Function: metal ion binding (GO:0046872);;	K00789|1e-100|rcu:RCOM_1354270|metK;EC:2.5.1.6|s-adenosylmethionine synthetase, putative (EC:2.5.1.6); K00789 S-adenosylmethionine synthetase [EC:2.5.1.6]	[H]	Coenzyme transport and metabolism	S-adenosylmethionine synthetase, C-terminal domain	S-adenosylmethionine synthase 2 OS=Solanum tuberosum OX=4113 GN=METK2 PE=2 SV=1	putative S-adenosyl-L-methionine synthetase, partial [Taraxacum brevicorniculatum]
Unigene064646	465.41	230.392	-1.00831	5.93708e-15	9.24873e-14	down	[H]	Coenzyme transport and metabolism	Molecular Function: methionine adenosyltransferase activity (GO:0004478);; Molecular Function: ATP binding (GO:0005524);; Cellular Component: cytoplasm (GO:0005737);; Biological Process: S-adenosylmethionine biosynthetic process (GO:0006556);; Biological Process: one-carbon metabolic process (GO:0006730);; Molecular Function: metal ion binding (GO:0046872);;	K00789|5e-68|vvi:100245243|metK;EC:2.5.1.6|METK3; S-adenosylmethionine synthetase 3; K00789 S-adenosylmethionine synthetase [EC:2.5.1.6]	[H]	Coenzyme transport and metabolism	S-adenosylmethionine synthetase, central domain;; S-adenosylmethionine synthetase, N-terminal domain	S-adenosylmethionine synthase 2 OS=Solanum tuberosum OX=4113 GN=METK2 PE=2 SV=1	putative S-adenosyl-L-methionine synthetase, partial [Taraxacum brevicorniculatum]
Unigene000129	9.07482	41.1367	2.08865	2.75009e-06	2.08404e-05	up	--	--	--	K00789|1e-06|ppp:PHYPADRAFT_187695|metK;EC:2.5.1.6|hypothetical protein	[H]	Coenzyme transport and metabolism	--	S-adenosylmethionine synthase 4 OS=Brassica juncea OX=3707 GN=MSAMS4 PE=2 SV=1	--
Unigene141724	2859.08	1295.86	-1.13975	2.50793e-81	1.90991e-79	down	[H]	Coenzyme transport and metabolism	Molecular Function: methionine adenosyltransferase activity (GO:0004478);; Molecular Function: ATP binding (GO:0005524);; Cellular Component: cytoplasm (GO:0005737);; Biological Process: S-adenosylmethionine biosynthetic process (GO:0006556);; Biological Process: one-carbon metabolic process (GO:0006730);; Molecular Function: metal ion binding (GO:0046872);;	K00789|6e-46|rcu:RCOM_1354270|metK;EC:2.5.1.6|s-adenosylmethionine synthetase, putative (EC:2.5.1.6); K00789 S-adenosylmethionine synthetase [EC:2.5.1.6]	[H]	Coenzyme transport and metabolism	S-adenosylmethionine synthetase, C-terminal domain	S-adenosylmethionine synthase 3 OS=Solanum lycopersicum OX=4081 GN=SAM3 PE=2 SV=1	S-adenosylmethionine synthase 3 [Capsicum annuum]
Unigene026047	2017.7	948.949	-1.08663	4.18188e-61	2.37786e-59	down	--	--	Molecular Function: methionine adenosyltransferase activity (GO:0004478);; Molecular Function: ATP binding (GO:0005524);; Biological Process: S-adenosylmethionine biosynthetic process (GO:0006556);;	K00789|4e-32|ppp:PHYPADRAFT_187695|metK;EC:2.5.1.6|hypothetical protein	[H]	Coenzyme transport and metabolism	S-adenosylmethionine synthetase, N-terminal domain	S-adenosylmethionine synthase 2 OS=Populus trichocarpa OX=3694 GN=METK2 PE=2 SV=2	S-adenosylmethionine synthase, partial [Nicotiana tabacum]
Unigene060630	1053.48	428.891	-1.27758	1.02214e-06	8.16935e-06	down	--	--	--	K00789|9e-15|rcu:RCOM_1354270|metK;EC:2.5.1.6|s-adenosylmethionine synthetase, putative (EC:2.5.1.6); K00789 S-adenosylmethionine synthetase [EC:2.5.1.6]	[H]	Coenzyme transport and metabolism	--	S-adenosylmethionine synthase 3 OS=Solanum lycopersicum OX=4081 GN=SAM3 PE=2 SV=1	S-adenosylmethionine synthase 3-like [Helianthus annuus]
ACO
Unigene049605	4643.97	1021.75	-2.18302	0	0	down	--	--	Molecular Function: oxidoreductase activity, acting on paired donors, with incorporation or reduction of molecular oxygen, 2-oxoglutarate as one donor, and incorporation of one atom each of oxygen into both donors (GO:0016706);; Molecular Function: metal ion binding (GO:0046872);; Biological Process: oxidation-reduction process (GO:0055114);;	K05933|2e-82|vvi:100232928|E1.14.17.4;EC:1.14.17.4|ACO1; 1-aminocyclopropane-1-carboxylic acid oxidase 1; K05933 aminocyclopropanecarboxylate oxidase [EC:1.14.17.4]	[QR]	--	--	1-aminocyclopropane-1-carboxylate oxidase 3 OS=Petunia hybrida OX=4102 GN=ACO3 PE=3 SV=1	1-aminocyclopropapne-1-carboxylic acid oxidase [Helianthus annuus]
Unigene187657	1922.83	274.766	-2.7987	1.53664e-217	3.99429e-215	down	--	--	Biological Process: ethylene biosynthetic process (GO:0009693);; Molecular Function: 1-aminocyclopropane-1-carboxylate oxidase activity (GO:0009815);; Biological Process: fruit ripening (GO:0009835);; Molecular Function: oxidoreductase activity, acting on paired donors, with incorporation or reduction of molecular oxygen, 2-oxoglutarate as one donor, and incorporation of one atom each of oxygen i…	K05933|1e-36|vvi:100256784|E1.14.17.4;EC:1.14.17.4|hypothetical protein LOC100256784; K05933 aminocyclopropanecarboxylate oxidase [EC:1.14.17.4]	[QR]	--	--	1-aminocyclopropane-1-carboxylate oxidase OS=Diospyros kaki OX=35925 GN=DK-ACO1 PE=2 SV=1	1-aminocyclopropane-1-carboxylate oxidase 3 [Helianthus annuus]
Unigene021606	103.391	38.7562	-1.3934	5.93052e-08	5.46523e-07	down	--	--	Molecular Function: iron ion binding (GO:0005506);; Molecular Function: desacetoxyvindoline 4-hydroxylase activity (GO:0050590);; Biological Process: oxidation-reduction process (GO:0055114);;	--	[QR]	--	--	1-aminocyclopropane-1-carboxylate oxidase homolog 3 OS=Arabidopsis thaliana OX=3702 GN=At1g06650 PE=2 SV=1	1-aminocyclopropane-1-carboxylate oxidase homolog 1-like [Lactuca sativa]
Unigene120618	88.5971	26.1575	-1.7335	2.20517e-09	2.32315e-08	down	[R]	General function prediction only	Molecular Function: oxidoreductase activity, acting on paired donors, with incorporation or reduction of molecular oxygen, 2-oxoglutarate as one donor, and incorporation of one atom each of oxygen into both donors (GO:0016706);; Molecular Function: metal ion binding (GO:0046872);; Biological Process: oxidation-reduction process (GO:0055114);;	--	[QR]	--	2OG-Fe(II) oxygenase superfamily	1-aminocyclopropane-1-carboxylate oxidase homolog 6 OS=Arabidopsis thaliana OX=3702 GN=At1g04350 PE=2 SV=1	uncharacterized protein LOC110932635 [Helianthus annuus]
Unigene125957	54.8902	15.8947	-1.74815	1.05078e-06	8.38702e-06	down	[R]	General function prediction only	--	--	[QR]	--	2OG-Fe(II) oxygenase superfamily;; non-haem dioxygenase in morphine synthesis N-terminal	1-aminocyclopropane-1-carboxylate oxidase homolog 11 OS=Arabidopsis thaliana OX=3702 GN=At5g59530 PE=2 SV=1	putative 2-oxoglutarate (2OG) and Fe(II)-dependent oxygenase superfamily protein [Helianthus annuus]
Unigene082058	9.71373	27.0472	1.40131	0.00889298	0.032291	up	--	--	Molecular Function: oxidoreductase activity, acting on paired donors, with incorporation or reduction of molecular oxygen, 2-oxoglutarate as one donor, and incorporation of one atom each of oxygen into both donors (GO:0016706);; Molecular Function: metal ion binding (GO:0046872);; Biological Process: oxidation-reduction process (GO:0055114);;	--	[QR]	--	--	1-aminocyclopropane-1-carboxylate oxidase homolog 3 OS=Arabidopsis thaliana OX=3702 GN=At1g06650 PE=2 SV=1	uncharacterized protein LOC110932635 [Helianthus annuus]
Unigene043177	294.291	136.378	-1.10685	4.35607e-14	6.47029e-13	down	[R]	General function prediction only	Molecular Function: oxidoreductase activity, acting on paired donors, with incorporation or reduction of molecular oxygen, 2-oxoglutarate as one donor, and incorporation of one atom each of oxygen into both donors (GO:0016706);; Molecular Function: metal ion binding (GO:0046872);; Biological Process: oxidation-reduction process (GO:0055114);;	--	[QR]	--	2OG-Fe(II) oxygenase superfamily;; non-haem dioxygenase in morphine synthesis N-terminal	1-aminocyclopropane-1-carboxylate oxidase homolog 6 OS=Arabidopsis thaliana OX=3702 GN=At1g04350 PE=2 SV=1	ACO1 [Carthamus tinctorius]
Unigene063309	61.1834	29.5191	-1.02494	0.0011614	0.00550575	down	[R]	General function prediction only	--	--	[QR]	--	2OG-Fe(II) oxygenase superfamily	1-aminocyclopropane-1-carboxylate oxidase homolog 1 OS=Arabidopsis thaliana OX=3702 GN=At1g06620 PE=2 SV=1	1-aminocyclopropane-1-carboxylate oxidase homolog 3-like [Helianthus annuus]
Unigene178630	2023.04	351.562	-2.51895	1.01421e-232	2.94424e-230	down	[R]	General function prediction only	Biological Process: ethylene biosynthetic process (GO:0009693);; Molecular Function: 1-aminocyclopropane-1-carboxylate oxidase activity (GO:0009815);; Biological Process: fruit ripening (GO:0009835);; Molecular Function: oxidoreductase activity, acting on paired donors, with incorporation or reduction of molecular oxygen, 2-oxoglutarate as one donor, and incorporation of one atom each of oxygen i…	K05933|1e-140|vvi:100256784|E1.14.17.4;EC:1.14.17.4|hypothetical protein LOC100256784; K05933 aminocyclopropanecarboxylate oxidase [EC:1.14.17.4]	[QR]	--	2OG-Fe(II) oxygenase superfamily;; non-haem dioxygenase in morphine synthesis N-terminal	1-aminocyclopropane-1-carboxylate oxidase 3 OS=Petunia hybrida OX=4102 GN=ACO3 PE=3 SV=1	putative oxoglutarate/iron-dependent dioxygenase [Helianthus annuus]
Unigene018387	1061.95	177.541	-2.57826	3.68921e-150	5.9954e-148	down	[R]	General function prediction only	Molecular Function: oxidoreductase activity, acting on paired donors, with incorporation or reduction of molecular oxygen, 2-oxoglutarate as one donor, and incorporation of one atom each of oxygen into both donors (GO:0016706);; Molecular Function: metal ion binding (GO:0046872);; Biological Process: oxidation-reduction process (GO:0055114);;	K05933|1e-119|pop:POPTR_568162|E1.14.17.4;EC:1.14.17.4|ACO7; 1-aminocyclopropane-1-carboxylate (EC:1.14.11.9); K05933 aminocyclopropanecarboxylate oxidase [EC:1.14.17.4]	[QR]	--	2OG-Fe(II) oxygenase superfamily;; non-haem dioxygenase in morphine synthesis N-terminal	1-aminocyclopropane-1-carboxylate oxidase OS=Actinidia deliciosa OX=3627 GN=ACO PE=2 SV=1	1-aminocyclopropane-1-carboxylate oxidase-like [Helianthus annuus]
Unigene049835	133.332	1.1616	-6.27193	2.56779e-26	6.44764e-25	down	[R]	General function prediction only	Biological Process: defense response (GO:0006952);; Biological Process: ethylene biosynthetic process (GO:0009693);; Molecular Function: 1-aminocyclopropane-1-carboxylate oxidase activity (GO:0009815);; Biological Process: xylem development (GO:0010089);; Molecular Function: oxidoreductase activity, acting on paired donors, with incorporation or reduction of molecular oxygen, 2-oxoglutarate as on…	K05933|1e-180|vvi:100257676|E1.14.17.4;EC:1.14.17.4|hypothetical protein LOC100257676; K05933 aminocyclopropanecarboxylate oxidase [EC:1.14.17.4]	[QR]	--	2OG-Fe(II) oxygenase superfamily;; non-haem dioxygenase in morphine synthesis N-terminal	1-aminocyclopropane-1-carboxylate oxidase 1 OS=Arabidopsis thaliana OX=3702 GN=ACO1 PE=2 SV=1	1-aminocyclopropane-1-carboxylate oxidase 1 [Lactuca sativa]
Unigene008931	257.15	0	-8.48618	8.18176e-27	2.08733e-25	down	[R]	General function prediction only	Molecular Function: iron ion binding (GO:0005506);; Biological Process: ethylene biosynthetic process (GO:0009693);; Molecular Function: 1-aminocyclopropane-1-carboxylate oxidase activity (GO:0009815);; Molecular Function: oxidoreductase activity, acting on paired donors, with incorporation or reduction of molecular oxygen, 2-oxoglutarate as one donor, and incorporation of one atom each of oxygen…	K05933|0.0|vvi:100256784|E1.14.17.4;EC:1.14.17.4|hypothetical protein LOC100256784; K05933 aminocyclopropanecarboxylate oxidase [EC:1.14.17.4]	[QR]	--	2OG-Fe(II) oxygenase superfamily;; non-haem dioxygenase in morphine synthesis N-terminal	1-aminocyclopropane-1-carboxylate oxidase 3 OS=Petunia hybrida OX=4102 GN=ACO3 PE=3 SV=1	1-aminocyclopropane-1-carboxylate oxidase 3-like [Lactuca sativa]
Unigene013702	245.665	85.3462	-1.51803	5.99095e-19	1.13593e-17	down	[R]	General function prediction only	--	--	[QR]	--	non-haem dioxygenase in morphine synthesis N-terminal	1-aminocyclopropane-1-carboxylate oxidase homolog OS=Solanum lycopersicum OX=4081 GN=ACO3 PE=2 SV=1	hypothetical protein LSAT_3X121680 [Lactuca sativa]
Unigene094765	89.3703	37.1712	-1.24596	4.84257e-06	3.55116e-05	down	[R]	General function prediction only	--	--	[QR]	--	non-haem dioxygenase in morphine synthesis N-terminal	1-aminocyclopropane-1-carboxylate oxidase homolog OS=Solanum lycopersicum OX=4081 GN=ACO3 PE=2 SV=1	1-aminocyclopropane-1-carboxylate oxidase homolog 1-like [Helianthus annuus]
Unigene060810	1687.22	232.977	-2.84769	2.79236e-230	7.94771e-228	down	--	--	Biological Process: ethylene biosynthetic process (GO:0009693);; Molecular Function: 1-aminocyclopropane-1-carboxylate oxidase activity (GO:0009815);; Biological Process: fruit ripening (GO:0009835);; Molecular Function: oxidoreductase activity, acting on paired donors, with incorporation or reduction of molecular oxygen, 2-oxoglutarate as one donor, and incorporation of one atom each of oxygen i…	K05933|1e-42|vvi:100256784|E1.14.17.4;EC:1.14.17.4|hypothetical protein LOC100256784; K05933 aminocyclopropanecarboxylate oxidase [EC:1.14.17.4]	[QR]	--	--	1-aminocyclopropane-1-carboxylate oxidase OS=Diospyros kaki OX=35925 GN=DK-ACO1 PE=2 SV=1	Non-heme dioxygenase N-terminal domain-containing protein [Cynara cardunculus var. scolymus]
Unigene055737	336.572	139.591	-1.26703	1.464e-18	2.72068e-17	down	[R]	General function prediction only	--	--	[QR]	--	2OG-Fe(II) oxygenase superfamily	1-aminocyclopropane-1-carboxylate oxidase homolog 6 OS=Arabidopsis thaliana OX=3702 GN=At1g04350 PE=2 SV=1	uncharacterized protein LOC110932635 [Helianthus annuus]
Unigene103864	411.351	95.5693	-2.09634	4.49783e-49	2.01986e-47	down	[R]	General function prediction only	Molecular Function: 1-aminocyclopropane-1-carboxylate oxidase activity (GO:0009815);; Molecular Function: oxidoreductase activity, acting on paired donors, with incorporation or reduction of molecular oxygen, 2-oxoglutarate as one donor, and incorporation of one atom each of oxygen into both donors (GO:0016706);; Molecular Function: metal ion binding (GO:0046872);; Biological Process: oxidation-r…	K05933|4e-63|rcu:RCOM_2065200|E1.14.17.4;EC:1.14.17.4|1-aminocyclopropane-1-carboxylate oxidase, putative (EC:1.14.17.4); K05933 aminocyclopropanecarboxylate oxidase [EC:1.14.17.4]	[QR]	--	2OG-Fe(II) oxygenase superfamily;; non-haem dioxygenase in morphine synthesis N-terminal	1-aminocyclopropane-1-carboxylate oxidase 4 OS=Petunia hybrida OX=4102 GN=ACO4 PE=3 SV=1	1-aminocyclopropane-q-carboxylate oxidase [Chrysanthemum x morifolium]
Unigene064913	245.419	87.8324	-1.47102	1.66216e-18	3.07769e-17	down	[R]	General function prediction only	--	--	[QR]	--	2OG-Fe(II) oxygenase superfamily	1-aminocyclopropane-1-carboxylate oxidase homolog 3 OS=Arabidopsis thaliana OX=3702 GN=At1g06650 PE=2 SV=1	1-aminocyclopropane-1-carboxylate oxidase homolog 1-like [Lactuca sativa]
ETR
Unigene012949	2184.73	507.288	-2.10615	4.13449e-221	1.10284e-218	down	[T]	Signal transduction mechanisms	Molecular Function: phosphorelay sensor kinase activity (GO:0000155);; Cellular Component: endoplasmic reticulum membrane (GO:0005789);; Biological Process: ethylene-activated signaling pathway (GO:0009873);; Biological Process: peptidyl-histidine phosphorylation (GO:0018106);; Biological Process: signal transduction by protein phosphorylation (GO:0023014);;	K14509|0.0|vvi:100254638|ETR, ERS;EC:2.7.13.-|hypothetical protein LOC100254638; K14509 ethylene receptor [EC:2.7.13.-]	[T]	Signal transduction mechanisms	GAF domain;; His Kinase A (phospho-acceptor) domain;; Response regulator receiver domain	Ethylene receptor 2 OS=Arabidopsis thaliana OX=3702 GN=ETR2 PE=1 SV=2	ethylene receptor 2-like [Helianthus annuus]
Unigene047822	1731.28	651.942	-1.4074	3.45939e-96	3.23094e-94	down	[T]	Signal transduction mechanisms	Molecular Function: phosphorelay sensor kinase activity (GO:0000155);; Cellular Component: endoplasmic reticulum membrane (GO:0005789);; Biological Process: ethylene-activated signaling pathway (GO:0009873);; Biological Process: peptidyl-histidine phosphorylation (GO:0018106);; Biological Process: signal transduction by protein phosphorylation (GO:0023014);;	K14509|0.0|vvi:100254638|ETR, ERS;EC:2.7.13.-|hypothetical protein LOC100254638; K14509 ethylene receptor [EC:2.7.13.-]	[T]	Signal transduction mechanisms	GAF domain	Ethylene receptor 2 OS=Arabidopsis thaliana OX=3702 GN=ETR2 PE=1 SV=2	ethylene receptor 2-like [Lactuca sativa]
Unigene194442	1006.12	381.033	-1.39846	1.06326e-59	5.86893e-58	down	[T]	Signal transduction mechanisms	Molecular Function: phosphorelay sensor kinase activity (GO:0000155);; Cellular Component: endoplasmic reticulum membrane (GO:0005789);; Biological Process: ethylene-activated signaling pathway (GO:0009873);; Biological Process: peptidyl-histidine phosphorylation (GO:0018106);; Biological Process: signal transduction by protein phosphorylation (GO:0023014);;	K14509|0.0|vvi:100254638|ETR, ERS;EC:2.7.13.-|hypothetical protein LOC100254638; K14509 ethylene receptor [EC:2.7.13.-]	[T]	Signal transduction mechanisms	GAF domain	Ethylene receptor 2 OS=Arabidopsis thaliana OX=3702 GN=ETR2 PE=1 SV=2	CheY-like superfamily [Cynara cardunculus var. scolymus]
Unigene206184	4.04157	0	-2.81488	0.0105223	0.0372656	down	[T]	Signal transduction mechanisms	Biological Process: phosphorelay signal transduction system (GO:0000160);; Molecular Function: protein histidine kinase activity (GO:0004673);; Molecular Function: obsolete signal transducer activity (GO:0004871);; Molecular Function: signaling receptor activity (GO:0004872);; Molecular Function: binding (GO:0005488);; Cellular Component: membrane (GO:0016020);; Biological Process: phosphorylatio…	K14509|1e-37|vvi:100241730|ETR, ERS;EC:2.7.13.-|hypothetical protein LOC100241730; K14509 ethylene receptor [EC:2.7.13.-]	[T]	Signal transduction mechanisms	Histidine kinase-, DNA gyrase B-, and HSP90-like ATPase	Ethylene receptor OS=Malus domestica OX=3750 GN=ETR1 PE=2 SV=1	ethylene response sensor 1-like [Helianthus annuus]
Unigene151261	205.038	56.54	-1.84698	2.90644e-21	6.09868e-20	down	[T]	Signal transduction mechanisms	Molecular Function: phosphorelay sensor kinase activity (GO:0000155);; Cellular Component: endoplasmic reticulum membrane (GO:0005789);; Biological Process: ethylene-activated signaling pathway (GO:0009873);; Biological Process: peptidyl-histidine phosphorylation (GO:0018106);; Biological Process: signal transduction by protein phosphorylation (GO:0023014);;	K14509|1e-111|vvi:100254638|ETR, ERS;EC:2.7.13.-|hypothetical protein LOC100254638; K14509 ethylene receptor [EC:2.7.13.-]	[T]	Signal transduction mechanisms	--	Ethylene receptor 2 OS=Arabidopsis thaliana OX=3702 GN=ETR2 PE=1 SV=2	ethylene receptor 2-like [Helianthus annuus]
ERS
Unigene044604	1060.72	345.205	-1.61958	8.89515e-72	5.93175e-70	down	[T]	Signal transduction mechanisms	Molecular Function: phosphorelay sensor kinase activity (GO:0000155);; Molecular Function: protein serine/threonine kinase activity (GO:0004674);; Molecular Function: ATP binding (GO:0005524);; Cellular Component: endoplasmic reticulum membrane (GO:0005789);; Biological Process: negative regulation of ethylene-activated signaling pathway (GO:0010105);; Cellular Component: integral component of me…	K14509|0.0|vvi:100241730|ETR, ERS;EC:2.7.13.-|hypothetical protein LOC100241730; K14509 ethylene receptor [EC:2.7.13.-]	[T]	Signal transduction mechanisms	His Kinase A (phospho-acceptor) domain;; GAF domain;; Histidine kinase-, DNA gyrase B-, and HSP90-like ATPase	Probable ethylene response sensor 1 OS=Oryza sativa subsp. japonica OX=39947 GN=ERS1 PE=2 SV=1	hypothetical protein LSAT_8X164760 [Lactuca sativa]
Unigene208365	763.578	219.413	-1.79658	9.22716e-69	5.89099e-67	down	[T]	Signal transduction mechanisms	Molecular Function: phosphorelay sensor kinase activity (GO:0000155);; Molecular Function: protein serine/threonine kinase activity (GO:0004674);; Molecular Function: ATP binding (GO:0005524);; Cellular Component: endoplasmic reticulum membrane (GO:0005789);; Biological Process: negative regulation of ethylene-activated signaling pathway (GO:0010105);; Cellular Component: integral component of me…	K14509|0.0|vvi:100241730|ETR, ERS;EC:2.7.13.-|hypothetical protein LOC100241730; K14509 ethylene receptor [EC:2.7.13.-]	[T]	Signal transduction mechanisms	Histidine kinase-, DNA gyrase B-, and HSP90-like ATPase;; His Kinase A (phospho-acceptor) domain;; GAF domain	Probable ethylene response sensor 1 OS=Oryza sativa subsp. japonica OX=39947 GN=ERS1 PE=2 SV=1	ethylene responsive sensor [Chrysanthemum x morifolium]
Unigene131439	53.2779	1.09307	-4.98574	1.13287e-14	1.73559e-13	down	[T]	Signal transduction mechanisms	Biological Process: phosphorelay signal transduction system (GO:0000160);; Molecular Function: protein histidine kinase activity (GO:0004673);; Molecular Function: obsolete signal transducer activity (GO:0004871);; Molecular Function: signaling receptor activity (GO:0004872);; Molecular Function: binding (GO:0005488);; Cellular Component: membrane (GO:0016020);; Biological Process: phosphorylatio…	K14509|6e-25|vvi:100241730|ETR, ERS;EC:2.7.13.-|hypothetical protein LOC100241730; K14509 ethylene receptor [EC:2.7.13.-]	[T]	Signal transduction mechanisms	Histidine kinase-, DNA gyrase B-, and HSP90-like ATPase	Ethylene response sensor 1 OS=Arabidopsis thaliana OX=3702 GN=ERS1 PE=1 SV=1	ethylene response sensor 1-like [Helianthus annuus]
Unigene086013	724.818	12.3267	-5.57548	1.24422e-29	3.51872e-28	down	[T]	Signal transduction mechanisms	Molecular Function: phosphorelay sensor kinase activity (GO:0000155);; Molecular Function: protein serine/threonine kinase activity (GO:0004674);; Molecular Function: ATP binding (GO:0005524);; Cellular Component: endoplasmic reticulum membrane (GO:0005789);; Biological Process: negative regulation of ethylene-activated signaling pathway (GO:0010105);; Cellular Component: integral component of me…	K14509|0.0|vvi:100241730|ETR, ERS;EC:2.7.13.-|hypothetical protein LOC100241730; K14509 ethylene receptor [EC:2.7.13.-]	[T]	Signal transduction mechanisms	Histidine kinase-, DNA gyrase B-, and HSP90-like ATPase;; His Kinase A (phospho-acceptor) domain;; GAF domain	Probable ethylene response sensor 1 OS=Oryza sativa subsp. japonica OX=39947 GN=ERS1 PE=2 SV=1	ethylene response sensor 1-like [Helianthus annuus]
Unigene138064	152.831	2.02279	-5.89244	3.98346e-31	1.17514e-29	down	[T]	Signal transduction mechanisms	Molecular Function: phosphorelay sensor kinase activity (GO:0000155);; Molecular Function: protein serine/threonine kinase activity (GO:0004674);; Molecular Function: ATP binding (GO:0005524);; Cellular Component: endoplasmic reticulum membrane (GO:0005789);; Biological Process: negative regulation of ethylene-activated signaling pathway (GO:0010105);; Cellular Component: integral component of me…	K14509|0.0|vvi:100241730|ETR, ERS;EC:2.7.13.-|hypothetical protein LOC100241730; K14509 ethylene receptor [EC:2.7.13.-]	[T]	Signal transduction mechanisms	His Kinase A (phospho-acceptor) domain;; GAF domain	Probable ethylene response sensor 1 OS=Oryza sativa subsp. japonica OX=39947 GN=ERS1 PE=2 SV=1	hypothetical protein LSAT_8X164760 [Lactuca sativa]
EBF
Unigene056199	293.648	740.086	1.32953	5.46835e-36	1.83772e-34	up	--	--	--	K14515|0.0|pop:POPTR_561896|EBF1_2;EBF1_2|EBF3; ein3-binding f-box protein 3; K14515 EIN3-binding F-box protein	[R]	General function prediction only	Leucine Rich repeats (2 copies);; Leucine Rich repeat;; F-box-like;; F-box domain	EIN3-binding F-box protein 1 OS=Arabidopsis thaliana OX=3702 GN=EBF1 PE=1 SV=1	EIN3-binding F-box protein 1 [Helianthus annuus]
Unigene124388	921.41	303.985	-1.59841	2.70556e-69	1.73714e-67	down	--	--	--	--	[R]	General function prediction only	Leucine Rich repeat;; Leucine Rich repeats (2 copies);; F-box domain	EIN3-binding F-box protein 2 OS=Arabidopsis thaliana OX=3702 GN=EBF2 PE=1 SV=1	EIN3-binding F-box protein 2-like isoform X1 [Helianthus annuus]
Unigene126766	261.326	709.721	1.43598	1.48355e-36	5.05066e-35	up	--	--	--	K14515|0.0|pop:POPTR_561896|EBF1_2;EBF1_2|EBF3; ein3-binding f-box protein 3; K14515 EIN3-binding F-box protein	[R]	General function prediction only	Leucine Rich repeats (2 copies);; Leucine Rich repeat;; F-box-like;; F-box domain	EIN3-binding F-box protein 1 OS=Arabidopsis thaliana OX=3702 GN=EBF1 PE=1 SV=1	EIN3-binding F-box protein 1 [Helianthus annuus]
Unigene062665	526.456	205.944	-1.35234	6.05033e-29	1.65592e-27	down	--	--	--	--	[R]	General function prediction only	Leucine Rich repeats (2 copies);; Leucine Rich repeat;; F-box domain	EIN3-binding F-box protein 2 OS=Arabidopsis thaliana OX=3702 GN=EBF2 PE=1 SV=1	EIN3-binding F-box protein 2-like isoform X1 [Helianthus annuus]
Unigene200966	38.4315	5.09784	-2.76668	1.67639e-08	1.63288e-07	down	--	--	--	--	[R]	General function prediction only	Leucine Rich repeat;; Leucine Rich repeats (2 copies);; F-box domain	EIN3-binding F-box protein 2 OS=Arabidopsis thaliana OX=3702 GN=EBF2 PE=1 SV=1	EIN3-binding F-box protein 2-like [Helianthus annuus]
Unigene024073	13.2427	31.9112	1.23011	0.0072482	0.0271518	up	--	--	--	--	[R]	General function prediction only	--	EIN3-binding F-box protein 1 OS=Arabidopsis thaliana OX=3702 GN=EBF1 PE=1 SV=1	EIN3-binding F-box protein 2-like isoform X2 [Helianthus annuus]
Unigene036055	73.4812	11.2209	-2.6479	2.2512e-12	3.00048e-11	down	--	--	--	--	[R]	General function prediction only	Leucine Rich repeat;; Leucine Rich repeats (2 copies)	EIN3-binding F-box protein 2 OS=Arabidopsis thaliana OX=3702 GN=EBF2 PE=1 SV=1	EIN3-binding F-box protein 2-like [Helianthus annuus]
Unigene049253	530.318	143.633	-1.87862	1.20409e-53	5.92995e-52	down	--	--	--	--	[R]	General function prediction only	Leucine Rich repeat	EIN3-binding F-box protein 2 OS=Arabidopsis thaliana OX=3702 GN=EBF2 PE=1 SV=1	EIN3-binding F-box protein 2-like isoform X2 [Helianthus annuus]
ERF1
Unigene185823	121.958	0.587731	-6.69973	5.85008e-23	1.29783e-21	down	--	--	--	--	--	--	AP2 domain	Ethylene-responsive transcription factor 1 OS=Nicotiana tabacum OX=4097 GN=ERF1 PE=2 SV=1	AP2/ERF domain-containing protein [Cynara cardunculus var. scolymus]
ERF2
Unigene092904	85.2594	0	-7.07716	8.52312e-17	1.45666e-15	down	--	--	--	--	--	--	AP2 domain	Ethylene-responsive transcription factor 2 OS=Arabidopsis thaliana OX=3702 GN=ERF2 PE=2 SV=1	ethylene-responsive transcription factor ERF115-like [Helianthus annuus]
Unigene072580	6528.69	2415.25	-1.43426	9.22094e-257	3.07048e-254	down	--	--	Molecular Function: DNA binding (GO:0003677);; Molecular Function: DNA-binding transcription factor activity (GO:0003700);; Cellular Component: nucleus (GO:0005634);; Biological Process: regulation of transcription, DNA-templated (GO:0006355);; Biological Process: biological_process (GO:0044699);; Biological Process: response to stimulus (GO:0050896);;	--	--	--	AP2 domain	Ethylene-responsive transcription factor 2 OS=Nicotiana sylvestris OX=4096 GN=ERF2 PE=2 SV=1	AP2/ERF transcription factor [Artemisia annua]
Unigene074368	635.932	37.0768	-4.08193	1.81496e-130	2.49575e-128	down	--	--	Molecular Function: DNA binding (GO:0003677);; Molecular Function: DNA-binding transcription factor activity (GO:0003700);; Cellular Component: nucleus (GO:0005634);; Biological Process: regulation of transcription, DNA-templated (GO:0006355);;	--	--	--	AP2 domain	Ethylene-responsive transcription factor 2 OS=Nicotiana tabacum OX=4097 GN=ERF2 PE=2 SV=1	hypothetical protein LSAT_4X46601 [Lactuca sativa]
Unigene134075	271.133	14.5559	-4.17854	4.66868e-61	2.6517e-59	down	--	--	Molecular Function: DNA binding (GO:0003677);; Molecular Function: DNA-binding transcription factor activity (GO:0003700);; Cellular Component: nucleus (GO:0005634);; Biological Process: regulation of transcription, DNA-templated (GO:0006355);;	--	--	--	AP2 domain	Ethylene-responsive transcription factor 2 OS=Nicotiana tabacum OX=4097 GN=ERF2 PE=2 SV=1	hypothetical protein LSAT_4X46601 [Lactuca sativa]

## Sheet: Table S10
Table S10 KEGG enrichment of DEGs pathway “Starch and sucrose metabolism” pathway (ko00500) in phloem
#id	baseMeanA	baseMeanB	log2(YZT2-CK-P/T1-14-CK-P)	pvalue	padj	regulated	COG_class	COG_class_annotation	GO_annotation	KEGG_annotation	KOG_class	KOG_class_annotation	Pfam_annotation	Swissprot_annotation	nr_annotation
Unigene000281	6.20064	23.9499	1.87032	0.000534257	0.00145568	up	--	--	Biological Process: metabolic process (GO:0008152);; Molecular Function: hydrolase activity, acting on ester bonds (GO:0016788);;	K01051|0.0|rcu:RCOM_1179070|E3.1.1.11;EC:3.1.1.11|Pectinesterase-3 precursor, putative (EC:3.1.1.11); K01051 pectinesterase [EC:3.1.1.11]	--	--	Pectinesterase;; Plant invertase/pectin methylesterase inhibitor	Pectinesterase OS=Actinidia deliciosa OX=3627 PE=1 SV=1	pectinesterase-like [Lactuca sativa]
Unigene000363	4.45299	53.7665	3.49764	7.01207e-13	6.36472e-12	up	--	--	--	K05349|3e-11|vvi:100255282|bglX;EC:3.2.1.21|hypothetical protein LOC100255282; K01188 beta-glucosidase [EC:3.2.1.21]	--	--	--	--	uncharacterized protein LOC110868602 [Helianthus annuus]
Unigene001713	0	41.9577	6.49613	3.03239e-10	2.08397e-09	up	--	--	--	K13648|5e-14|vvi:100252372|GAUT;EC:2.4.1.43|similar to GAUT1/LGT1 (Galacturonosyltransferase 1); polygalacturonate 4-alpha-galacturonosyltransferase/ transferase, transferring glycosyl groups; K13648 alpha-1,4-galacturonosyltransferase [EC:2.4.1.43]	--	--	--	Polygalacturonate 4-alpha-galacturonosyltransferase OS=Arabidopsis thaliana OX=3702 GN=GAUT1 PE=1 SV=1	polygalacturonate 4-alpha-galacturonosyltransferase-like [Lactuca sativa]
Unigene001999	5.86187	46.37	2.90902	1.06797e-10	7.73725e-10	up	[MG]	--	Biological Process: carbohydrate metabolic process (GO:0005975);; Cellular Component: integral component of membrane (GO:0016021);; Cellular Component: Golgi cisterna membrane (GO:0032580);; Biological Process: cellular metabolic process (GO:0044237);; Molecular Function: UDP-glucuronate 4-epimerase activity (GO:0050378);; Molecular Function: coenzyme binding (GO:0050662);;	K08679|1e-127|ath:AT4G00110|E5.1.3.6;EC:5.1.3.6|GAE3; GAE3 (UDP-D-GLUCURONATE 4-EPIMERASE 3); UDP-glucuronate 4-epimerase/ catalytic; K08679 UDP-glucuronate 4-epimerase [EC:5.1.3.6]	[M]	Cell wall/membrane/envelope biogenesis	NAD dependent epimerase/dehydratase family;; GDP-mannose 4,6 dehydratase;; RmlD substrate binding domain;; 3-beta hydroxysteroid dehydrogenase/isomerase family;; Polysaccharide biosynthesis protein;; Male sterility protein	UDP-glucuronate 4-epimerase 3 OS=Arabidopsis thaliana OX=3702 GN=GAE3 PE=2 SV=1	UDP-glucuronate 4-epimerase 3-like [Helianthus annuus]
Unigene002596	3.2904	15.2575	2.08735	0.00132486	0.00333247	up	--	--	Cellular Component: Golgi apparatus (GO:0005794);; Biological Process: metabolic process (GO:0008152);; Cellular Component: membrane (GO:0016020);; Molecular Function: transferase activity, transferring glycosyl groups (GO:0016757);;	K13648|4e-12|vvi:100262181|GAUT;EC:2.4.1.43|hypothetical protein LOC100262181; K13648 alpha-1,4-galacturonosyltransferase [EC:2.4.1.43]	--	--	--	--	Glycosyl transferase, family 8 [Cynara cardunculus var. scolymus]
Unigene002917	2.89367	48.4955	3.89157	1.12423e-12	9.9983e-12	up	[G]	Carbohydrate transport and metabolism	--	K05350|5e-21|vvi:100267558|bglB;EC:3.2.1.21|hypothetical protein LOC100267558	[G]	Carbohydrate transport and metabolism	--	Probable inactive beta-glucosidase 14 OS=Oryza sativa subsp. japonica OX=39947 GN=BGLU14 PE=2 SV=2	putative glycoside hydrolase family 1 [Helianthus annuus]
Unigene003578	0	20.719	5.56707	1.51593e-07	7.40869e-07	up	[MG]	--	Biological Process: carbohydrate metabolic process (GO:0005975);; Molecular Function: racemase and epimerase activity, acting on carbohydrates and derivatives (GO:0016857);; Molecular Function: coenzyme binding (GO:0050662);;	K08679|4e-59|pop:POPTR_578682|E5.1.3.6;EC:5.1.3.6|hypothetical protein; K08679 UDP-glucuronate 4-epimerase [EC:5.1.3.6]	[M]	Cell wall/membrane/envelope biogenesis	NAD dependent epimerase/dehydratase family	UDP-glucuronate 4-epimerase 1 OS=Arabidopsis thaliana OX=3702 GN=GAE1 PE=1 SV=1	UDP-glucuronate 4-epimerase 1-like [Lactuca sativa]
Unigene004368	2.51212	46.4404	3.99848	3.5049e-12	2.96955e-11	up	--	--	Molecular Function: enzyme inhibitor activity (GO:0004857);; Cellular Component: cell wall (GO:0005618);; Molecular Function: pectinesterase activity (GO:0030599);; Biological Process: cell wall modification (GO:0042545);; Biological Process: negative regulation of catalytic activity (GO:0043086);; Molecular Function: aspartyl esterase activity (GO:0045330);; Biological Process: pectin catabolic …	K01051|0.0|vvi:100254501|E3.1.1.11;EC:3.1.1.11|hypothetical protein LOC100254501; K01051 pectinesterase [EC:3.1.1.11]	--	--	Pectinesterase;; Plant invertase/pectin methylesterase inhibitor	Putative pectinesterase/pectinesterase inhibitor 22 OS=Arabidopsis thaliana OX=3702 GN=PME22 PE=3 SV=1	putative pectinesterase/pectinesterase inhibitor 22 [Helianthus annuus]
Unigene004911	1003.29	391.542	-1.35595	9.01308e-64	7.01742e-62	down	[P]	Inorganic ion transport and metabolism	Biological Process: polysaccharide catabolic process (GO:0000272);; Molecular Function: beta-amylase activity (GO:0016161);;	K01177|1e-156|ath:AT3G23920|E3.2.1.2;EC:3.2.1.2|BAM1; BAM1 (BETA-AMYLASE 1); beta-amylase (EC:3.2.1.2)	--	--	Glycosyl hydrolase family 14;; Glycosyl hydrolase family 14;; Glycosyl hydrolase family 14;; Glycosyl hydrolase family 14	Beta-amylase 1, chloroplastic OS=Arabidopsis thaliana OX=3702 GN=BAM1 PE=1 SV=1	beta-amylase 1, chloroplastic [Helianthus annuus]
Unigene005130	31.3054	93.0264	1.5646	8.26061e-10	5.39777e-09	up	[G]	Carbohydrate transport and metabolism	Molecular Function: alpha,alpha-trehalose-phosphate synthase (UDP-forming) activity (GO:0003825);; Biological Process: trehalose biosynthetic process (GO:0005992);;	K00697|0.0|pop:POPTR_828543|otsA;EC:2.4.1.15|trehalose-6-phosphate synthase; K00697 alpha,alpha-trehalose-phosphate synthase (UDP-forming) [EC:2.4.1.15]	[G]	Carbohydrate transport and metabolism	Glycosyltransferase family 20	Alpha,alpha-trehalose-phosphate synthase [UDP-forming] 1 OS=Arabidopsis thaliana OX=3702 GN=TPS1 PE=1 SV=1	putative glycosyl transferase, family 20, Trehalose-phosphatase, HAD-like domain protein [Helianthus annuus]
Unigene006681	13.8088	37.463	1.40868	0.000188775	0.000561431	up	--	--	--	K01194|6e-13|pop:POPTR_817432|TREH, treA, treF;EC:3.2.1.28|alpha,alpha-trehalase (EC:3.2.1.28); K01194 alpha,alpha-trehalase [EC:3.2.1.28]	[G]	Carbohydrate transport and metabolism	--	Trehalase OS=Arabidopsis thaliana OX=3702 GN=TRE1 PE=2 SV=1	probable trehalase [Helianthus annuus]
Unigene007458	11.9659	194.728	3.97133	6.86359e-43	2.87342e-41	up	[G]	Carbohydrate transport and metabolism	Biological Process: carbohydrate metabolic process (GO:0005975);; Molecular Function: glycogen phosphorylase activity (GO:0008184);; Molecular Function: amino acid binding (GO:0016597);; Molecular Function: pyridoxal phosphate binding (GO:0030170);;	K00688|2e-55|vvi:100264186|PYG, glgP;EC:2.4.1.1|hypothetical protein LOC100264186; K00688 starch phosphorylase [EC:2.4.1.1]	[G]	Carbohydrate transport and metabolism	--	Alpha-glucan phosphorylase 2, cytosolic OS=Arabidopsis thaliana OX=3702 GN=PHS2 PE=1 SV=1	glycogen phosphorylase 1-like [Helianthus annuus]
Unigene007740	676.526	1398.28	1.04674	3.99206e-63	3.05539e-61	up	[MG]	--	Cellular Component: endosome (GO:0005768);; Cellular Component: trans-Golgi network (GO:0005802);; Biological Process: carbohydrate metabolic process (GO:0005975);; Biological Process: tryptophan catabolic process (GO:0006569);; Biological Process: indoleacetic acid biosynthetic process (GO:0009684);; Cellular Component: integral component of membrane (GO:0016021);; Cellular Component: Golgi cist…	K08679|0.0|vvi:100241904|E5.1.3.6;EC:5.1.3.6|hypothetical protein LOC100241904; K08679 UDP-glucuronate 4-epimerase [EC:5.1.3.6]	[M]	Cell wall/membrane/envelope biogenesis	NAD dependent epimerase/dehydratase family;; GDP-mannose 4,6 dehydratase;; 3-beta hydroxysteroid dehydrogenase/isomerase family;; RmlD substrate binding domain;; Polysaccharide biosynthesis protein;; Male sterility protein	UDP-glucuronate 4-epimerase 6 OS=Arabidopsis thaliana OX=3702 GN=GAE6 PE=1 SV=1	UDP-glucuronate 4-epimerase 6-like [Helianthus annuus]
Unigene008009	66.0199	345.529	2.37825	1.1949e-55	7.45118e-54	up	[G]	Carbohydrate transport and metabolism	Molecular Function: hydrolase activity, hydrolyzing O-glycosyl compounds (GO:0004553);; Biological Process: metabolic process (GO:0008152);;	K05350|0.0|rcu:RCOM_0905360|bglB;EC:3.2.1.21|beta-glucosidase, putative (EC:3.2.1.21); K05350 beta-glucosidase [EC:3.2.1.21]	[G]	Carbohydrate transport and metabolism	Glycosyl hydrolase family 1;; Glycosyl hydrolase family 1	Beta-glucosidase 47 OS=Arabidopsis thaliana OX=3702 GN=BGLU47 PE=3 SV=2	hypothetical protein LSAT_4X60181 [Lactuca sativa]
Unigene008196	167.036	63.0987	-1.40173	4.07282e-16	4.83316e-15	down	--	--	--	K01193|6e-35|vvi:100262911|INV, sacA;EC:3.2.1.26|hypothetical protein LOC100262911; K01193 beta-fructofuranosidase [EC:3.2.1.26]	[G]	Carbohydrate transport and metabolism	Glycosyl hydrolases family 32 C terminal	Fructan 6-exohydrolase OS=Beta vulgaris OX=161934 GN=6-FEH PE=1 SV=1	putative beta-fructofuranosidase, insoluble isoenzyme CWINV5 [Helianthus annuus]
Unigene008894	1.82217	31.7846	3.86704	6.37932e-09	3.73642e-08	up	--	--	Biological Process: metabolic process (GO:0008152);; Molecular Function: polygalacturonate 4-alpha-galacturonosyltransferase activity (GO:0047262);;	K13648|3e-18|rcu:RCOM_0992220|GAUT;EC:2.4.1.43|Glycosyltransferase QUASIMODO1, putative; K13648 alpha-1,4-galacturonosyltransferase [EC:2.4.1.43]	--	--	--	Probable galacturonosyltransferase 6 OS=Arabidopsis thaliana OX=3702 GN=GAUT6 PE=2 SV=1	hypothetical protein LSAT_9X9781 [Lactuca sativa]
Unigene009043	90.8279	376.161	2.04348	1.81849e-49	9.46374e-48	up	[G]	Carbohydrate transport and metabolism	Molecular Function: alpha-amylase activity (GO:0004556);; Molecular Function: calcium ion binding (GO:0005509);; Biological Process: carbohydrate metabolic process (GO:0005975);;	K01176|0.0|pop:POPTR_918430|AMY, amyA, malS;EC:3.2.1.1|hypothetical protein; K01176 alpha-amylase [EC:3.2.1.1]	[G]	Carbohydrate transport and metabolism	Alpha-amylase C-terminal beta-sheet domain;; Alpha amylase, catalytic domain	Alpha-amylase OS=Vigna mungo OX=3915 GN=AMY1.1 PE=2 SV=1	alpha-amylase-like [Helianthus annuus]
Unigene009883	0.360846	7.60514	3.38429	0.00253727	0.00599864	up	[G]	Carbohydrate transport and metabolism	Molecular Function: ribokinase activity (GO:0004747);; Molecular Function: ATP binding (GO:0005524);; Biological Process: D-ribose metabolic process (GO:0006014);; Molecular Function: fructokinase activity (GO:0008865);; Cellular Component: chloroplast (GO:0009507);; Biological Process: starch biosynthetic process (GO:0019252);; Biological Process: carbohydrate phosphorylation (GO:0046835);;	K00847|1e-34|rcu:RCOM_1720250|E2.7.1.4, scrK;EC:2.7.1.4|fructokinase, putative (EC:2.7.1.4); K00847 fructokinase [EC:2.7.1.4]	[G]	Carbohydrate transport and metabolism	--	Probable fructokinase-5 OS=Arabidopsis thaliana OX=3702 GN=At4g10260 PE=2 SV=1	probable fructokinase-5 [Helianthus annuus]
Unigene010374	5.91708	56.5331	3.03999	1.86004e-05	6.59681e-05	up	[G]	Carbohydrate transport and metabolism	Molecular Function: hydrolase activity (GO:0016787);;	K01179|1e-172|vvi:100257079|E3.2.1.4;EC:3.2.1.4|hypothetical protein LOC100257079	--	--	Cellulase (glycosyl hydrolase family 5)	--	uncharacterized protein LOC111901105 isoform X1 [Lactuca sativa]
Unigene011768	102.612	224.76	1.12924	3.45343e-14	3.5059e-13	up	[G]	Carbohydrate transport and metabolism	--	K05350|1e-154|vvi:100267558|bglB;EC:3.2.1.21|hypothetical protein LOC100267558	[G]	Carbohydrate transport and metabolism	Glycosyl hydrolase family 1;; Glycosyl hydrolase family 1;; Glycosyl hydrolase family 1	Beta-glucosidase 18 OS=Oryza sativa subsp. japonica OX=39947 GN=BGLU18 PE=3 SV=2	beta-glucosidase 18-like isoform X1 [Helianthus annuus]
Unigene013435	59.5426	29.2412	-1.01664	0.000149636	0.000453496	down	[M]	Cell wall/membrane/envelope biogenesis	Molecular Function: UDP-glucose 6-dehydrogenase activity (GO:0003979);; Molecular Function: NAD binding (GO:0051287);; Biological Process: oxidation-reduction process (GO:0055114);;	K00012|1e-141|sbi:SORBI_01g043150|UGDH, ugd;EC:1.1.1.22|hypothetical protein; K00012 UDPglucose 6-dehydrogenase [EC:1.1.1.22]	[GT]	--	UDP-glucose/GDP-mannose dehydrogenase family, UDP binding domain;; UDP-glucose/GDP-mannose dehydrogenase family, central domain	UDP-glucose 6-dehydrogenase 4 OS=Oryza sativa subsp. japonica OX=39947 GN=UGD4 PE=2 SV=1	hypothetical protein Ccrd_015210 [Cynara cardunculus var. scolymus]
Unigene014168	166.725	45.1408	-1.87596	5.1572e-21	8.40626e-20	down	[G]	Carbohydrate transport and metabolism	Molecular Function: phosphorylase activity (GO:0004645);; Biological Process: carbohydrate metabolic process (GO:0005975);; Biological Process: response to stress (GO:0006950);; Cellular Component: chloroplast (GO:0009507);; Biological Process: response to abiotic stimulus (GO:0009628);;	K00688|7e-28|vvi:100257811|PYG, glgP;EC:2.4.1.1|hypothetical protein LOC100257811	[G]	Carbohydrate transport and metabolism	Carbohydrate phosphorylase	Alpha-1,4 glucan phosphorylase L isozyme, chloroplastic/amyloplastic OS=Vicia faba OX=3906 GN=PHO1 PE=2 SV=2	Alpha-1,4 glucan phosphorylase L isozyme, chloroplastic/amyloplastic [Apostasia shenzhenica]
Unigene015921	6.91819	34.8013	2.2657	5.33112e-07	2.40327e-06	up	[G]	Carbohydrate transport and metabolism	Molecular Function: hydrolase activity, hydrolyzing O-glycosyl compounds (GO:0004553);; Biological Process: carbohydrate metabolic process (GO:0005975);;	K05350|6e-96|vvi:100267558|bglB;EC:3.2.1.21|hypothetical protein LOC100267558	[G]	Carbohydrate transport and metabolism	Glycosyl hydrolase family 1	Beta-glucosidase 18 OS=Oryza sativa subsp. japonica OX=39947 GN=BGLU18 PE=3 SV=2	beta-glucosidase 18-like [Helianthus annuus]
Unigene016840	159.435	16.9913	-3.20697	2.44034e-39	9.03886e-38	down	--	--	Molecular Function: sucrose alpha-glucosidase activity (GO:0004575);; Cellular Component: vacuole (GO:0005773);; Biological Process: sucrose metabolic process (GO:0005985);; Molecular Function: 1,2-beta-fructan 1F-fructosyltransferase activity (GO:0047207);;	K01193|4e-43|vvi:100256970|INV, sacA;EC:3.2.1.26|hypothetical protein LOC100256970	[G]	Carbohydrate transport and metabolism	Glycosyl hydrolases family 32 C terminal	Beta-fructofuranosidase, soluble isoenzyme I OS=Daucus carota OX=4039 GN=INV*DC4 PE=1 SV=2	2,1-fructan:2,1-fructan 1-fructosyltransferase precursor, partial [Bellis perennis]
Unigene017057	187.781	436.587	1.2129	4.39521e-27	9.81171e-26	up	[M]	Cell wall/membrane/envelope biogenesis	Biological Process: response to hypoxia (GO:0001666);; Biological Process: starch metabolic process (GO:0005982);; Biological Process: sucrose metabolic process (GO:0005985);; Biological Process: seed maturation (GO:0010431);; Molecular Function: sucrose synthase activity (GO:0016157);; Biological Process: galactolipid biosynthetic process (GO:0019375);;	K00695|6e-65|vvi:100267606|E2.4.1.13;EC:2.4.1.13|hypothetical protein LOC100267606; K00695 sucrose synthase [EC:2.4.1.13]	[M]	Cell wall/membrane/envelope biogenesis	Sucrose synthase	Sucrose synthase 3 OS=Arabidopsis thaliana OX=3702 GN=SUS3 PE=1 SV=1	sucrose synthase 3-like isoform X2 [Helianthus annuus]
Unigene017270	21.6391	104.842	2.25884	2.67294e-17	3.45104e-16	up	[MG]	--	Biological Process: carbohydrate metabolic process (GO:0005975);; Cellular Component: membrane (GO:0016020);; Molecular Function: racemase and epimerase activity, acting on carbohydrates and derivatives (GO:0016857);; Molecular Function: coenzyme binding (GO:0050662);; Cellular Component: Golgi subcompartment (GO:0098791);;	K08679|6e-86|ath:AT4G30440|E5.1.3.6;EC:5.1.3.6|GAE1; GAE1 (UDP-D-GLUCURONATE 4-EPIMERASE 1); UDP-glucuronate 4-epimerase/ catalytic; K08679 UDP-glucuronate 4-epimerase [EC:5.1.3.6]	[M]	Cell wall/membrane/envelope biogenesis	GDP-mannose 4,6 dehydratase;; NAD dependent epimerase/dehydratase family;; 3-beta hydroxysteroid dehydrogenase/isomerase family;; Polysaccharide biosynthesis protein	UDP-glucuronate 4-epimerase 1 OS=Arabidopsis thaliana OX=3702 GN=GAE1 PE=1 SV=1	NAD-dependent epimerase/dehydratase [Cynara cardunculus var. scolymus]
Unigene018306	255.438	35.9715	-2.81632	4.28952e-56	2.71701e-54	down	[G]	Carbohydrate transport and metabolism	Molecular Function: alpha,alpha-trehalase activity (GO:0004555);; Biological Process: trehalose metabolic process (GO:0005991);;	K01194|5e-94|vvi:100246241|TREH, treA, treF;EC:3.2.1.28|hypothetical protein LOC100246241; K01194 alpha,alpha-trehalase [EC:3.2.1.28]	[G]	Carbohydrate transport and metabolism	Trehalase	Probable trehalase OS=Oryza sativa subsp. japonica OX=39947 GN=Os10g0521000 PE=2 SV=1	putative trehalase [Helianthus annuus]
Unigene018769	0.718933	16.8928	3.95485	1.10689e-05	4.07195e-05	up	--	--	Molecular Function: alpha,alpha-trehalose-phosphate synthase (UDP-forming) activity (GO:0003825);; Biological Process: trehalose biosynthetic process (GO:0005992);;	K16055|2e-11|zma:100381759|TPS;EC:2.4.1.15 3.1.3.12|hypothetical protein LOC100381759	[G]	Carbohydrate transport and metabolism	--	Alpha,alpha-trehalose-phosphate synthase [UDP-forming] 1 OS=Arabidopsis thaliana OX=3702 GN=TPS1 PE=1 SV=1	uncharacterized protein LOC100381759 [Zea mays]
Unigene019472	7.95794	35.7201	2.09613	1.13387e-05	4.16432e-05	up	[G]	Carbohydrate transport and metabolism	Molecular Function: catalytic activity (GO:0003824);; Biological Process: trehalose biosynthetic process (GO:0005992);;	K16055|1e-109|vvi:100246842|TPS;EC:2.4.1.15 3.1.3.12|hypothetical protein LOC100246842	[G]	Carbohydrate transport and metabolism	Glycosyltransferase family 20	Probable alpha,alpha-trehalose-phosphate synthase [UDP-forming] 10 OS=Arabidopsis thaliana OX=3702 GN=TPS10 PE=2 SV=1	Glycosyl transferase, family 20, partial [Cynara cardunculus var. scolymus]
Unigene019957	945.569	3799.1	2.00526	0	0	up	--	--	Molecular Function: enzyme inhibitor activity (GO:0004857);; Cellular Component: cell wall (GO:0005618);; Molecular Function: pectinesterase activity (GO:0030599);; Biological Process: cell wall modification (GO:0042545);; Biological Process: negative regulation of catalytic activity (GO:0043086);; Molecular Function: aspartyl esterase activity (GO:0045330);; Biological Process: pectin catabolic …	K01051|0.0|pop:POPTR_553829|E3.1.1.11;EC:3.1.1.11|hypothetical protein; K01051 pectinesterase [EC:3.1.1.11]	--	--	Pectinesterase;; Plant invertase/pectin methylesterase inhibitor	Pectinesterase/pectinesterase inhibitor U1 OS=Solanum lycopersicum OX=4081 GN=PMEU1 PE=2 SV=1	pectinesterase-like [Helianthus annuus]
Unigene020440	4.41159	12.8226	1.46349	0.0212558	0.0400577	up	[G]	Carbohydrate transport and metabolism	Molecular Function: hydrolase activity, hydrolyzing O-glycosyl compounds (GO:0004553);; Biological Process: carbohydrate metabolic process (GO:0005975);;	K01193|5e-20|vvi:100262911|INV, sacA;EC:3.2.1.26|hypothetical protein LOC100262911; K01193 beta-fructofuranosidase [EC:3.2.1.26]	[G]	Carbohydrate transport and metabolism	--	Beta-fructofuranosidase, insoluble isoenzyme 2 OS=Daucus carota OX=4039 GN=INV2 PE=3 SV=1	cell wall intertase CWI2 [Cichorium intybus]
Unigene021187	0	7.6242	4.11293	0.000450421	0.00124474	up	[G]	Carbohydrate transport and metabolism	Molecular Function: catalytic activity (GO:0003824);;	K02438|5e-64|vvi:100261768|glgX;EC:3.2.1.196|similar to isoamylase-type starch-debranching enzyme 1; K02438 glycogen operon protein GlgX [EC:3.2.1.-]	[G]	Carbohydrate transport and metabolism	Alpha amylase, catalytic domain	Isoamylase 1, chloroplastic OS=Arabidopsis thaliana OX=3702 GN=ISA1 PE=1 SV=1	isoamylase 1, chloroplastic [Helianthus annuus]
Unigene021225	671.512	5660.92	3.07334	0	0	up	[G]	Carbohydrate transport and metabolism	Biological Process: carbohydrate metabolic process (GO:0005975);; Molecular Function: fructan beta-fructosidase activity (GO:0051669);;	K01193|0.0|pop:POPTR_561648|INV, sacA;EC:3.2.1.26|hypothetical protein; K01193 beta-fructofuranosidase [EC:3.2.1.26]	[G]	Carbohydrate transport and metabolism	Glycosyl hydrolases family 32 N-terminal domain;; Glycosyl hydrolases family 32 C terminal	Beta-fructofuranosidase, insoluble isoenzyme CWINV1 OS=Arabidopsis thaliana OX=3702 GN=CWINV1 PE=1 SV=1	putative glycoside hydrolase, family 32 [Helianthus annuus]
Unigene021542	35.5928	111.595	1.63906	1.22602e-11	9.85285e-11	up	[MG]	--	Cellular Component: endosome (GO:0005768);; Cellular Component: trans-Golgi network (GO:0005802);; Biological Process: carbohydrate metabolic process (GO:0005975);; Cellular Component: integral component of membrane (GO:0016021);; Cellular Component: Golgi cisterna membrane (GO:0032580);; Biological Process: cellular metabolic process (GO:0044237);; Molecular Function: UDP-glucuronate 4-epimerase…	K08679|1e-131|rcu:RCOM_0782170|E5.1.3.6;EC:5.1.3.6|UDP-glucuronate 5-epimerase, putative (EC:5.1.3.12); K08679 UDP-glucuronate 4-epimerase [EC:5.1.3.6]	[M]	Cell wall/membrane/envelope biogenesis	NAD dependent epimerase/dehydratase family;; GDP-mannose 4,6 dehydratase	UDP-glucuronate 4-epimerase 1 OS=Arabidopsis thaliana OX=3702 GN=GAE1 PE=1 SV=1	UDP-glucuronate 4-epimerase 1-like [Lactuca sativa]
[truncated: 260 more rows]

[truncated: 2 more sheets: Table S11, Table S12]
